# Supplementary material for: Thermally induced structural transformations of linear coordination polymers based on aluminum tris(diorganophosphates)
Source: Royal Society of Chemistry journal article supplement (doi:10.1039/c8dt02672f), 2018-01-01
Supplement: c8dt02672f2.xlsx [file c8dt02672f2.xlsx]

## Sheet: Cooling 205 °C
2theta	Intensity
3.89731	1.51941
3.91565	1.41555
3.93399	1.39055
3.95232	1.37324
3.97066	1.43286
3.989	1.44247
4.00733	1.47517
4.02567	1.29438
4.04401	1.40593
4.06234	1.47325
4.08068	1.45594
4.09902	1.39055
4.11735	1.39824
4.13569	1.29246
4.15403	1.27515
4.17237	1.36554
4.1907	1.36939
4.20904	1.29823
4.22738	1.304
4.24571	1.31746
4.26405	1.30592
4.28239	1.31554
4.30072	1.33477
4.31906	1.28476
4.3374	1.28284
4.35573	1.35208
4.37407	1.33862
4.39241	1.39055
4.41075	1.24245
4.42908	1.33862
4.44742	1.17706
4.46576	1.32323
4.48409	1.25399
4.50243	1.2713
4.52077	1.34246
4.5391	1.27707
4.55744	1.21937
4.57578	1.28284
4.59411	1.2963
4.61245	1.29823
4.63079	1.34246
4.64913	1.35593
4.66746	1.27515
4.6858	1.23668
4.70414	1.16937
4.72247	1.20014
4.74081	1.25014
4.75915	1.22129
4.77748	1.17514
4.79582	1.21937
4.81416	1.2136
4.83249	1.25014
4.85083	1.24053
4.86917	1.25591
4.8875	1.20014
4.90584	1.304
4.92418	1.22322
4.94252	1.15013
4.96085	1.27322
4.97919	1.28861
4.99753	1.19245
5.01586	1.24437
5.0342	1.1559
5.05254	1.12705
5.07087	1.23476
5.08921	1.18091
5.10755	1.17514
5.12588	1.15013
5.14422	1.13667
5.16256	1.17706
5.1809	1.23668
5.19923	1.21552
5.21757	1.22129
5.23591	1.17321
5.25424	1.18475
5.27258	1.10782
5.29092	1.18091
5.30925	1.22322
5.32759	1.17706
5.34593	1.20399
5.36426	1.33092
5.3826	1.16167
5.40094	1.22129
5.41927	1.24053
5.43761	1.20591
5.45595	1.1636
5.47429	1.19437
5.49262	1.20399
5.51096	1.22129
5.5293	1.22322
5.54763	1.20783
5.56597	1.24822
5.58431	1.28669
5.60264	1.15783
5.62098	1.1636
5.63932	1.25207
5.65765	1.16552
5.67599	1.32515
5.69433	1.30977
5.71267	1.36747
5.731	1.25976
5.74934	1.354
5.76768	1.33669
5.78601	1.43863
5.80435	1.329
5.82269	1.44824
5.84102	1.48094
5.85936	1.53672
5.8777	1.58864
5.89603	1.57326
5.91437	1.63865
5.93271	1.61172
5.95104	1.63288
5.96938	1.68096
5.98772	1.87522
6.00606	1.78482
6.02439	1.78097
6.04273	1.8656
6.06107	1.79444
6.0794	2.05601
6.09774	2.04062
6.11608	2.10024
6.13441	2.10024
6.15275	2.13102
6.17109	2.18487
6.18942	2.4599
6.20776	2.50798
6.2261	2.61184
6.24444	2.65031
6.26277	2.658
6.28111	2.98496
6.29945	3.11382
6.31778	3.1946
6.33612	3.37539
6.35446	3.6485
6.37279	3.69466
6.39113	3.9043
6.40947	4.24087
6.4278	4.33896
6.44614	4.64284
6.46448	5.00635
6.48282	5.48332
6.50115	5.82375
6.51949	6.018
6.53783	6.29688
6.55616	6.79694
6.5745	7.16044
6.59284	7.74897
6.61117	8.13363
6.62951	8.66254
6.64785	9.27415
6.66618	10.2512
6.68452	11.0243
6.70286	12.1803
6.72119	13.3496
6.73953	14.2305
6.75787	15.6614
6.77621	17.1654
6.79454	18.781
6.81288	19.985
6.83122	22.7161
6.84955	24.9452
6.86789	26.6781
6.88623	29.0534
6.90456	32.2345
6.9229	35.3022
6.94124	39.2276
6.95957	43.3665
6.97791	48.0344
6.99625	55.2429
7.01459	63.1284
7.03292	71.7987
7.05126	82.4191
7.0696	96.1746
7.08793	111.017
7.10627	126.665
7.12461	143.722
7.14294	156.224
7.16128	157.845
7.17962	145.546
7.19795	121.901
7.21629	93.1819
7.23463	67.8828
7.25296	47.569
7.2713	34.9463
7.28964	26.5031
7.30798	20.11
7.32631	14.946
7.34465	10.5281
7.36299	7.61049
7.38132	5.80836
7.39966	4.91403
7.418	4.33127
7.43633	3.89083
7.45467	3.44463
7.47301	3.03112
7.49134	2.66569
7.50968	2.34835
7.52802	2.06178
7.54636	1.94061
7.56469	1.93099
7.58303	1.67519
7.60137	1.71558
7.6197	1.65981
7.63804	1.47325
7.65638	1.34439
7.67471	1.37901
7.69305	1.37708
7.71139	1.29438
7.72972	1.2386
7.74806	1.25207
7.7664	1.22899
7.78473	1.11167
7.80307	1.08282
7.82141	0.994345
7.83975	1.00589
7.85808	1.06743
7.87642	1.00204
7.89476	1.05012
7.91309	0.942416
7.93143	0.936647
7.94977	0.934723
7.9681	0.942416
7.98644	0.871254
8.00478	0.907797
8.02311	0.852021
8.04145	0.828942
8.05979	0.75778
8.07813	0.75201
8.09646	0.800092
8.1148	0.765473
8.13314	0.796246
8.15147	0.844328
8.16981	0.819325
8.18815	0.725084
8.20648	0.738547
8.22482	0.692388
8.24316	0.775089
8.26149	0.72893
8.27983	0.703927
8.29817	0.678924
8.3165	0.678924
8.33484	0.657768
8.35318	0.677001
8.37152	0.659691
8.38985	0.682771
8.40819	0.57699
8.42653	0.655845
8.44486	0.675078
8.4632	0.607762
8.48154	0.636612
8.49987	0.625072
8.51821	0.644305
8.53655	0.665461
8.55488	0.632765
8.57322	0.575066
8.59156	0.690464
8.6099	0.601993
8.62823	0.594299
8.64657	0.584683
8.66491	0.561603
8.68324	0.611609
8.70158	0.57699
8.71992	0.528907
8.73825	0.546217
8.75659	0.557757
8.77493	0.57122
8.79326	0.569296
8.8116	0.544294
8.82994	0.55968
8.84828	0.55968
8.86661	0.600069
8.88495	0.517367
8.90329	0.615456
8.92162	0.598146
8.93996	0.511597
8.9583	0.55391
8.97663	0.569296
8.99497	0.532754
9.01331	0.573143
9.03164	0.557757
9.04998	0.544294
9.06832	0.550063
9.08665	0.551987
9.10499	0.494288
9.12333	0.58276
9.14167	0.517367
9.16	0.53083
9.17834	0.5366
9.19668	0.57699
9.21501	0.482748
9.23335	0.501981
9.25169	0.492365
9.27002	0.521214
9.28836	0.534677
9.3067	0.469285
9.32503	0.532754
9.34337	0.511597
9.36171	0.513521
9.38005	0.496211
9.39838	0.521214
9.41672	0.473132
9.43506	0.505828
9.45339	0.471208
9.47173	0.480825
9.49007	0.511597
9.5084	0.484671
9.52674	0.473132
9.54508	0.511597
9.56341	0.546217
9.58175	0.507751
9.60009	0.457745
9.61842	0.459668
9.63676	0.438512
9.6551	0.455822
9.67344	0.480825
9.69177	0.498134
9.71011	0.434666
9.72845	0.444282
9.74678	0.426972
9.76512	0.482748
9.78346	0.507751
9.80179	0.457745
9.82013	0.382736
9.83847	0.490441
9.8568	0.457745
9.87514	0.421202
9.89348	0.478901
9.91182	0.438512
9.93015	0.459668
9.94849	0.465438
9.96683	0.461592
9.98516	0.407739
10.0035	0.446205
10.0218	0.457745
10.0402	0.415433
10.0585	0.426972
10.0768	0.392353
10.0952	0.507751
10.1135	0.426972
10.1319	0.436589
10.1502	0.471208
10.1685	0.444282
10.1869	0.482748
10.2052	0.461592
10.2235	0.473132
10.2419	0.475055
10.2602	0.450052
10.2786	0.430819
10.2969	0.488518
10.3152	0.457745
10.3336	0.461592
10.3519	0.36158
10.3702	0.461592
10.3886	0.446205
10.4069	0.403893
10.4252	0.434666
10.4436	0.411586
10.4619	0.486595
10.4803	0.475055
10.4986	0.473132
10.5169	0.450052
10.5353	0.457745
10.5536	0.471208
10.5719	0.392353
10.5903	0.411586
10.6086	0.413509
10.627	0.432742
10.6453	0.438512
10.6636	0.428896
10.682	0.415433
10.7003	0.417356
10.7186	0.388506
10.737	0.419279
10.7553	0.442359
10.7736	0.428896
10.792	0.415433
10.8103	0.434666
10.8287	0.417356
10.847	0.400046
10.8653	0.407739
10.8837	0.365427
10.902	0.453899
10.9203	0.432742
10.9387	0.365427
10.957	0.450052
10.9754	0.453899
10.9937	0.475055
11.012	0.440435
11.0304	0.473132
11.0487	0.392353
11.067	0.438512
11.0854	0.413509
11.1037	0.434666
11.1221	0.440435
11.1404	0.380813
11.1587	0.3962
11.1771	0.386583
11.1954	0.436589
11.2137	0.409663
11.2321	0.415433
11.2504	0.39043
11.2687	0.438512
11.2871	0.413509
11.3054	0.425049
11.3238	0.405816
11.3421	0.450052
11.3604	0.392353
11.3788	0.469285
11.3971	0.423126
11.4154	0.3962
11.4338	0.3962
11.4521	0.405816
11.4705	0.369273
11.4888	0.444282
11.5071	0.342347
11.5255	0.386583
11.5438	0.401969
11.5621	0.453899
11.5805	0.338501
11.5988	0.428896
11.6171	0.392353
11.6355	0.446205
11.6538	0.430819
11.6722	0.405816
11.6905	0.423126
11.7088	0.401969
11.7272	0.394276
11.7455	0.409663
11.7638	0.450052
11.7822	0.400046
11.8005	0.461592
11.8189	0.407739
11.8372	0.442359
11.8555	0.417356
11.8739	0.444282
11.8922	0.448129
11.9105	0.38466
11.9289	0.444282
11.9472	0.436589
11.9655	0.403893
11.9839	0.538524
12.0022	0.465438
12.0206	0.538524
12.0389	0.471208
12.0572	0.532754
12.0756	0.563527
12.0939	0.603916
12.1122	0.601993
12.1306	0.611609
12.1489	0.601993
12.1673	0.709697
12.1856	0.75201
12.2039	0.855868
12.2223	0.902027
12.2406	1.09628
12.2589	1.15206
12.2773	1.23476
12.2956	1.45017
12.3139	1.61365
12.3323	1.74251
12.3506	2.05408
12.369	2.21179
12.3873	2.10409
12.4056	1.9733
12.424	1.81175
12.4423	1.49056
12.4606	1.15975
12.479	0.846251
12.4973	0.686618
12.5157	0.690464
12.534	0.55391
12.5523	0.509674
12.5707	0.575066
12.589	0.492365
12.6073	0.448129
12.6257	0.465438
12.644	0.457745
12.6624	0.469285
12.6807	0.459668
12.699	0.434666
12.7174	0.438512
12.7357	0.36735
12.754	0.442359
12.7724	0.438512
12.7907	0.3962
12.809	0.450052
12.8274	0.380813
12.8457	0.380813
12.8641	0.415433
12.8824	0.442359
12.9007	0.407739
12.9191	0.432742
12.9374	0.448129
12.9557	0.394276
12.9741	0.375043
12.9924	0.411586
13.0108	0.36158
13.0291	0.36158
13.0474	0.35004
13.0658	0.423126
13.0841	0.357734
13.1024	0.38466
13.1208	0.403893
13.1391	0.37889
13.1574	0.357734
13.1758	0.39043
13.1941	0.375043
13.2125	0.37312
13.2308	0.376967
13.2491	0.375043
13.2675	0.425049
13.2858	0.400046
13.3041	0.375043
13.3225	0.376967
13.3408	0.375043
13.3592	0.409663
13.3775	0.382736
13.3958	0.39043
13.4142	0.382736
13.4325	0.371197
13.4508	0.400046
13.4692	0.398123
13.4875	0.369273
13.5058	0.401969
13.5242	0.353887
13.5425	0.371197
13.5609	0.348117
13.5792	0.38466
13.5975	0.37312
13.6159	0.346194
13.6342	0.3962
13.6525	0.334654
13.6709	0.37889
13.6892	0.380813
13.7076	0.39043
13.7259	0.386583
13.7442	0.407739
13.7626	0.403893
13.7809	0.392353
13.7992	0.457745
13.8176	0.340424
13.8359	0.382736
13.8542	0.465438
13.8726	0.382736
13.8909	0.376967
13.9093	0.3962
13.9276	0.37312
13.9459	0.423126
13.9643	0.409663
13.9826	0.436589
14.0009	0.405816
14.0193	0.415433
14.0376	0.450052
14.056	0.413509
14.0743	0.428896
14.0926	0.357734
14.111	0.407739
14.1293	0.459668
14.1476	0.425049
14.166	0.419279
14.1843	0.453899
14.2026	0.430819
14.221	0.436589
14.2393	0.484671
14.2577	0.461592
14.276	0.511597
14.2943	0.457745
14.3127	0.436589
14.331	0.465438
14.3493	0.461592
14.3677	0.409663
14.386	0.413509
14.4044	0.3962
14.4227	0.405816
14.441	0.463515
14.4594	0.388506
14.4777	0.442359
14.496	0.436589
14.5144	0.359657
14.5327	0.359657
14.5511	0.419279
14.5694	0.421202
14.5877	0.446205
14.6061	0.348117
14.6244	0.398123
14.6427	0.421202
14.6611	0.428896
14.6794	0.409663
14.6977	0.369273
14.7161	0.411586
14.7344	0.413509
14.7528	0.407739
14.7711	0.446205
14.7894	0.398123
14.8078	0.413509
14.8261	0.446205
14.8444	0.38466
14.8628	0.486595
14.8811	0.494288
14.8995	0.484671
14.9178	0.475055
14.9361	0.407739
14.9545	0.453899
14.9728	0.434666
14.9911	0.434666
15.0095	0.432742
15.0278	0.425049
15.0461	0.407739
15.0645	0.398123
15.0828	0.359657
15.1012	0.405816
15.1195	0.375043
15.1378	0.351964
15.1562	0.35581
15.1745	0.369273
15.1928	0.401969
15.2112	0.380813
15.2295	0.36158
15.2479	0.392353
15.2662	0.380813
15.2845	0.409663
15.3029	0.38466
15.3212	0.380813
15.3395	0.37312
15.3579	0.369273
15.3762	0.386583
15.3945	0.417356
15.4129	0.380813
15.4312	0.413509
15.4496	0.37312
15.4679	0.371197
15.4862	0.400046
15.5046	0.376967
15.5229	0.380813
15.5412	0.405816
15.5596	0.365427
15.5779	0.392353
15.5963	0.380813
15.6146	0.353887
15.6329	0.419279
15.6513	0.3962
15.6696	0.338501
15.6879	0.398123
15.7063	0.405816
15.7246	0.400046
15.7429	0.319268
15.7613	0.388506
15.7796	0.39043
15.798	0.353887
15.8163	0.426972
15.8346	0.3962
15.853	0.407739
15.8713	0.444282
15.8896	0.382736
15.908	0.401969
15.9263	0.37889
15.9447	0.440435
15.963	0.403893
15.9813	0.369273
15.9997	0.398123
16.018	0.401969
16.0363	0.3962
16.0547	0.3962
16.073	0.394276
16.0914	0.403893
16.1097	0.37889
16.128	0.342347
16.1464	0.36158
16.1647	0.409663
16.183	0.386583
16.2014	0.411586
16.2197	0.375043
16.238	0.409663
16.2564	0.417356
16.2747	0.457745
16.2931	0.407739
16.3114	0.463515
16.3297	0.419279
16.3481	0.39043
16.3664	0.371197
16.3847	0.386583
16.4031	0.478901
16.4214	0.428896
16.4398	0.392353
16.4581	0.403893
16.4764	0.419279
16.4948	0.426972
16.5131	0.428896
16.5314	0.413509
16.5498	0.405816
16.5681	0.37312
16.5864	0.444282
16.6048	0.405816
16.6231	0.434666
16.6415	0.409663
16.6598	0.39043
16.6781	0.411586
16.6965	0.39043
16.7148	0.480825
16.7331	0.453899
16.7515	0.405816
16.7698	0.380813
16.7882	0.411586
16.8065	0.400046
16.8248	0.434666
16.8432	0.442359
16.8615	0.448129
16.8798	0.469285
16.8982	0.426972
16.9165	0.426972
16.9348	0.440435
16.9532	0.425049
16.9715	0.448129
16.9899	0.407739
17.0082	0.440435
17.0265	0.425049
17.0449	0.476978
17.0632	0.457745
17.0815	0.453899
17.0999	0.478901
17.1182	0.475055
17.1366	0.440435
17.1549	0.417356
17.1732	0.492365
17.1916	0.432742
17.2099	0.488518
17.2282	0.417356
17.2466	0.486595
17.2649	0.461592
17.2832	0.471208
17.3016	0.494288
17.3199	0.471208
17.3383	0.501981
17.3566	0.476978
17.3749	0.407739
17.3933	0.486595
17.4116	0.505828
17.4299	0.453899
17.4483	0.471208
17.4666	0.463515
17.485	0.538524
17.5033	0.511597
17.5216	0.55391
17.54	0.540447
17.5583	0.526984
17.5766	0.5366
17.595	0.573143
17.6133	0.544294
17.6316	0.563527
17.65	0.615456
17.6683	0.651998
17.6867	0.694311
17.705	0.665461
17.7233	0.644305
17.7417	0.617379
17.76	0.640459
17.7783	0.615456
17.7967	0.665461
17.815	0.648152
17.8334	0.673155
17.8517	0.634689
17.87	0.698157
17.8884	0.732777
17.9067	0.665461
17.925	0.628919
17.9434	0.719314
17.9617	0.832788
17.9801	0.778936
17.9984	0.807786
18.0167	0.857791
18.0351	0.871254
18.0534	0.869331
18.0717	0.878948
18.0901	0.744317
18.1084	0.680848
18.1267	0.646228
18.1451	0.617379
18.1634	0.634689
18.1818	0.615456
18.2001	0.621226
18.2184	0.55968
18.2368	0.538524
18.2551	0.54237
18.2734	0.57122
18.2918	0.513521
18.3101	0.569296
18.3285	0.509674
18.3468	0.521214
18.3651	0.528907
18.3835	0.603916
18.4018	0.578913
18.4201	0.519291
18.4385	0.446205
18.4568	0.544294
18.4751	0.538524
18.4935	0.54237
18.5118	0.532754
18.5302	0.605839
18.5485	0.598146
18.5668	0.592376
18.5852	0.53083
18.6035	0.55391
18.6218	0.551987
18.6402	0.596223
18.6585	0.677001
18.6769	0.584683
18.6952	0.659691
18.7135	0.651998
18.7319	0.663538
18.7502	0.644305
18.7685	0.686618
18.7869	0.748163
18.8052	0.877024
18.8235	0.878948
18.8419	0.953956
18.8602	1.0732
18.8786	1.23476
18.8969	1.40785
18.9152	1.53095
18.9336	1.62519
18.9519	1.69058
18.9702	1.68096
18.9886	1.71943
19.0069	1.53479
19.0253	1.40401
19.0436	1.28092
19.0619	1.2136
19.0803	1.08666
19.0986	0.961649
19.1169	0.94434
19.1353	0.952033
19.1536	1.0482
19.1719	0.967419
19.1903	0.92703
19.2086	1.01743
19.227	1.03858
19.2453	1.09436
19.2636	1.0732
19.282	1.12321
19.3003	1.08859
19.3186	0.984729
19.337	0.963573
19.3553	0.867408
19.3737	0.91549
19.392	0.92703
19.4103	0.813555
19.4287	0.773166
19.447	0.784706
19.4653	0.730854
19.4837	0.72893
19.502	0.76355
19.5204	0.636612
19.5387	0.611609
19.557	0.640459
19.5754	0.607762
19.5937	0.619302
19.612	0.609686
19.6304	0.605839
19.6487	0.555833
19.667	0.613532
19.6854	0.600069
19.7037	0.578913
19.7221	0.58276
19.7404	0.642382
19.7587	0.594299
19.7771	0.586606
19.7954	0.601993
19.8137	0.607762
19.8321	0.594299
19.8504	0.575066
19.8688	0.517367
19.8871	0.551987
19.9054	0.567373
19.9238	0.532754
19.9421	0.551987
19.9604	0.592376
19.9788	0.575066
19.9971	0.603916
20.0154	0.611609
20.0338	0.551987
20.0521	0.598146
20.0705	0.601993
20.0888	0.584683
20.1071	0.555833
20.1255	0.636612
20.1438	0.551987
20.1621	0.546217
20.1805	0.507751
20.1988	0.600069
20.2172	0.569296
20.2355	0.621226
20.2538	0.578913
20.2722	0.57699
20.2905	0.590453
20.3088	0.634689
20.3272	0.623149
20.3455	0.648152
20.3638	0.628919
20.3822	0.721237
20.4005	0.640459
20.4189	0.659691
20.4372	0.694311
20.4555	0.694311
20.4739	0.76355
20.4922	0.72316
20.5105	0.677001
20.5289	0.680848
20.5472	0.700081
20.5656	0.721237
20.5839	0.636612
20.6022	0.700081
20.6206	0.777013
20.6389	0.721237
20.6572	0.644305
20.6756	0.71739
20.6939	0.700081
20.7122	0.686618
20.7306	0.636612
20.7489	0.594299
20.7673	0.603916
20.7856	0.640459
20.8039	0.638535
20.8223	0.673155
20.8406	0.669308
20.8589	0.684694
20.8773	0.663538
20.8956	0.655845
20.914	0.657768
20.9323	0.700081
20.9506	0.748163
20.969	0.753933
20.9873	0.730854
21.0056	0.719314
21.024	0.865484
21.0423	0.803939
21.0607	0.93857
21.079	0.90395
21.0973	1.07128
21.1157	1.09436
21.134	1.10397
21.1523	1.27899
21.1707	1.35208
21.189	1.5598
21.2073	1.7252
21.2257	1.63288
21.244	1.98869
21.2624	1.99446
21.2807	2.05024
21.299	2.10409
21.3174	2.03293
21.3357	2.05985
21.354	1.80598
21.3724	1.68096
21.3907	1.57903
21.4091	1.46555
21.4274	1.50594
21.4457	1.21937
21.4641	1.21937
21.4824	1.13475
21.5007	1.2386
21.5191	1.1636
21.5374	1.07512
21.5557	1.06935
21.5741	1.00781
21.5924	0.946263
21.6108	0.859715
21.6291	0.807786
21.6474	0.730854
21.6658	0.680848
21.6841	0.732777
21.7024	0.721237
21.7208	0.609686
21.7391	0.605839
21.7575	0.671231
21.7758	0.715467
21.7941	0.569296
21.8125	0.551987
21.8308	0.567373
21.8491	0.634689
21.8675	0.594299
21.8858	0.632765
21.9041	0.557757
21.9225	0.586606
21.9408	0.671231
21.9592	0.630842
21.9775	0.709697
21.9958	0.613532
22.0142	0.630842
22.0325	0.634689
22.0508	0.638535
22.0692	0.601993
22.0875	0.617379
22.1059	0.646228
22.1242	0.561603
22.1425	0.575066
22.1609	0.511597
22.1792	0.601993
22.1975	0.592376
22.2159	0.636612
22.2342	0.613532
22.2525	0.651998
22.2709	0.653922
22.2892	0.584683
22.3076	0.680848
22.3259	0.634689
22.3442	0.526984
22.3626	0.626995
22.3809	0.557757
22.3992	0.586606
22.4176	0.613532
22.4359	0.57699
22.4543	0.657768
22.4726	0.588529
22.4909	0.615456
22.5093	0.632765
22.5276	0.596223
22.5459	0.586606
22.5643	0.55968
22.5826	0.575066
22.6009	0.611609
22.6193	0.598146
22.6376	0.609686
22.656	0.688541
22.6743	0.705851
22.6926	0.730854
22.711	0.732777
22.7293	0.817402
22.7476	0.771243
22.766	0.784706
22.7843	0.853945
22.8027	0.963573
22.821	0.898181
22.8393	0.975113
22.8577	0.93857
22.876	0.963573
22.8943	0.878948
22.9127	0.94434
22.931	0.963573
22.9494	0.834712
22.9677	0.884717
22.986	0.840482
23.0044	0.811632
23.0227	0.811632
23.041	0.696234
23.0594	0.786629
23.0777	0.744317
23.096	0.688541
23.1144	0.727007
23.1327	0.74624
23.1511	0.661615
23.1694	0.621226
23.1877	0.55968
23.2061	0.634689
23.2244	0.655845
23.2427	0.607762
23.2611	0.584683
23.2794	0.596223
23.2978	0.659691
23.3161	0.657768
23.3344	0.600069
23.3528	0.713544
23.3711	0.600069
23.3894	0.638535
23.4078	0.625072
23.4261	0.623149
23.4444	0.642382
23.4628	0.636612
23.4811	0.598146
23.4995	0.503904
23.5178	0.561603
23.5361	0.601993
23.5545	0.492365
23.5728	0.517367
23.5911	0.523137
23.6095	0.58276
23.6278	0.586606
23.6462	0.521214
23.6645	0.575066
23.6828	0.594299
23.7012	0.569296
23.7195	0.546217
23.7378	0.625072
23.7562	0.53083
23.7745	0.573143
23.7928	0.648152
23.8112	0.625072
23.8295	0.55391
23.8479	0.632765
23.8662	0.590453
23.8845	0.671231
23.9029	0.596223
23.9212	0.667385
23.9395	0.730854
23.9579	0.719314
23.9762	0.753933
23.9946	0.721237
24.0129	0.76355
24.0312	0.748163
24.0496	0.71739
24.0679	0.727007
24.0862	0.72893
24.1046	0.671231
24.1229	0.703927
24.1412	0.673155
24.1596	0.702004
24.1779	0.646228
24.1963	0.709697
24.2146	0.663538
24.2329	0.623149
24.2513	0.607762
24.2696	0.54237
24.2879	0.596223
24.3063	0.613532
24.3246	0.621226
24.343	0.557757
24.3613	0.58276
24.3796	0.567373
24.398	0.596223
24.4163	0.575066
24.4346	0.563527
24.453	0.605839
24.4713	0.478901
24.4897	0.492365
24.508	0.55391
24.5263	0.586606
24.5447	0.625072
24.563	0.555833
24.5813	0.594299
24.5997	0.546217
24.618	0.523137
24.6363	0.53083
24.6547	0.563527
24.673	0.517367
24.6914	0.630842
24.7097	0.546217
24.728	0.573143
24.7464	0.567373
24.7647	0.651998
24.783	0.561603
24.8014	0.665461
24.8197	0.638535
24.8381	0.682771
24.8564	0.677001
24.8747	0.74624
24.8931	0.698157
24.9114	0.705851
24.9297	0.71739
24.9481	0.773166
24.9664	0.784706
24.9847	0.911644
25.0031	0.836635
25.0214	0.888564
25.0398	0.877024
25.0581	0.848175
25.0764	0.890487
25.0948	0.817402
25.1131	0.836635
25.1314	0.802016
25.1498	0.786629
25.1681	0.736623
25.1865	0.72316
25.2048	0.659691
25.2231	0.653922
25.2415	0.640459
25.2598	0.655845
25.2781	0.626995
25.2965	0.613532
25.3148	0.573143
25.3331	0.55391
25.3515	0.507751
25.3698	0.580836
25.3882	0.55391
25.4065	0.526984
25.4248	0.480825
25.4432	0.540447
25.4615	0.501981
25.4798	0.56545
25.4982	0.525061
25.5165	0.540447
25.5349	0.476978
25.5532	0.448129
25.5715	0.469285
25.5899	0.488518
25.6082	0.515444
25.6265	0.455822
25.6449	0.482748
25.6632	0.471208
25.6815	0.525061
25.6999	0.507751
25.7182	0.523137
25.7366	0.519291
25.7549	0.546217
25.7732	0.467362
25.7916	0.519291
25.8099	0.501981
25.8282	0.540447
25.8466	0.500058
25.8649	0.473132
25.8833	0.525061
25.9016	0.505828
25.9199	0.478901
25.9383	0.521214
25.9566	0.507751
25.9749	0.476978
25.9933	0.496211
26.0116	0.482748
26.0299	0.473132
26.0483	0.421202
26.0666	0.500058
26.085	0.480825
26.1033	0.409663
26.1216	0.463515
26.14	0.413509
26.1583	0.463515
26.1766	0.471208
26.195	0.398123
26.2133	0.430819
26.2317	0.513521
26.25	0.363503
26.2683	0.401969
26.2867	0.453899
26.305	0.469285
26.3233	0.457745
26.3417	0.434666
26.36	0.446205
26.3784	0.382736
26.3967	0.428896
26.415	0.394276
26.4334	0.380813
26.4517	0.432742
26.47	0.459668
26.4884	0.463515
26.5067	0.419279
26.525	0.417356
26.5434	0.465438
26.5617	0.425049
26.5801	0.409663
26.5984	0.413509
26.6167	0.375043
26.6351	0.421202
26.6534	0.448129
26.6717	0.409663
26.6901	0.376967
26.7084	0.446205
26.7268	0.457745
26.7451	0.434666
26.7634	0.469285
26.7818	0.473132
26.8001	0.482748
26.8184	0.475055
26.8368	0.428896
26.8551	0.528907
26.8734	0.482748
26.8918	0.53083
26.9101	0.480825
26.9285	0.405816
26.9468	0.484671
26.9651	0.463515
26.9835	0.461592
27.0018	0.505828
27.0201	0.53083
27.0385	0.469285
27.0568	0.53083
27.0752	0.578913
27.0935	0.54237
27.1118	0.492365
27.1302	0.494288
27.1485	0.575066
27.1668	0.526984
27.1852	0.557757
27.2035	0.5366
27.2218	0.528907
27.2402	0.511597
27.2585	0.451975
27.2769	0.432742
27.2952	0.467362
27.3135	0.496211
27.3319	0.465438
27.3502	0.428896
27.3685	0.413509
27.3869	0.444282
27.4052	0.423126
27.4236	0.417356
27.4419	0.39043
27.4602	0.38466
27.4786	0.400046
27.4969	0.421202
27.5152	0.37889
27.5336	0.415433
27.5519	0.398123
27.5702	0.440435
27.5886	0.450052
27.6069	0.3962
27.6253	0.425049
27.6436	0.450052
27.6619	0.419279
27.6803	0.446205
27.6986	0.446205
27.7169	0.469285
27.7353	0.426972
27.7536	0.463515
27.772	0.467362
27.7903	0.421202
27.8086	0.38466
27.827	0.417356
27.8453	0.438512
27.8636	0.448129
27.882	0.400046
27.9003	0.413509
27.9187	0.369273
27.937	0.444282
27.9553	0.371197
27.9737	0.376967
27.992	0.415433
28.0103	0.376967
28.0287	0.36158
28.047	0.386583
28.0653	0.380813
28.0837	0.398123
28.102	0.363503
28.1204	0.326961
28.1387	0.3962
28.157	0.394276
28.1754	0.348117
28.1937	0.401969
28.212	0.392353
28.2304	0.359657
28.2487	0.405816
28.2671	0.35004
28.2854	0.394276
28.3037	0.411586
28.3221	0.348117
28.3404	0.351964
28.3587	0.37889
28.3771	0.35004
28.3954	0.380813
28.4137	0.332731
28.4321	0.357734
28.4504	0.423126
28.4688	0.375043
28.4871	0.36735
28.5054	0.409663
28.5238	0.386583
28.5421	0.411586
28.5604	0.386583
28.5788	0.411586
28.5971	0.419279
28.6155	0.386583
28.6338	0.415433
28.6521	0.451975
28.6705	0.434666
28.6888	0.461592
28.7071	0.475055
28.7255	0.432742
28.7438	0.526984
28.7621	0.461592
28.7805	0.415433
28.7988	0.528907
28.8172	0.467362
28.8355	0.538524
28.8538	0.515444
28.8722	0.56545
28.8905	0.492365
28.9088	0.55968
28.9272	0.557757
28.9455	0.573143
28.9639	0.663538
28.9822	0.638535
29.0005	0.611609
29.0189	0.586606
29.0372	0.54814
29.0555	0.626995
29.0739	0.578913
29.0922	0.509674
29.1105	0.511597
29.1289	0.496211
29.1472	0.438512
29.1656	0.505828
29.1839	0.507751
29.2022	0.488518
29.2206	0.403893
29.2389	0.440435
29.2572	0.37889
29.2756	0.434666
29.2939	0.388506
29.3123	0.359657
29.3306	0.403893
29.3489	0.394276
29.3673	0.365427
29.3856	0.338501
29.4039	0.305805
29.4223	0.365427
29.4406	0.317344
29.459	0.398123
29.4773	0.35004
29.4956	0.386583
29.514	0.359657
29.5323	0.35581
29.5506	0.332731
29.569	0.35004
29.5873	0.338501
29.6056	0.351964
29.624	0.334654
29.6423	0.348117
29.6607	0.35004
29.679	0.330807
29.6973	0.357734
29.7157	0.340424
29.734	0.328884
29.7523	0.330807
29.7707	0.309651
29.789	0.300035
29.8074	0.36158
29.8257	0.35004
29.844	0.319268
29.8624	0.292341
29.8807	0.303881
29.899	0.307728
29.9174	0.307728
29.9357	0.365427
29.954	0.357734
29.9724	0.294265
29.9907	0.305805
30.0091	0.334654
30.0274	0.273108
30.0457	0.311574
30.0641	0.300035
30.0824	0.276955
30.1007	0.296188
30.1191	0.325038
30.1374	0.305805
30.1558	0.351964
30.1741	0.323114
30.1924	0.307728
30.2108	0.301958
30.2291	0.336577
30.2474	0.342347
30.2658	0.301958
30.2841	0.288495
30.3024	0.307728
30.3208	0.311574
30.3391	0.315421
30.3575	0.300035
30.3758	0.338501
30.3941	0.307728
30.4125	0.35581
30.4308	0.301958
30.4491	0.348117
30.4675	0.300035
30.4858	0.307728
30.5042	0.284648
30.5225	0.317344
30.5408	0.317344
30.5592	0.280802
30.5775	0.357734
30.5958	0.340424
30.6142	0.348117
30.6325	0.342347
30.6508	0.325038
30.6692	0.338501
30.6875	0.417356
30.7059	0.37889
30.7242	0.39043
30.7425	0.37312
30.7609	0.398123
30.7792	0.37312
30.7975	0.403893
30.8159	0.363503
30.8342	0.332731
30.8526	0.351964
30.8709	0.280802
30.8892	0.357734
30.9076	0.35581
30.9259	0.386583
30.9442	0.280802
30.9626	0.330807
30.9809	0.332731
30.9992	0.317344
31.0176	0.330807
31.0359	0.315421
31.0543	0.300035
31.0726	0.332731
31.0909	0.292341
31.1093	0.305805
31.1276	0.311574
31.1459	0.294265
31.1643	0.309651
31.1826	0.278878
31.201	0.307728
31.2193	0.315421
31.2376	0.319268
31.256	0.342347
31.2743	0.317344
31.2926	0.275032
31.311	0.307728
31.3293	0.338501
31.3477	0.336577
31.366	0.298111
31.3843	0.328884
31.4027	0.315421
31.421	0.321191
31.4393	0.325038
31.4577	0.342347
31.476	0.359657
31.4943	0.353887
31.5127	0.36735
31.531	0.317344
31.5494	0.401969
31.5677	0.371197
31.586	0.359657
31.6044	0.453899
31.6227	0.421202
31.641	0.388506
31.6594	0.411586
31.6777	0.348117
31.6961	0.386583
31.7144	0.403893
31.7327	0.34427
31.7511	0.365427
31.7694	0.346194
31.7877	0.334654
31.8061	0.276955
31.8244	0.286572
31.8427	0.323114
31.8611	0.319268
31.8794	0.300035
31.8978	0.286572
31.9161	0.300035
31.9344	0.311574
31.9528	0.315421
31.9711	0.300035
31.9894	0.251952
32.0078	0.250029
32.0261	0.319268
32.0445	0.282725
32.0628	0.261569
32.0811	0.342347
32.0995	0.253875
32.1178	0.273108
32.1361	0.253875
32.1545	0.257722
32.1728	0.225026
32.1911	0.253875
32.2095	0.253875
32.2278	0.250029
32.2462	0.263492
32.2645	0.259645
32.2828	0.278878
32.3012	0.326961
32.3195	0.290418
32.3378	0.269262
32.3562	0.255799
32.3745	0.273108
32.3929	0.301958
32.4112	0.255799
32.4295	0.323114
32.4479	0.332731
32.4662	0.255799
32.4845	0.305805
32.5029	0.298111
32.5212	0.280802
32.5395	0.267339
32.5579	0.280802
32.5762	0.292341
32.5946	0.292341
32.6129	0.257722
32.6312	0.300035
32.6496	0.313498
32.6679	0.334654
32.6862	0.288495
32.7046	0.307728
32.7229	0.255799
32.7413	0.282725
32.7596	0.278878
32.7779	0.284648
32.7963	0.230796
32.8146	0.253875
32.8329	0.284648
32.8513	0.267339
32.8696	0.240412
32.888	0.244259
32.9063	0.284648
32.9246	0.261569
32.943	0.244259
32.9613	0.246182
32.9796	0.211563
32.998	0.244259
33.0163	0.276955
33.0346	0.248106
33.053	0.294265
33.0713	0.259645
33.0897	0.267339
33.108	0.255799
33.1263	0.250029
33.1447	0.244259
33.163	0.228873
33.1813	0.242336
33.1997	0.225026
33.218	0.228873
33.2364	0.255799
33.2547	0.263492
33.273	0.255799
33.2914	0.236566
33.3097	0.236566
33.328	0.238489
33.3464	0.255799
33.3647	0.263492
33.383	0.265415
33.4014	0.269262
33.4197	0.223103
33.4381	0.219256
33.4564	0.253875
33.4747	0.265415
33.4931	0.242336
33.5114	0.234642
33.5297	0.221179
33.5481	0.236566
33.5664	0.238489
33.5848	0.219256
33.6031	0.236566
33.6214	0.232719
33.6398	0.219256
33.6581	0.253875
33.6764	0.242336
33.6948	0.290418
33.7131	0.257722
33.7314	0.282725
33.7498	0.275032
33.7681	0.244259
33.7865	0.238489
33.8048	0.200023
33.8231	0.236566
33.8415	0.236566
33.8598	0.244259
33.8781	0.240412
33.8965	0.205793
33.9148	0.265415
33.9332	0.255799
33.9515	0.236566
33.9698	0.236566
33.9882	0.215409
34.0065	0.207716
34.0248	0.255799
34.0432	0.246182
34.0615	0.234642
34.0798	0.263492
34.0982	0.251952
34.1165	0.228873
34.1349	0.240412
34.1532	0.248106
34.1715	0.240412
34.1899	0.244259
34.2082	0.223103
34.2265	0.246182
34.2449	0.188483
34.2632	0.240412
34.2816	0.263492
34.2999	0.259645
34.3182	0.238489
34.3366	0.217333
34.3549	0.261569
34.3732	0.20964
34.3916	0.251952
34.4099	0.20964
34.4282	0.226949
34.4466	0.253875
34.4649	0.226949
34.4833	0.238489
34.5016	0.261569
34.5199	0.205793
34.5383	0.238489
34.5566	0.259645
34.5749	0.259645
34.5933	0.261569
34.6116	0.242336
34.63	0.242336
34.6483	0.253875
34.6666	0.265415
34.685	0.267339
34.7033	0.230796
34.7216	0.261569
34.74	0.267339
34.7583	0.244259
34.7767	0.323114
34.795	0.294265
34.8133	0.278878
34.8317	0.334654
34.85	0.269262
34.8683	0.294265
34.8867	0.290418
34.905	0.294265
34.9233	0.275032
34.9417	0.309651
34.96	0.219256
34.9784	0.276955
34.9967	0.225026
35.015	0.232719
35.0334	0.263492
35.0517	0.261569
35.07	0.246182
35.0884	0.230796
35.1067	0.217333
35.1251	0.303881
35.1434	0.269262
35.1617	0.259645
35.1801	0.226949
35.1984	0.263492
35.2167	0.232719
35.2351	0.253875
35.2534	0.230796
35.2717	0.246182
35.2901	0.238489
35.3084	0.215409
35.3268	0.257722
35.3451	0.230796
35.3634	0.223103
35.3818	0.246182
35.4001	0.246182
35.4184	0.253875
35.4368	0.225026
35.4551	0.253875
35.4735	0.251952
35.4918	0.265415
35.5101	0.253875
35.5285	0.286572
35.5468	0.255799
35.5651	0.294265
35.5835	0.269262
35.6018	0.257722
35.6201	0.250029
35.6385	0.303881
35.6568	0.313498
35.6752	0.271185
35.6935	0.328884
35.7118	0.242336
35.7302	0.250029
35.7485	0.278878
35.7668	0.207716
35.7852	0.301958
35.8035	0.257722
35.8219	0.246182
35.8402	0.251952
35.8585	0.253875
35.8769	0.253875
35.8952	0.246182
35.9135	0.219256
35.9319	0.257722
35.9502	0.259645
35.9685	0.246182
35.9869	0.307728
36.0052	0.278878
36.0236	0.267339
36.0419	0.219256
36.0602	0.257722
36.0786	0.228873
36.0969	0.278878
36.1152	0.251952
36.1336	0.242336
36.1519	0.292341
36.1703	0.228873
36.1886	0.20964
36.2069	0.276955
36.2253	0.230796
36.2436	0.265415
36.2619	0.250029
36.2803	0.215409
36.2986	0.273108
36.317	0.246182
36.3353	0.225026
36.3536	0.251952
36.372	0.269262
36.3903	0.244259
36.4086	0.246182
36.427	0.232719
36.4453	0.244259
36.4636	0.263492
36.482	0.1981
36.5003	0.238489
36.5187	0.244259
36.537	0.255799
36.5553	0.251952
36.5737	0.265415
36.592	0.240412
36.6103	0.226949
36.6287	0.250029
36.647	0.230796
36.6654	0.323114
36.6837	0.261569
36.702	0.269262
36.7204	0.236566
36.7387	0.223103
36.757	0.248106
36.7754	0.213486
36.7937	0.263492
36.812	0.263492
36.8304	0.244259
36.8487	0.248106
36.8671	0.215409
36.8854	0.244259
36.9037	0.269262
36.9221	0.259645
36.9404	0.267339
36.9587	0.259645
36.9771	0.269262
36.9954	0.286572
37.0138	0.296188
37.0321	0.244259
37.0504	0.253875
37.0688	0.267339
37.0871	0.301958
37.1054	0.275032
37.1238	0.301958
37.1421	0.259645
37.1604	0.267339
37.1788	0.305805
37.1971	0.244259
37.2155	0.298111
37.2338	0.276955
37.2521	0.263492
37.2705	0.248106
37.2888	0.257722
37.3071	0.267339
37.3255	0.261569
37.3438	0.219256
37.3622	0.234642
37.3805	0.257722
37.3988	0.238489
37.4172	0.253875
37.4355	0.240412
37.4538	0.221179
37.4722	0.253875
37.4905	0.253875
37.5088	0.255799
37.5272	0.234642
37.5455	0.265415
37.5639	0.221179
37.5822	0.228873
37.6005	0.232719
37.6189	0.271185
37.6372	0.263492
37.6555	0.221179
37.6739	0.250029
37.6922	0.219256
37.7106	0.248106
37.7289	0.282725
37.7472	0.296188
37.7656	0.265415
37.7839	0.248106
37.8022	0.261569
37.8206	0.294265
37.8389	0.236566
37.8573	0.246182
37.8756	0.267339
37.8939	0.230796
37.9123	0.263492
37.9306	0.250029
37.9489	0.253875
37.9673	0.240412
37.9856	0.232719
38.0039	0.213486
38.0223	0.190407
38.0406	0.213486
38.059	0.248106
38.0773	0.253875
38.0956	0.246182
38.114	0.221179
38.1323	0.246182
38.1506	0.238489
38.169	0.253875
38.1873	0.230796
38.2057	0.205793
38.224	0.217333
38.2423	0.213486
38.2607	0.244259
38.279	0.219256
38.2973	0.221179
38.3157	0.257722
38.334	0.226949
38.3523	0.230796
38.3707	0.244259
38.389	0.253875
38.4074	0.251952
38.4257	0.275032
38.444	0.242336
38.4624	0.280802
38.4807	0.269262
38.499	0.253875
38.5174	0.228873
38.5357	0.261569
38.5541	0.230796
38.5724	0.286572
38.5907	0.251952
38.6091	0.242336
38.6274	0.267339
38.6457	0.303881
38.6641	0.238489
38.6824	0.261569
38.7007	0.226949
38.7191	0.213486
38.7374	0.232719
38.7558	0.244259
38.7741	0.225026
38.7924	0.226949
38.8108	0.19233
38.8291	0.248106
38.8474	0.19233
38.8658	0.194253
38.8841	0.234642
38.9025	0.226949
38.9208	0.230796
38.9391	0.211563
38.9575	0.196176
38.9758	0.219256
38.9941	0.230796
39.0125	0.236566
39.0308	0.19233
39.0491	0.238489
39.0675	0.223103
39.0858	0.201946
39.1042	0.228873
39.1225	0.213486
39.1408	0.244259
39.1592	0.211563
39.1775	0.1981
39.1958	0.207716
39.2142	0.211563
39.2325	0.188483
39.2509	0.219256
39.2692	0.171174
39.2875	0.219256
39.3059	0.246182
39.3242	0.226949
39.3425	0.225026
39.3609	0.253875
39.3792	0.207716
39.3975	0.232719
39.4159	0.234642
39.4342	0.205793
39.4526	0.20964
39.4709	0.207716
39.4892	0.201946
39.5076	0.217333
39.5259	0.200023
39.5442	0.246182
39.5626	0.228873
39.5809	0.221179
39.5993	0.219256
39.6176	0.238489
39.6359	0.242336
39.6543	0.215409
39.6726	0.213486
39.6909	0.217333
39.7093	0.18656
39.7276	0.207716
39.746	0.184637
39.7643	0.20964
39.7826	0.207716
39.801	0.200023
39.8193	0.230796
39.8376	0.194253
39.856	0.225026
39.8743	0.232719
39.8926	0.211563
39.911	0.228873
39.9293	0.238489
39.9477	0.246182
39.966	0.171174
39.9843	0.188483
40.0027	0.205793
40.021	0.213486
40.0393	0.215409
40.0577	0.205793
40.076	0.20964
40.0944	0.228873
40.1127	0.221179
40.131	0.20387
40.1494	0.230796
40.1677	0.200023
40.186	0.253875
40.2044	0.190407
40.2227	0.226949
40.241	0.225026
40.2594	0.211563
40.2777	0.205793
40.2961	0.223103
40.3144	0.205793
40.3327	0.207716
40.3511	0.1981
40.3694	0.234642
40.3877	0.228873
40.4061	0.278878
40.4244	0.232719
40.4428	0.211563
40.4611	0.20387
40.4794	0.236566
40.4978	0.236566
40.5161	0.215409
40.5344	0.184637
[truncated: 1,056 more rows]

## Sheet: Cooling 195 °C
2theta	Intensity
3.89731	1.4367
3.91565	1.37708
3.93399	1.51364
3.95232	1.41362
3.97066	1.39824
3.989	1.47325
4.00733	1.52902
4.02567	1.46363
4.04401	1.40208
4.06234	1.42709
4.08068	1.41555
4.09902	1.44824
4.11735	1.36747
4.13569	1.3867
4.15403	1.42132
4.17237	1.30784
4.1907	1.31169
4.20904	1.35016
4.22738	1.40401
4.24571	1.35208
4.26405	1.354
4.28239	1.32515
4.30072	1.354
4.31906	1.32131
4.3374	1.36939
4.35573	1.25591
4.37407	1.28476
4.39241	1.28284
4.41075	1.32708
4.42908	1.28861
4.44742	1.2963
4.46576	1.28476
4.48409	1.26361
4.50243	1.33862
4.52077	1.24053
4.5391	1.34823
4.55744	1.21745
4.57578	1.30977
4.59411	1.26168
4.61245	1.33477
4.63079	1.28284
4.64913	1.2963
4.66746	1.24822
4.6858	1.354
4.70414	1.2463
4.72247	1.21552
4.74081	1.28861
4.75915	1.2713
4.77748	1.20591
4.79582	1.26938
4.81416	1.23476
4.83249	1.304
4.85083	1.17898
4.86917	1.27899
4.8875	1.19822
4.90584	1.20591
4.92418	1.23091
4.94252	1.26938
4.96085	1.26745
4.97919	1.18091
4.99753	1.14629
5.01586	1.20783
5.0342	1.29053
5.05254	1.25014
5.07087	1.2136
5.08921	1.14821
5.10755	1.2136
5.12588	1.22706
5.14422	1.20591
5.16256	1.21745
5.1809	1.19052
5.19923	1.19822
5.21757	1.21745
5.23591	1.20783
5.25424	1.15398
5.27258	1.17706
5.29092	1.20591
5.30925	1.17514
5.32759	1.25399
5.34593	1.15206
5.36426	1.14629
5.3826	1.0982
5.40094	1.15783
5.41927	1.1636
5.43761	1.25014
5.45595	1.19052
5.47429	1.1886
5.49262	1.23091
5.51096	1.18475
5.5293	1.1886
5.54763	1.23476
5.56597	1.20783
5.58431	1.34823
5.60264	1.19245
5.62098	1.30977
5.63932	1.23283
5.65765	1.28284
5.67599	1.30015
5.69433	1.22129
5.71267	1.32708
5.731	1.44247
5.74934	1.39247
5.76768	1.38478
5.78601	1.29823
5.80435	1.4367
5.82269	1.35785
5.84102	1.42132
5.85936	1.44632
5.8777	1.44824
5.89603	1.45401
5.91437	1.51941
5.93271	1.46555
5.95104	1.55595
5.96938	1.63865
5.98772	1.7252
6.00606	1.66173
6.02439	1.77713
6.04273	1.76174
6.06107	1.75982
6.0794	1.91945
6.09774	1.89637
6.11608	1.98869
6.13441	2.06562
6.15275	2.08101
6.17109	2.11563
6.18942	2.18487
6.20776	2.27911
6.2261	2.4926
6.24444	2.53298
6.26277	2.60607
6.28111	2.73108
6.29945	2.84648
6.31778	2.99265
6.33612	3.17537
6.35446	3.16575
6.37279	3.38885
6.39113	3.54656
6.40947	3.95046
6.4278	4.11778
6.44614	4.13317
6.46448	4.67746
6.48282	4.89095
6.50115	5.28523
6.51949	5.28523
6.53783	5.99492
6.55616	6.21995
6.5745	6.62384
6.59284	7.16236
6.61117	7.81629
6.62951	8.1971
6.64785	8.99719
6.66618	9.30107
6.68452	10.3147
6.70286	11.1205
6.72119	12.1168
6.73953	13.0534
6.75787	14.3363
6.77621	15.6768
6.79454	17.1116
6.81288	18.9041
6.83122	20.8255
6.84955	22.4045
6.86789	24.5932
6.88623	26.9685
6.90456	29.2264
6.9229	32.8307
6.94124	36.008
6.95957	40.4585
6.97791	45.1918
6.99625	50.9155
7.01459	57.7913
7.03292	66.4981
7.05126	76.8512
7.0696	88.3717
7.08793	102.341
7.10627	117.908
7.12461	133.819
7.14294	148.55
7.16128	156.443
7.17962	149.762
7.19795	130.215
7.21629	103.506
7.23463	75.101
7.25296	51.0578
7.2713	35.2983
7.28964	26.3357
7.30798	20.2966
7.32631	16.9808
7.34465	14.9536
7.36299	14.5228
7.38132	13.9151
7.39966	14.0593
7.418	13.3881
7.43633	11.2032
7.45467	9.00104
7.47301	6.52191
7.49134	4.59284
7.50968	3.3023
7.52802	2.81186
7.54636	2.32334
7.56469	2.12332
7.58303	1.96176
7.60137	1.94638
7.6197	1.64442
7.63804	1.65981
7.65638	1.52518
7.67471	1.42901
7.69305	1.43093
7.71139	1.36554
7.72972	1.29246
7.74806	1.24437
7.7664	1.21745
7.78473	1.21937
7.80307	1.00781
7.82141	1.0982
7.83975	1.01935
7.85808	1.04435
7.87642	1.00012
7.89476	0.95588
7.91309	0.990499
7.93143	0.825095
7.94977	0.928953
7.9681	0.878948
7.98644	0.836635
8.00478	0.90395
8.02311	0.840482
8.04145	0.886641
8.05979	0.844328
8.07813	0.850098
8.09646	0.809709
8.1148	0.778936
8.13314	0.846251
8.15147	0.767396
8.16981	0.713544
8.18815	0.688541
8.20648	0.75201
8.22482	0.725084
8.24316	0.703927
8.26149	0.625072
8.27983	0.651998
8.29817	0.671231
8.3165	0.730854
8.33484	0.711621
8.35318	0.690464
8.37152	0.692388
8.38985	0.742393
8.40819	0.692388
8.42653	0.7347
8.44486	0.630842
8.4632	0.700081
8.48154	0.590453
8.49987	0.684694
8.51821	0.673155
8.53655	0.632765
8.55488	0.663538
8.57322	0.659691
8.59156	0.619302
8.6099	0.596223
8.62823	0.575066
8.64657	0.630842
8.66491	0.56545
8.68324	0.57699
8.70158	0.625072
8.71992	0.511597
8.73825	0.55968
8.75659	0.638535
8.77493	0.555833
8.79326	0.57122
8.8116	0.601993
8.82994	0.54814
8.84828	0.546217
8.86661	0.625072
8.88495	0.58276
8.90329	0.561603
8.92162	0.526984
8.93996	0.56545
8.9583	0.578913
8.97663	0.596223
8.99497	0.534677
9.01331	0.588529
9.03164	0.563527
9.04998	0.58276
9.06832	0.551987
9.08665	0.607762
9.10499	0.486595
9.12333	0.551987
9.14167	0.580836
9.16	0.526984
9.17834	0.532754
9.19668	0.588529
9.21501	0.592376
9.23335	0.528907
9.25169	0.515444
9.27002	0.534677
9.28836	0.482748
9.3067	0.496211
9.32503	0.475055
9.34337	0.53083
9.36171	0.490441
9.38005	0.534677
9.39838	0.523137
9.41672	0.480825
9.43506	0.540447
9.45339	0.532754
9.47173	0.503904
9.49007	0.473132
9.5084	0.505828
9.52674	0.5366
9.54508	0.513521
9.56341	0.448129
9.58175	0.448129
9.60009	0.492365
9.61842	0.415433
9.63676	0.484671
9.6551	0.486595
9.67344	0.484671
9.69177	0.490441
9.71011	0.467362
9.72845	0.492365
9.74678	0.442359
9.76512	0.421202
9.78346	0.490441
9.80179	0.446205
9.82013	0.496211
9.83847	0.475055
9.8568	0.463515
9.87514	0.505828
9.89348	0.421202
9.91182	0.461592
9.93015	0.432742
9.94849	0.488518
9.96683	0.442359
9.98516	0.428896
10.0035	0.425049
10.0218	0.473132
10.0402	0.446205
10.0585	0.473132
10.0768	0.444282
10.0952	0.38466
10.1135	0.500058
10.1319	0.394276
10.1502	0.473132
10.1685	0.413509
10.1869	0.432742
10.2052	0.428896
10.2235	0.453899
10.2419	0.425049
10.2602	0.428896
10.2786	0.471208
10.2969	0.461592
10.3152	0.442359
10.3336	0.494288
10.3519	0.446205
10.3702	0.488518
10.3886	0.469285
10.4069	0.475055
10.4252	0.440435
10.4436	0.471208
10.4619	0.38466
10.4803	0.448129
10.4986	0.448129
10.5169	0.403893
10.5353	0.407739
10.5536	0.401969
10.5719	0.513521
10.5903	0.394276
10.6086	0.453899
10.627	0.476978
10.6453	0.419279
10.6636	0.419279
10.682	0.451975
10.7003	0.442359
10.7186	0.465438
10.737	0.388506
10.7553	0.417356
10.7736	0.423126
10.792	0.400046
10.8103	0.446205
10.8287	0.421202
10.847	0.398123
10.8653	0.446205
10.8837	0.401969
10.902	0.434666
10.9203	0.505828
10.9387	0.469285
10.957	0.438512
10.9754	0.407739
10.9937	0.436589
11.012	0.400046
11.0304	0.407739
11.0487	0.415433
11.067	0.417356
11.0854	0.409663
11.1037	0.409663
11.1221	0.401969
11.1404	0.415433
11.1587	0.451975
11.1771	0.38466
11.1954	0.407739
11.2137	0.419279
11.2321	0.421202
11.2504	0.438512
11.2687	0.37889
11.2871	0.400046
11.3054	0.37312
11.3238	0.409663
11.3421	0.423126
11.3604	0.407739
11.3788	0.400046
11.3971	0.459668
11.4154	0.386583
11.4338	0.403893
11.4521	0.461592
11.4705	0.38466
11.4888	0.411586
11.5071	0.403893
11.5255	0.36735
11.5438	0.353887
11.5621	0.415433
11.5805	0.450052
11.5988	0.417356
11.6171	0.39043
11.6355	0.39043
11.6538	0.413509
11.6722	0.3962
11.6905	0.426972
11.7088	0.417356
11.7272	0.444282
11.7455	0.413509
11.7638	0.428896
11.7822	0.455822
11.8005	0.421202
11.8189	0.423126
11.8372	0.471208
11.8555	0.430819
11.8739	0.432742
11.8922	0.417356
11.9105	0.405816
11.9289	0.430819
11.9472	0.421202
11.9655	0.423126
11.9839	0.478901
12.0022	0.436589
12.0206	0.482748
12.0389	0.513521
12.0572	0.471208
12.0756	0.550063
12.0939	0.515444
12.1122	0.603916
12.1306	0.630842
12.1489	0.644305
12.1673	0.719314
12.1856	0.777013
12.2039	0.715467
12.2223	0.894334
12.2406	0.9328
12.2589	0.998192
12.2773	1.15975
12.2956	1.27322
12.3139	1.40016
12.3323	1.6098
12.3506	1.76751
12.369	2.14448
12.3873	2.05601
12.4056	2.14448
12.424	1.92138
12.4423	1.75213
12.4606	1.38093
12.479	1.10397
12.4973	0.877024
12.5157	0.719314
12.534	0.692388
12.5523	0.578913
12.5707	0.580836
12.589	0.517367
12.6073	0.573143
12.6257	0.501981
12.644	0.521214
12.6624	0.492365
12.6807	0.526984
12.699	0.484671
12.7174	0.486595
12.7357	0.423126
12.754	0.544294
12.7724	0.428896
12.7907	0.417356
12.809	0.461592
12.8274	0.413509
12.8457	0.376967
12.8641	0.392353
12.8824	0.469285
12.9007	0.434666
12.9191	0.421202
12.9374	0.465438
12.9557	0.425049
12.9741	0.375043
12.9924	0.375043
13.0108	0.394276
13.0291	0.363503
13.0474	0.371197
13.0658	0.398123
13.0841	0.363503
13.1024	0.398123
13.1208	0.348117
13.1391	0.398123
13.1574	0.371197
13.1758	0.407739
13.1941	0.330807
13.2125	0.37889
13.2308	0.419279
13.2491	0.38466
13.2675	0.37312
13.2858	0.342347
13.3041	0.415433
13.3225	0.398123
13.3408	0.423126
13.3592	0.359657
13.3775	0.380813
13.3958	0.357734
13.4142	0.365427
13.4325	0.388506
13.4508	0.365427
13.4692	0.35004
13.4875	0.371197
13.5058	0.357734
13.5242	0.37889
13.5425	0.451975
13.5609	0.382736
13.5792	0.380813
13.5975	0.35581
13.6159	0.315421
13.6342	0.363503
13.6525	0.35581
13.6709	0.340424
13.6892	0.38466
13.7076	0.39043
13.7259	0.301958
13.7442	0.37312
13.7626	0.409663
13.7809	0.375043
13.7992	0.380813
13.8176	0.392353
13.8359	0.453899
13.8542	0.394276
13.8726	0.39043
13.8909	0.403893
13.9093	0.363503
13.9276	0.392353
13.9459	0.411586
13.9643	0.363503
13.9826	0.338501
14.0009	0.428896
14.0193	0.37889
14.0376	0.39043
14.056	0.401969
14.0743	0.398123
14.0926	0.400046
14.111	0.467362
14.1293	0.471208
14.1476	0.419279
14.166	0.471208
14.1843	0.405816
14.2026	0.3962
14.221	0.442359
14.2393	0.496211
14.2577	0.440435
14.276	0.467362
14.2943	0.471208
14.3127	0.446205
14.331	0.544294
14.3493	0.469285
14.3677	0.403893
14.386	0.461592
14.4044	0.407739
14.4227	0.421202
14.441	0.403893
14.4594	0.3962
14.4777	0.375043
14.496	0.432742
14.5144	0.403893
14.5327	0.3962
14.5511	0.392353
14.5694	0.403893
14.5877	0.459668
14.6061	0.405816
14.6244	0.430819
14.6427	0.467362
14.6611	0.371197
14.6794	0.407739
14.6977	0.376967
14.7161	0.473132
14.7344	0.380813
14.7528	0.426972
14.7711	0.421202
14.7894	0.436589
14.8078	0.419279
14.8261	0.436589
14.8444	0.438512
14.8628	0.413509
14.8811	0.428896
14.8995	0.463515
14.9178	0.463515
14.9361	0.455822
14.9545	0.488518
14.9728	0.419279
14.9911	0.415433
15.0095	0.453899
15.0278	0.444282
15.0461	0.426972
15.0645	0.430819
15.0828	0.400046
15.1012	0.401969
15.1195	0.3962
15.1378	0.394276
15.1562	0.351964
15.1745	0.436589
15.1928	0.369273
15.2112	0.394276
15.2295	0.417356
15.2479	0.380813
15.2662	0.376967
15.2845	0.38466
15.3029	0.425049
15.3212	0.371197
15.3395	0.415433
15.3579	0.39043
15.3762	0.428896
15.3945	0.39043
15.4129	0.36735
15.4312	0.353887
15.4496	0.382736
15.4679	0.363503
15.4862	0.328884
15.5046	0.419279
15.5229	0.398123
15.5412	0.371197
15.5596	0.401969
15.5779	0.35581
15.5963	0.39043
15.6146	0.35581
15.6329	0.37889
15.6513	0.38466
15.6696	0.365427
15.6879	0.380813
15.7063	0.400046
15.7246	0.392353
15.7429	0.444282
15.7613	0.423126
15.7796	0.417356
15.798	0.3962
15.8163	0.398123
15.8346	0.398123
15.853	0.388506
15.8713	0.359657
15.8896	0.436589
15.908	0.35581
15.9263	0.411586
15.9447	0.425049
15.963	0.38466
15.9813	0.400046
15.9997	0.375043
16.018	0.357734
16.0363	0.386583
16.0547	0.419279
16.073	0.405816
16.0914	0.37889
16.1097	0.375043
16.128	0.428896
16.1464	0.446205
16.1647	0.376967
16.183	0.426972
16.2014	0.35581
16.2197	0.348117
16.238	0.440435
16.2564	0.419279
16.2747	0.421202
16.2931	0.365427
16.3114	0.463515
16.3297	0.421202
16.3481	0.398123
16.3664	0.400046
16.3847	0.388506
16.4031	0.401969
16.4214	0.446205
16.4398	0.392353
16.4581	0.455822
16.4764	0.400046
16.4948	0.490441
16.5131	0.407739
16.5314	0.426972
16.5498	0.37312
16.5681	0.403893
16.5864	0.407739
16.6048	0.426972
16.6231	0.438512
16.6415	0.438512
16.6598	0.413509
16.6781	0.311574
16.6965	0.442359
16.7148	0.398123
16.7331	0.453899
16.7515	0.37889
16.7698	0.394276
16.7882	0.400046
16.8065	0.419279
16.8248	0.37312
16.8432	0.398123
16.8615	0.492365
16.8798	0.432742
16.8982	0.401969
16.9165	0.440435
16.9348	0.400046
16.9532	0.461592
16.9715	0.457745
16.9899	0.457745
17.0082	0.446205
17.0265	0.438512
17.0449	0.467362
17.0632	0.473132
17.0815	0.498134
17.0999	0.459668
17.1182	0.394276
17.1366	0.467362
17.1549	0.457745
17.1732	0.478901
17.1916	0.480825
17.2099	0.426972
17.2282	0.461592
17.2466	0.515444
17.2649	0.471208
17.2832	0.478901
17.3016	0.482748
17.3199	0.469285
17.3383	0.461592
17.3566	0.484671
17.3749	0.507751
17.3933	0.465438
17.4116	0.511597
17.4299	0.492365
17.4483	0.484671
17.4666	0.501981
17.485	0.525061
17.5033	0.503904
17.5216	0.523137
17.54	0.54237
17.5583	0.567373
17.5766	0.540447
17.595	0.584683
17.6133	0.550063
17.6316	0.580836
17.65	0.617379
17.6683	0.609686
17.6867	0.592376
17.705	0.653922
17.7233	0.644305
17.7417	0.644305
17.76	0.742393
17.7783	0.696234
17.7967	0.71739
17.815	0.682771
17.8334	0.690464
17.8517	0.682771
17.87	0.657768
17.8884	0.669308
17.9067	0.644305
17.925	0.650075
17.9434	0.753933
17.9617	0.736623
17.9801	0.852021
17.9984	0.971266
18.0167	0.902027
18.0351	0.90972
18.0534	0.888564
18.0717	0.892411
18.0901	0.842405
18.1084	0.825095
18.1267	0.777013
18.1451	0.680848
18.1634	0.663538
18.1818	0.603916
18.2001	0.617379
18.2184	0.544294
18.2368	0.58276
18.2551	0.563527
18.2734	0.590453
18.2918	0.519291
18.3101	0.555833
18.3285	0.55968
18.3468	0.600069
18.3651	0.521214
18.3835	0.525061
18.4018	0.544294
18.4201	0.526984
18.4385	0.57699
18.4568	0.55391
18.4751	0.523137
18.4935	0.526984
18.5118	0.532754
18.5302	0.517367
18.5485	0.53083
18.5668	0.557757
18.5852	0.5366
18.6035	0.503904
18.6218	0.609686
18.6402	0.563527
18.6585	0.634689
18.6769	0.621226
18.6952	0.603916
18.7135	0.521214
18.7319	0.586606
18.7502	0.630842
18.7685	0.659691
18.7869	0.707774
18.8052	0.711621
18.8235	0.830865
18.8419	0.830865
18.8602	0.973189
18.8786	1.05397
18.8969	1.17321
18.9152	1.35977
18.9336	1.49825
18.9519	1.58672
18.9702	1.69058
18.9886	1.65404
19.0069	1.74059
19.0253	1.66942
19.0436	1.46555
19.0619	1.34439
19.0803	1.15975
19.0986	1.13859
19.1169	1.04435
19.1353	1.06358
19.1536	1.03089
19.1719	1.02704
19.1903	1.01935
19.2086	1.03666
19.227	1.03281
19.2453	1.20206
19.2636	1.15398
19.282	1.23668
19.3003	1.14436
19.3186	1.14052
19.337	1.07128
19.3553	1.07128
19.3737	1.08666
19.392	0.998192
19.4103	1.03473
19.4287	0.907797
19.447	0.911644
19.4653	0.882794
19.4837	0.905874
19.502	0.755856
19.5204	0.759703
19.5387	0.803939
19.557	0.711621
19.5754	0.725084
19.5937	0.705851
19.612	0.640459
19.6304	0.661615
19.6487	0.646228
19.667	0.661615
19.6854	0.634689
19.7037	0.638535
19.7221	0.623149
19.7404	0.590453
19.7587	0.607762
19.7771	0.544294
19.7954	0.578913
19.8137	0.58276
19.8321	0.594299
19.8504	0.584683
19.8688	0.511597
19.8871	0.596223
19.9054	0.55968
19.9238	0.567373
19.9421	0.588529
19.9604	0.569296
19.9788	0.521214
19.9971	0.550063
20.0154	0.567373
20.0338	0.55968
20.0521	0.573143
20.0705	0.623149
20.0888	0.644305
20.1071	0.586606
20.1255	0.521214
20.1438	0.594299
20.1621	0.594299
20.1805	0.575066
20.1988	0.625072
20.2172	0.642382
20.2355	0.534677
20.2538	0.575066
20.2722	0.584683
20.2905	0.613532
20.3088	0.617379
20.3272	0.615456
20.3455	0.659691
20.3638	0.655845
20.3822	0.617379
20.4005	0.661615
20.4189	0.655845
20.4372	0.669308
20.4555	0.671231
20.4739	0.72316
20.4922	0.705851
20.5105	0.702004
20.5289	0.725084
20.5472	0.653922
20.5656	0.684694
20.5839	0.705851
20.6022	0.705851
20.6206	0.628919
20.6389	0.684694
20.6572	0.636612
20.6756	0.684694
20.6939	0.677001
20.7122	0.626995
20.7306	0.634689
20.7489	0.694311
20.7673	0.632765
20.7856	0.640459
20.8039	0.653922
20.8223	0.713544
20.8406	0.653922
20.8589	0.694311
20.8773	0.686618
20.8956	0.750087
20.914	0.707774
20.9323	0.653922
20.9506	0.719314
20.969	0.76932
20.9873	0.732777
21.0056	0.750087
21.024	0.75778
21.0423	0.790476
21.0607	0.832788
21.079	0.907797
21.0973	0.925107
21.1157	1.01166
21.134	1.09436
21.1523	1.17898
21.1707	1.25784
21.189	1.33477
21.2073	1.47709
21.2257	1.60403
21.244	1.75405
21.2624	1.89445
21.2807	1.97523
21.299	1.93292
21.3174	2.04831
21.3357	1.96369
21.354	1.95407
21.3724	1.82329
21.3907	1.70212
21.4091	1.55018
21.4274	1.40593
21.4457	1.2963
21.4641	1.27899
21.4824	1.15013
21.5007	1.05397
21.5191	1.12705
21.5374	1.03473
21.5557	1.02512
21.5741	1.00396
21.5924	0.990499
21.6108	0.953956
21.6291	0.828942
21.6474	0.784706
21.6658	0.75201
21.6841	0.773166
21.7024	0.686618
21.7208	0.613532
21.7391	0.640459
21.7575	0.655845
21.7758	0.667385
21.7941	0.596223
21.8125	0.653922
21.8308	0.580836
21.8491	0.615456
21.8675	0.623149
21.8858	0.621226
21.9041	0.690464
21.9225	0.580836
21.9408	0.655845
21.9592	0.613532
21.9775	0.638535
21.9958	0.623149
22.0142	0.623149
22.0325	0.698157
22.0508	0.625072
22.0692	0.630842
22.0875	0.661615
22.1059	0.557757
22.1242	0.648152
22.1425	0.609686
22.1609	0.596223
22.1792	0.667385
22.1975	0.563527
22.2159	0.646228
22.2342	0.682771
22.2525	0.607762
22.2709	0.609686
22.2892	0.642382
22.3076	0.630842
22.3259	0.642382
22.3442	0.580836
22.3626	0.636612
22.3809	0.663538
22.3992	0.632765
22.4176	0.594299
22.4359	0.615456
22.4543	0.609686
22.4726	0.54237
22.4909	0.648152
22.5093	0.638535
22.5276	0.569296
22.5459	0.600069
22.5643	0.711621
22.5826	0.613532
22.6009	0.673155
22.6193	0.657768
22.6376	0.732777
22.656	0.707774
22.6743	0.657768
22.6926	0.669308
22.711	0.715467
22.7293	0.703927
22.7476	0.771243
22.766	0.857791
22.7843	0.792399
22.8027	0.888564
22.821	0.884717
22.8393	0.90972
22.8577	0.884717
22.876	0.980882
22.8943	0.998192
22.9127	1.06935
22.931	0.982806
22.9494	0.94434
22.9677	0.930877
22.986	0.940493
23.0044	0.838558
23.0227	0.782783
23.041	0.817402
23.0594	0.71739
23.0777	0.71739
23.096	0.74047
23.1144	0.736623
23.1327	0.680848
23.1511	0.626995
23.1694	0.594299
23.1877	0.700081
23.2061	0.661615
23.2244	0.573143
23.2427	0.594299
23.2611	0.671231
23.2794	0.667385
23.2978	0.619302
23.3161	0.605839
23.3344	0.686618
23.3528	0.613532
23.3711	0.594299
23.3894	0.598146
23.4078	0.557757
23.4261	0.617379
23.4444	0.615456
23.4628	0.619302
23.4811	0.617379
23.4995	0.567373
23.5178	0.557757
23.5361	0.592376
23.5545	0.54237
23.5728	0.567373
23.5911	0.600069
23.6095	0.575066
23.6278	0.58276
23.6462	0.557757
23.6645	0.550063
23.6828	0.584683
23.7012	0.555833
23.7195	0.580836
23.7378	0.54814
23.7562	0.603916
23.7745	0.551987
23.7928	0.55968
23.8112	0.623149
23.8295	0.642382
23.8479	0.640459
23.8662	0.528907
23.8845	0.621226
23.9029	0.644305
23.9212	0.677001
23.9395	0.661615
23.9579	0.605839
23.9762	0.74047
23.9946	0.771243
24.0129	0.713544
24.0312	0.807786
24.0496	0.76355
24.0679	0.778936
24.0862	0.74624
24.1046	0.707774
24.1229	0.690464
24.1412	0.727007
24.1596	0.651998
24.1779	0.765473
24.1963	0.605839
24.2146	0.601993
24.2329	0.603916
24.2513	0.659691
24.2696	0.57122
24.2879	0.584683
24.3063	0.592376
24.3246	0.573143
24.343	0.56545
24.3613	0.538524
24.3796	0.594299
24.398	0.601993
24.4163	0.561603
24.4346	0.53083
24.453	0.578913
24.4713	0.57122
24.4897	0.53083
24.508	0.598146
24.5263	0.588529
24.5447	0.590453
24.563	0.563527
24.5813	0.598146
24.5997	0.532754
24.618	0.550063
24.6363	0.55391
24.6547	0.588529
24.673	0.605839
24.6914	0.611609
24.7097	0.575066
24.728	0.55968
24.7464	0.561603
24.7647	0.634689
24.783	0.573143
24.8014	0.613532
24.8197	0.611609
24.8381	0.698157
24.8564	0.601993
24.8747	0.667385
24.8931	0.690464
24.9114	0.727007
24.9297	0.7347
24.9481	0.809709
24.9664	0.727007
24.9847	0.819325
25.0031	0.796246
25.0214	0.821249
25.0398	0.880871
25.0581	0.852021
25.0764	0.940493
25.0948	0.969343
25.1131	0.892411
25.1314	0.850098
25.1498	0.755856
25.1681	0.786629
25.1865	0.698157
25.2048	0.650075
25.2231	0.702004
25.2415	0.653922
25.2598	0.715467
25.2781	0.646228
25.2965	0.557757
25.3148	0.588529
25.3331	0.584683
25.3515	0.550063
25.3698	0.600069
25.3882	0.503904
25.4065	0.584683
25.4248	0.513521
25.4432	0.5366
25.4615	0.57122
25.4798	0.540447
25.4982	0.517367
25.5165	0.53083
25.5349	0.563527
25.5532	0.5366
25.5715	0.601993
25.5899	0.598146
25.6082	0.501981
25.6265	0.525061
25.6449	0.525061
25.6632	0.503904
25.6815	0.53083
25.6999	0.557757
25.7182	0.501981
25.7366	0.534677
25.7549	0.486595
25.7732	0.532754
25.7916	0.526984
25.8099	0.550063
25.8282	0.540447
25.8466	0.480825
25.8649	0.463515
25.8833	0.488518
25.9016	0.469285
25.9199	0.486595
25.9383	0.505828
25.9566	0.455822
25.9749	0.448129
25.9933	0.526984
26.0116	0.438512
26.0299	0.471208
26.0483	0.405816
26.0666	0.496211
26.085	0.444282
26.1033	0.453899
26.1216	0.426972
26.14	0.411586
26.1583	0.430819
26.1766	0.451975
26.195	0.394276
26.2133	0.444282
26.2317	0.38466
26.25	0.446205
26.2683	0.357734
26.2867	0.425049
26.305	0.434666
26.3233	0.423126
26.3417	0.413509
26.36	0.451975
26.3784	0.434666
26.3967	0.394276
26.415	0.448129
26.4334	0.430819
26.4517	0.484671
26.47	0.382736
26.4884	0.451975
26.5067	0.382736
26.525	0.415433
26.5434	0.465438
26.5617	0.465438
26.5801	0.426972
26.5984	0.380813
26.6167	0.425049
26.6351	0.423126
26.6534	0.365427
26.6717	0.400046
26.6901	0.409663
26.7084	0.440435
26.7268	0.523137
26.7451	0.471208
26.7634	0.501981
26.7818	0.471208
26.8001	0.480825
26.8184	0.419279
26.8368	0.457745
26.8551	0.465438
26.8734	0.432742
26.8918	0.467362
26.9101	0.419279
26.9285	0.482748
26.9468	0.438512
26.9651	0.401969
26.9835	0.438512
27.0018	0.478901
27.0201	0.519291
27.0385	0.507751
27.0568	0.498134
27.0752	0.525061
27.0935	0.496211
27.1118	0.532754
27.1302	0.505828
27.1485	0.555833
27.1668	0.55391
27.1852	0.55391
27.2035	0.561603
27.2218	0.503904
27.2402	0.519291
27.2585	0.434666
27.2769	0.503904
27.2952	0.486595
27.3135	0.488518
27.3319	0.440435
27.3502	0.444282
27.3685	0.463515
27.3869	0.419279
27.4052	0.400046
27.4236	0.455822
27.4419	0.388506
27.4602	0.423126
27.4786	0.467362
27.4969	0.421202
27.5152	0.409663
27.5336	0.423126
27.5519	0.401969
27.5702	0.409663
27.5886	0.446205
27.6069	0.440435
27.6253	0.411586
27.6436	0.421202
27.6619	0.471208
27.6803	0.444282
27.6986	0.453899
27.7169	0.413509
27.7353	0.451975
27.7536	0.425049
27.772	0.411586
27.7903	0.394276
27.8086	0.428896
27.827	0.411586
27.8453	0.421202
27.8636	0.425049
27.882	0.438512
27.9003	0.421202
27.9187	0.403893
27.937	0.38466
27.9553	0.3962
27.9737	0.376967
27.992	0.382736
28.0103	0.38466
28.0287	0.311574
28.047	0.340424
28.0653	0.386583
28.0837	0.353887
28.102	0.359657
28.1204	0.36735
28.1387	0.388506
28.157	0.34427
28.1754	0.37312
28.1937	0.388506
28.212	0.353887
28.2304	0.35581
28.2487	0.36735
28.2671	0.334654
28.2854	0.407739
28.3037	0.386583
28.3221	0.407739
28.3404	0.36158
28.3587	0.307728
28.3771	0.34427
28.3954	0.392353
28.4137	0.35581
28.4321	0.357734
28.4504	0.376967
28.4688	0.382736
28.4871	0.328884
28.5054	0.388506
28.5238	0.375043
28.5421	0.415433
28.5604	0.35581
28.5788	0.386583
28.5971	0.432742
28.6155	0.403893
28.6338	0.415433
28.6521	0.419279
28.6705	0.440435
28.6888	0.494288
28.7071	0.37889
28.7255	0.434666
28.7438	0.440435
28.7621	0.505828
28.7805	0.451975
28.7988	0.442359
28.8172	0.482748
28.8355	0.463515
28.8538	0.519291
28.8722	0.476978
28.8905	0.555833
28.9088	0.519291
28.9272	0.557757
28.9455	0.56545
28.9639	0.621226
28.9822	0.615456
29.0005	0.698157
29.0189	0.621226
29.0372	0.596223
29.0555	0.659691
29.0739	0.625072
29.0922	0.526984
29.1105	0.550063
29.1289	0.544294
29.1472	0.515444
29.1656	0.505828
29.1839	0.476978
29.2022	0.398123
29.2206	0.434666
29.2389	0.394276
29.2572	0.417356
29.2756	0.398123
29.2939	0.340424
29.3123	0.423126
29.3306	0.405816
29.3489	0.380813
29.3673	0.35004
29.3856	0.37889
29.4039	0.371197
29.4223	0.346194
29.4406	0.334654
29.459	0.388506
29.4773	0.398123
29.4956	0.323114
29.514	0.35581
29.5323	0.330807
29.5506	0.386583
29.569	0.403893
29.5873	0.357734
29.6056	0.325038
29.624	0.359657
29.6423	0.35581
29.6607	0.36735
29.679	0.35581
29.6973	0.35581
29.7157	0.369273
29.734	0.334654
29.7523	0.311574
29.7707	0.359657
29.789	0.365427
29.8074	0.307728
29.8257	0.296188
29.844	0.35581
29.8624	0.336577
29.8807	0.319268
29.899	0.326961
29.9174	0.338501
29.9357	0.305805
29.954	0.319268
29.9724	0.315421
29.9907	0.315421
30.0091	0.305805
30.0274	0.323114
30.0457	0.315421
30.0641	0.315421
30.0824	0.319268
30.1007	0.325038
30.1191	0.311574
30.1374	0.325038
30.1558	0.278878
30.1741	0.307728
30.1924	0.36158
30.2108	0.34427
30.2291	0.288495
30.2474	0.323114
30.2658	0.290418
30.2841	0.275032
30.3024	0.284648
30.3208	0.34427
30.3391	0.334654
30.3575	0.321191
30.3758	0.332731
30.3941	0.282725
30.4125	0.315421
30.4308	0.298111
30.4491	0.305805
30.4675	0.353887
30.4858	0.301958
30.5042	0.336577
30.5225	0.34427
30.5408	0.375043
30.5592	0.319268
30.5775	0.326961
30.5958	0.340424
30.6142	0.346194
30.6325	0.375043
30.6508	0.353887
30.6692	0.376967
30.6875	0.365427
30.7059	0.417356
30.7242	0.332731
30.7425	0.386583
30.7609	0.405816
30.7792	0.405816
30.7975	0.411586
30.8159	0.430819
30.8342	0.407739
30.8526	0.380813
30.8709	0.321191
30.8892	0.346194
30.9076	0.348117
30.9259	0.380813
30.9442	0.351964
30.9626	0.323114
30.9809	0.309651
30.9992	0.336577
31.0176	0.303881
31.0359	0.332731
31.0543	0.313498
31.0726	0.278878
31.0909	0.342347
31.1093	0.286572
31.1276	0.321191
31.1459	0.323114
31.1643	0.328884
31.1826	0.301958
31.201	0.348117
31.2193	0.298111
31.2376	0.286572
31.256	0.313498
31.2743	0.311574
31.2926	0.296188
31.311	0.282725
31.3293	0.294265
31.3477	0.326961
31.366	0.35004
31.3843	0.365427
31.4027	0.323114
31.421	0.313498
31.4393	0.371197
31.4577	0.309651
31.476	0.338501
31.4943	0.380813
31.5127	0.338501
31.531	0.363503
31.5494	0.35581
31.5677	0.419279
31.586	0.342347
31.6044	0.413509
31.6227	0.398123
31.641	0.386583
31.6594	0.392353
31.6777	0.398123
31.6961	0.326961
31.7144	0.313498
31.7327	0.37312
31.7511	0.37312
31.7694	0.319268
31.7877	0.386583
31.8061	0.317344
31.8244	0.292341
31.8427	0.35004
31.8611	0.288495
31.8794	0.332731
31.8978	0.303881
31.9161	0.301958
31.9344	0.300035
31.9528	0.288495
31.9711	0.275032
31.9894	0.303881
32.0078	0.238489
32.0261	0.269262
32.0445	0.267339
32.0628	0.278878
32.0811	0.296188
32.0995	0.250029
32.1178	0.275032
32.1361	0.276955
32.1545	0.200023
32.1728	0.234642
32.1911	0.292341
32.2095	0.242336
32.2278	0.303881
32.2462	0.284648
32.2645	0.288495
32.2828	0.292341
32.3012	0.273108
32.3195	0.253875
32.3378	0.265415
32.3562	0.234642
32.3745	0.273108
32.3929	0.282725
32.4112	0.251952
32.4295	0.267339
32.4479	0.288495
32.4662	0.311574
32.4845	0.259645
32.5029	0.321191
32.5212	0.300035
32.5395	0.334654
32.5579	0.263492
32.5762	0.313498
32.5946	0.296188
32.6129	0.311574
32.6312	0.294265
32.6496	0.311574
32.6679	0.294265
32.6862	0.305805
32.7046	0.278878
32.7229	0.296188
32.7413	0.271185
32.7596	0.251952
32.7779	0.280802
32.7963	0.261569
32.8146	0.242336
32.8329	0.259645
32.8513	0.294265
32.8696	0.253875
32.888	0.196176
32.9063	0.298111
32.9246	0.261569
32.943	0.307728
32.9613	0.225026
32.9796	0.278878
32.998	0.246182
33.0163	0.288495
33.0346	0.261569
33.053	0.234642
33.0713	0.261569
33.0897	0.267339
33.108	0.215409
33.1263	0.230796
33.1447	0.253875
33.163	0.234642
33.1813	0.251952
33.1997	0.238489
33.218	0.225026
33.2364	0.215409
33.2547	0.207716
33.273	0.234642
33.2914	0.217333
33.3097	0.292341
33.328	0.251952
33.3464	0.248106
33.3647	0.238489
33.383	0.234642
33.4014	0.236566
33.4197	0.273108
33.4381	0.215409
33.4564	0.223103
33.4747	0.261569
33.4931	0.288495
33.5114	0.215409
33.5297	0.213486
33.5481	0.228873
33.5664	0.221179
33.5848	0.244259
33.6031	0.215409
33.6214	0.236566
33.6398	0.226949
33.6581	0.211563
33.6764	0.278878
33.6948	0.240412
33.7131	0.228873
33.7314	0.228873
33.7498	0.253875
33.7681	0.219256
33.7865	0.228873
33.8048	0.255799
33.8231	0.275032
33.8415	0.232719
33.8598	0.230796
33.8781	0.228873
33.8965	0.244259
33.9148	0.207716
33.9332	0.232719
33.9515	0.246182
33.9698	0.221179
33.9882	0.188483
34.0065	0.211563
34.0248	0.201946
34.0432	0.240412
34.0615	0.236566
34.0798	0.259645
34.0982	0.278878
34.1165	0.267339
34.1349	0.246182
34.1532	0.217333
34.1715	0.215409
34.1899	0.213486
34.2082	0.288495
34.2265	0.248106
34.2449	0.219256
34.2632	0.240412
34.2816	0.20964
34.2999	0.261569
34.3182	0.225026
34.3366	0.265415
34.3549	0.273108
34.3732	0.228873
34.3916	0.240412
34.4099	0.219256
34.4282	0.228873
34.4466	0.250029
34.4649	0.263492
34.4833	0.215409
34.5016	0.238489
34.5199	0.211563
34.5383	0.230796
34.5566	0.219256
34.5749	0.261569
34.5933	0.275032
34.6116	0.228873
34.63	0.242336
34.6483	0.261569
34.6666	0.219256
34.685	0.238489
34.7033	0.273108
34.7216	0.284648
34.74	0.271185
34.7583	0.246182
34.7767	0.267339
34.795	0.259645
34.8133	0.248106
34.8317	0.309651
34.85	0.276955
34.8683	0.265415
34.8867	0.242336
34.905	0.294265
34.9233	0.325038
34.9417	0.311574
34.96	0.259645
34.9784	0.269262
34.9967	0.298111
35.015	0.271185
35.0334	0.273108
35.0517	0.253875
35.07	0.248106
35.0884	0.248106
35.1067	0.296188
35.1251	0.250029
35.1434	0.267339
35.1617	0.275032
35.1801	0.213486
35.1984	0.246182
35.2167	0.263492
35.2351	0.251952
35.2534	0.269262
35.2717	0.267339
35.2901	0.223103
35.3084	0.244259
35.3268	0.236566
35.3451	0.301958
35.3634	0.242336
35.3818	0.282725
35.4001	0.267339
35.4184	0.259645
35.4368	0.226949
35.4551	0.288495
35.4735	0.207716
35.4918	0.255799
35.5101	0.278878
35.5285	0.282725
35.5468	0.257722
35.5651	0.276955
35.5835	0.288495
35.6018	0.313498
35.6201	0.269262
35.6385	0.282725
35.6568	0.267339
35.6752	0.296188
35.6935	0.284648
35.7118	0.276955
35.7302	0.303881
35.7485	0.273108
35.7668	0.278878
35.7852	0.253875
35.8035	0.253875
35.8219	0.248106
35.8402	0.228873
35.8585	0.248106
35.8769	0.234642
35.8952	0.242336
35.9135	0.263492
35.9319	0.200023
35.9502	0.240412
35.9685	0.257722
35.9869	0.232719
36.0052	0.282725
36.0236	0.228873
36.0419	0.246182
36.0602	0.236566
36.0786	0.292341
36.0969	0.226949
36.1152	0.230796
36.1336	0.242336
36.1519	0.282725
36.1703	0.242336
36.1886	0.267339
36.2069	0.263492
36.2253	0.244259
36.2436	0.228873
36.2619	0.232719
36.2803	0.244259
36.2986	0.234642
36.317	0.275032
36.3353	0.255799
36.3536	0.265415
36.372	0.251952
36.3903	0.219256
36.4086	0.223103
36.427	0.236566
36.4453	0.263492
36.4636	0.242336
36.482	0.228873
36.5003	0.234642
36.5187	0.230796
36.537	0.217333
36.5553	0.269262
36.5737	0.248106
36.592	0.242336
36.6103	0.230796
36.6287	0.259645
36.647	0.257722
36.6654	0.271185
36.6837	0.276955
36.702	0.213486
36.7204	0.248106
36.7387	0.225026
36.757	0.309651
36.7754	0.240412
36.7937	0.263492
36.812	0.250029
36.8304	0.282725
36.8487	0.267339
36.8671	0.234642
36.8854	0.288495
36.9037	0.217333
36.9221	0.238489
36.9404	0.246182
36.9587	0.253875
36.9771	0.301958
36.9954	0.284648
37.0138	0.253875
37.0321	0.255799
37.0504	0.269262
37.0688	0.301958
37.0871	0.284648
37.1054	0.286572
37.1238	0.286572
37.1421	0.298111
37.1604	0.326961
37.1788	0.263492
37.1971	0.288495
37.2155	0.267339
37.2338	0.300035
37.2521	0.275032
37.2705	0.286572
37.2888	0.263492
37.3071	0.217333
37.3255	0.259645
37.3438	0.271185
37.3622	0.261569
37.3805	0.276955
37.3988	0.257722
37.4172	0.238489
37.4355	0.232719
37.4538	0.215409
37.4722	0.250029
37.4905	0.242336
37.5088	0.271185
37.5272	0.286572
37.5455	0.282725
37.5639	0.232719
37.5822	0.275032
37.6005	0.261569
37.6189	0.246182
37.6372	0.250029
37.6555	0.246182
37.6739	0.238489
37.6922	0.305805
37.7106	0.1981
37.7289	0.248106
37.7472	0.234642
37.7656	0.284648
37.7839	0.232719
37.8022	0.278878
37.8206	0.276955
37.8389	0.263492
37.8573	0.273108
37.8756	0.271185
37.8939	0.242336
37.9123	0.242336
37.9306	0.288495
37.9489	0.253875
37.9673	0.230796
37.9856	0.228873
38.0039	0.219256
38.0223	0.215409
38.0406	0.20387
38.059	0.225026
38.0773	0.225026
38.0956	0.250029
38.114	0.244259
38.1323	0.219256
38.1506	0.250029
38.169	0.269262
38.1873	0.230796
38.2057	0.240412
38.224	0.221179
38.2423	0.226949
38.2607	0.265415
38.279	0.280802
38.2973	0.244259
38.3157	0.196176
38.334	0.238489
38.3523	0.194253
38.3707	0.228873
38.389	0.242336
38.4074	0.217333
38.4257	0.269262
38.444	0.215409
38.4624	0.207716
38.4807	0.257722
38.499	0.267339
38.5174	0.246182
38.5357	0.300035
38.5541	0.232719
38.5724	0.294265
38.5907	0.263492
38.6091	0.288495
38.6274	0.230796
38.6457	0.211563
38.6641	0.253875
38.6824	0.20964
38.7007	0.226949
38.7191	0.234642
38.7374	0.267339
38.7558	0.236566
38.7741	0.236566
38.7924	0.238489
38.8108	0.225026
38.8291	0.276955
38.8474	0.259645
38.8658	0.228873
38.8841	0.207716
38.9025	0.250029
38.9208	0.232719
38.9391	0.200023
38.9575	0.171174
38.9758	0.234642
38.9941	0.253875
39.0125	0.257722
39.0308	0.255799
39.0491	0.184637
39.0675	0.228873
39.0858	0.253875
39.1042	0.226949
39.1225	0.223103
39.1408	0.200023
39.1592	0.226949
39.1775	0.219256
39.1958	0.232719
39.2142	0.20387
39.2325	0.221179
39.2509	0.230796
39.2692	0.236566
39.2875	0.226949
39.3059	0.238489
39.3242	0.236566
39.3425	0.240412
39.3609	0.230796
39.3792	0.205793
39.3975	0.20964
39.4159	0.259645
39.4342	0.171174
39.4526	0.251952
39.4709	0.221179
39.4892	0.205793
39.5076	0.184637
39.5259	0.234642
39.5442	0.196176
39.5626	0.215409
39.5809	0.201946
39.5993	0.205793
39.6176	0.20387
39.6359	0.165404
39.6543	0.221179
39.6726	0.242336
39.6909	0.215409
39.7093	0.196176
39.7276	0.1981
39.746	0.221179
39.7643	0.261569
39.7826	0.232719
39.801	0.250029
39.8193	0.217333
39.8376	0.232719
39.856	0.238489
39.8743	0.20964
39.8926	0.1981
39.911	0.194253
39.9293	0.211563
39.9477	0.211563
39.966	0.263492
39.9843	0.211563
40.0027	0.20387
40.021	0.205793
40.0393	0.20964
40.0577	0.205793
40.076	0.232719
40.0944	0.20964
40.1127	0.228873
40.131	0.205793
40.1494	0.232719
40.1677	0.219256
40.186	0.17502
40.2044	0.171174
40.2227	0.194253
40.241	0.213486
40.2594	0.182713
40.2777	0.250029
40.2961	0.190407
40.3144	0.226949
40.3327	0.205793
40.3511	0.217333
40.3694	0.255799
40.3877	0.213486
40.4061	0.16925
40.4244	0.190407
40.4428	0.225026
40.4611	0.223103
40.4794	0.238489
40.4978	0.194253
40.5161	0.230796
40.5344	0.217333
[truncated: 1,056 more rows]

## Sheet: Cooling 185 °C
2theta	Intensity
3.89731	1.51748
3.91565	1.40785
3.93399	1.39055
3.95232	1.49056
3.97066	1.39247
3.989	1.44247
4.00733	1.40208
4.02567	1.42132
4.04401	1.35785
4.06234	1.47902
4.08068	1.42709
4.09902	1.36939
4.11735	1.37131
4.13569	1.39055
4.15403	1.32323
4.17237	1.31361
4.1907	1.37324
4.20904	1.40593
4.22738	1.37708
4.24571	1.37708
4.26405	1.34631
4.28239	1.304
4.30072	1.36747
4.31906	1.30977
4.3374	1.33862
4.35573	1.32131
4.37407	1.29438
4.39241	1.34054
4.41075	1.25784
4.42908	1.28284
4.44742	1.30977
4.46576	1.1886
4.48409	1.22706
4.50243	1.23668
4.52077	1.2713
4.5391	1.26938
4.55744	1.32323
4.57578	1.26168
4.59411	1.20975
4.61245	1.22129
4.63079	1.2136
4.64913	1.23091
4.66746	1.25014
4.6858	1.08474
4.70414	1.19437
4.72247	1.22129
4.74081	1.26361
4.75915	1.25784
4.77748	1.20783
4.79582	1.19629
4.81416	1.16552
4.83249	1.1886
4.85083	1.20783
4.86917	1.1559
4.8875	1.26938
4.90584	1.27515
4.92418	1.15013
4.94252	1.25591
4.96085	1.19437
4.97919	1.15013
4.99753	1.16167
5.01586	1.20399
5.0342	1.21168
5.05254	1.18283
5.07087	1.15013
5.08921	1.21937
5.10755	1.2386
5.12588	1.10397
5.14422	1.22514
5.16256	1.20206
5.1809	1.20206
5.19923	1.11936
5.21757	1.16744
5.23591	1.13667
5.25424	1.22706
5.27258	1.1636
5.29092	1.17898
5.30925	1.21168
5.32759	1.16167
5.34593	1.29053
5.36426	1.17321
5.3826	1.12513
5.40094	1.12128
5.41927	1.13859
5.43761	1.23476
5.45595	1.12513
5.47429	1.14629
5.49262	1.17706
5.51096	1.21937
5.5293	1.19245
5.54763	1.20591
5.56597	1.17321
5.58431	1.19629
5.60264	1.18283
5.62098	1.12321
5.63932	1.16744
5.65765	1.20399
5.67599	1.1886
5.69433	1.26745
5.71267	1.12705
5.731	1.20399
5.74934	1.18475
5.76768	1.27515
5.78601	1.21745
5.80435	1.17898
5.82269	1.32131
5.84102	1.30015
5.85936	1.28669
5.8777	1.40978
5.89603	1.37324
5.91437	1.46555
5.93271	1.35593
5.95104	1.45401
5.96938	1.44632
5.98772	1.55018
6.00606	1.46748
6.02439	1.48286
6.04273	1.54441
6.06107	1.58672
6.0794	1.58864
6.09774	1.67712
6.11608	1.71558
6.13441	1.74059
6.15275	1.79059
6.17109	1.80405
6.18942	1.95599
6.20776	1.92138
6.2261	1.98292
6.24444	1.95023
6.26277	2.17525
6.28111	2.25218
6.29945	2.24834
6.31778	2.41566
6.33612	2.45028
6.35446	2.59838
6.37279	2.60415
6.39113	2.83302
6.40947	2.79455
6.4278	3.13113
6.44614	3.23114
6.46448	3.24845
6.48282	3.45232
6.50115	3.63888
6.51949	4.06778
6.53783	4.23895
6.55616	4.4986
6.5745	4.75247
6.59284	5.21022
6.61117	5.52756
6.62951	5.69489
6.64785	6.30265
6.66618	6.58922
6.68452	7.07966
6.70286	7.63165
6.72119	7.87591
6.73953	8.97027
6.75787	9.48956
6.77621	10.1781
6.79454	11.0686
6.81288	12.3168
6.83122	13.0861
6.84955	14.7132
6.86789	16.0172
6.88623	17.5424
6.90456	19.3945
6.9229	21.164
6.94124	23.22
6.95957	25.7126
6.97791	28.6187
6.99625	32.0114
7.01459	35.4599
7.03292	39.6661
7.05126	44.884
7.0696	50.2346
7.08793	55.8026
7.10627	61.9052
7.12461	65.4152
7.14294	69.5138
7.16128	72.818
7.17962	76.6665
7.19795	80.5439
7.21629	89.4142
7.23463	101.854
7.25296	116.317
7.2713	130.704
7.28964	133.95
7.30798	125.63
7.32631	107.497
7.34465	84.4886
7.36299	62.0937
7.38132	43.3839
7.39966	31.1786
7.418	23.9431
7.43633	19.6273
7.45467	14.694
7.47301	11.2667
7.49134	7.98746
7.50968	5.92568
7.52802	4.44282
7.54636	3.52348
7.56469	2.80609
7.58303	2.77147
7.60137	2.39643
7.6197	2.17525
7.63804	2.01177
7.65638	1.87137
7.67471	1.70981
7.69305	1.69443
7.71139	1.54249
7.72972	1.61942
7.74806	1.46748
7.7664	1.3867
7.78473	1.3617
7.80307	1.32708
7.82141	1.24245
7.83975	1.19822
7.85808	1.11359
7.87642	1.04435
7.89476	1.07512
7.91309	1.09436
7.93143	1.11167
7.94977	1.01743
7.9681	1.04627
7.98644	0.911644
8.00478	0.940493
8.02311	0.905874
8.04145	0.90395
8.05979	0.892411
8.07813	0.832788
8.09646	0.848175
8.1148	0.919337
8.13314	0.798169
8.15147	0.875101
8.16981	0.873178
8.18815	0.7347
8.20648	0.861638
8.22482	0.76932
8.24316	0.828942
8.26149	0.690464
8.27983	0.700081
8.29817	0.790476
8.3165	0.700081
8.33484	0.690464
8.35318	0.753933
8.37152	0.640459
8.38985	0.727007
8.40819	0.665461
8.42653	0.688541
8.44486	0.744317
8.4632	0.680848
8.48154	0.663538
8.49987	0.580836
8.51821	0.678924
8.53655	0.598146
8.55488	0.661615
8.57322	0.621226
8.59156	0.663538
8.6099	0.663538
8.62823	0.651998
8.64657	0.605839
8.66491	0.626995
8.68324	0.626995
8.70158	0.636612
8.71992	0.657768
8.73825	0.569296
8.75659	0.578913
8.77493	0.626995
8.79326	0.611609
8.8116	0.638535
8.82994	0.573143
8.84828	0.5366
8.86661	0.505828
8.88495	0.551987
8.90329	0.578913
8.92162	0.523137
8.93996	0.605839
8.9583	0.503904
8.97663	0.57122
8.99497	0.490441
9.01331	0.601993
9.03164	0.544294
9.04998	0.561603
9.06832	0.534677
9.08665	0.563527
9.10499	0.546217
9.12333	0.573143
9.14167	0.573143
9.16	0.598146
9.17834	0.511597
9.19668	0.600069
9.21501	0.563527
9.23335	0.515444
9.25169	0.503904
9.27002	0.532754
9.28836	0.500058
9.3067	0.503904
9.32503	0.513521
9.34337	0.494288
9.36171	0.56545
9.38005	0.490441
9.39838	0.498134
9.41672	0.551987
9.43506	0.573143
9.45339	0.523137
9.47173	0.561603
9.49007	0.484671
9.5084	0.507751
9.52674	0.484671
9.54508	0.509674
9.56341	0.498134
9.58175	0.496211
9.60009	0.478901
9.61842	0.463515
9.63676	0.442359
9.6551	0.505828
9.67344	0.492365
9.69177	0.519291
9.71011	0.540447
9.72845	0.450052
9.74678	0.513521
9.76512	0.463515
9.78346	0.500058
9.80179	0.465438
9.82013	0.496211
9.83847	0.517367
9.8568	0.413509
9.87514	0.496211
9.89348	0.450052
9.91182	0.455822
9.93015	0.401969
9.94849	0.469285
9.96683	0.430819
9.98516	0.450052
10.0035	0.413509
10.0218	0.451975
10.0402	0.423126
10.0585	0.413509
10.0768	0.448129
10.0952	0.440435
10.1135	0.451975
10.1319	0.465438
10.1502	0.450052
10.1685	0.432742
10.1869	0.471208
10.2052	0.503904
10.2235	0.482748
10.2419	0.444282
10.2602	0.457745
10.2786	0.403893
10.2969	0.490441
10.3152	0.451975
10.3336	0.436589
10.3519	0.461592
10.3702	0.444282
10.3886	0.39043
10.4069	0.428896
10.4252	0.419279
10.4436	0.425049
10.4619	0.432742
10.4803	0.430819
10.4986	0.446205
10.5169	0.423126
10.5353	0.413509
10.5536	0.359657
10.5719	0.448129
10.5903	0.455822
10.6086	0.401969
10.627	0.376967
10.6453	0.465438
10.6636	0.415433
10.682	0.419279
10.7003	0.473132
10.7186	0.417356
10.737	0.394276
10.7553	0.451975
10.7736	0.413509
10.792	0.476978
10.8103	0.442359
10.8287	0.400046
10.847	0.405816
10.8653	0.380813
10.8837	0.382736
10.902	0.401969
10.9203	0.348117
10.9387	0.39043
10.957	0.405816
10.9754	0.442359
10.9937	0.421202
11.012	0.409663
11.0304	0.376967
11.0487	0.417356
11.067	0.37889
11.0854	0.392353
11.1037	0.442359
11.1221	0.37312
11.1404	0.436589
11.1587	0.398123
11.1771	0.346194
11.1954	0.36735
11.2137	0.444282
11.2321	0.398123
11.2504	0.417356
11.2687	0.453899
11.2871	0.371197
11.3054	0.405816
11.3238	0.380813
11.3421	0.428896
11.3604	0.417356
11.3788	0.3962
11.3971	0.423126
11.4154	0.415433
11.4338	0.386583
11.4521	0.401969
11.4705	0.357734
11.4888	0.403893
11.5071	0.415433
11.5255	0.417356
11.5438	0.446205
11.5621	0.403893
11.5805	0.403893
11.5988	0.413509
11.6171	0.423126
11.6355	0.348117
11.6538	0.401969
11.6722	0.428896
11.6905	0.425049
11.7088	0.36158
11.7272	0.423126
11.7455	0.388506
11.7638	0.388506
11.7822	0.392353
11.8005	0.386583
11.8189	0.388506
11.8372	0.369273
11.8555	0.401969
11.8739	0.407739
11.8922	0.455822
11.9105	0.423126
11.9289	0.463515
11.9472	0.448129
11.9655	0.436589
11.9839	0.405816
12.0022	0.39043
12.0206	0.39043
12.0389	0.453899
12.0572	0.430819
12.0756	0.38466
12.0939	0.517367
12.1122	0.471208
12.1306	0.428896
12.1489	0.417356
12.1673	0.475055
12.1856	0.478901
12.2039	0.505828
12.2223	0.569296
12.2406	0.590453
12.2589	0.592376
12.2773	0.721237
12.2956	0.74624
12.3139	0.72316
12.3323	0.848175
12.3506	0.959726
12.369	1.05204
12.3873	0.990499
12.4056	0.996269
12.424	0.959726
12.4423	0.965496
12.4606	0.986652
12.479	1.01743
12.4973	1.1636
12.5157	1.22899
12.534	1.45978
12.5523	1.68096
12.5707	1.80021
12.589	1.96369
12.6073	2.13871
12.6257	2.04831
12.644	1.8906
12.6624	1.73289
12.6807	1.22129
12.699	1.01166
12.7174	0.794322
12.7357	0.719314
12.754	0.634689
12.7724	0.607762
12.7907	0.586606
12.809	0.532754
12.8274	0.498134
12.8457	0.444282
12.8641	0.380813
12.8824	0.409663
12.9007	0.36735
12.9191	0.413509
12.9374	0.430819
12.9557	0.423126
12.9741	0.421202
12.9924	0.411586
13.0108	0.411586
13.0291	0.37889
13.0474	0.380813
13.0658	0.332731
13.0841	0.351964
13.1024	0.37889
13.1208	0.338501
13.1391	0.363503
13.1574	0.359657
13.1758	0.407739
13.1941	0.35004
13.2125	0.403893
13.2308	0.363503
13.2491	0.363503
13.2675	0.400046
13.2858	0.298111
13.3041	0.37889
13.3225	0.35004
13.3408	0.382736
13.3592	0.338501
13.3775	0.357734
13.3958	0.405816
13.4142	0.351964
13.4325	0.392353
13.4508	0.369273
13.4692	0.36158
13.4875	0.342347
13.5058	0.376967
13.5242	0.336577
13.5425	0.39043
13.5609	0.340424
13.5792	0.338501
13.5975	0.35581
13.6159	0.405816
13.6342	0.365427
13.6525	0.309651
13.6709	0.351964
13.6892	0.371197
13.7076	0.37889
13.7259	0.334654
13.7442	0.313498
13.7626	0.34427
13.7809	0.357734
13.7992	0.375043
13.8176	0.332731
13.8359	0.338501
13.8542	0.330807
13.8726	0.398123
13.8909	0.380813
13.9093	0.37312
13.9276	0.317344
13.9459	0.363503
13.9643	0.375043
13.9826	0.37889
14.0009	0.332731
14.0193	0.35004
14.0376	0.380813
14.056	0.388506
14.0743	0.440435
14.0926	0.376967
14.111	0.403893
14.1293	0.417356
14.1476	0.405816
14.166	0.340424
14.1843	0.417356
14.2026	0.376967
14.221	0.394276
14.2393	0.423126
14.2577	0.415433
14.276	0.446205
14.2943	0.421202
14.3127	0.438512
14.331	0.419279
14.3493	0.409663
14.3677	0.405816
14.386	0.359657
14.4044	0.365427
14.4227	0.451975
14.441	0.440435
14.4594	0.376967
14.4777	0.423126
14.496	0.39043
14.5144	0.411586
14.5327	0.426972
14.5511	0.538524
14.5694	0.459668
14.5877	0.448129
14.6061	0.461592
14.6244	0.465438
14.6427	0.426972
14.6611	0.450052
14.6794	0.426972
14.6977	0.455822
14.7161	0.457745
14.7344	0.392353
14.7528	0.407739
14.7711	0.432742
14.7894	0.3962
14.8078	0.35581
14.8261	0.380813
14.8444	0.421202
14.8628	0.444282
14.8811	0.365427
14.8995	0.340424
14.9178	0.388506
14.9361	0.371197
14.9545	0.336577
14.9728	0.392353
14.9911	0.35581
15.0095	0.36158
15.0278	0.375043
15.0461	0.321191
15.0645	0.348117
15.0828	0.313498
15.1012	0.39043
15.1195	0.3962
15.1378	0.357734
15.1562	0.359657
15.1745	0.363503
15.1928	0.325038
15.2112	0.348117
15.2295	0.3962
15.2479	0.313498
15.2662	0.351964
15.2845	0.348117
15.3029	0.371197
15.3212	0.37889
15.3395	0.317344
15.3579	0.336577
15.3762	0.36735
15.3945	0.359657
15.4129	0.37312
15.4312	0.351964
15.4496	0.353887
15.4679	0.342347
15.4862	0.401969
15.5046	0.37889
15.5229	0.376967
15.5412	0.388506
15.5596	0.348117
15.5779	0.38466
15.5963	0.369273
15.6146	0.336577
15.6329	0.340424
15.6513	0.375043
15.6696	0.3962
15.6879	0.403893
15.7063	0.37889
15.7246	0.394276
15.7429	0.36735
15.7613	0.398123
15.7796	0.357734
15.798	0.421202
15.8163	0.36735
15.8346	0.357734
15.853	0.386583
15.8713	0.37312
15.8896	0.388506
15.908	0.388506
15.9263	0.417356
15.9447	0.39043
15.963	0.365427
15.9813	0.386583
15.9997	0.36735
16.018	0.338501
16.0363	0.35581
16.0547	0.376967
16.073	0.371197
16.0914	0.426972
16.1097	0.388506
16.128	0.403893
16.1464	0.37889
16.1647	0.394276
16.183	0.375043
16.2014	0.392353
16.2197	0.35581
16.238	0.334654
16.2564	0.426972
16.2747	0.357734
16.2931	0.398123
16.3114	0.363503
16.3297	0.394276
16.3481	0.375043
16.3664	0.336577
16.3847	0.336577
16.4031	0.409663
16.4214	0.351964
16.4398	0.365427
16.4581	0.346194
16.4764	0.35581
16.4948	0.392353
16.5131	0.375043
16.5314	0.363503
16.5498	0.36158
16.5681	0.398123
16.5864	0.409663
16.6048	0.359657
16.6231	0.376967
16.6415	0.332731
16.6598	0.376967
16.6781	0.392353
16.6965	0.369273
16.7148	0.401969
16.7331	0.39043
16.7515	0.380813
16.7698	0.375043
16.7882	0.388506
16.8065	0.37889
16.8248	0.313498
16.8432	0.348117
16.8615	0.392353
16.8798	0.365427
16.8982	0.382736
16.9165	0.415433
16.9348	0.375043
16.9532	0.394276
16.9715	0.35004
16.9899	0.36735
17.0082	0.38466
17.0265	0.375043
17.0449	0.434666
17.0632	0.425049
17.0815	0.38466
17.0999	0.394276
17.1182	0.39043
17.1366	0.428896
17.1549	0.357734
17.1732	0.380813
17.1916	0.446205
17.2099	0.425049
17.2282	0.38466
17.2466	0.388506
17.2649	0.411586
17.2832	0.451975
17.3016	0.39043
17.3199	0.421202
17.3383	0.440435
17.3566	0.398123
17.3749	0.476978
17.3933	0.455822
17.4116	0.430819
17.4299	0.446205
17.4483	0.448129
17.4666	0.500058
17.485	0.428896
17.5033	0.546217
17.5216	0.53083
17.54	0.465438
17.5583	0.446205
17.5766	0.521214
17.595	0.461592
17.6133	0.538524
17.6316	0.496211
17.65	0.515444
17.6683	0.57699
17.6867	0.538524
17.705	0.550063
17.7233	0.578913
17.7417	0.58276
17.76	0.596223
17.7783	0.630842
17.7967	0.680848
17.815	0.755856
17.8334	0.74624
17.8517	0.725084
17.87	0.821249
17.8884	0.896257
17.9067	0.986652
17.925	1.00781
17.9434	1.04243
17.9617	1.06358
17.9801	1.0732
17.9984	1.03281
18.0167	0.971266
18.0351	0.855868
18.0534	0.873178
18.0717	0.76355
18.0901	0.755856
18.1084	0.671231
18.1267	0.607762
18.1451	0.632765
18.1634	0.519291
18.1818	0.588529
18.2001	0.513521
18.2184	0.496211
18.2368	0.584683
18.2551	0.473132
18.2734	0.513521
18.2918	0.453899
18.3101	0.484671
18.3285	0.498134
18.3468	0.509674
18.3651	0.471208
18.3835	0.563527
18.4018	0.505828
18.4201	0.484671
18.4385	0.53083
18.4568	0.498134
18.4751	0.5366
18.4935	0.507751
18.5118	0.54814
18.5302	0.503904
18.5485	0.550063
18.5668	0.575066
18.5852	0.555833
18.6035	0.569296
18.6218	0.488518
18.6402	0.58276
18.6585	0.526984
18.6769	0.540447
18.6952	0.54237
18.7135	0.575066
18.7319	0.598146
18.7502	0.592376
18.7685	0.640459
18.7869	0.592376
18.8052	0.625072
18.8235	0.650075
18.8419	0.713544
18.8602	0.748163
18.8786	0.7347
18.8969	0.765473
18.9152	0.836635
18.9336	0.894334
18.9519	0.942416
18.9702	1.05012
18.9886	0.884717
19.0069	0.978959
19.0253	0.957803
19.0436	0.986652
19.0619	0.95588
19.0803	1.14821
19.0986	1.23668
19.1169	1.23476
19.1353	1.40593
19.1536	1.68866
19.1719	1.90214
19.1903	2.12332
19.2086	2.633
19.227	3.15421
19.2453	3.66196
19.2636	4.44667
19.282	5.06597
19.3003	5.95069
19.3186	6.2238
19.337	6.02954
19.3553	5.66988
19.3737	4.97942
19.392	4.35435
19.4103	3.57541
19.4287	2.78109
19.447	2.38874
19.4653	2.04254
19.4837	1.73866
19.502	1.48286
19.5204	1.47132
19.5387	1.26938
19.557	1.18475
19.5754	1.2386
19.5937	1.20206
19.612	1.12513
19.6304	1.0155
19.6487	1.00589
19.667	0.892411
19.6854	0.832788
19.7037	0.813555
19.7221	0.759703
19.7404	0.790476
19.7587	0.690464
19.7771	0.661615
19.7954	0.663538
19.8137	0.609686
19.8321	0.55968
19.8504	0.598146
19.8688	0.57699
19.8871	0.590453
19.9054	0.563527
19.9238	0.53083
19.9421	0.53083
19.9604	0.619302
19.9788	0.523137
19.9971	0.57122
20.0154	0.621226
20.0338	0.532754
20.0521	0.540447
20.0705	0.546217
20.0888	0.515444
20.1071	0.517367
20.1255	0.55391
20.1438	0.5366
20.1621	0.463515
20.1805	0.471208
20.1988	0.517367
20.2172	0.580836
20.2355	0.507751
20.2538	0.557757
20.2722	0.598146
20.2905	0.546217
20.3088	0.546217
20.3272	0.626995
20.3455	0.54237
20.3638	0.55391
20.3822	0.580836
20.4005	0.586606
20.4189	0.642382
20.4372	0.601993
20.4555	0.613532
20.4739	0.638535
20.4922	0.640459
20.5105	0.644305
20.5289	0.617379
20.5472	0.665461
20.5656	0.684694
20.5839	0.703927
20.6022	0.790476
20.6206	0.780859
20.6389	0.773166
20.6572	0.95011
20.6756	0.965496
20.6939	1.0155
20.7122	1.03858
20.7306	1.1059
20.7489	1.10974
20.7673	1.07512
20.7856	1.06166
20.8039	0.963573
20.8223	0.90972
20.8406	0.823172
20.8589	0.840482
20.8773	0.730854
20.8956	0.738547
20.914	0.648152
20.9323	0.715467
20.9506	0.667385
20.969	0.694311
20.9873	0.675078
21.0056	0.651998
21.024	0.609686
21.0423	0.567373
21.0607	0.625072
21.079	0.669308
21.0973	0.598146
21.1157	0.580836
21.134	0.580836
21.1523	0.680848
21.1707	0.613532
21.189	0.675078
21.2073	0.703927
21.2257	0.780859
21.244	0.700081
21.2624	0.777013
21.2807	0.748163
21.299	0.813555
21.3174	0.700081
21.3357	0.736623
21.354	0.684694
21.3724	0.698157
21.3907	0.623149
21.4091	0.573143
21.4274	0.619302
21.4457	0.592376
21.4641	0.667385
21.4824	0.600069
21.5007	0.598146
21.5191	0.659691
21.5374	0.611609
21.5557	0.638535
21.5741	0.56545
21.5924	0.575066
21.6108	0.615456
21.6291	0.636612
21.6474	0.600069
21.6658	0.550063
21.6841	0.621226
21.7024	0.636612
21.7208	0.621226
21.7391	0.686618
21.7575	0.678924
21.7758	0.653922
21.7941	0.686618
21.8125	0.736623
21.8308	0.76355
21.8491	0.828942
21.8675	0.855868
21.8858	0.936647
21.9041	0.990499
21.9225	1.03858
21.9408	0.959726
21.9592	1.00973
21.9775	0.963573
21.9958	0.90395
22.0142	0.865484
22.0325	0.821249
22.0508	0.680848
22.0692	0.732777
22.0875	0.7347
22.1059	0.719314
22.1242	0.713544
22.1425	0.76932
22.1609	0.802016
22.1792	0.830865
22.1975	0.813555
22.2159	0.788553
22.2342	0.811632
22.2525	0.703927
22.2709	0.755856
22.2892	0.671231
22.3076	0.713544
22.3259	0.630842
22.3442	0.609686
22.3626	0.617379
22.3809	0.55391
22.3992	0.569296
22.4176	0.544294
22.4359	0.573143
22.4543	0.501981
22.4726	0.482748
22.4909	0.492365
22.5093	0.501981
22.5276	0.54814
22.5459	0.500058
22.5643	0.465438
22.5826	0.519291
22.6009	0.505828
22.6193	0.490441
22.6376	0.507751
22.656	0.528907
22.6743	0.515444
22.6926	0.501981
22.711	0.557757
22.7293	0.56545
22.7476	0.56545
22.766	0.580836
22.7843	0.563527
22.8027	0.546217
22.821	0.607762
22.8393	0.596223
22.8577	0.586606
22.876	0.563527
22.8943	0.546217
22.9127	0.596223
22.931	0.623149
22.9494	0.57122
22.9677	0.657768
22.986	0.648152
23.0044	0.688541
23.0227	0.636612
23.041	0.730854
23.0594	0.730854
23.0777	0.809709
23.096	0.853945
23.1144	0.836635
23.1327	1.00012
23.1511	1.00781
23.1694	1.11167
23.1877	1.1636
23.2061	1.24437
23.2244	1.16937
23.2427	1.10397
23.2611	1.0732
23.2794	1.03666
23.2978	0.859715
23.3161	0.803939
23.3344	0.784706
23.3528	0.696234
23.3711	0.657768
23.3894	0.675078
23.4078	0.611609
23.4261	0.532754
23.4444	0.55391
23.4628	0.55968
23.4811	0.601993
23.4995	0.55391
23.5178	0.528907
23.5361	0.457745
23.5545	0.526984
23.5728	0.494288
23.5911	0.498134
23.6095	0.492365
23.6278	0.496211
23.6462	0.465438
23.6645	0.471208
23.6828	0.442359
23.7012	0.480825
23.7195	0.511597
23.7378	0.426972
23.7562	0.450052
23.7745	0.451975
23.7928	0.457745
23.8112	0.471208
23.8295	0.523137
23.8479	0.473132
23.8662	0.532754
23.8845	0.505828
23.9029	0.521214
23.9212	0.492365
23.9395	0.503904
23.9579	0.53083
23.9762	0.534677
23.9946	0.519291
24.0129	0.496211
24.0312	0.55391
24.0496	0.575066
24.0679	0.625072
24.0862	0.580836
24.1046	0.555833
24.1229	0.511597
24.1412	0.607762
24.1596	0.653922
24.1779	0.603916
24.1963	0.673155
24.2146	0.786629
24.2329	0.72893
24.2513	0.780859
24.2696	0.875101
24.2879	0.973189
24.3063	0.988576
24.3246	0.963573
24.343	0.973189
24.3613	1.12705
24.3796	1.02896
24.398	0.965496
24.4163	0.93857
24.4346	0.90972
24.453	0.878948
24.4713	0.794322
24.4897	0.828942
24.508	0.659691
24.5263	0.767396
24.5447	0.611609
24.563	0.592376
24.5813	0.573143
24.5997	0.561603
24.618	0.507751
24.6363	0.551987
24.6547	0.55391
24.673	0.503904
24.6914	0.509674
24.7097	0.482748
24.728	0.507751
24.7464	0.494288
24.7647	0.503904
24.783	0.525061
24.8014	0.515444
24.8197	0.534677
24.8381	0.490441
24.8564	0.436589
24.8747	0.544294
24.8931	0.550063
24.9114	0.513521
24.9297	0.523137
24.9481	0.557757
24.9664	0.584683
24.9847	0.513521
25.0031	0.523137
25.0214	0.505828
25.0398	0.5366
25.0581	0.54814
25.0764	0.55968
25.0948	0.57699
25.1131	0.611609
25.1314	0.563527
25.1498	0.596223
25.1681	0.575066
25.1865	0.578913
25.2048	0.567373
25.2231	0.596223
25.2415	0.665461
25.2598	0.673155
25.2781	0.813555
25.2965	0.730854
25.3148	0.773166
25.3331	0.832788
25.3515	1.00973
25.3698	1.0482
25.3882	1.20591
25.4065	1.16744
25.4248	1.25976
25.4432	1.22514
25.4615	1.25399
25.4798	1.12898
25.4982	1.13475
25.5165	0.998192
25.5349	1.00589
25.5532	0.896257
25.5715	0.907797
25.5899	0.767396
25.6082	0.761626
25.6265	0.725084
25.6449	0.682771
25.6632	0.646228
25.6815	0.628919
25.6999	0.557757
25.7182	0.586606
25.7366	0.54237
25.7549	0.517367
25.7732	0.54237
25.7916	0.532754
25.8099	0.538524
25.8282	0.432742
25.8466	0.496211
25.8649	0.451975
25.8833	0.465438
25.9016	0.442359
25.9199	0.451975
25.9383	0.39043
25.9566	0.348117
25.9749	0.3962
25.9933	0.353887
26.0116	0.386583
26.0299	0.394276
26.0483	0.38466
26.0666	0.413509
26.085	0.37312
26.1033	0.39043
26.1216	0.371197
26.14	0.398123
26.1583	0.35004
26.1766	0.386583
26.195	0.450052
26.2133	0.340424
26.2317	0.388506
26.25	0.38466
26.2683	0.419279
26.2867	0.451975
26.305	0.38466
26.3233	0.425049
26.3417	0.376967
26.36	0.459668
26.3784	0.421202
26.3967	0.475055
26.415	0.486595
26.4334	0.457745
26.4517	0.534677
26.47	0.471208
26.4884	0.482748
26.5067	0.475055
26.525	0.486595
26.5434	0.507751
26.5617	0.465438
26.5801	0.436589
26.5984	0.490441
26.6167	0.459668
26.6351	0.551987
26.6534	0.471208
26.6717	0.463515
26.6901	0.490441
26.7084	0.513521
26.7268	0.517367
26.7451	0.446205
26.7634	0.438512
26.7818	0.451975
26.8001	0.488518
26.8184	0.398123
26.8368	0.388506
26.8551	0.413509
26.8734	0.413509
26.8918	0.425049
26.9101	0.407739
26.9285	0.415433
26.9468	0.369273
26.9651	0.34427
26.9835	0.380813
27.0018	0.323114
27.0201	0.36735
27.0385	0.38466
27.0568	0.359657
27.0752	0.35581
27.0935	0.37312
27.1118	0.36158
27.1302	0.415433
27.1485	0.363503
27.1668	0.38466
27.1852	0.359657
27.2035	0.342347
27.2218	0.369273
27.2402	0.369273
27.2585	0.36158
27.2769	0.365427
27.2952	0.425049
27.3135	0.419279
27.3319	0.37312
27.3502	0.351964
27.3685	0.394276
27.3869	0.459668
27.4052	0.436589
27.4236	0.407739
27.4419	0.486595
27.4602	0.438512
27.4786	0.57699
27.4969	0.461592
27.5152	0.523137
27.5336	0.407739
27.5519	0.453899
27.5702	0.465438
27.5886	0.432742
27.6069	0.453899
27.6253	0.473132
27.6436	0.36735
27.6619	0.376967
27.6803	0.407739
27.6986	0.338501
27.7169	0.371197
27.7353	0.398123
27.7536	0.363503
27.772	0.321191
27.7903	0.371197
27.8086	0.326961
27.827	0.303881
27.8453	0.326961
27.8636	0.328884
27.882	0.315421
27.9003	0.323114
27.9187	0.282725
27.937	0.326961
27.9553	0.286572
27.9737	0.325038
27.992	0.284648
28.0103	0.342347
28.0287	0.340424
28.047	0.301958
28.0653	0.340424
28.0837	0.276955
28.102	0.284648
28.1204	0.336577
28.1387	0.305805
28.157	0.305805
28.1754	0.321191
28.1937	0.305805
28.212	0.288495
28.2304	0.34427
28.2487	0.294265
28.2671	0.338501
28.2854	0.290418
28.3037	0.292341
28.3221	0.325038
28.3404	0.321191
28.3587	0.34427
28.3771	0.294265
28.3954	0.301958
28.4137	0.301958
28.4321	0.290418
28.4504	0.284648
28.4688	0.325038
28.4871	0.351964
28.5054	0.363503
28.5238	0.36158
28.5421	0.315421
28.5604	0.315421
28.5788	0.313498
28.5971	0.334654
28.6155	0.415433
28.6338	0.38466
28.6521	0.413509
28.6705	0.382736
28.6888	0.369273
28.7071	0.3962
28.7255	0.346194
28.7438	0.436589
28.7621	0.357734
28.7805	0.409663
28.7988	0.359657
28.8172	0.380813
28.8355	0.328884
28.8538	0.325038
28.8722	0.37312
28.8905	0.332731
28.9088	0.342347
28.9272	0.375043
28.9455	0.332731
28.9639	0.36735
28.9822	0.37312
29.0005	0.401969
29.0189	0.398123
29.0372	0.375043
29.0555	0.36735
29.0739	0.3962
29.0922	0.398123
29.1105	0.348117
29.1289	0.338501
29.1472	0.359657
29.1656	0.371197
29.1839	0.376967
29.2022	0.369273
29.2206	0.388506
29.2389	0.3962
29.2572	0.382736
29.2756	0.457745
29.2939	0.471208
29.3123	0.448129
29.3306	0.480825
29.3489	0.563527
29.3673	0.551987
29.3856	0.57699
29.4039	0.665461
29.4223	0.696234
29.4406	0.680848
29.459	0.707774
29.4773	0.684694
29.4956	0.671231
29.514	0.682771
29.5323	0.657768
29.5506	0.557757
29.569	0.519291
29.5873	0.57122
29.6056	0.534677
29.624	0.509674
29.6423	0.494288
29.6607	0.503904
29.679	0.446205
29.6973	0.413509
29.7157	0.421202
29.734	0.417356
29.7523	0.37312
29.7707	0.36735
29.789	0.382736
29.8074	0.313498
29.8257	0.330807
29.844	0.325038
29.8624	0.273108
29.8807	0.332731
29.899	0.325038
29.9174	0.319268
29.9357	0.315421
29.954	0.290418
29.9724	0.290418
29.9907	0.267339
30.0091	0.271185
30.0274	0.288495
30.0457	0.296188
30.0641	0.296188
30.0824	0.257722
30.1007	0.307728
30.1191	0.273108
30.1374	0.244259
30.1558	0.301958
30.1741	0.278878
30.1924	0.267339
30.2108	0.265415
30.2291	0.290418
30.2474	0.242336
30.2658	0.273108
30.2841	0.307728
30.3024	0.236566
30.3208	0.294265
30.3391	0.282725
30.3575	0.292341
30.3758	0.290418
30.3941	0.269262
30.4125	0.286572
30.4308	0.288495
30.4491	0.296188
30.4675	0.276955
30.4858	0.326961
30.5042	0.330807
30.5225	0.273108
30.5408	0.319268
30.5592	0.296188
30.5775	0.286572
30.5958	0.288495
30.6142	0.305805
30.6325	0.305805
30.6508	0.300035
30.6692	0.282725
30.6875	0.280802
30.7059	0.307728
30.7242	0.282725
30.7425	0.284648
30.7609	0.298111
30.7792	0.319268
30.7975	0.303881
30.8159	0.363503
30.8342	0.317344
30.8526	0.307728
30.8709	0.290418
30.8892	0.292341
30.9076	0.288495
30.9259	0.353887
30.9442	0.301958
30.9626	0.326961
30.9809	0.35004
30.9992	0.332731
31.0176	0.307728
31.0359	0.321191
31.0543	0.365427
31.0726	0.346194
31.0909	0.37312
31.1093	0.38466
31.1276	0.375043
31.1459	0.465438
31.1643	0.419279
31.1826	0.463515
31.201	0.473132
31.2193	0.58276
31.2376	0.517367
31.256	0.55968
31.2743	0.600069
31.2926	0.551987
31.311	0.58276
31.3293	0.584683
31.3477	0.498134
31.366	0.498134
31.3843	0.496211
31.4027	0.417356
31.421	0.39043
31.4393	0.405816
31.4577	0.425049
31.476	0.413509
31.4943	0.353887
31.5127	0.365427
31.531	0.34427
31.5494	0.37312
31.5677	0.309651
31.586	0.340424
31.6044	0.296188
31.6227	0.323114
31.641	0.328884
31.6594	0.325038
31.6777	0.317344
31.6961	0.286572
31.7144	0.323114
31.7327	0.276955
31.7511	0.294265
31.7694	0.261569
31.7877	0.257722
31.8061	0.271185
31.8244	0.259645
31.8427	0.284648
31.8611	0.280802
31.8794	0.292341
31.8978	0.259645
31.9161	0.284648
31.9344	0.319268
31.9528	0.286572
31.9711	0.301958
31.9894	0.386583
32.0078	0.325038
32.0261	0.336577
32.0445	0.330807
32.0628	0.369273
32.0811	0.457745
32.0995	0.415433
32.1178	0.39043
32.1361	0.478901
32.1545	0.421202
32.1728	0.382736
32.1911	0.392353
32.2095	0.421202
32.2278	0.357734
32.2462	0.375043
32.2645	0.36735
32.2828	0.336577
32.3012	0.401969
32.3195	0.290418
32.3378	0.298111
32.3562	0.290418
32.3745	0.298111
32.3929	0.238489
32.4112	0.313498
32.4295	0.271185
32.4479	0.282725
32.4662	0.284648
32.4845	0.269262
32.5029	0.257722
32.5212	0.219256
32.5395	0.263492
32.5579	0.280802
32.5762	0.221179
32.5946	0.251952
32.6129	0.257722
32.6312	0.261569
32.6496	0.246182
32.6679	0.248106
32.6862	0.251952
32.7046	0.248106
32.7229	0.215409
32.7413	0.226949
32.7596	0.230796
32.7779	0.255799
32.7963	0.265415
32.8146	0.234642
32.8329	0.217333
32.8513	0.221179
32.8696	0.276955
32.888	0.20964
32.9063	0.246182
32.9246	0.217333
32.943	0.211563
32.9613	0.194253
32.9796	0.217333
32.998	0.20387
33.0163	0.225026
33.0346	0.228873
33.053	0.20387
33.0713	0.20964
33.0897	0.226949
33.108	0.219256
33.1263	0.219256
33.1447	0.211563
33.163	0.238489
33.1813	0.213486
33.1997	0.223103
33.218	0.213486
33.2364	0.215409
33.2547	0.221179
33.273	0.17502
33.2914	0.219256
33.3097	0.215409
33.328	0.250029
33.3464	0.219256
33.3647	0.18079
33.383	0.250029
33.4014	0.225026
33.4197	0.225026
33.4381	0.219256
33.4564	0.20964
33.4747	0.196176
33.4931	0.19233
33.5114	0.230796
33.5297	0.211563
33.5481	0.223103
33.5664	0.259645
33.5848	0.242336
33.6031	0.18656
33.6214	0.217333
33.6398	0.221179
33.6581	0.200023
33.6764	0.217333
33.6948	0.201946
33.7131	0.16925
33.7314	0.251952
33.7498	0.178867
33.7681	0.200023
33.7865	0.219256
33.8048	0.19233
33.8231	0.242336
33.8415	0.223103
33.8598	0.201946
33.8781	0.200023
33.8965	0.240412
33.9148	0.221179
33.9332	0.17502
33.9515	0.213486
33.9698	0.19233
33.9882	0.236566
34.0065	0.257722
34.0248	0.211563
34.0432	0.200023
34.0615	0.20387
34.0798	0.230796
34.0982	0.196176
34.1165	0.219256
34.1349	0.211563
34.1532	0.226949
34.1715	0.215409
34.1899	0.211563
34.2082	0.184637
34.2265	0.184637
34.2449	0.196176
34.2632	0.200023
34.2816	0.213486
34.2999	0.211563
34.3182	0.200023
34.3366	0.20964
34.3549	0.244259
34.3732	0.19233
34.3916	0.236566
34.4099	0.19233
34.4282	0.219256
34.4466	0.225026
34.4649	0.213486
34.4833	0.228873
34.5016	0.242336
34.5199	0.228873
34.5383	0.226949
34.5566	0.223103
34.5749	0.240412
34.5933	0.234642
34.6116	0.217333
34.63	0.225026
34.6483	0.248106
34.6666	0.226949
34.685	0.255799
34.7033	0.228873
34.7216	0.276955
34.74	0.255799
34.7583	0.282725
34.7767	0.207716
34.795	0.242336
34.8133	0.276955
34.8317	0.232719
34.85	0.271185
34.8683	0.238489
34.8867	0.251952
34.905	0.248106
34.9233	0.230796
34.9417	0.269262
34.96	0.251952
34.9784	0.226949
34.9967	0.250029
35.015	0.238489
35.0334	0.20387
35.0517	0.20387
35.07	0.253875
35.0884	0.226949
35.1067	0.226949
35.1251	0.20964
35.1434	0.221179
35.1617	0.236566
35.1801	0.251952
35.1984	0.261569
35.2167	0.228873
35.2351	0.294265
35.2534	0.246182
35.2717	0.226949
35.2901	0.205793
35.3084	0.244259
35.3268	0.255799
35.3451	0.280802
35.3634	0.313498
35.3818	0.309651
35.4001	0.309651
35.4184	0.288495
35.4368	0.311574
35.4551	0.36158
35.4735	0.326961
35.4918	0.296188
35.5101	0.282725
35.5285	0.342347
35.5468	0.290418
35.5651	0.286572
35.5835	0.296188
35.6018	0.298111
35.6201	0.273108
35.6385	0.298111
35.6568	0.275032
35.6752	0.307728
35.6935	0.219256
35.7118	0.257722
35.7302	0.250029
35.7485	0.280802
35.7668	0.221179
35.7852	0.242336
35.8035	0.226949
35.8219	0.303881
35.8402	0.251952
35.8585	0.200023
35.8769	0.265415
35.8952	0.1981
35.9135	0.271185
35.9319	0.228873
35.9502	0.242336
35.9685	0.261569
35.9869	0.275032
36.0052	0.263492
36.0236	0.207716
36.0419	0.221179
36.0602	0.232719
36.0786	0.221179
36.0969	0.261569
36.1152	0.232719
36.1336	0.261569
36.1519	0.286572
36.1703	0.359657
36.1886	0.280802
36.2069	0.323114
36.2253	0.325038
36.2436	0.351964
36.2619	0.35004
36.2803	0.332731
36.2986	0.328884
36.317	0.275032
36.3353	0.294265
36.3536	0.307728
36.372	0.325038
36.3903	0.253875
36.4086	0.301958
36.427	0.242336
36.4453	0.263492
36.4636	0.259645
36.482	0.225026
36.5003	0.257722
36.5187	0.20387
36.537	0.242336
36.5553	0.226949
36.5737	0.238489
36.592	0.244259
36.6103	0.205793
36.6287	0.19233
36.647	0.211563
36.6654	0.230796
36.6837	0.20964
36.702	0.201946
36.7204	0.211563
36.7387	0.250029
36.757	0.19233
36.7754	0.211563
36.7937	0.273108
36.812	0.213486
36.8304	0.215409
36.8487	0.219256
36.8671	0.207716
36.8854	0.20387
36.9037	0.232719
36.9221	0.205793
36.9404	0.226949
36.9587	0.226949
36.9771	0.232719
36.9954	0.280802
37.0138	0.234642
37.0321	0.253875
37.0504	0.250029
37.0688	0.265415
37.0871	0.225026
37.1054	0.228873
37.1238	0.250029
37.1421	0.194253
37.1604	0.226949
37.1788	0.267339
37.1971	0.221179
37.2155	0.211563
37.2338	0.226949
37.2521	0.246182
37.2705	0.213486
37.2888	0.234642
37.3071	0.242336
37.3255	0.244259
37.3438	0.20964
37.3622	0.248106
37.3805	0.228873
37.3988	0.20964
37.4172	0.219256
37.4355	0.234642
37.4538	0.200023
37.4722	0.234642
37.4905	0.232719
37.5088	0.211563
37.5272	0.194253
37.5455	0.236566
37.5639	0.211563
37.5822	0.230796
37.6005	0.240412
37.6189	0.244259
37.6372	0.244259
37.6555	0.246182
37.6739	0.319268
37.6922	0.253875
37.7106	0.301958
37.7289	0.280802
37.7472	0.267339
37.7656	0.340424
37.7839	0.276955
37.8022	0.319268
37.8206	0.284648
37.8389	0.246182
37.8573	0.296188
37.8756	0.240412
37.8939	0.276955
37.9123	0.273108
37.9306	0.282725
37.9489	0.253875
37.9673	0.263492
37.9856	0.213486
38.0039	0.217333
38.0223	0.213486
38.0406	0.251952
38.059	0.20387
38.0773	0.250029
38.0956	0.215409
38.114	0.234642
38.1323	0.221179
38.1506	0.232719
38.169	0.211563
38.1873	0.234642
38.2057	0.226949
38.224	0.211563
38.2423	0.215409
38.2607	0.207716
38.279	0.223103
38.2973	0.205793
38.3157	0.223103
38.334	0.226949
38.3523	0.213486
38.3707	0.265415
38.389	0.232719
38.4074	0.232719
38.4257	0.257722
38.444	0.200023
38.4624	0.290418
38.4807	0.292341
38.499	0.284648
38.5174	0.303881
38.5357	0.294265
38.5541	0.267339
38.5724	0.250029
38.5907	0.230796
38.6091	0.280802
38.6274	0.244259
38.6457	0.255799
38.6641	0.253875
38.6824	0.290418
38.7007	0.236566
38.7191	0.244259
38.7374	0.250029
38.7558	0.257722
38.7741	0.219256
38.7924	0.228873
38.8108	0.234642
38.8291	0.244259
38.8474	0.259645
38.8658	0.20387
38.8841	0.215409
38.9025	0.242336
38.9208	0.244259
38.9391	0.263492
38.9575	0.219256
38.9758	0.20387
38.9941	0.211563
39.0125	0.265415
39.0308	0.236566
39.0491	0.236566
39.0675	0.200023
39.0858	0.261569
39.1042	0.246182
39.1225	0.276955
39.1408	0.238489
39.1592	0.317344
39.1775	0.238489
39.1958	0.294265
39.2142	0.311574
39.2325	0.334654
39.2509	0.307728
39.2692	0.340424
39.2875	0.328884
39.3059	0.325038
39.3242	0.276955
39.3425	0.263492
39.3609	0.228873
39.3792	0.271185
39.3975	0.250029
39.4159	0.238489
39.4342	0.20387
39.4526	0.246182
39.4709	0.240412
39.4892	0.20964
39.5076	0.217333
39.5259	0.242336
39.5442	0.253875
39.5626	0.211563
39.5809	0.213486
39.5993	0.196176
39.6176	0.1981
39.6359	0.200023
39.6543	0.251952
39.6726	0.190407
39.6909	0.20387
39.7093	0.232719
39.7276	0.201946
39.746	0.1981
39.7643	0.213486
39.7826	0.225026
39.801	0.19233
39.8193	0.178867
39.8376	0.184637
39.856	0.196176
39.8743	0.215409
39.8926	0.219256
39.911	0.225026
39.9293	0.194253
39.9477	0.226949
39.966	0.171174
39.9843	0.221179
40.0027	0.221179
40.021	0.18656
40.0393	0.215409
40.0577	0.19233
40.076	0.219256
40.0944	0.201946
40.1127	0.217333
40.131	0.16348
40.1494	0.16925
40.1677	0.196176
40.186	0.232719
40.2044	0.201946
40.2227	0.184637
40.241	0.20387
40.2594	0.196176
40.2777	0.230796
40.2961	0.211563
40.3144	0.213486
40.3327	0.226949
40.3511	0.217333
40.3694	0.226949
40.3877	0.211563
40.4061	0.184637
40.4244	0.178867
40.4428	0.221179
40.4611	0.246182
40.4794	0.20964
40.4978	0.230796
40.5161	0.230796
40.5344	0.194253
[truncated: 1,056 more rows]

## Sheet: Cooling 175 °C
2theta	Intensity
3.89731	1.41362
3.91565	1.45209
3.93399	1.55595
3.95232	1.33477
3.97066	1.51941
3.989	1.42324
4.00733	1.39824
4.02567	1.42324
4.04401	1.40593
4.06234	1.40978
4.08068	1.39824
4.09902	1.33669
4.11735	1.41555
4.13569	1.41362
4.15403	1.42709
4.17237	1.35593
4.1907	1.36554
4.20904	1.36554
4.22738	1.34631
4.24571	1.4117
4.26405	1.35593
4.28239	1.29053
4.30072	1.25014
4.31906	1.32515
4.3374	1.36747
4.35573	1.35593
4.37407	1.33477
4.39241	1.29438
4.41075	1.29053
4.42908	1.37516
4.44742	1.35593
4.46576	1.19437
4.48409	1.31554
4.50243	1.27899
4.52077	1.28092
4.5391	1.24245
4.55744	1.2463
4.57578	1.27322
4.59411	1.32515
4.61245	1.22514
4.63079	1.23668
4.64913	1.28284
4.66746	1.24053
4.6858	1.17321
4.70414	1.19822
4.72247	1.28476
4.74081	1.25399
4.75915	1.22129
4.77748	1.1636
4.79582	1.22129
4.81416	1.24245
4.83249	1.25014
4.85083	1.20975
4.86917	1.26553
4.8875	1.23476
4.90584	1.25207
4.92418	1.11744
4.94252	1.13859
4.96085	1.12898
4.97919	1.2386
4.99753	1.14052
5.01586	1.20014
5.0342	1.11551
5.05254	1.13282
5.07087	1.19629
5.08921	1.10205
5.10755	1.19822
5.12588	1.24053
5.14422	1.17321
5.16256	1.22514
5.1809	1.14244
5.19923	1.19052
5.21757	1.11744
5.23591	1.2463
5.25424	1.05974
5.27258	1.15398
5.29092	1.10205
5.30925	1.15975
5.32759	1.1886
5.34593	1.08474
5.36426	1.15206
5.3826	1.1886
5.40094	1.10205
5.41927	1.11744
5.43761	1.15013
5.45595	1.10397
5.47429	1.14629
5.49262	1.12128
5.51096	1.2386
5.5293	1.17898
5.54763	1.19437
5.56597	1.14629
5.58431	1.19629
5.60264	1.1886
5.62098	1.16937
5.63932	1.2136
5.65765	1.1886
5.67599	1.20975
5.69433	1.19629
5.71267	1.18668
5.731	1.23283
5.74934	1.1559
5.76768	1.20975
5.78601	1.23668
5.80435	1.2713
5.82269	1.21168
5.84102	1.20783
5.85936	1.17706
5.8777	1.26168
5.89603	1.20975
5.91437	1.30207
5.93271	1.30784
5.95104	1.34246
5.96938	1.40208
5.98772	1.32131
6.00606	1.44632
6.02439	1.32515
6.04273	1.39055
6.06107	1.47709
6.0794	1.51941
6.09774	1.50402
6.11608	1.5521
6.13441	1.61942
6.15275	1.64827
6.17109	1.66173
6.18942	1.73674
6.20776	1.81367
6.2261	1.85598
6.24444	1.83867
6.26277	1.95407
6.28111	2.05793
6.29945	1.96561
6.31778	2.19448
6.33612	2.21564
6.35446	2.33296
6.37279	2.4849
6.39113	2.5753
6.40947	2.72339
6.4278	2.77917
6.44614	2.86379
6.46448	3.00227
6.48282	3.12728
6.50115	3.18498
6.51949	3.45617
6.53783	3.6235
6.55616	3.90814
6.5745	4.26203
6.59284	4.43897
6.61117	5.00827
6.62951	4.80632
6.64785	5.2006
6.66618	5.69489
6.68452	5.93338
6.70286	6.42766
6.72119	6.70654
6.73953	7.26238
6.75787	7.72589
6.77621	8.35096
6.79454	9.27992
6.81288	10.1108
6.83122	10.5224
6.84955	11.5994
6.86789	12.3784
6.88623	14.1305
6.90456	14.8825
6.9229	16.2211
6.94124	17.8348
6.95957	19.2503
6.97791	21.3371
6.99625	23.62
7.01459	25.7741
7.03292	28.2417
7.05126	31.1286
7.0696	34.6752
7.08793	38.2698
7.10627	42.9261
7.12461	48.0863
7.14294	53.9293
7.16128	61.936
7.17962	71.589
7.19795	82.5095
7.21629	94.2378
7.23463	108.145
7.25296	121.643
7.2713	133.44
7.28964	141.207
7.30798	137.743
7.32631	123.693
7.34465	105.556
7.36299	84.3117
7.38132	64.6171
7.39966	46.9843
7.418	33.7347
7.43633	25.526
7.45467	20.1254
7.47301	15.6537
7.49134	11.2975
7.50968	8.26057
7.52802	5.968
7.54636	4.57937
7.56469	3.57157
7.58303	3.1119
7.60137	2.79071
7.6197	2.35604
7.63804	2.16948
7.65638	2.16179
7.67471	1.90214
7.69305	1.70212
7.71139	1.63673
7.72972	1.57903
7.74806	1.58864
7.7664	1.47325
7.78473	1.40208
7.80307	1.34439
7.82141	1.26745
7.83975	1.24245
7.85808	1.17898
7.87642	1.22899
7.89476	1.05204
7.91309	1.02512
7.93143	1.00973
7.94977	1.03858
7.9681	1.00589
7.98644	1.05204
8.00478	0.9328
8.02311	0.975113
8.04145	0.871254
8.05979	0.963573
8.07813	0.846251
8.09646	0.846251
8.1148	0.877024
8.13314	0.813555
8.15147	0.771243
8.16981	0.840482
8.18815	0.771243
8.20648	0.767396
8.22482	0.817402
8.24316	0.707774
8.26149	0.71739
8.27983	0.682771
8.29817	0.696234
8.3165	0.790476
8.33484	0.736623
8.35318	0.780859
8.37152	0.694311
8.38985	0.646228
8.40819	0.705851
8.42653	0.665461
8.44486	0.644305
8.4632	0.642382
8.48154	0.663538
8.49987	0.671231
8.51821	0.755856
8.53655	0.648152
8.55488	0.655845
8.57322	0.657768
8.59156	0.636612
8.6099	0.594299
8.62823	0.586606
8.64657	0.607762
8.66491	0.563527
8.68324	0.592376
8.70158	0.603916
8.71992	0.596223
8.73825	0.644305
8.75659	0.600069
8.77493	0.567373
8.79326	0.592376
8.8116	0.596223
8.82994	0.56545
8.84828	0.644305
8.86661	0.56545
8.88495	0.519291
8.90329	0.57699
8.92162	0.544294
8.93996	0.550063
8.9583	0.596223
8.97663	0.55391
8.99497	0.588529
9.01331	0.573143
9.03164	0.53083
9.04998	0.578913
9.06832	0.54237
9.08665	0.515444
9.10499	0.498134
9.12333	0.498134
9.14167	0.546217
9.16	0.550063
9.17834	0.501981
9.19668	0.575066
9.21501	0.525061
9.23335	0.494288
9.25169	0.55968
9.27002	0.469285
9.28836	0.528907
9.3067	0.509674
9.32503	0.550063
9.34337	0.486595
9.36171	0.519291
9.38005	0.503904
9.39838	0.476978
9.41672	0.555833
9.43506	0.521214
9.45339	0.575066
9.47173	0.476978
9.49007	0.482748
9.5084	0.596223
9.52674	0.446205
9.54508	0.444282
9.56341	0.500058
9.58175	0.486595
9.60009	0.503904
9.61842	0.496211
9.63676	0.461592
9.6551	0.478901
9.67344	0.498134
9.69177	0.517367
9.71011	0.480825
9.72845	0.550063
9.74678	0.488518
9.76512	0.465438
9.78346	0.500058
9.80179	0.509674
9.82013	0.478901
9.83847	0.469285
9.8568	0.448129
9.87514	0.503904
9.89348	0.451975
9.91182	0.507751
9.93015	0.426972
9.94849	0.463515
9.96683	0.484671
9.98516	0.392353
10.0035	0.461592
10.0218	0.3962
10.0402	0.430819
10.0585	0.463515
10.0768	0.442359
10.0952	0.398123
10.1135	0.501981
10.1319	0.503904
10.1502	0.448129
10.1685	0.411586
10.1869	0.403893
10.2052	0.501981
10.2235	0.478901
10.2419	0.459668
10.2602	0.492365
10.2786	0.461592
10.2969	0.442359
10.3152	0.409663
10.3336	0.457745
10.3519	0.453899
10.3702	0.436589
10.3886	0.478901
10.4069	0.428896
10.4252	0.490441
10.4436	0.453899
10.4619	0.446205
10.4803	0.453899
10.4986	0.453899
10.5169	0.376967
10.5353	0.421202
10.5536	0.461592
10.5719	0.38466
10.5903	0.436589
10.6086	0.465438
10.627	0.411586
10.6453	0.386583
10.6636	0.461592
10.682	0.421202
10.7003	0.432742
10.7186	0.38466
10.737	0.421202
10.7553	0.455822
10.7736	0.432742
10.792	0.430819
10.8103	0.457745
10.8287	0.37889
10.847	0.450052
10.8653	0.413509
10.8837	0.432742
10.902	0.386583
10.9203	0.432742
10.9387	0.409663
10.957	0.430819
10.9754	0.348117
10.9937	0.417356
11.012	0.436589
11.0304	0.37889
11.0487	0.413509
11.067	0.411586
11.0854	0.38466
11.1037	0.442359
11.1221	0.336577
11.1404	0.380813
11.1587	0.405816
11.1771	0.386583
11.1954	0.450052
11.2137	0.386583
11.2321	0.401969
11.2504	0.453899
11.2687	0.423126
11.2871	0.365427
11.3054	0.388506
11.3238	0.448129
11.3421	0.400046
11.3604	0.413509
11.3788	0.413509
11.3971	0.39043
11.4154	0.382736
11.4338	0.37889
11.4521	0.409663
11.4705	0.37312
11.4888	0.369273
11.5071	0.436589
11.5255	0.37312
11.5438	0.398123
11.5621	0.400046
11.5805	0.363503
11.5988	0.363503
11.6171	0.36158
11.6355	0.34427
11.6538	0.405816
11.6722	0.348117
11.6905	0.392353
11.7088	0.371197
11.7272	0.419279
11.7455	0.357734
11.7638	0.363503
11.7822	0.363503
11.8005	0.413509
11.8189	0.369273
11.8372	0.35004
11.8555	0.351964
11.8739	0.39043
11.8922	0.371197
11.9105	0.403893
11.9289	0.415433
11.9472	0.359657
11.9655	0.401969
11.9839	0.417356
12.0022	0.409663
12.0206	0.450052
12.0389	0.351964
12.0572	0.428896
12.0756	0.436589
12.0939	0.476978
12.1122	0.371197
12.1306	0.461592
12.1489	0.436589
12.1673	0.475055
12.1856	0.455822
12.2039	0.448129
12.2223	0.407739
12.2406	0.498134
12.2589	0.448129
12.2773	0.550063
12.2956	0.469285
12.3139	0.534677
12.3323	0.517367
12.3506	0.57122
12.369	0.636612
12.3873	0.703927
12.4056	0.688541
12.424	0.771243
12.4423	0.828942
12.4606	1.00589
12.479	0.990499
12.4973	1.09628
12.5157	1.30977
12.534	1.44824
12.5523	1.66173
12.5707	1.78867
12.589	1.95215
12.6073	2.12525
12.6257	2.25988
12.644	2.08101
12.6624	2.02331
12.6807	1.76751
12.699	1.45978
12.7174	1.23668
12.7357	0.994345
12.754	0.850098
12.7724	0.684694
12.7907	0.584683
12.809	0.575066
12.8274	0.561603
12.8457	0.526984
12.8641	0.457745
12.8824	0.446205
12.9007	0.423126
12.9191	0.409663
12.9374	0.392353
12.9557	0.365427
12.9741	0.382736
12.9924	0.430819
13.0108	0.369273
13.0291	0.3962
13.0474	0.382736
13.0658	0.348117
13.0841	0.38466
13.1024	0.365427
13.1208	0.394276
13.1391	0.342347
13.1574	0.369273
13.1758	0.401969
13.1941	0.394276
13.2125	0.35581
13.2308	0.35581
13.2491	0.353887
13.2675	0.340424
13.2858	0.423126
13.3041	0.405816
13.3225	0.325038
13.3408	0.332731
13.3592	0.348117
13.3775	0.325038
13.3958	0.36735
13.4142	0.321191
13.4325	0.376967
13.4508	0.36735
13.4692	0.357734
13.4875	0.326961
13.5058	0.357734
13.5242	0.413509
13.5425	0.313498
13.5609	0.37312
13.5792	0.375043
13.5975	0.303881
13.6159	0.351964
13.6342	0.37312
13.6525	0.371197
13.6709	0.317344
13.6892	0.311574
13.7076	0.309651
13.7259	0.315421
13.7442	0.340424
13.7626	0.382736
13.7809	0.36158
13.7992	0.34427
13.8176	0.382736
13.8359	0.35581
13.8542	0.346194
13.8726	0.342347
13.8909	0.375043
13.9093	0.340424
13.9276	0.35004
13.9459	0.332731
13.9643	0.363503
13.9826	0.351964
14.0009	0.325038
14.0193	0.305805
14.0376	0.375043
14.056	0.336577
14.0743	0.382736
14.0926	0.342347
14.111	0.35581
14.1293	0.369273
14.1476	0.365427
14.166	0.36158
14.1843	0.334654
14.2026	0.411586
14.221	0.363503
14.2393	0.348117
14.2577	0.336577
14.276	0.37312
14.2943	0.38466
14.3127	0.376967
14.331	0.35004
14.3493	0.400046
14.3677	0.426972
14.386	0.405816
14.4044	0.403893
14.4227	0.386583
14.441	0.342347
14.4594	0.446205
14.4777	0.394276
14.496	0.459668
14.5144	0.461592
14.5327	0.448129
14.5511	0.450052
14.5694	0.423126
14.5877	0.438512
14.6061	0.415433
14.6244	0.463515
14.6427	0.434666
14.6611	0.440435
14.6794	0.428896
14.6977	0.401969
14.7161	0.413509
14.7344	0.405816
14.7528	0.401969
14.7711	0.35581
14.7894	0.382736
14.8078	0.351964
14.8261	0.357734
14.8444	0.39043
14.8628	0.36735
14.8811	0.326961
14.8995	0.376967
14.9178	0.338501
14.9361	0.334654
14.9545	0.325038
14.9728	0.346194
14.9911	0.346194
15.0095	0.388506
15.0278	0.317344
15.0461	0.346194
15.0645	0.288495
15.0828	0.348117
15.1012	0.353887
15.1195	0.328884
15.1378	0.363503
15.1562	0.307728
15.1745	0.35004
15.1928	0.357734
15.2112	0.351964
15.2295	0.382736
15.2479	0.342347
15.2662	0.35581
15.2845	0.315421
15.3029	0.37889
15.3212	0.365427
15.3395	0.305805
15.3579	0.346194
15.3762	0.342347
15.3945	0.292341
15.4129	0.35004
15.4312	0.382736
15.4496	0.330807
15.4679	0.307728
15.4862	0.346194
15.5046	0.359657
15.5229	0.300035
15.5412	0.394276
15.5596	0.346194
15.5779	0.35581
15.5963	0.365427
15.6146	0.336577
15.6329	0.332731
15.6513	0.351964
15.6696	0.363503
15.6879	0.382736
15.7063	0.403893
15.7246	0.450052
15.7429	0.450052
15.7613	0.450052
15.7796	0.405816
15.798	0.517367
15.8163	0.496211
15.8346	0.471208
15.853	0.509674
15.8713	0.469285
15.8896	0.492365
15.908	0.544294
15.9263	0.567373
15.9447	0.459668
15.963	0.55968
15.9813	0.494288
15.9997	0.540447
16.018	0.436589
16.0363	0.451975
16.0547	0.490441
16.073	0.423126
16.0914	0.37889
16.1097	0.382736
16.128	0.403893
16.1464	0.409663
16.1647	0.375043
16.183	0.36735
16.2014	0.415433
16.2197	0.376967
16.238	0.403893
16.2564	0.363503
16.2747	0.363503
16.2931	0.3962
16.3114	0.35004
16.3297	0.34427
16.3481	0.3962
16.3664	0.411586
16.3847	0.36158
16.4031	0.36735
16.4214	0.394276
16.4398	0.336577
16.4581	0.325038
16.4764	0.392353
16.4948	0.380813
16.5131	0.34427
16.5314	0.376967
16.5498	0.346194
16.5681	0.336577
16.5864	0.309651
16.6048	0.338501
16.6231	0.36735
16.6415	0.38466
16.6598	0.37312
16.6781	0.348117
16.6965	0.338501
16.7148	0.332731
16.7331	0.38466
16.7515	0.423126
16.7698	0.342347
16.7882	0.36158
16.8065	0.388506
16.8248	0.382736
16.8432	0.346194
16.8615	0.413509
16.8798	0.363503
16.8982	0.432742
16.9165	0.353887
16.9348	0.398123
16.9532	0.375043
16.9715	0.386583
16.9899	0.405816
17.0082	0.38466
17.0265	0.371197
17.0449	0.3962
17.0632	0.326961
17.0815	0.346194
17.0999	0.426972
17.1182	0.37889
17.1366	0.432742
17.1549	0.336577
17.1732	0.380813
17.1916	0.342347
17.2099	0.430819
17.2282	0.409663
17.2466	0.371197
17.2649	0.419279
17.2832	0.436589
17.3016	0.426972
17.3199	0.3962
17.3383	0.423126
17.3566	0.432742
17.3749	0.444282
17.3933	0.509674
17.4116	0.425049
17.4299	0.448129
17.4483	0.509674
17.4666	0.515444
17.485	0.546217
17.5033	0.54237
17.5216	0.517367
17.54	0.594299
17.5583	0.600069
17.5766	0.57699
17.595	0.611609
17.6133	0.509674
17.6316	0.526984
17.65	0.53083
17.6683	0.521214
17.6867	0.492365
17.705	0.517367
17.7233	0.546217
17.7417	0.492365
17.76	0.519291
17.7783	0.625072
17.7967	0.609686
17.815	0.58276
17.8334	0.601993
17.8517	0.72316
17.87	0.736623
17.8884	0.71739
17.9067	0.796246
17.925	0.807786
17.9434	0.825095
17.9617	0.977036
17.9801	0.892411
17.9984	0.773166
18.0167	0.777013
18.0351	0.713544
18.0534	0.632765
18.0717	0.56545
18.0901	0.5366
18.1084	0.54237
18.1267	0.484671
18.1451	0.503904
18.1634	0.486595
18.1818	0.513521
18.2001	0.417356
18.2184	0.461592
18.2368	0.459668
18.2551	0.494288
18.2734	0.486595
18.2918	0.436589
18.3101	0.403893
18.3285	0.421202
18.3468	0.478901
18.3651	0.444282
18.3835	0.492365
18.4018	0.521214
18.4201	0.451975
18.4385	0.507751
18.4568	0.409663
18.4751	0.503904
18.4935	0.523137
18.5118	0.467362
18.5302	0.451975
18.5485	0.482748
18.5668	0.517367
18.5852	0.475055
18.6035	0.486595
18.6218	0.475055
18.6402	0.500058
18.6585	0.513521
18.6769	0.532754
18.6952	0.496211
18.7135	0.457745
18.7319	0.486595
18.7502	0.603916
18.7685	0.532754
18.7869	0.501981
18.8052	0.550063
18.8235	0.546217
18.8419	0.57122
18.8602	0.546217
18.8786	0.580836
18.8969	0.594299
18.9152	0.653922
18.9336	0.603916
18.9519	0.640459
18.9702	0.696234
18.9886	0.665461
19.0069	0.767396
19.0253	0.815479
19.0436	0.780859
19.0619	0.969343
19.0803	0.977036
19.0986	1.04627
19.1169	1.18475
19.1353	1.30784
19.1536	1.56557
19.1719	1.90599
19.1903	2.04254
19.2086	2.40605
19.227	2.97919
19.2453	3.40232
19.2636	4.26972
19.282	4.82171
19.3003	5.75836
19.3186	6.21803
19.337	6.45267
19.3553	6.69116
19.3737	6.4392
19.392	6.09878
19.4103	5.62565
19.4287	4.87364
19.447	4.35627
19.4653	3.55233
19.4837	3.03881
19.502	2.45798
19.5204	2.2368
19.5387	1.69443
19.557	1.55403
19.5754	1.41362
19.5937	1.29053
19.612	1.16744
19.6304	1.10397
19.6487	1.05781
19.667	0.948186
19.6854	0.792399
19.7037	0.834712
19.7221	0.765473
19.7404	0.76932
19.7587	0.661615
19.7771	0.673155
19.7954	0.686618
19.8137	0.669308
19.8321	0.626995
19.8504	0.623149
19.8688	0.534677
19.8871	0.519291
19.9054	0.55391
19.9238	0.584683
19.9421	0.56545
19.9604	0.588529
19.9788	0.500058
19.9971	0.5366
20.0154	0.569296
20.0338	0.525061
20.0521	0.525061
20.0705	0.492365
20.0888	0.532754
20.1071	0.511597
20.1255	0.563527
20.1438	0.509674
20.1621	0.521214
20.1805	0.465438
20.1988	0.532754
20.2172	0.5366
20.2355	0.482748
20.2538	0.509674
20.2722	0.494288
20.2905	0.53083
20.3088	0.540447
20.3272	0.540447
20.3455	0.55391
20.3638	0.53083
20.3822	0.528907
20.4005	0.555833
20.4189	0.513521
20.4372	0.503904
20.4555	0.521214
20.4739	0.54237
20.4922	0.557757
20.5105	0.592376
20.5289	0.619302
20.5472	0.609686
20.5656	0.588529
20.5839	0.694311
20.6022	0.642382
20.6206	0.759703
20.6389	0.713544
20.6572	0.798169
20.6756	0.888564
20.6939	0.875101
20.7122	0.923183
20.7306	0.969343
20.7489	0.880871
20.7673	1.05589
20.7856	0.948186
20.8039	0.871254
20.8223	0.742393
20.8406	0.744317
20.8589	0.657768
20.8773	0.650075
20.8956	0.557757
20.914	0.665461
20.9323	0.55968
20.9506	0.601993
20.969	0.617379
20.9873	0.609686
21.0056	0.586606
21.024	0.578913
21.0423	0.586606
21.0607	0.54237
21.079	0.596223
21.0973	0.55968
21.1157	0.532754
21.134	0.561603
21.1523	0.540447
21.1707	0.498134
21.189	0.511597
21.2073	0.550063
21.2257	0.525061
21.244	0.526984
21.2624	0.54814
21.2807	0.55968
21.299	0.592376
21.3174	0.584683
21.3357	0.611609
21.354	0.625072
21.3724	0.625072
21.3907	0.617379
21.4091	0.634689
21.4274	0.688541
21.4457	0.688541
21.4641	0.678924
21.4824	0.715467
21.5007	0.844328
21.5191	0.827018
21.5374	0.911644
21.5557	0.919337
21.5741	1.1059
21.5924	1.03858
21.6108	1.18668
21.6291	1.37901
21.6474	1.30207
21.6658	1.42901
21.6841	1.45209
21.7024	1.40785
21.7208	1.49633
21.7391	1.33092
21.7575	1.29438
21.7758	1.35785
21.7941	1.19822
21.8125	1.2463
21.8308	1.14244
21.8491	1.17321
21.8675	1.2386
21.8858	1.17321
21.9041	1.1559
21.9225	1.14629
21.9408	1.15013
21.9592	1.12513
21.9775	1.16167
21.9958	1.17129
22.0142	1.07705
22.0325	1.11936
22.0508	0.971266
22.0692	0.994345
22.0875	0.828942
22.1059	0.963573
22.1242	0.90395
22.1425	0.869331
22.1609	0.925107
22.1792	0.873178
22.1975	0.827018
22.2159	0.832788
22.2342	0.815479
22.2525	0.796246
22.2709	0.827018
22.2892	0.705851
22.3076	0.7347
22.3259	0.700081
22.3442	0.57699
22.3626	0.615456
22.3809	0.594299
22.3992	0.596223
22.4176	0.573143
22.4359	0.519291
22.4543	0.513521
22.4726	0.498134
22.4909	0.478901
22.5093	0.503904
22.5276	0.442359
22.5459	0.486595
22.5643	0.425049
22.5826	0.480825
22.6009	0.488518
22.6193	0.450052
22.6376	0.436589
22.656	0.484671
22.6743	0.451975
22.6926	0.523137
22.711	0.534677
22.7293	0.461592
22.7476	0.459668
22.766	0.513521
22.7843	0.419279
22.8027	0.521214
22.821	0.461592
22.8393	0.507751
22.8577	0.484671
22.876	0.498134
22.8943	0.475055
22.9127	0.490441
22.931	0.490441
22.9494	0.551987
22.9677	0.511597
22.986	0.557757
23.0044	0.550063
23.0227	0.551987
23.041	0.575066
23.0594	0.663538
23.0777	0.700081
23.096	0.692388
23.1144	0.750087
23.1327	0.852021
23.1511	0.873178
23.1694	0.9328
23.1877	1.05974
23.2061	1.03089
23.2244	1.05589
23.2427	1.0155
23.2611	0.882794
23.2794	0.869331
23.2978	0.75778
23.3161	0.680848
23.3344	0.634689
23.3528	0.609686
23.3711	0.640459
23.3894	0.575066
23.4078	0.515444
23.4261	0.569296
23.4444	0.453899
23.4628	0.494288
23.4811	0.494288
23.4995	0.478901
23.5178	0.467362
23.5361	0.428896
23.5545	0.398123
23.5728	0.419279
23.5911	0.440435
23.6095	0.463515
23.6278	0.461592
23.6462	0.448129
23.6645	0.428896
23.6828	0.461592
23.7012	0.411586
23.7195	0.457745
23.7378	0.398123
23.7562	0.480825
23.7745	0.473132
23.7928	0.513521
23.8112	0.3962
23.8295	0.459668
23.8479	0.501981
23.8662	0.498134
23.8845	0.546217
23.9029	0.532754
23.9212	0.54237
23.9395	0.598146
23.9579	0.561603
23.9762	0.584683
23.9946	0.634689
24.0129	0.669308
24.0312	0.694311
24.0496	0.646228
24.0679	0.661615
24.0862	0.7347
24.1046	0.782783
24.1229	0.715467
24.1412	0.821249
24.1596	0.713544
24.1779	0.74624
24.1963	0.794322
24.2146	0.834712
24.2329	0.792399
24.2513	0.744317
24.2696	0.863561
24.2879	0.894334
24.3063	0.896257
24.3246	0.942416
24.343	0.990499
24.3613	0.961649
24.3796	0.93857
24.398	0.940493
24.4163	0.882794
24.4346	0.771243
24.453	0.74047
24.4713	0.75201
24.4897	0.677001
24.508	0.678924
24.5263	0.650075
24.5447	0.588529
24.563	0.563527
24.5813	0.567373
24.5997	0.569296
24.618	0.55391
24.6363	0.498134
24.6547	0.519291
24.673	0.546217
24.6914	0.492365
24.7097	0.467362
24.728	0.526984
24.7464	0.5366
24.7647	0.461592
24.783	0.455822
24.8014	0.475055
24.8197	0.426972
24.8381	0.453899
24.8564	0.451975
24.8747	0.442359
24.8931	0.423126
24.9114	0.419279
24.9297	0.415433
24.9481	0.448129
24.9664	0.432742
24.9847	0.386583
25.0031	0.425049
25.0214	0.465438
25.0398	0.440435
25.0581	0.423126
25.0764	0.446205
25.0948	0.440435
25.1131	0.413509
25.1314	0.496211
25.1498	0.3962
25.1681	0.467362
25.1865	0.436589
25.2048	0.53083
25.2231	0.525061
25.2415	0.551987
25.2598	0.609686
25.2781	0.55391
25.2965	0.694311
25.3148	0.617379
25.3331	0.688541
25.3515	0.778936
25.3698	0.838558
25.3882	0.900104
25.4065	0.978959
25.4248	1.08666
25.4432	1.07897
25.4615	1.00781
25.4798	1.04243
25.4982	0.973189
25.5165	1.00973
25.5349	0.917414
25.5532	0.821249
25.5715	0.852021
25.5899	0.759703
25.6082	0.648152
25.6265	0.609686
25.6449	0.640459
25.6632	0.567373
25.6815	0.496211
25.6999	0.457745
25.7182	0.507751
25.7366	0.482748
25.7549	0.450052
25.7732	0.444282
25.7916	0.525061
25.8099	0.448129
25.8282	0.511597
25.8466	0.413509
25.8649	0.438512
25.8833	0.401969
25.9016	0.394276
25.9199	0.446205
25.9383	0.37312
25.9566	0.39043
25.9749	0.38466
25.9933	0.388506
26.0116	0.346194
26.0299	0.365427
26.0483	0.305805
26.0666	0.353887
26.085	0.325038
26.1033	0.340424
26.1216	0.332731
26.14	0.34427
26.1583	0.386583
26.1766	0.382736
26.195	0.35004
26.2133	0.394276
26.2317	0.326961
26.25	0.388506
26.2683	0.348117
26.2867	0.400046
26.305	0.400046
26.3233	0.35581
26.3417	0.434666
26.36	0.425049
26.3784	0.425049
26.3967	0.457745
26.415	0.453899
26.4334	0.494288
26.4517	0.486595
26.47	0.511597
26.4884	0.476978
26.5067	0.436589
26.525	0.465438
26.5434	0.467362
26.5617	0.513521
26.5801	0.473132
26.5984	0.457745
26.6167	0.511597
26.6351	0.544294
26.6534	0.532754
26.6717	0.430819
26.6901	0.505828
26.7084	0.492365
26.7268	0.473132
26.7451	0.450052
26.7634	0.411586
26.7818	0.419279
26.8001	0.411586
26.8184	0.463515
26.8368	0.436589
26.8551	0.415433
26.8734	0.382736
26.8918	0.305805
26.9101	0.386583
26.9285	0.415433
26.9468	0.428896
26.9651	0.411586
26.9835	0.346194
27.0018	0.353887
27.0201	0.37312
27.0385	0.409663
27.0568	0.36735
27.0752	0.403893
27.0935	0.444282
27.1118	0.432742
27.1302	0.450052
27.1485	0.438512
27.1668	0.532754
27.1852	0.455822
27.2035	0.517367
27.2218	0.511597
27.2402	0.488518
27.2585	0.528907
27.2769	0.54237
27.2952	0.638535
27.3135	0.613532
27.3319	0.650075
27.3502	0.56545
27.3685	0.598146
27.3869	0.55968
27.4052	0.615456
27.4236	0.526984
27.4419	0.563527
27.4602	0.55391
27.4786	0.592376
27.4969	0.580836
27.5152	0.53083
27.5336	0.534677
27.5519	0.567373
27.5702	0.53083
27.5886	0.484671
27.6069	0.442359
27.6253	0.501981
27.6436	0.444282
27.6619	0.432742
27.6803	0.415433
27.6986	0.357734
27.7169	0.332731
27.7353	0.376967
27.7536	0.328884
27.772	0.305805
27.7903	0.326961
27.8086	0.37312
27.827	0.321191
27.8453	0.301958
27.8636	0.348117
27.882	0.328884
27.9003	0.351964
27.9187	0.323114
27.937	0.375043
27.9553	0.371197
27.9737	0.309651
27.992	0.369273
28.0103	0.346194
28.0287	0.380813
28.047	0.357734
28.0653	0.35004
28.0837	0.371197
28.102	0.392353
28.1204	0.405816
28.1387	0.451975
28.157	0.446205
28.1754	0.500058
28.1937	0.501981
28.212	0.505828
28.2304	0.494288
28.2487	0.56545
28.2671	0.544294
28.2854	0.586606
28.3037	0.594299
28.3221	0.567373
28.3404	0.509674
28.3587	0.459668
28.3771	0.475055
28.3954	0.496211
28.4137	0.484671
28.4321	0.434666
28.4504	0.434666
28.4688	0.401969
28.4871	0.35581
28.5054	0.332731
28.5238	0.444282
28.5421	0.3962
28.5604	0.386583
28.5788	0.36735
28.5971	0.36735
28.6155	0.369273
28.6338	0.326961
28.6521	0.348117
28.6705	0.405816
28.6888	0.450052
28.7071	0.37889
28.7255	0.38466
28.7438	0.421202
28.7621	0.37312
28.7805	0.338501
28.7988	0.328884
28.8172	0.311574
28.8355	0.296188
28.8538	0.311574
28.8722	0.311574
28.8905	0.315421
28.9088	0.330807
28.9272	0.305805
28.9455	0.300035
28.9639	0.300035
28.9822	0.296188
29.0005	0.315421
29.0189	0.280802
29.0372	0.309651
29.0555	0.307728
29.0739	0.321191
29.0922	0.265415
29.1105	0.315421
29.1289	0.305805
29.1472	0.332731
29.1656	0.338501
29.1839	0.307728
29.2022	0.315421
29.2206	0.309651
29.2389	0.376967
29.2572	0.334654
29.2756	0.325038
29.2939	0.36735
29.3123	0.386583
29.3306	0.430819
29.3489	0.37889
29.3673	0.455822
29.3856	0.54237
29.4039	0.555833
29.4223	0.569296
29.4406	0.601993
29.459	0.598146
29.4773	0.653922
29.4956	0.626995
29.514	0.573143
29.5323	0.563527
29.5506	0.56545
29.569	0.534677
29.5873	0.521214
29.6056	0.486595
29.624	0.492365
29.6423	0.438512
29.6607	0.423126
29.679	0.421202
29.6973	0.405816
29.7157	0.376967
29.734	0.357734
29.7523	0.338501
29.7707	0.332731
29.789	0.321191
29.8074	0.309651
29.8257	0.298111
29.844	0.309651
29.8624	0.300035
29.8807	0.263492
29.899	0.282725
29.9174	0.311574
29.9357	0.290418
29.954	0.265415
29.9724	0.271185
29.9907	0.255799
30.0091	0.290418
30.0274	0.267339
30.0457	0.276955
30.0641	0.280802
30.0824	0.263492
30.1007	0.276955
30.1191	0.271185
30.1374	0.275032
30.1558	0.261569
30.1741	0.305805
30.1924	0.276955
30.2108	0.240412
30.2291	0.269262
30.2474	0.253875
30.2658	0.248106
30.2841	0.280802
30.3024	0.265415
30.3208	0.263492
30.3391	0.219256
30.3575	0.261569
30.3758	0.255799
30.3941	0.276955
30.4125	0.251952
30.4308	0.257722
30.4491	0.269262
30.4675	0.275032
30.4858	0.265415
30.5042	0.263492
30.5225	0.305805
30.5408	0.251952
30.5592	0.273108
30.5775	0.251952
30.5958	0.315421
30.6142	0.300035
30.6325	0.253875
30.6508	0.298111
30.6692	0.294265
30.6875	0.286572
30.7059	0.232719
30.7242	0.259645
30.7425	0.236566
30.7609	0.307728
30.7792	0.269262
30.7975	0.301958
30.8159	0.286572
30.8342	0.232719
30.8526	0.311574
30.8709	0.248106
30.8892	0.276955
30.9076	0.282725
30.9259	0.309651
30.9442	0.309651
30.9626	0.278878
30.9809	0.288495
30.9992	0.315421
31.0176	0.317344
31.0359	0.37312
31.0543	0.303881
31.0726	0.351964
31.0909	0.357734
31.1093	0.392353
31.1276	0.388506
31.1459	0.35581
31.1643	0.411586
31.1826	0.400046
31.201	0.484671
31.2193	0.511597
31.2376	0.5366
31.256	0.56545
31.2743	0.601993
31.2926	0.594299
31.311	0.540447
31.3293	0.550063
31.3477	0.465438
31.366	0.461592
31.3843	0.428896
31.4027	0.407739
31.421	0.436589
31.4393	0.357734
31.4577	0.348117
31.476	0.388506
31.4943	0.405816
31.5127	0.400046
31.531	0.334654
31.5494	0.353887
31.5677	0.301958
31.586	0.336577
31.6044	0.244259
31.6227	0.276955
31.641	0.317344
31.6594	0.253875
31.6777	0.261569
31.6961	0.253875
31.7144	0.275032
31.7327	0.261569
31.7511	0.275032
31.7694	0.211563
31.7877	0.228873
31.8061	0.282725
31.8244	0.257722
31.8427	0.251952
31.8611	0.261569
31.8794	0.261569
31.8978	0.265415
31.9161	0.261569
31.9344	0.290418
31.9528	0.259645
31.9711	0.286572
31.9894	0.278878
32.0078	0.301958
32.0261	0.278878
32.0445	0.296188
32.0628	0.338501
32.0811	0.317344
32.0995	0.365427
32.1178	0.39043
32.1361	0.388506
32.1545	0.421202
32.1728	0.36735
32.1911	0.319268
32.2095	0.388506
32.2278	0.371197
32.2462	0.403893
32.2645	0.340424
32.2828	0.376967
32.3012	0.348117
32.3195	0.336577
32.3378	0.321191
32.3562	0.290418
32.3745	0.282725
32.3929	0.280802
32.4112	0.248106
32.4295	0.226949
32.4479	0.240412
32.4662	0.263492
32.4845	0.244259
32.5029	0.253875
32.5212	0.207716
32.5395	0.248106
32.5579	0.261569
32.5762	0.263492
32.5946	0.215409
32.6129	0.267339
32.6312	0.240412
32.6496	0.236566
32.6679	0.244259
32.6862	0.255799
32.7046	0.271185
32.7229	0.276955
32.7413	0.236566
32.7596	0.263492
32.7779	0.200023
32.7963	0.207716
32.8146	0.215409
32.8329	0.223103
32.8513	0.217333
32.8696	0.228873
32.888	0.205793
32.9063	0.217333
32.9246	0.232719
32.943	0.261569
32.9613	0.207716
32.9796	0.205793
32.998	0.196176
33.0163	0.20387
33.0346	0.230796
33.053	0.223103
33.0713	0.205793
33.0897	0.213486
33.108	0.201946
33.1263	0.20964
33.1447	0.205793
33.163	0.211563
33.1813	0.217333
33.1997	0.250029
33.218	0.219256
33.2364	0.238489
33.2547	0.194253
33.273	0.215409
33.2914	0.211563
33.3097	0.246182
33.328	0.244259
33.3464	0.257722
33.3647	0.188483
33.383	0.223103
33.4014	0.253875
33.4197	0.219256
33.4381	0.223103
33.4564	0.244259
33.4747	0.242336
33.4931	0.250029
33.5114	0.265415
33.5297	0.280802
33.5481	0.261569
33.5664	0.282725
33.5848	0.280802
33.6031	0.288495
33.6214	0.273108
33.6398	0.278878
33.6581	0.301958
33.6764	0.342347
33.6948	0.371197
33.7131	0.334654
33.7314	0.36158
33.7498	0.336577
33.7681	0.330807
33.7865	0.326961
33.8048	0.278878
33.8231	0.300035
33.8415	0.267339
33.8598	0.267339
33.8781	0.288495
33.8965	0.251952
33.9148	0.250029
33.9332	0.232719
33.9515	0.251952
33.9698	0.219256
33.9882	0.253875
34.0065	0.230796
34.0248	0.1981
34.0432	0.251952
34.0615	0.225026
34.0798	0.232719
34.0982	0.234642
34.1165	0.196176
34.1349	0.184637
34.1532	0.234642
34.1715	0.238489
34.1899	0.1981
34.2082	0.217333
34.2265	0.226949
34.2449	0.251952
34.2632	0.205793
34.2816	0.263492
34.2999	0.248106
34.3182	0.223103
34.3366	0.228873
34.3549	0.194253
34.3732	0.223103
34.3916	0.20964
34.4099	0.1981
34.4282	0.20387
34.4466	0.219256
34.4649	0.232719
34.4833	0.188483
34.5016	0.219256
34.5199	0.230796
34.5383	0.207716
34.5566	0.226949
34.5749	0.221179
34.5933	0.171174
34.6116	0.223103
34.63	0.223103
34.6483	0.284648
34.6666	0.215409
34.685	0.232719
34.7033	0.215409
34.7216	0.250029
34.74	0.226949
34.7583	0.223103
34.7767	0.230796
34.795	0.221179
34.8133	0.221179
34.8317	0.228873
34.85	0.1981
34.8683	0.225026
34.8867	0.201946
34.905	0.253875
34.9233	0.236566
34.9417	0.267339
34.96	0.205793
34.9784	0.207716
34.9967	0.246182
35.015	0.267339
35.0334	0.223103
35.0517	0.207716
35.07	0.240412
35.0884	0.219256
35.1067	0.246182
35.1251	0.234642
35.1434	0.276955
35.1617	0.253875
35.1801	0.236566
35.1984	0.215409
35.2167	0.244259
35.2351	0.248106
35.2534	0.282725
35.2717	0.278878
35.2901	0.246182
35.3084	0.330807
35.3268	0.255799
35.3451	0.292341
35.3634	0.317344
35.3818	0.328884
35.4001	0.311574
35.4184	0.276955
35.4368	0.330807
35.4551	0.300035
35.4735	0.326961
35.4918	0.317344
35.5101	0.334654
35.5285	0.296188
35.5468	0.255799
35.5651	0.280802
35.5835	0.232719
35.6018	0.282725
35.6201	0.251952
35.6385	0.242336
35.6568	0.269262
35.6752	0.269262
35.6935	0.261569
35.7118	0.234642
35.7302	0.253875
35.7485	0.292341
35.7668	0.223103
35.7852	0.240412
35.8035	0.230796
35.8219	0.225026
35.8402	0.211563
35.8585	0.248106
35.8769	0.251952
35.8952	0.213486
35.9135	0.223103
35.9319	0.238489
35.9502	0.226949
35.9685	0.248106
35.9869	0.221179
36.0052	0.230796
36.0236	0.223103
36.0419	0.244259
36.0602	0.230796
36.0786	0.242336
36.0969	0.246182
36.1152	0.223103
36.1336	0.246182
36.1519	0.251952
36.1703	0.236566
36.1886	0.269262
36.2069	0.305805
36.2253	0.290418
36.2436	0.298111
36.2619	0.317344
36.2803	0.328884
36.2986	0.269262
36.317	0.278878
36.3353	0.330807
36.3536	0.248106
36.372	0.265415
36.3903	0.284648
36.4086	0.292341
36.427	0.242336
36.4453	0.288495
36.4636	0.259645
36.482	0.225026
36.5003	0.18656
36.5187	0.248106
36.537	0.255799
36.5553	0.215409
36.5737	0.184637
36.592	0.232719
36.6103	0.242336
36.6287	0.211563
36.647	0.228873
36.6654	0.200023
36.6837	0.194253
36.702	0.225026
36.7204	0.20964
36.7387	0.236566
36.757	0.230796
36.7754	0.232719
36.7937	0.20387
36.812	0.219256
36.8304	0.20964
36.8487	0.223103
36.8671	0.194253
36.8854	0.194253
36.9037	0.205793
36.9221	0.176943
36.9404	0.213486
36.9587	0.213486
36.9771	0.171174
36.9954	0.200023
37.0138	0.213486
37.0321	0.219256
37.0504	0.201946
37.0688	0.171174
37.0871	0.207716
37.1054	0.226949
37.1238	0.259645
37.1421	0.1981
37.1604	0.240412
37.1788	0.196176
37.1971	0.217333
37.2155	0.1981
37.2338	0.19233
37.2521	0.148094
37.2705	0.207716
37.2888	0.20387
37.3071	0.211563
37.3255	0.215409
37.3438	0.182713
37.3622	0.1981
37.3805	0.16348
37.3988	0.188483
37.4172	0.228873
37.4355	0.18079
37.4538	0.232719
37.4722	0.221179
37.4905	0.205793
37.5088	0.219256
37.5272	0.257722
37.5455	0.225026
37.5639	0.213486
37.5822	0.207716
37.6005	0.182713
37.6189	0.219256
37.6372	0.225026
37.6555	0.215409
37.6739	0.226949
37.6922	0.273108
37.7106	0.276955
37.7289	0.240412
37.7472	0.253875
37.7656	0.255799
37.7839	0.286572
37.8022	0.284648
37.8206	0.271185
37.8389	0.282725
37.8573	0.261569
37.8756	0.267339
37.8939	0.240412
37.9123	0.250029
37.9306	0.1981
37.9489	0.246182
37.9673	0.234642
37.9856	0.219256
38.0039	0.19233
38.0223	0.242336
38.0406	0.238489
38.059	0.20387
38.0773	0.217333
38.0956	0.207716
38.114	0.211563
38.1323	0.201946
38.1506	0.223103
38.169	0.176943
38.1873	0.207716
38.2057	0.176943
38.224	0.18656
38.2423	0.234642
38.2607	0.194253
38.279	0.205793
38.2973	0.244259
38.3157	0.196176
38.334	0.215409
38.3523	0.244259
38.3707	0.246182
38.389	0.205793
38.4074	0.246182
38.4257	0.215409
38.444	0.217333
38.4624	0.226949
38.4807	0.188483
38.499	0.223103
38.5174	0.230796
38.5357	0.269262
38.5541	0.265415
38.5724	0.280802
38.5907	0.265415
38.6091	0.273108
38.6274	0.261569
38.6457	0.244259
38.6641	0.259645
38.6824	0.305805
38.7007	0.244259
38.7191	0.257722
38.7374	0.248106
38.7558	0.259645
38.7741	0.230796
38.7924	0.230796
38.8108	0.225026
38.8291	0.232719
38.8474	0.232719
38.8658	0.236566
38.8841	0.240412
38.9025	0.228873
38.9208	0.20964
38.9391	0.194253
38.9575	0.20964
38.9758	0.251952
38.9941	0.223103
39.0125	0.232719
39.0308	0.19233
39.0491	0.259645
39.0675	0.234642
39.0858	0.253875
39.1042	0.250029
39.1225	0.221179
39.1408	0.244259
39.1592	0.261569
39.1775	0.282725
39.1958	0.301958
39.2142	0.282725
39.2325	0.300035
39.2509	0.267339
39.2692	0.309651
39.2875	0.284648
39.3059	0.284648
39.3242	0.296188
39.3425	0.328884
39.3609	0.282725
39.3792	0.334654
39.3975	0.263492
39.4159	0.273108
39.4342	0.273108
39.4526	0.276955
39.4709	0.269262
39.4892	0.265415
39.5076	0.228873
39.5259	0.242336
39.5442	0.248106
39.5626	0.251952
39.5809	0.250029
39.5993	0.219256
39.6176	0.213486
39.6359	0.238489
39.6543	0.223103
39.6726	0.20387
39.6909	0.226949
39.7093	0.213486
39.7276	0.244259
39.746	0.215409
39.7643	0.223103
39.7826	0.194253
39.801	0.219256
39.8193	0.225026
39.8376	0.238489
39.856	0.250029
39.8743	0.200023
39.8926	0.194253
39.911	0.213486
39.9293	0.244259
39.9477	0.225026
39.966	0.217333
39.9843	0.253875
40.0027	0.219256
40.021	0.221179
40.0393	0.1981
40.0577	0.230796
40.076	0.225026
40.0944	0.248106
40.1127	0.1981
40.131	0.246182
40.1494	0.242336
40.1677	0.161557
40.186	0.207716
40.2044	0.194253
40.2227	0.205793
40.241	0.201946
40.2594	0.20387
40.2777	0.211563
40.2961	0.240412
40.3144	0.219256
40.3327	0.200023
40.3511	0.205793
40.3694	0.161557
40.3877	0.200023
40.4061	0.225026
40.4244	0.217333
40.4428	0.1981
40.4611	0.200023
40.4794	0.238489
40.4978	0.244259
40.5161	0.253875
40.5344	0.223103
[truncated: 1,056 more rows]

## Sheet: Cooling 165 °C
2theta	Intensity
3.89731	1.50402
3.91565	1.43286
3.93399	1.47325
3.95232	1.39055
3.97066	1.3867
3.989	1.42901
4.00733	1.35785
4.02567	1.45209
4.04401	1.48286
4.06234	1.40593
4.08068	1.49825
4.09902	1.28092
4.11735	1.45017
4.13569	1.38862
4.15403	1.36747
4.17237	1.40785
4.1907	1.30015
4.20904	1.41555
4.22738	1.44632
4.24571	1.31554
4.26405	1.33669
4.28239	1.26745
4.30072	1.3617
4.31906	1.3617
4.3374	1.32708
4.35573	1.36554
4.37407	1.32323
4.39241	1.36362
4.41075	1.32515
4.42908	1.24053
4.44742	1.25976
4.46576	1.26745
4.48409	1.34823
4.50243	1.23283
4.52077	1.28284
4.5391	1.28092
4.55744	1.32323
4.57578	1.18091
4.59411	1.30592
4.61245	1.24245
4.63079	1.21552
4.64913	1.2386
4.66746	1.30015
4.6858	1.21168
4.70414	1.30784
4.72247	1.26553
4.74081	1.2713
4.75915	1.23283
4.77748	1.22322
4.79582	1.16552
4.81416	1.24053
4.83249	1.24245
4.85083	1.15206
4.86917	1.20783
4.8875	1.16167
4.90584	1.17514
4.92418	1.24437
4.94252	1.19822
4.96085	1.19822
4.97919	1.18091
4.99753	1.19245
5.01586	1.1636
5.0342	1.09051
5.05254	1.13859
5.07087	1.14629
5.08921	1.24437
5.10755	1.14244
5.12588	1.06551
5.14422	1.08474
5.16256	1.05781
5.1809	1.2386
5.19923	1.15013
5.21757	1.18283
5.23591	1.1886
5.25424	1.14436
5.27258	1.14436
5.29092	1.1559
5.30925	1.11551
5.32759	1.13282
5.34593	1.13859
5.36426	1.13282
5.3826	1.15206
5.40094	1.17514
5.41927	1.15206
5.43761	1.14244
5.45595	1.10782
5.47429	1.07705
5.49262	1.14821
5.51096	1.11551
5.5293	1.13667
5.54763	1.1636
5.56597	1.11744
5.58431	1.14052
5.60264	1.14244
5.62098	1.06358
5.63932	1.07705
5.65765	1.16937
5.67599	1.08282
5.69433	1.15013
5.71267	1.19822
5.731	1.1559
5.74934	1.17898
5.76768	1.15975
5.78601	1.0155
5.80435	1.16744
5.82269	1.20591
5.84102	1.2136
5.85936	1.21745
5.8777	1.22322
5.89603	1.28476
5.91437	1.20975
5.93271	1.25399
5.95104	1.34054
5.96938	1.40785
5.98772	1.36362
6.00606	1.33862
6.02439	1.38862
6.04273	1.304
6.06107	1.36747
6.0794	1.5021
6.09774	1.43478
6.11608	1.42516
6.13441	1.56941
6.15275	1.54826
6.17109	1.64634
6.18942	1.63865
6.20776	1.70789
6.2261	1.80405
6.24444	1.80598
6.26277	1.88483
6.28111	2.01177
6.29945	2.09063
6.31778	2.00792
6.33612	2.1214
6.35446	2.23295
6.37279	2.24449
6.39113	2.35604
6.40947	2.53875
6.4278	2.61569
6.44614	2.82533
6.46448	2.78878
6.48282	3.05997
6.50115	3.04074
6.51949	3.18691
6.53783	3.52348
6.55616	3.6985
6.5745	3.77736
6.59284	4.09663
6.61117	4.36589
6.62951	4.57937
6.64785	4.8371
6.66618	5.22945
6.68452	5.55833
6.70286	5.75643
6.72119	6.1584
6.73953	6.71039
6.75787	7.24891
6.77621	7.69897
6.79454	8.02977
6.81288	8.88564
6.83122	9.64919
6.84955	10.7686
6.86789	11.2301
6.88623	12.5611
6.90456	13.5785
6.9229	14.8806
6.94124	16.0326
6.95957	17.752
6.97791	19.5503
6.99625	21.5563
7.01459	23.0084
7.03292	25.6299
7.05126	28.3013
7.0696	31.0594
7.08793	34.354
7.10627	37.9563
7.12461	41.926
7.14294	47.5113
7.16128	53.1004
7.17962	60.4551
7.19795	69.5234
7.21629	79.3938
7.23463	92.6895
7.25296	107.234
7.2713	122.497
7.28964	136.185
7.30798	146.911
7.32631	145.407
7.34465	130.698
7.36299	107.657
7.38132	83.2385
7.39966	60.5281
7.418	42.2318
7.43633	30.2246
7.45467	23.4315
7.47301	18.2636
7.49134	14.2036
7.50968	10.4281
7.52802	7.372
7.54636	5.29869
7.56469	4.03316
7.58303	3.38885
7.60137	2.92918
7.6197	2.64069
7.63804	2.46952
7.65638	2.22333
7.67471	2.08293
7.69305	1.98869
7.71139	1.81367
7.72972	1.69443
7.74806	1.47709
7.7664	1.51941
7.78473	1.38862
7.80307	1.44055
7.82141	1.38285
7.83975	1.27515
7.85808	1.22322
7.87642	1.08474
7.89476	1.14436
7.91309	1.18091
7.93143	1.03473
7.94977	1.01935
7.9681	1.08859
7.98644	1.0155
8.00478	0.928953
8.02311	0.982806
8.04145	0.982806
8.05979	0.990499
8.07813	0.855868
8.09646	0.815479
8.1148	0.91549
8.13314	0.827018
8.15147	0.761626
8.16981	0.832788
8.18815	0.815479
8.20648	0.738547
8.22482	0.74624
8.24316	0.744317
8.26149	0.76932
8.27983	0.715467
8.29817	0.782783
8.3165	0.696234
8.33484	0.721237
8.35318	0.702004
8.37152	0.657768
8.38985	0.72316
8.40819	0.680848
8.42653	0.688541
8.44486	0.727007
8.4632	0.659691
8.48154	0.690464
8.49987	0.678924
8.51821	0.611609
8.53655	0.644305
8.55488	0.661615
8.57322	0.648152
8.59156	0.630842
8.6099	0.653922
8.62823	0.621226
8.64657	0.648152
8.66491	0.56545
8.68324	0.573143
8.70158	0.534677
8.71992	0.55391
8.73825	0.613532
8.75659	0.580836
8.77493	0.573143
8.79326	0.592376
8.8116	0.546217
8.82994	0.586606
8.84828	0.5366
8.86661	0.563527
8.88495	0.55968
8.90329	0.563527
8.92162	0.569296
8.93996	0.56545
8.9583	0.56545
8.97663	0.578913
8.99497	0.575066
9.01331	0.605839
9.03164	0.551987
9.04998	0.515444
9.06832	0.538524
9.08665	0.507751
9.10499	0.523137
9.12333	0.56545
9.14167	0.563527
9.16	0.526984
9.17834	0.528907
9.19668	0.515444
9.21501	0.55391
9.23335	0.511597
9.25169	0.557757
9.27002	0.534677
9.28836	0.461592
9.3067	0.550063
9.32503	0.551987
9.34337	0.455822
9.36171	0.561603
9.38005	0.523137
9.39838	0.550063
9.41672	0.496211
9.43506	0.478901
9.45339	0.505828
9.47173	0.507751
9.49007	0.507751
9.5084	0.475055
9.52674	0.465438
9.54508	0.503904
9.56341	0.486595
9.58175	0.475055
9.60009	0.453899
9.61842	0.453899
9.63676	0.498134
9.6551	0.482748
9.67344	0.476978
9.69177	0.478901
9.71011	0.428896
9.72845	0.488518
9.74678	0.444282
9.76512	0.428896
9.78346	0.471208
9.80179	0.473132
9.82013	0.465438
9.83847	0.505828
9.8568	0.509674
9.87514	0.448129
9.89348	0.465438
9.91182	0.453899
9.93015	0.450052
9.94849	0.415433
9.96683	0.421202
9.98516	0.436589
10.0035	0.446205
10.0218	0.513521
10.0402	0.455822
10.0585	0.465438
10.0768	0.421202
10.0952	0.480825
10.1135	0.486595
10.1319	0.461592
10.1502	0.475055
10.1685	0.405816
10.1869	0.409663
10.2052	0.421202
10.2235	0.440435
10.2419	0.498134
10.2602	0.432742
10.2786	0.461592
10.2969	0.436589
10.3152	0.453899
10.3336	0.440435
10.3519	0.457745
10.3702	0.461592
10.3886	0.494288
10.4069	0.400046
10.4252	0.401969
10.4436	0.461592
10.4619	0.476978
10.4803	0.419279
10.4986	0.451975
10.5169	0.421202
10.5353	0.428896
10.5536	0.403893
10.5719	0.448129
10.5903	0.438512
10.6086	0.450052
10.627	0.401969
10.6453	0.446205
10.6636	0.434666
10.682	0.409663
10.7003	0.403893
10.7186	0.363503
10.737	0.425049
10.7553	0.450052
10.7736	0.415433
10.792	0.409663
10.8103	0.3962
10.8287	0.407739
10.847	0.398123
10.8653	0.407739
10.8837	0.421202
10.902	0.432742
10.9203	0.432742
10.9387	0.415433
10.957	0.430819
10.9754	0.417356
10.9937	0.407739
11.012	0.392353
11.0304	0.415433
11.0487	0.426972
11.067	0.386583
11.0854	0.365427
11.1037	0.357734
11.1221	0.411586
11.1404	0.455822
11.1587	0.398123
11.1771	0.400046
11.1954	0.430819
11.2137	0.411586
11.2321	0.432742
11.2504	0.442359
11.2687	0.411586
11.2871	0.39043
11.3054	0.421202
11.3238	0.388506
11.3421	0.446205
11.3604	0.428896
11.3788	0.363503
11.3971	0.394276
11.4154	0.438512
11.4338	0.407739
11.4521	0.398123
11.4705	0.37889
11.4888	0.417356
11.5071	0.36735
11.5255	0.398123
11.5438	0.432742
11.5621	0.37889
11.5805	0.388506
11.5988	0.400046
11.6171	0.363503
11.6355	0.37312
11.6538	0.398123
11.6722	0.382736
11.6905	0.407739
11.7088	0.423126
11.7272	0.369273
11.7455	0.394276
11.7638	0.469285
11.7822	0.376967
11.8005	0.340424
11.8189	0.403893
11.8372	0.35581
11.8555	0.442359
11.8739	0.392353
11.8922	0.442359
11.9105	0.37312
11.9289	0.380813
11.9472	0.365427
11.9655	0.380813
11.9839	0.38466
12.0022	0.37312
12.0206	0.405816
12.0389	0.394276
12.0572	0.430819
12.0756	0.438512
12.0939	0.419279
12.1122	0.415433
12.1306	0.394276
12.1489	0.419279
12.1673	0.451975
12.1856	0.413509
12.2039	0.430819
12.2223	0.409663
12.2406	0.442359
12.2589	0.453899
12.2773	0.486595
12.2956	0.525061
12.3139	0.500058
12.3323	0.501981
12.3506	0.528907
12.369	0.567373
12.3873	0.55968
12.4056	0.623149
12.424	0.648152
12.4423	0.72316
12.4606	0.713544
12.479	0.777013
12.4973	0.980882
12.5157	1.00012
12.534	1.12128
12.5523	1.2386
12.5707	1.31361
12.589	1.56749
12.6073	1.73866
12.6257	2.09063
12.644	2.25988
12.6624	2.36373
12.6807	2.46375
12.699	2.2945
12.7174	1.92522
12.7357	1.62711
12.754	1.10013
12.7724	0.971266
12.7907	0.777013
12.809	0.651998
12.8274	0.619302
12.8457	0.575066
12.8641	0.463515
12.8824	0.532754
12.9007	0.448129
12.9191	0.423126
12.9374	0.376967
12.9557	0.423126
12.9741	0.426972
12.9924	0.401969
13.0108	0.426972
13.0291	0.359657
13.0474	0.425049
13.0658	0.371197
13.0841	0.37889
13.1024	0.394276
13.1208	0.398123
13.1391	0.359657
13.1574	0.382736
13.1758	0.382736
13.1941	0.305805
13.2125	0.36158
13.2308	0.353887
13.2491	0.394276
13.2675	0.392353
13.2858	0.342347
13.3041	0.35581
13.3225	0.371197
13.3408	0.288495
13.3592	0.296188
13.3775	0.34427
13.3958	0.36735
13.4142	0.400046
13.4325	0.353887
13.4508	0.398123
13.4692	0.332731
13.4875	0.407739
13.5058	0.403893
13.5242	0.363503
13.5425	0.317344
13.5609	0.365427
13.5792	0.35581
13.5975	0.394276
13.6159	0.321191
13.6342	0.382736
13.6525	0.3962
13.6709	0.330807
13.6892	0.330807
13.7076	0.37312
13.7259	0.338501
13.7442	0.359657
13.7626	0.334654
13.7809	0.340424
13.7992	0.37312
13.8176	0.267339
13.8359	0.401969
13.8542	0.35004
13.8726	0.319268
13.8909	0.36158
13.9093	0.338501
13.9276	0.403893
13.9459	0.34427
13.9643	0.371197
13.9826	0.338501
14.0009	0.35004
14.0193	0.35004
14.0376	0.328884
14.056	0.328884
14.0743	0.388506
14.0926	0.35004
14.111	0.326961
14.1293	0.369273
14.1476	0.36158
14.166	0.365427
14.1843	0.375043
14.2026	0.39043
14.221	0.386583
14.2393	0.415433
14.2577	0.411586
14.276	0.346194
14.2943	0.376967
14.3127	0.375043
14.331	0.36158
14.3493	0.34427
14.3677	0.398123
14.386	0.419279
14.4044	0.444282
14.4227	0.380813
14.441	0.392353
14.4594	0.430819
14.4777	0.3962
14.496	0.36735
14.5144	0.382736
14.5327	0.382736
14.5511	0.438512
14.5694	0.3962
14.5877	0.442359
14.6061	0.438512
14.6244	0.440435
14.6427	0.436589
14.6611	0.438512
14.6794	0.453899
14.6977	0.451975
14.7161	0.353887
14.7344	0.382736
14.7528	0.400046
14.7711	0.35004
14.7894	0.382736
14.8078	0.319268
14.8261	0.35581
14.8444	0.388506
14.8628	0.323114
14.8811	0.36735
14.8995	0.36158
14.9178	0.334654
14.9361	0.328884
14.9545	0.375043
14.9728	0.3962
14.9911	0.348117
15.0095	0.357734
15.0278	0.371197
15.0461	0.323114
15.0645	0.346194
15.0828	0.319268
15.1012	0.317344
15.1195	0.348117
15.1378	0.36158
15.1562	0.351964
15.1745	0.317344
15.1928	0.338501
15.2112	0.286572
15.2295	0.386583
15.2479	0.380813
15.2662	0.307728
15.2845	0.375043
15.3029	0.332731
15.3212	0.346194
15.3395	0.394276
15.3579	0.35004
15.3762	0.357734
15.3945	0.36735
15.4129	0.369273
15.4312	0.37312
15.4496	0.346194
15.4679	0.340424
15.4862	0.286572
15.5046	0.382736
15.5229	0.36158
15.5412	0.409663
15.5596	0.39043
15.5779	0.375043
15.5963	0.375043
15.6146	0.417356
15.6329	0.398123
15.6513	0.451975
15.6696	0.473132
15.6879	0.455822
15.7063	0.467362
15.7246	0.492365
15.7429	0.494288
15.7613	0.500058
15.7796	0.509674
15.798	0.632765
15.8163	0.594299
15.8346	0.626995
15.853	0.719314
15.8713	0.678924
15.8896	0.659691
15.908	0.650075
15.9263	0.667385
15.9447	0.709697
15.963	0.538524
15.9813	0.673155
15.9997	0.590453
16.018	0.534677
16.0363	0.507751
16.0547	0.505828
16.073	0.438512
16.0914	0.463515
16.1097	0.473132
16.128	0.415433
16.1464	0.405816
16.1647	0.346194
16.183	0.394276
16.2014	0.421202
16.2197	0.37312
16.238	0.365427
16.2564	0.450052
16.2747	0.346194
16.2931	0.35004
16.3114	0.413509
16.3297	0.359657
16.3481	0.353887
16.3664	0.332731
16.3847	0.311574
16.4031	0.330807
16.4214	0.351964
16.4398	0.328884
16.4581	0.323114
16.4764	0.407739
16.4948	0.334654
16.5131	0.36158
16.5314	0.301958
16.5498	0.34427
16.5681	0.353887
16.5864	0.407739
16.6048	0.359657
16.6231	0.37889
16.6415	0.359657
16.6598	0.317344
16.6781	0.403893
16.6965	0.328884
16.7148	0.34427
16.7331	0.359657
16.7515	0.35581
16.7698	0.37889
16.7882	0.342347
16.8065	0.394276
16.8248	0.346194
16.8432	0.311574
16.8615	0.313498
16.8798	0.317344
16.8982	0.382736
16.9165	0.332731
16.9348	0.421202
16.9532	0.380813
16.9715	0.338501
16.9899	0.359657
17.0082	0.375043
17.0265	0.376967
17.0449	0.39043
17.0632	0.398123
17.0815	0.37889
17.0999	0.36735
17.1182	0.36735
17.1366	0.382736
17.1549	0.411586
17.1732	0.436589
17.1916	0.353887
17.2099	0.453899
17.2282	0.419279
17.2466	0.400046
17.2649	0.444282
17.2832	0.446205
17.3016	0.398123
17.3199	0.515444
17.3383	0.484671
17.3566	0.457745
17.3749	0.501981
17.3933	0.534677
17.4116	0.596223
17.4299	0.567373
17.4483	0.57122
17.4666	0.644305
17.485	0.736623
17.5033	0.636612
17.5216	0.669308
17.54	0.667385
17.5583	0.686618
17.5766	0.598146
17.595	0.580836
17.6133	0.601993
17.6316	0.578913
17.65	0.505828
17.6683	0.601993
17.6867	0.509674
17.705	0.446205
17.7233	0.509674
17.7417	0.478901
17.76	0.436589
17.7783	0.436589
17.7967	0.446205
17.815	0.432742
17.8334	0.415433
17.8517	0.426972
17.87	0.448129
17.8884	0.413509
17.9067	0.455822
17.925	0.461592
17.9434	0.519291
17.9617	0.538524
17.9801	0.509674
17.9984	0.455822
18.0167	0.480825
18.0351	0.430819
18.0534	0.515444
18.0717	0.455822
18.0901	0.469285
18.1084	0.519291
18.1267	0.444282
18.1451	0.476978
18.1634	0.401969
18.1818	0.413509
18.2001	0.411586
18.2184	0.463515
18.2368	0.476978
18.2551	0.448129
18.2734	0.376967
18.2918	0.386583
18.3101	0.419279
18.3285	0.37889
18.3468	0.440435
18.3651	0.430819
18.3835	0.450052
18.4018	0.39043
18.4201	0.423126
18.4385	0.476978
18.4568	0.475055
18.4751	0.453899
18.4935	0.467362
18.5118	0.423126
18.5302	0.467362
18.5485	0.425049
18.5668	0.419279
18.5852	0.465438
18.6035	0.392353
18.6218	0.426972
18.6402	0.467362
18.6585	0.473132
18.6769	0.482748
18.6952	0.473132
18.7135	0.503904
18.7319	0.428896
18.7502	0.419279
18.7685	0.465438
18.7869	0.448129
18.8052	0.457745
18.8235	0.55391
18.8419	0.525061
18.8602	0.463515
18.8786	0.544294
18.8969	0.500058
18.9152	0.575066
18.9336	0.626995
18.9519	0.575066
18.9702	0.615456
18.9886	0.619302
19.0069	0.648152
19.0253	0.684694
19.0436	0.621226
19.0619	0.725084
19.0803	0.823172
19.0986	0.875101
19.1169	0.94434
19.1353	0.953956
19.1536	1.09051
19.1719	1.20975
19.1903	1.32323
19.2086	1.48671
19.227	1.67904
19.2453	1.87329
19.2636	2.22526
19.282	2.71377
19.3003	3.15036
19.3186	3.94276
19.337	4.5236
19.3553	5.39293
19.3737	6.41228
19.392	6.92965
19.4103	7.68743
19.4287	7.40085
19.447	6.83733
19.4653	5.91607
19.4837	5.09674
19.502	4.0697
19.5204	3.15998
19.5387	2.4599
19.557	2.15217
19.5754	1.79636
19.5937	1.40593
19.612	1.31361
19.6304	1.22514
19.6487	1.11936
19.667	1.01166
19.6854	0.919337
19.7037	0.905874
19.7221	0.780859
19.7404	0.703927
19.7587	0.725084
19.7771	0.661615
19.7954	0.621226
19.8137	0.598146
19.8321	0.569296
19.8504	0.584683
19.8688	0.646228
19.8871	0.555833
19.9054	0.532754
19.9238	0.551987
19.9421	0.551987
19.9604	0.498134
19.9788	0.578913
19.9971	0.561603
20.0154	0.525061
20.0338	0.455822
20.0521	0.551987
20.0705	0.500058
20.0888	0.523137
20.1071	0.511597
20.1255	0.448129
20.1438	0.461592
20.1621	0.513521
20.1805	0.511597
20.1988	0.475055
20.2172	0.461592
20.2355	0.480825
20.2538	0.430819
20.2722	0.486595
20.2905	0.500058
20.3088	0.494288
20.3272	0.440435
20.3455	0.459668
20.3638	0.540447
20.3822	0.53083
20.4005	0.578913
20.4189	0.555833
20.4372	0.601993
20.4555	0.540447
20.4739	0.480825
20.4922	0.448129
20.5105	0.544294
20.5289	0.505828
20.5472	0.528907
20.5656	0.532754
20.5839	0.505828
20.6022	0.526984
20.6206	0.532754
20.6389	0.54814
20.6572	0.550063
20.6756	0.619302
20.6939	0.590453
20.7122	0.588529
20.7306	0.555833
20.7489	0.615456
20.7673	0.584683
20.7856	0.58276
20.8039	0.632765
20.8223	0.644305
20.8406	0.596223
20.8589	0.58276
20.8773	0.626995
20.8956	0.596223
20.914	0.584683
20.9323	0.596223
20.9506	0.607762
20.969	0.573143
20.9873	0.58276
21.0056	0.588529
21.024	0.521214
21.0423	0.586606
21.0607	0.561603
21.079	0.57699
21.0973	0.580836
21.1157	0.525061
21.134	0.58276
21.1523	0.605839
21.1707	0.55968
21.189	0.544294
21.2073	0.688541
21.2257	0.578913
21.244	0.58276
21.2624	0.632765
21.2807	0.590453
21.299	0.640459
21.3174	0.646228
21.3357	0.677001
21.354	0.765473
21.3724	0.730854
21.3907	0.796246
21.4091	0.902027
21.4274	0.802016
21.4457	0.92126
21.4641	1.11744
21.4824	1.09628
21.5007	1.23476
21.5191	1.40208
21.5374	1.46363
21.5557	1.73674
21.5741	1.90599
21.5924	2.02331
21.6108	2.35027
21.6291	2.3772
21.6474	2.62915
21.6658	2.80417
21.6841	2.81956
21.7024	2.83687
21.7208	2.61184
21.7391	2.47336
21.7575	2.25026
21.7758	1.99446
21.7941	1.79828
21.8125	1.62326
21.8308	1.46748
21.8491	1.35593
21.8675	1.31554
21.8858	1.17129
21.9041	1.13859
21.9225	1.22514
21.9408	1.16552
21.9592	1.16552
21.9775	1.31554
21.9958	1.25399
22.0142	1.35785
22.0325	1.34823
22.0508	1.40208
22.0692	1.32515
22.0875	1.22322
22.1059	1.15975
22.1242	1.13859
22.1425	1.03473
22.1609	0.975113
22.1792	0.877024
22.1975	0.9328
22.2159	0.90972
22.2342	0.873178
22.2525	0.836635
22.2709	0.788553
22.2892	0.777013
22.3076	0.828942
22.3259	0.771243
22.3442	0.686618
22.3626	0.632765
22.3809	0.634689
22.3992	0.58276
22.4176	0.611609
22.4359	0.586606
22.4543	0.594299
22.4726	0.496211
22.4909	0.511597
22.5093	0.467362
22.5276	0.519291
22.5459	0.528907
22.5643	0.488518
22.5826	0.490441
22.6009	0.501981
22.6193	0.513521
22.6376	0.461592
22.656	0.538524
22.6743	0.476978
22.6926	0.446205
22.711	0.465438
22.7293	0.473132
22.7476	0.490441
22.766	0.471208
22.7843	0.453899
22.8027	0.509674
22.821	0.446205
22.8393	0.457745
22.8577	0.461592
22.876	0.448129
22.8943	0.430819
22.9127	0.444282
22.931	0.446205
22.9494	0.434666
22.9677	0.459668
22.986	0.451975
23.0044	0.417356
23.0227	0.482748
23.041	0.448129
23.0594	0.459668
23.0777	0.509674
23.096	0.501981
23.1144	0.459668
23.1327	0.450052
23.1511	0.471208
23.1694	0.480825
23.1877	0.538524
23.2061	0.494288
23.2244	0.525061
23.2427	0.450052
23.2611	0.534677
23.2794	0.54237
23.2978	0.521214
23.3161	0.511597
23.3344	0.482748
23.3528	0.517367
23.3711	0.465438
23.3894	0.507751
23.4078	0.471208
23.4261	0.498134
23.4444	0.488518
23.4628	0.446205
23.4811	0.451975
23.4995	0.423126
23.5178	0.492365
23.5361	0.438512
23.5545	0.450052
23.5728	0.403893
23.5911	0.409663
23.6095	0.509674
23.6278	0.428896
23.6462	0.444282
23.6645	0.446205
23.6828	0.394276
23.7012	0.488518
23.7195	0.457745
23.7378	0.473132
23.7562	0.459668
23.7745	0.513521
23.7928	0.563527
23.8112	0.551987
23.8295	0.476978
23.8479	0.557757
23.8662	0.569296
23.8845	0.546217
23.9029	0.650075
23.9212	0.630842
23.9395	0.607762
23.9579	0.736623
23.9762	0.800092
23.9946	0.842405
24.0129	0.952033
24.0312	0.967419
24.0496	0.996269
24.0679	1.07512
24.0862	1.0155
24.1046	1.00396
24.1229	0.952033
24.1412	0.93857
24.1596	0.884717
24.1779	0.800092
24.1963	0.817402
24.2146	0.71739
24.2329	0.690464
24.2513	0.725084
24.2696	0.74047
24.2879	0.617379
24.3063	0.586606
24.3246	0.57122
24.343	0.567373
24.3613	0.551987
24.3796	0.55391
24.398	0.601993
24.4163	0.538524
24.4346	0.55968
24.453	0.598146
24.4713	0.588529
24.4897	0.569296
24.508	0.5366
24.5263	0.56545
24.5447	0.628919
24.563	0.54814
24.5813	0.605839
24.5997	0.569296
24.618	0.534677
24.6363	0.601993
24.6547	0.54237
24.673	0.469285
24.6914	0.526984
24.7097	0.498134
24.728	0.417356
24.7464	0.386583
24.7647	0.405816
24.783	0.444282
24.8014	0.415433
24.8197	0.388506
24.8381	0.400046
24.8564	0.39043
24.8747	0.434666
24.8931	0.409663
24.9114	0.434666
24.9297	0.357734
24.9481	0.394276
24.9664	0.398123
24.9847	0.432742
25.0031	0.444282
25.0214	0.346194
25.0398	0.348117
25.0581	0.35581
25.0764	0.325038
25.0948	0.36735
25.1131	0.351964
25.1314	0.348117
25.1498	0.353887
25.1681	0.365427
25.1865	0.36158
25.2048	0.334654
25.2231	0.365427
25.2415	0.326961
25.2598	0.409663
25.2781	0.382736
25.2965	0.371197
25.3148	0.430819
25.3331	0.382736
25.3515	0.36735
25.3698	0.403893
25.3882	0.407739
25.4065	0.415433
25.4248	0.426972
25.4432	0.425049
25.4615	0.438512
25.4798	0.442359
25.4982	0.461592
25.5165	0.482748
25.5349	0.430819
25.5532	0.505828
25.5715	0.507751
25.5899	0.438512
25.6082	0.55391
25.6265	0.451975
25.6449	0.509674
25.6632	0.467362
25.6815	0.484671
25.6999	0.436589
25.7182	0.426972
25.7366	0.365427
25.7549	0.36158
25.7732	0.388506
25.7916	0.363503
25.8099	0.436589
25.8282	0.388506
25.8466	0.35004
25.8649	0.455822
25.8833	0.409663
25.9016	0.423126
25.9199	0.369273
25.9383	0.359657
25.9566	0.34427
25.9749	0.328884
25.9933	0.36735
26.0116	0.365427
26.0299	0.365427
26.0483	0.365427
26.0666	0.36735
26.085	0.296188
26.1033	0.328884
26.1216	0.386583
26.14	0.36158
26.1583	0.301958
26.1766	0.37312
26.195	0.323114
26.2133	0.363503
26.2317	0.342347
26.25	0.388506
26.2683	0.351964
26.2867	0.301958
26.305	0.388506
26.3233	0.321191
26.3417	0.351964
26.36	0.332731
26.3784	0.307728
26.3967	0.359657
26.415	0.348117
26.4334	0.39043
26.4517	0.423126
26.47	0.403893
26.4884	0.398123
26.5067	0.473132
26.525	0.490441
26.5434	0.496211
26.5617	0.501981
26.5801	0.5366
26.5984	0.54237
26.6167	0.492365
26.6351	0.482748
26.6534	0.480825
26.6717	0.5366
26.6901	0.480825
26.7084	0.486595
26.7268	0.490441
26.7451	0.430819
26.7634	0.421202
26.7818	0.494288
26.8001	0.459668
26.8184	0.440435
26.8368	0.473132
26.8551	0.515444
26.8734	0.457745
26.8918	0.438512
26.9101	0.428896
26.9285	0.438512
26.9468	0.432742
26.9651	0.413509
26.9835	0.451975
27.0018	0.392353
27.0201	0.486595
27.0385	0.434666
27.0568	0.503904
27.0752	0.555833
27.0935	0.54237
27.1118	0.54237
27.1302	0.528907
27.1485	0.57122
27.1668	0.702004
27.1852	0.680848
27.2035	0.767396
27.2218	0.846251
27.2402	0.934723
27.2585	0.952033
27.2769	0.984729
27.2952	0.953956
27.3135	0.925107
27.3319	0.957803
27.3502	0.9328
27.3685	0.857791
27.3869	0.92703
27.4052	0.867408
27.4236	0.694311
27.4419	0.646228
27.4602	0.686618
27.4786	0.648152
27.4969	0.630842
27.5152	0.515444
27.5336	0.56545
27.5519	0.444282
27.5702	0.501981
27.5886	0.538524
27.6069	0.469285
27.6253	0.455822
27.6436	0.415433
27.6619	0.440435
27.6803	0.461592
27.6986	0.500058
27.7169	0.3962
27.7353	0.413509
27.7536	0.411586
27.772	0.38466
27.7903	0.39043
27.8086	0.417356
27.827	0.417356
27.8453	0.348117
27.8636	0.388506
27.882	0.432742
27.9003	0.38466
27.9187	0.369273
27.937	0.388506
27.9553	0.376967
27.9737	0.419279
27.992	0.419279
28.0103	0.392353
28.0287	0.434666
28.047	0.428896
28.0653	0.444282
28.0837	0.503904
28.102	0.517367
28.1204	0.546217
28.1387	0.605839
28.157	0.653922
28.1754	0.675078
28.1937	0.707774
28.212	0.761626
28.2304	0.838558
28.2487	0.975113
28.2671	0.971266
28.2854	0.996269
28.3037	1.01166
28.3221	1.05012
28.3404	0.952033
28.3587	0.91549
28.3771	0.877024
28.3954	0.725084
28.4137	0.703927
28.4321	0.638535
28.4504	0.621226
28.4688	0.550063
28.4871	0.517367
28.5054	0.538524
28.5238	0.432742
28.5421	0.421202
28.5604	0.401969
28.5788	0.480825
28.5971	0.428896
28.6155	0.357734
28.6338	0.371197
28.6521	0.411586
28.6705	0.376967
28.6888	0.407739
28.7071	0.407739
28.7255	0.371197
28.7438	0.38466
28.7621	0.394276
28.7805	0.357734
28.7988	0.351964
28.8172	0.298111
28.8355	0.336577
28.8538	0.305805
28.8722	0.348117
28.8905	0.294265
28.9088	0.326961
28.9272	0.300035
28.9455	0.303881
28.9639	0.296188
28.9822	0.296188
29.0005	0.311574
29.0189	0.311574
29.0372	0.267339
29.0555	0.255799
29.0739	0.273108
29.0922	0.263492
29.1105	0.251952
29.1289	0.290418
29.1472	0.300035
29.1656	0.284648
29.1839	0.259645
29.2022	0.280802
29.2206	0.275032
29.2389	0.290418
29.2572	0.269262
29.2756	0.255799
29.2939	0.300035
29.3123	0.323114
29.3306	0.317344
29.3489	0.332731
29.3673	0.294265
29.3856	0.323114
29.4039	0.303881
29.4223	0.342347
29.4406	0.346194
29.459	0.328884
29.4773	0.288495
29.4956	0.315421
29.514	0.303881
29.5323	0.319268
29.5506	0.336577
29.569	0.276955
29.5873	0.359657
29.6056	0.292341
29.624	0.330807
29.6423	0.311574
29.6607	0.321191
29.679	0.301958
29.6973	0.34427
29.7157	0.311574
29.734	0.269262
29.7523	0.300035
29.7707	0.282725
29.789	0.259645
29.8074	0.317344
29.8257	0.267339
29.844	0.276955
29.8624	0.292341
29.8807	0.267339
29.899	0.238489
29.9174	0.298111
29.9357	0.232719
29.954	0.246182
29.9724	0.248106
29.9907	0.257722
30.0091	0.323114
30.0274	0.255799
30.0457	0.246182
30.0641	0.242336
30.0824	0.215409
30.1007	0.240412
30.1191	0.225026
30.1374	0.265415
30.1558	0.223103
30.1741	0.219256
30.1924	0.292341
30.2108	0.255799
30.2291	0.275032
30.2474	0.226949
30.2658	0.232719
30.2841	0.213486
30.3024	0.18079
30.3208	0.265415
30.3391	0.250029
30.3575	0.232719
30.3758	0.251952
30.3941	0.236566
30.4125	0.221179
30.4308	0.253875
30.4491	0.242336
30.4675	0.265415
30.4858	0.259645
30.5042	0.221179
30.5225	0.288495
30.5408	0.259645
30.5592	0.261569
30.5775	0.240412
30.5958	0.240412
30.6142	0.244259
30.6325	0.323114
30.6508	0.275032
30.6692	0.300035
30.6875	0.278878
30.7059	0.280802
30.7242	0.309651
30.7425	0.278878
30.7609	0.282725
30.7792	0.271185
30.7975	0.259645
30.8159	0.253875
30.8342	0.280802
30.8526	0.250029
30.8709	0.259645
30.8892	0.257722
30.9076	0.271185
30.9259	0.275032
30.9442	0.251952
30.9626	0.282725
30.9809	0.294265
30.9992	0.294265
31.0176	0.348117
31.0359	0.365427
31.0543	0.330807
31.0726	0.363503
31.0909	0.35004
31.1093	0.423126
31.1276	0.376967
31.1459	0.37889
31.1643	0.34427
31.1826	0.36735
31.201	0.371197
31.2193	0.328884
31.2376	0.332731
31.256	0.328884
31.2743	0.298111
31.2926	0.330807
31.311	0.348117
31.3293	0.321191
31.3477	0.351964
31.366	0.332731
31.3843	0.307728
31.4027	0.37889
31.421	0.311574
31.4393	0.300035
31.4577	0.348117
31.476	0.325038
31.4943	0.330807
31.5127	0.3962
31.531	0.326961
31.5494	0.271185
31.5677	0.271185
31.586	0.284648
31.6044	0.305805
31.6227	0.261569
31.641	0.248106
31.6594	0.250029
31.6777	0.250029
31.6961	0.196176
31.7144	0.234642
31.7327	0.215409
31.7511	0.238489
31.7694	0.225026
31.7877	0.219256
31.8061	0.236566
31.8244	0.200023
31.8427	0.228873
31.8611	0.226949
31.8794	0.251952
31.8978	0.230796
31.9161	0.18656
31.9344	0.1981
31.9528	0.225026
31.9711	0.20964
31.9894	0.253875
32.0078	0.261569
32.0261	0.261569
32.0445	0.286572
32.0628	0.236566
32.0811	0.284648
32.0995	0.213486
32.1178	0.242336
32.1361	0.240412
32.1545	0.242336
32.1728	0.221179
32.1911	0.248106
32.2095	0.271185
32.2278	0.253875
32.2462	0.271185
32.2645	0.282725
32.2828	0.271185
32.3012	0.286572
32.3195	0.298111
32.3378	0.290418
32.3562	0.325038
32.3745	0.240412
32.3929	0.265415
32.4112	0.305805
32.4295	0.301958
32.4479	0.269262
32.4662	0.276955
32.4845	0.253875
32.5029	0.236566
32.5212	0.275032
32.5395	0.217333
32.5579	0.275032
32.5762	0.232719
32.5946	0.200023
32.6129	0.253875
32.6312	0.253875
32.6496	0.248106
32.6679	0.276955
32.6862	0.219256
32.7046	0.246182
32.7229	0.240412
32.7413	0.226949
32.7596	0.240412
32.7779	0.265415
32.7963	0.271185
32.8146	0.276955
32.8329	0.265415
32.8513	0.248106
32.8696	0.271185
32.888	0.242336
32.9063	0.253875
32.9246	0.223103
32.943	0.298111
32.9613	0.265415
32.9796	0.238489
32.998	0.230796
33.0163	0.275032
33.0346	0.207716
33.053	0.257722
33.0713	0.267339
33.0897	0.251952
33.108	0.267339
33.1263	0.263492
33.1447	0.236566
33.163	0.196176
33.1813	0.20964
33.1997	0.240412
33.218	0.207716
33.2364	0.248106
33.2547	0.232719
33.273	0.263492
33.2914	0.221179
33.3097	0.211563
33.328	0.251952
33.3464	0.240412
33.3647	0.238489
33.383	0.286572
33.4014	0.253875
33.4197	0.278878
33.4381	0.286572
33.4564	0.240412
33.4747	0.319268
33.4931	0.259645
33.5114	0.313498
33.5297	0.351964
33.5481	0.357734
33.5664	0.365427
33.5848	0.386583
33.6031	0.440435
33.6214	0.461592
33.6398	0.486595
33.6581	0.507751
33.6764	0.525061
33.6948	0.563527
33.7131	0.550063
33.7314	0.58276
33.7498	0.513521
33.7681	0.630842
33.7865	0.5366
33.8048	0.513521
33.8231	0.432742
33.8415	0.465438
33.8598	0.407739
33.8781	0.340424
33.8965	0.39043
33.9148	0.36735
33.9332	0.325038
33.9515	0.328884
33.9698	0.303881
33.9882	0.290418
34.0065	0.248106
34.0248	0.273108
34.0432	0.278878
34.0615	0.250029
34.0798	0.234642
34.0982	0.250029
34.1165	0.263492
34.1349	0.269262
34.1532	0.253875
34.1715	0.282725
34.1899	0.250029
34.2082	0.278878
34.2265	0.221179
34.2449	0.211563
34.2632	0.228873
34.2816	0.242336
34.2999	0.230796
34.3182	0.196176
34.3366	0.244259
34.3549	0.234642
34.3732	0.20964
34.3916	0.196176
34.4099	0.226949
34.4282	0.19233
34.4466	0.240412
34.4649	0.242336
34.4833	0.184637
34.5016	0.223103
34.5199	0.226949
34.5383	0.251952
34.5566	0.228873
34.5749	0.19233
34.5933	0.201946
34.6116	0.20387
34.63	0.217333
34.6483	0.226949
34.6666	0.219256
34.685	0.17502
34.7033	0.251952
34.7216	0.236566
34.74	0.232719
34.7583	0.20387
34.7767	0.211563
34.795	0.246182
34.8133	0.211563
34.8317	0.20387
34.85	0.213486
34.8683	0.20387
34.8867	0.20964
34.905	0.1981
34.9233	0.257722
34.9417	0.190407
34.96	0.20387
34.9784	0.217333
34.9967	0.240412
35.015	0.248106
35.0334	0.205793
35.0517	0.242336
35.07	0.205793
35.0884	0.246182
35.1067	0.269262
35.1251	0.259645
35.1434	0.265415
35.1617	0.242336
35.1801	0.288495
35.1984	0.246182
35.2167	0.294265
35.2351	0.259645
35.2534	0.321191
35.2717	0.321191
35.2901	0.323114
35.3084	0.35581
35.3268	0.39043
35.3451	0.392353
35.3634	0.432742
35.3818	0.3962
35.4001	0.36158
35.4184	0.37312
35.4368	0.328884
35.4551	0.365427
35.4735	0.323114
35.4918	0.35004
35.5101	0.319268
35.5285	0.330807
35.5468	0.300035
35.5651	0.317344
35.5835	0.263492
35.6018	0.276955
35.6201	0.284648
35.6385	0.261569
35.6568	0.263492
35.6752	0.263492
35.6935	0.205793
35.7118	0.244259
35.7302	0.219256
35.7485	0.246182
35.7668	0.238489
35.7852	0.20387
35.8035	0.225026
35.8219	0.234642
35.8402	0.278878
35.8585	0.230796
35.8769	0.225026
35.8952	0.228873
35.9135	0.228873
35.9319	0.225026
35.9502	0.230796
35.9685	0.225026
35.9869	0.182713
36.0052	0.217333
36.0236	0.228873
36.0419	0.173097
36.0602	0.194253
36.0786	0.234642
36.0969	0.207716
36.1152	0.205793
36.1336	0.18656
36.1519	0.1981
36.1703	0.219256
36.1886	0.200023
36.2069	0.20387
36.2253	0.219256
36.2436	0.215409
36.2619	0.20964
36.2803	0.205793
36.2986	0.232719
36.317	0.1981
36.3353	0.200023
36.3536	0.248106
36.372	0.207716
36.3903	0.225026
36.4086	0.194253
36.427	0.196176
36.4453	0.234642
36.4636	0.228873
36.482	0.228873
36.5003	0.248106
36.5187	0.263492
36.537	0.20964
36.5553	0.244259
36.5737	0.221179
36.592	0.234642
36.6103	0.190407
36.6287	0.205793
36.647	0.230796
36.6654	0.253875
36.6837	0.20387
36.702	0.19233
36.7204	0.242336
36.7387	0.213486
36.757	0.228873
36.7754	0.16925
36.7937	0.20387
36.812	0.196176
36.8304	0.190407
36.8487	0.190407
36.8671	0.201946
36.8854	0.200023
36.9037	0.157711
36.9221	0.221179
36.9404	0.1981
36.9587	0.205793
36.9771	0.188483
36.9954	0.17502
37.0138	0.20387
37.0321	0.19233
37.0504	0.205793
37.0688	0.165404
37.0871	0.1981
37.1054	0.178867
37.1238	0.236566
37.1421	0.211563
37.1604	0.182713
37.1788	0.20387
37.1971	0.234642
37.2155	0.20964
37.2338	0.190407
37.2521	0.20387
37.2705	0.20964
37.2888	0.18079
37.3071	0.146171
37.3255	0.20387
37.3438	0.188483
37.3622	0.171174
37.3805	0.194253
37.3988	0.211563
37.4172	0.1981
37.4355	0.188483
37.4538	0.16348
37.4722	0.165404
37.4905	0.196176
37.5088	0.205793
37.5272	0.19233
37.5455	0.155787
37.5639	0.20964
37.5822	0.167327
37.6005	0.200023
37.6189	0.173097
37.6372	0.18656
37.6555	0.230796
37.6739	0.20387
37.6922	0.207716
37.7106	0.207716
37.7289	0.167327
37.7472	0.176943
37.7656	0.221179
37.7839	0.1981
37.8022	0.225026
37.8206	0.19233
37.8389	0.200023
37.8573	0.165404
37.8756	0.182713
37.8939	0.178867
37.9123	0.201946
37.9306	0.223103
37.9489	0.184637
37.9673	0.207716
37.9856	0.211563
38.0039	0.226949
38.0223	0.194253
38.0406	0.201946
38.059	0.17502
38.0773	0.228873
38.0956	0.188483
38.114	0.182713
38.1323	0.19233
38.1506	0.200023
38.169	0.1981
38.1873	0.188483
38.2057	0.211563
38.224	0.18656
38.2423	0.196176
38.2607	0.221179
38.279	0.1981
38.2973	0.178867
38.3157	0.184637
38.334	0.207716
38.3523	0.228873
38.3707	0.18079
38.389	0.217333
38.4074	0.20964
38.4257	0.194253
38.444	0.194253
38.4624	0.240412
38.4807	0.230796
38.499	0.259645
38.5174	0.223103
38.5357	0.225026
38.5541	0.232719
38.5724	0.234642
38.5907	0.250029
38.6091	0.211563
38.6274	0.276955
38.6457	0.236566
38.6641	0.242336
38.6824	0.211563
38.7007	0.219256
38.7191	0.242336
38.7374	0.217333
38.7558	0.250029
38.7741	0.240412
38.7924	0.226949
38.8108	0.250029
38.8291	0.246182
38.8474	0.221179
38.8658	0.223103
38.8841	0.217333
38.9025	0.20964
38.9208	0.215409
38.9391	0.215409
38.9575	0.201946
38.9758	0.196176
38.9941	0.219256
39.0125	0.215409
39.0308	0.201946
39.0491	0.20387
39.0675	0.18656
39.0858	0.225026
39.1042	0.236566
39.1225	0.238489
39.1408	0.219256
39.1592	0.201946
39.1775	0.20387
39.1958	0.217333
39.2142	0.215409
39.2325	0.219256
39.2509	0.230796
39.2692	0.257722
39.2875	0.251952
39.3059	0.228873
39.3242	0.276955
39.3425	0.290418
39.3609	0.305805
39.3792	0.267339
39.3975	0.342347
39.4159	0.276955
39.4342	0.301958
39.4526	0.351964
39.4709	0.301958
39.4892	0.321191
39.5076	0.278878
39.5259	0.292341
39.5442	0.290418
39.5626	0.236566
39.5809	0.242336
39.5993	0.276955
39.6176	0.255799
39.6359	0.248106
39.6543	0.219256
39.6726	0.217333
39.6909	0.244259
39.7093	0.223103
39.7276	0.242336
39.746	0.190407
39.7643	0.244259
39.7826	0.257722
39.801	0.223103
39.8193	0.217333
39.8376	0.217333
39.856	0.188483
39.8743	0.240412
39.8926	0.234642
39.911	0.250029
39.9293	0.196176
39.9477	0.255799
39.966	0.211563
39.9843	0.221179
40.0027	0.225026
40.021	0.226949
40.0393	0.226949
40.0577	0.205793
40.076	0.280802
40.0944	0.251952
40.1127	0.236566
40.131	0.238489
40.1494	0.228873
40.1677	0.20964
40.186	0.1981
40.2044	0.205793
40.2227	0.261569
40.241	0.188483
40.2594	0.221179
40.2777	0.190407
40.2961	0.205793
40.3144	0.230796
40.3327	0.238489
40.3511	0.205793
40.3694	0.226949
40.3877	0.246182
40.4061	0.228873
40.4244	0.244259
40.4428	0.20964
40.4611	0.234642
40.4794	0.228873
40.4978	0.263492
40.5161	0.257722
40.5344	0.278878
[truncated: 1,056 more rows]

## Sheet: Cooling 155 °C
2theta	Intensity
3.89731	1.53287
3.91565	1.43863
3.93399	1.44632
3.95232	1.39439
3.97066	1.4944
3.989	1.48479
4.00733	1.36362
4.02567	1.41747
4.04401	1.32708
4.06234	1.32515
4.08068	1.51171
4.09902	1.37516
4.11735	1.41362
4.13569	1.42709
4.15403	1.39631
4.17237	1.30784
4.1907	1.33669
4.20904	1.42132
4.22738	1.304
4.24571	1.44055
4.26405	1.30784
4.28239	1.329
4.30072	1.26745
4.31906	1.31746
4.3374	1.34054
4.35573	1.30592
4.37407	1.38093
4.39241	1.23668
4.41075	1.28284
4.42908	1.35016
4.44742	1.18091
4.46576	1.2963
4.48409	1.37131
4.50243	1.34631
4.52077	1.18091
4.5391	1.27899
4.55744	1.2713
4.57578	1.20399
4.59411	1.23668
4.61245	1.26553
4.63079	1.23668
4.64913	1.20014
4.66746	1.22706
4.6858	1.27899
4.70414	1.20783
4.72247	1.19245
4.74081	1.26553
4.75915	1.22514
4.77748	1.19629
4.79582	1.1886
4.81416	1.26745
4.83249	1.1886
4.85083	1.19052
4.86917	1.25207
4.8875	1.15398
4.90584	1.17706
4.92418	1.26168
4.94252	1.18475
4.96085	1.11936
4.97919	1.1636
4.99753	1.17129
5.01586	1.22514
5.0342	1.20591
5.05254	1.10397
5.07087	1.22322
5.08921	1.16937
5.10755	1.11551
5.12588	1.11359
5.14422	1.17129
5.16256	1.18283
5.1809	1.19822
5.19923	1.12513
5.21757	1.15398
5.23591	1.19437
5.25424	1.09628
5.27258	1.11744
5.29092	1.12898
5.30925	1.21745
5.32759	1.25207
5.34593	1.10974
5.36426	1.01166
5.3826	1.12513
5.40094	1.11551
5.41927	1.11744
5.43761	1.15206
5.45595	1.10397
5.47429	1.16167
5.49262	1.20591
5.51096	1.0982
5.5293	1.15783
5.54763	1.10013
5.56597	1.09436
5.58431	1.09243
5.60264	1.1559
5.62098	1.18668
5.63932	1.10974
5.65765	1.18668
5.67599	1.22706
5.69433	1.19245
5.71267	1.15398
5.731	1.1059
5.74934	1.17514
5.76768	1.19245
5.78601	1.14629
5.80435	1.17129
5.82269	1.20975
5.84102	1.17706
5.85936	1.24245
5.8777	1.17706
5.89603	1.20399
5.91437	1.31361
5.93271	1.27515
5.95104	1.24437
5.96938	1.33092
5.98772	1.3867
6.00606	1.36362
6.02439	1.40785
6.04273	1.354
6.06107	1.46363
6.0794	1.38478
6.09774	1.4444
6.11608	1.46363
6.13441	1.62326
6.15275	1.6425
6.17109	1.56364
6.18942	1.68096
6.20776	1.67135
6.2261	1.77905
6.24444	1.82713
6.26277	1.81944
6.28111	1.90791
6.29945	1.97715
6.31778	1.9483
6.33612	2.06562
6.35446	2.0887
6.37279	2.26372
6.39113	2.33873
6.40947	2.38874
6.4278	2.4599
6.44614	2.53875
6.46448	2.68685
6.48282	2.87726
6.50115	3.18691
6.51949	3.14267
6.53783	3.34077
6.55616	3.5004
6.5745	3.63311
6.59284	3.87352
6.61117	4.10817
6.62951	4.53129
6.64785	4.60245
6.66618	4.85441
6.68452	5.44101
6.70286	5.48717
6.72119	5.88145
6.73953	6.53537
6.75787	6.87002
6.77621	7.27969
6.79454	7.68166
6.81288	8.48175
6.83122	9.29146
6.84955	10.1204
6.86789	10.9013
6.88623	12.1706
6.90456	12.8015
6.9229	14.1593
6.94124	15.3979
6.95957	17.127
6.97791	18.3771
6.99625	20.5658
7.01459	22.5161
7.03292	24.1547
7.05126	26.5165
7.0696	28.8302
7.08793	32.1883
7.10627	35.7926
7.12461	39.9219
7.14294	44.232
7.16128	49.123
7.17962	56.2776
7.19795	63.7516
7.21629	73.5835
7.23463	85.5406
7.25296	98.4229
7.2713	112.142
7.28964	128.186
7.30798	140.462
7.32631	147.386
7.34465	139.749
7.36299	120.514
7.38132	96.6515
7.39966	71.5852
7.418	51.0444
7.43633	35.4868
7.45467	26.1453
7.47301	20.6562
7.49134	15.7999
7.50968	12.311
7.52802	9.0145
7.54636	6.3315
7.56469	4.78901
7.58303	3.80813
7.60137	3.02727
7.6197	2.7734
7.63804	2.40989
7.65638	2.29065
7.67471	2.05216
7.69305	1.96753
7.71139	1.90984
7.72972	1.70981
7.74806	1.64057
7.7664	1.56749
7.78473	1.44824
7.80307	1.46555
7.82141	1.37901
7.83975	1.35977
7.85808	1.25399
7.87642	1.20399
7.89476	1.25591
7.91309	1.15783
7.93143	1.17321
7.94977	0.994345
7.9681	0.9328
7.98644	0.973189
8.00478	0.942416
8.02311	1.03666
8.04145	0.892411
8.05979	0.877024
8.07813	0.982806
8.09646	0.850098
8.1148	0.884717
8.13314	0.907797
8.15147	0.817402
8.16981	0.825095
8.18815	0.72893
8.20648	0.736623
8.22482	0.796246
8.24316	0.773166
8.26149	0.821249
8.27983	0.74624
8.29817	0.736623
8.3165	0.759703
8.33484	0.753933
8.35318	0.640459
8.37152	0.725084
8.38985	0.688541
8.40819	0.703927
8.42653	0.71739
8.44486	0.725084
8.4632	0.625072
8.48154	0.721237
8.49987	0.698157
8.51821	0.678924
8.53655	0.650075
8.55488	0.671231
8.57322	0.665461
8.59156	0.678924
8.6099	0.592376
8.62823	0.603916
8.64657	0.605839
8.66491	0.653922
8.68324	0.628919
8.70158	0.584683
8.71992	0.621226
8.73825	0.619302
8.75659	0.58276
8.77493	0.532754
8.79326	0.638535
8.8116	0.625072
8.82994	0.53083
8.84828	0.619302
8.86661	0.584683
8.88495	0.601993
8.90329	0.563527
8.92162	0.575066
8.93996	0.521214
8.9583	0.503904
8.97663	0.592376
8.99497	0.555833
9.01331	0.54237
9.03164	0.621226
9.04998	0.517367
9.06832	0.540447
9.08665	0.532754
9.10499	0.519291
9.12333	0.557757
9.14167	0.580836
9.16	0.511597
9.17834	0.525061
9.19668	0.55391
9.21501	0.55968
9.23335	0.628919
9.25169	0.511597
9.27002	0.496211
9.28836	0.57699
9.3067	0.578913
9.32503	0.494288
9.34337	0.501981
9.36171	0.517367
9.38005	0.546217
9.39838	0.521214
9.41672	0.432742
9.43506	0.475055
9.45339	0.478901
9.47173	0.534677
9.49007	0.478901
9.5084	0.501981
9.52674	0.538524
9.54508	0.484671
9.56341	0.505828
9.58175	0.461592
9.60009	0.505828
9.61842	0.430819
9.63676	0.488518
9.6551	0.507751
9.67344	0.453899
9.69177	0.484671
9.71011	0.521214
9.72845	0.478901
9.74678	0.498134
9.76512	0.513521
9.78346	0.463515
9.80179	0.444282
9.82013	0.450052
9.83847	0.461592
9.8568	0.451975
9.87514	0.411586
9.89348	0.457745
9.91182	0.446205
9.93015	0.480825
9.94849	0.440435
9.96683	0.423126
9.98516	0.521214
10.0035	0.426972
10.0218	0.426972
10.0402	0.463515
10.0585	0.453899
10.0768	0.417356
10.0952	0.471208
10.1135	0.501981
10.1319	0.442359
10.1502	0.486595
10.1685	0.461592
10.1869	0.438512
10.2052	0.434666
10.2235	0.446205
10.2419	0.421202
10.2602	0.476978
10.2786	0.419279
10.2969	0.430819
10.3152	0.476978
10.3336	0.425049
10.3519	0.455822
10.3702	0.480825
10.3886	0.426972
10.4069	0.436589
10.4252	0.459668
10.4436	0.475055
10.4619	0.432742
10.4803	0.428896
10.4986	0.463515
10.5169	0.417356
10.5353	0.430819
10.5536	0.475055
10.5719	0.476978
10.5903	0.428896
10.6086	0.473132
10.627	0.432742
10.6453	0.413509
10.6636	0.36735
10.682	0.486595
10.7003	0.459668
10.7186	0.430819
10.737	0.425049
10.7553	0.442359
10.7736	0.428896
10.792	0.37889
10.8103	0.409663
10.8287	0.486595
10.847	0.38466
10.8653	0.480825
10.8837	0.403893
10.902	0.419279
10.9203	0.388506
10.9387	0.455822
10.957	0.457745
10.9754	0.446205
10.9937	0.421202
11.012	0.419279
11.0304	0.419279
11.0487	0.38466
11.067	0.382736
11.0854	0.419279
11.1037	0.421202
11.1221	0.444282
11.1404	0.465438
11.1587	0.386583
11.1771	0.36735
11.1954	0.421202
11.2137	0.453899
11.2321	0.436589
11.2504	0.382736
11.2687	0.38466
11.2871	0.407739
11.3054	0.35581
11.3238	0.353887
11.3421	0.415433
11.3604	0.405816
11.3788	0.376967
11.3971	0.423126
11.4154	0.334654
11.4338	0.415433
11.4521	0.421202
11.4705	0.417356
11.4888	0.380813
11.5071	0.37312
11.5255	0.342347
11.5438	0.3962
11.5621	0.401969
11.5805	0.413509
11.5988	0.371197
11.6171	0.376967
11.6355	0.434666
11.6538	0.380813
11.6722	0.417356
11.6905	0.403893
11.7088	0.3962
11.7272	0.392353
11.7455	0.409663
11.7638	0.457745
11.7822	0.353887
11.8005	0.36158
11.8189	0.326961
11.8372	0.37889
11.8555	0.417356
11.8739	0.3962
11.8922	0.36735
11.9105	0.394276
11.9289	0.403893
11.9472	0.446205
11.9655	0.39043
11.9839	0.3962
12.0022	0.426972
12.0206	0.375043
12.0389	0.405816
12.0572	0.455822
12.0756	0.35581
12.0939	0.38466
12.1122	0.442359
12.1306	0.398123
12.1489	0.430819
12.1673	0.442359
12.1856	0.400046
12.2039	0.500058
12.2223	0.453899
12.2406	0.434666
12.2589	0.465438
12.2773	0.507751
12.2956	0.455822
12.3139	0.453899
12.3323	0.496211
12.3506	0.55968
12.369	0.500058
12.3873	0.573143
12.4056	0.521214
12.424	0.626995
12.4423	0.619302
12.4606	0.753933
12.479	0.727007
12.4973	0.836635
12.5157	0.905874
12.534	1.00589
12.5523	1.05781
12.5707	1.22322
12.589	1.46171
12.6073	1.49825
12.6257	1.70981
12.644	2.00792
12.6624	2.19833
12.6807	2.32527
12.699	2.38874
12.7174	2.18294
12.7357	1.84637
12.754	1.47709
12.7724	1.15783
12.7907	1.00204
12.809	0.694311
12.8274	0.642382
12.8457	0.567373
12.8641	0.584683
12.8824	0.513521
12.9007	0.525061
12.9191	0.428896
12.9374	0.444282
12.9557	0.421202
12.9741	0.3962
12.9924	0.386583
13.0108	0.351964
13.0291	0.403893
13.0474	0.415433
13.0658	0.425049
13.0841	0.400046
13.1024	0.405816
13.1208	0.37889
13.1391	0.37889
13.1574	0.334654
13.1758	0.421202
13.1941	0.357734
13.2125	0.340424
13.2308	0.328884
13.2491	0.346194
13.2675	0.382736
13.2858	0.325038
13.3041	0.319268
13.3225	0.348117
13.3408	0.348117
13.3592	0.325038
13.3775	0.36158
13.3958	0.363503
13.4142	0.417356
13.4325	0.338501
13.4508	0.425049
13.4692	0.376967
13.4875	0.380813
13.5058	0.351964
13.5242	0.3962
13.5425	0.35004
13.5609	0.359657
13.5792	0.334654
13.5975	0.369273
13.6159	0.363503
13.6342	0.365427
13.6525	0.376967
13.6709	0.398123
13.6892	0.323114
13.7076	0.35581
13.7259	0.34427
13.7442	0.359657
13.7626	0.319268
13.7809	0.326961
13.7992	0.342347
13.8176	0.363503
13.8359	0.328884
13.8542	0.353887
13.8726	0.386583
13.8909	0.400046
13.9093	0.321191
13.9276	0.36735
13.9459	0.323114
13.9643	0.353887
13.9826	0.353887
14.0009	0.326961
14.0193	0.392353
14.0376	0.305805
14.056	0.330807
14.0743	0.37889
14.0926	0.37889
14.111	0.328884
14.1293	0.332731
14.1476	0.357734
14.166	0.380813
14.1843	0.353887
14.2026	0.328884
14.221	0.290418
14.2393	0.313498
14.2577	0.392353
14.276	0.382736
14.2943	0.380813
14.3127	0.382736
14.331	0.394276
14.3493	0.332731
14.3677	0.34427
14.386	0.394276
14.4044	0.35004
14.4227	0.411586
14.441	0.37312
14.4594	0.37312
14.4777	0.365427
14.496	0.369273
14.5144	0.380813
14.5327	0.403893
14.5511	0.36158
14.5694	0.407739
14.5877	0.446205
14.6061	0.357734
14.6244	0.430819
14.6427	0.451975
14.6611	0.417356
14.6794	0.426972
14.6977	0.411586
14.7161	0.415433
14.7344	0.371197
14.7528	0.38466
14.7711	0.407739
14.7894	0.39043
14.8078	0.346194
14.8261	0.34427
14.8444	0.38466
14.8628	0.348117
14.8811	0.36158
14.8995	0.375043
14.9178	0.357734
14.9361	0.305805
14.9545	0.330807
14.9728	0.325038
14.9911	0.36158
15.0095	0.321191
15.0278	0.321191
15.0461	0.326961
15.0645	0.35004
15.0828	0.376967
15.1012	0.363503
15.1195	0.371197
15.1378	0.39043
15.1562	0.36735
15.1745	0.376967
15.1928	0.380813
15.2112	0.330807
15.2295	0.298111
15.2479	0.348117
15.2662	0.359657
15.2845	0.305805
15.3029	0.386583
15.3212	0.371197
15.3395	0.380813
15.3579	0.338501
15.3762	0.359657
15.3945	0.305805
15.4129	0.363503
15.4312	0.365427
15.4496	0.332731
15.4679	0.292341
15.4862	0.363503
15.5046	0.338501
15.5229	0.37889
15.5412	0.35004
15.5596	0.39043
15.5779	0.392353
15.5963	0.359657
15.6146	0.415433
15.6329	0.413509
15.6513	0.3962
15.6696	0.425049
15.6879	0.394276
15.7063	0.467362
15.7246	0.453899
15.7429	0.461592
15.7613	0.528907
15.7796	0.5366
15.798	0.573143
15.8163	0.53083
15.8346	0.615456
15.853	0.640459
15.8713	0.71739
15.8896	0.696234
15.908	0.671231
15.9263	0.702004
15.9447	0.7347
15.963	0.665461
15.9813	0.623149
15.9997	0.580836
16.018	0.55968
16.0363	0.54814
16.0547	0.486595
16.073	0.473132
16.0914	0.436589
16.1097	0.426972
16.128	0.425049
16.1464	0.432742
16.1647	0.409663
16.183	0.38466
16.2014	0.37312
16.2197	0.353887
16.238	0.417356
16.2564	0.376967
16.2747	0.392353
16.2931	0.336577
16.3114	0.35581
16.3297	0.363503
16.3481	0.340424
16.3664	0.371197
16.3847	0.36735
16.4031	0.332731
16.4214	0.328884
16.4398	0.313498
16.4581	0.386583
16.4764	0.342347
16.4948	0.303881
16.5131	0.359657
16.5314	0.363503
16.5498	0.375043
16.5681	0.346194
16.5864	0.351964
16.6048	0.36735
16.6231	0.323114
16.6415	0.328884
16.6598	0.348117
16.6781	0.369273
16.6965	0.363503
16.7148	0.346194
16.7331	0.346194
16.7515	0.35004
16.7698	0.357734
16.7882	0.35581
16.8065	0.371197
16.8248	0.332731
16.8432	0.376967
16.8615	0.37312
16.8798	0.369273
16.8982	0.35581
16.9165	0.36158
16.9348	0.353887
16.9532	0.388506
16.9715	0.36735
16.9899	0.35004
17.0082	0.359657
17.0265	0.34427
17.0449	0.407739
17.0632	0.415433
17.0815	0.351964
17.0999	0.403893
17.1182	0.432742
17.1366	0.348117
17.1549	0.369273
17.1732	0.400046
17.1916	0.3962
17.2099	0.400046
17.2282	0.398123
17.2466	0.432742
17.2649	0.426972
17.2832	0.405816
17.3016	0.478901
17.3199	0.463515
17.3383	0.423126
17.3566	0.438512
17.3749	0.492365
17.3933	0.53083
17.4116	0.588529
17.4299	0.55968
17.4483	0.609686
17.4666	0.609686
17.485	0.578913
17.5033	0.688541
17.5216	0.72316
17.54	0.678924
17.5583	0.648152
17.5766	0.703927
17.595	0.698157
17.6133	0.567373
17.6316	0.625072
17.65	0.621226
17.6683	0.596223
17.6867	0.601993
17.705	0.550063
17.7233	0.513521
17.7417	0.488518
17.76	0.465438
17.7783	0.446205
17.7967	0.500058
17.815	0.465438
17.8334	0.405816
17.8517	0.430819
17.87	0.494288
17.8884	0.451975
17.9067	0.457745
17.925	0.461592
17.9434	0.501981
17.9617	0.476978
17.9801	0.467362
17.9984	0.459668
18.0167	0.507751
18.0351	0.425049
18.0534	0.494288
18.0717	0.525061
18.0901	0.444282
18.1084	0.444282
18.1267	0.442359
18.1451	0.490441
18.1634	0.457745
18.1818	0.480825
18.2001	0.475055
18.2184	0.461592
18.2368	0.484671
18.2551	0.457745
18.2734	0.415433
18.2918	0.436589
18.3101	0.400046
18.3285	0.440435
18.3468	0.426972
18.3651	0.448129
18.3835	0.392353
18.4018	0.392353
18.4201	0.463515
18.4385	0.405816
18.4568	0.423126
18.4751	0.457745
18.4935	0.446205
18.5118	0.467362
18.5302	0.448129
18.5485	0.463515
18.5668	0.451975
18.5852	0.432742
18.6035	0.476978
18.6218	0.488518
18.6402	0.409663
18.6585	0.486595
18.6769	0.486595
18.6952	0.471208
18.7135	0.463515
18.7319	0.453899
18.7502	0.476978
18.7685	0.471208
18.7869	0.459668
18.8052	0.517367
18.8235	0.494288
18.8419	0.459668
18.8602	0.540447
18.8786	0.498134
18.8969	0.540447
18.9152	0.501981
18.9336	0.53083
18.9519	0.546217
18.9702	0.532754
18.9886	0.58276
19.0069	0.567373
19.0253	0.628919
19.0436	0.619302
19.0619	0.671231
19.0803	0.719314
19.0986	0.827018
19.1169	0.800092
19.1353	0.986652
19.1536	0.93857
19.1719	1.03473
19.1903	1.12321
19.2086	1.21168
19.227	1.36747
19.2453	1.59826
19.2636	1.65788
19.282	2.006
19.3003	2.38489
19.3186	3.00035
19.337	3.37539
19.3553	4.24472
19.3737	4.84094
19.392	5.98146
19.4103	6.71616
19.4287	7.44124
19.447	7.57203
19.4653	7.60665
19.4837	6.89887
19.502	6.00262
19.5204	4.73324
19.5387	3.86583
19.557	2.98111
19.5754	2.3195
19.5937	1.90022
19.612	1.59057
19.6304	1.45401
19.6487	1.25399
19.667	1.15783
19.6854	0.969343
19.7037	0.942416
19.7221	0.890487
19.7404	0.865484
19.7587	0.794322
19.7771	0.742393
19.7954	0.711621
19.8137	0.621226
19.8321	0.632765
19.8504	0.628919
19.8688	0.555833
19.8871	0.56545
19.9054	0.592376
19.9238	0.511597
19.9421	0.540447
19.9604	0.521214
19.9788	0.544294
19.9971	0.523137
20.0154	0.482748
20.0338	0.557757
20.0521	0.501981
20.0705	0.511597
20.0888	0.507751
20.1071	0.534677
20.1255	0.523137
20.1438	0.500058
20.1621	0.473132
20.1805	0.432742
20.1988	0.457745
20.2172	0.509674
20.2355	0.469285
20.2538	0.490441
20.2722	0.494288
20.2905	0.490441
20.3088	0.486595
20.3272	0.430819
20.3455	0.503904
20.3638	0.551987
20.3822	0.496211
20.4005	0.486595
20.4189	0.546217
20.4372	0.503904
20.4555	0.525061
20.4739	0.517367
20.4922	0.501981
20.5105	0.540447
20.5289	0.551987
20.5472	0.56545
20.5656	0.488518
20.5839	0.517367
20.6022	0.575066
20.6206	0.546217
20.6389	0.561603
20.6572	0.569296
20.6756	0.54814
20.6939	0.53083
20.7122	0.509674
20.7306	0.561603
20.7489	0.586606
20.7673	0.561603
20.7856	0.584683
20.8039	0.561603
20.8223	0.601993
20.8406	0.567373
20.8589	0.580836
20.8773	0.563527
20.8956	0.621226
20.914	0.638535
20.9323	0.575066
20.9506	0.636612
20.969	0.632765
20.9873	0.623149
21.0056	0.561603
21.024	0.578913
21.0423	0.528907
21.0607	0.523137
21.079	0.557757
21.0973	0.55968
21.1157	0.54237
21.134	0.544294
21.1523	0.5366
21.1707	0.57122
21.189	0.584683
21.2073	0.607762
21.2257	0.598146
21.244	0.56545
21.2624	0.601993
21.2807	0.56545
21.299	0.644305
21.3174	0.617379
21.3357	0.611609
21.354	0.661615
21.3724	0.680848
21.3907	0.759703
21.4091	0.730854
21.4274	0.74047
21.4457	0.890487
21.4641	0.92126
21.4824	0.942416
21.5007	1.12898
21.5191	1.15206
21.5374	1.37131
21.5557	1.45786
21.5741	1.61172
21.5924	1.73097
21.6108	2.04254
21.6291	2.25795
21.6474	2.4272
21.6658	2.68877
21.6841	2.7734
21.7024	2.90418
21.7208	2.91764
21.7391	2.64838
21.7575	2.66377
21.7758	2.47144
21.7941	2.23872
21.8125	2.07332
21.8308	1.92715
21.8491	1.6098
21.8675	1.4367
21.8858	1.32323
21.9041	1.33862
21.9225	1.21745
21.9408	1.17706
21.9592	1.12321
21.9775	1.1309
21.9958	1.11359
22.0142	1.27707
22.0325	1.2963
22.0508	1.27707
22.0692	1.40785
22.0875	1.43093
22.1059	1.40208
22.1242	1.34823
22.1425	1.30015
22.1609	1.20783
22.1792	1.12898
22.1975	0.986652
22.2159	0.986652
22.2342	0.973189
22.2525	0.90395
22.2709	0.880871
22.2892	0.819325
22.3076	0.71739
22.3259	0.805862
22.3442	0.74624
22.3626	0.648152
22.3809	0.651998
22.3992	0.613532
22.4176	0.605839
22.4359	0.611609
22.4543	0.586606
22.4726	0.55391
22.4909	0.55968
22.5093	0.492365
22.5276	0.498134
22.5459	0.513521
22.5643	0.488518
22.5826	0.475055
22.6009	0.457745
22.6193	0.513521
22.6376	0.496211
22.656	0.467362
22.6743	0.475055
22.6926	0.484671
22.711	0.465438
22.7293	0.465438
22.7476	0.532754
22.766	0.425049
22.7843	0.500058
22.8027	0.409663
22.821	0.463515
22.8393	0.442359
22.8577	0.475055
22.876	0.455822
22.8943	0.392353
22.9127	0.411586
22.931	0.388506
22.9494	0.465438
22.9677	0.494288
22.986	0.494288
23.0044	0.421202
23.0227	0.400046
23.041	0.515444
23.0594	0.425049
23.0777	0.444282
23.096	0.482748
23.1144	0.438512
23.1327	0.488518
23.1511	0.457745
23.1694	0.471208
23.1877	0.480825
23.2061	0.471208
23.2244	0.521214
23.2427	0.463515
23.2611	0.482748
23.2794	0.5366
23.2978	0.486595
23.3161	0.575066
23.3344	0.526984
23.3528	0.54237
23.3711	0.482748
23.3894	0.509674
23.4078	0.476978
23.4261	0.465438
23.4444	0.511597
23.4628	0.455822
23.4811	0.421202
23.4995	0.430819
23.5178	0.450052
23.5361	0.442359
23.5545	0.425049
23.5728	0.465438
23.5911	0.455822
23.6095	0.421202
23.6278	0.448129
23.6462	0.405816
23.6645	0.426972
23.6828	0.442359
23.7012	0.446205
23.7195	0.407739
23.7378	0.411586
23.7562	0.411586
23.7745	0.398123
23.7928	0.450052
23.8112	0.528907
23.8295	0.496211
23.8479	0.538524
23.8662	0.511597
23.8845	0.555833
23.9029	0.638535
23.9212	0.605839
23.9395	0.646228
23.9579	0.646228
23.9762	0.71739
23.9946	0.790476
24.0129	0.834712
24.0312	0.852021
24.0496	0.911644
24.0679	0.977036
24.0862	1.06551
24.1046	1.03089
24.1229	1.10013
24.1412	1.0732
24.1596	1.05589
24.1779	1.02127
24.1963	0.948186
24.2146	0.807786
24.2329	0.807786
24.2513	0.719314
24.2696	0.767396
24.2879	0.653922
24.3063	0.590453
24.3246	0.657768
24.343	0.55968
24.3613	0.56545
24.3796	0.584683
24.398	0.584683
24.4163	0.54237
24.4346	0.601993
24.453	0.551987
24.4713	0.586606
24.4897	0.586606
24.508	0.569296
24.5263	0.625072
24.5447	0.557757
24.563	0.569296
24.5813	0.55968
24.5997	0.532754
24.618	0.55391
24.6363	0.540447
24.6547	0.546217
24.673	0.482748
24.6914	0.494288
24.7097	0.511597
24.728	0.432742
24.7464	0.448129
24.7647	0.500058
24.783	0.471208
24.8014	0.438512
24.8197	0.417356
24.8381	0.417356
24.8564	0.465438
24.8747	0.432742
24.8931	0.382736
24.9114	0.405816
24.9297	0.338501
24.9481	0.375043
24.9664	0.363503
24.9847	0.35004
25.0031	0.386583
25.0214	0.317344
25.0398	0.380813
25.0581	0.3962
25.0764	0.37312
25.0948	0.369273
25.1131	0.375043
25.1314	0.357734
25.1498	0.36735
25.1681	0.400046
25.1865	0.330807
25.2048	0.34427
25.2231	0.336577
25.2415	0.36158
25.2598	0.326961
25.2781	0.363503
25.2965	0.359657
25.3148	0.36735
25.3331	0.386583
25.3515	0.363503
25.3698	0.407739
25.3882	0.38466
25.4065	0.388506
25.4248	0.405816
25.4432	0.39043
25.4615	0.36735
25.4798	0.376967
25.4982	0.417356
25.5165	0.436589
25.5349	0.538524
25.5532	0.428896
25.5715	0.434666
25.5899	0.550063
25.6082	0.509674
25.6265	0.494288
25.6449	0.478901
25.6632	0.480825
25.6815	0.442359
25.6999	0.488518
25.7182	0.436589
25.7366	0.465438
25.7549	0.442359
25.7732	0.428896
25.7916	0.386583
25.8099	0.426972
25.8282	0.398123
25.8466	0.357734
25.8649	0.426972
25.8833	0.375043
25.9016	0.365427
25.9199	0.38466
25.9383	0.386583
25.9566	0.326961
25.9749	0.353887
25.9933	0.342347
26.0116	0.363503
26.0299	0.338501
26.0483	0.346194
26.0666	0.340424
26.085	0.342347
26.1033	0.328884
26.1216	0.353887
26.14	0.365427
26.1583	0.35581
26.1766	0.296188
26.195	0.301958
26.2133	0.336577
26.2317	0.388506
26.25	0.348117
26.2683	0.325038
26.2867	0.298111
26.305	0.303881
26.3233	0.37312
26.3417	0.34427
26.36	0.348117
26.3784	0.346194
26.3967	0.371197
26.415	0.359657
26.4334	0.36735
26.4517	0.346194
26.47	0.36158
26.4884	0.392353
26.5067	0.403893
26.525	0.494288
26.5434	0.494288
26.5617	0.473132
26.5801	0.511597
26.5984	0.561603
26.6167	0.546217
26.6351	0.503904
26.6534	0.496211
26.6717	0.523137
26.6901	0.467362
26.7084	0.486595
26.7268	0.471208
26.7451	0.534677
26.7634	0.401969
26.7818	0.463515
26.8001	0.434666
26.8184	0.521214
26.8368	0.436589
26.8551	0.432742
26.8734	0.473132
26.8918	0.494288
26.9101	0.432742
26.9285	0.451975
26.9468	0.340424
26.9651	0.426972
26.9835	0.409663
27.0018	0.405816
27.0201	0.446205
27.0385	0.455822
27.0568	0.426972
27.0752	0.450052
27.0935	0.5366
27.1118	0.523137
27.1302	0.505828
27.1485	0.563527
27.1668	0.573143
27.1852	0.600069
27.2035	0.732777
27.2218	0.688541
27.2402	0.773166
27.2585	0.894334
27.2769	0.925107
27.2952	0.957803
27.3135	1.03089
27.3319	1.08666
27.3502	1.08859
27.3685	0.923183
27.3869	0.846251
27.4052	0.95011
27.4236	0.934723
27.4419	0.855868
27.4602	0.74047
27.4786	0.744317
27.4969	0.696234
27.5152	0.611609
27.5336	0.54237
27.5519	0.57699
27.5702	0.578913
27.5886	0.551987
27.6069	0.476978
27.6253	0.467362
27.6436	0.490441
27.6619	0.403893
27.6803	0.501981
27.6986	0.417356
27.7169	0.430819
27.7353	0.419279
27.7536	0.407739
27.772	0.386583
27.7903	0.415433
27.8086	0.407739
27.827	0.407739
27.8453	0.35004
27.8636	0.421202
27.882	0.398123
27.9003	0.3962
27.9187	0.348117
27.937	0.386583
27.9553	0.425049
27.9737	0.37312
27.992	0.419279
28.0103	0.39043
28.0287	0.401969
28.047	0.423126
28.0653	0.426972
28.0837	0.482748
28.102	0.486595
28.1204	0.482748
28.1387	0.513521
28.157	0.586606
28.1754	0.592376
28.1937	0.673155
28.212	0.655845
28.2304	0.744317
28.2487	0.786629
28.2671	0.838558
28.2854	0.980882
28.3037	0.998192
28.3221	0.967419
28.3404	0.994345
28.3587	1.01743
28.3771	0.948186
28.3954	0.953956
28.4137	0.863561
28.4321	0.850098
28.4504	0.694311
28.4688	0.692388
28.4871	0.636612
28.5054	0.525061
28.5238	0.54814
28.5421	0.525061
28.5604	0.3962
28.5788	0.428896
28.5971	0.438512
28.6155	0.467362
28.6338	0.409663
28.6521	0.444282
28.6705	0.411586
28.6888	0.440435
28.7071	0.388506
28.7255	0.376967
28.7438	0.386583
28.7621	0.37889
28.7805	0.365427
28.7988	0.398123
28.8172	0.336577
28.8355	0.338501
28.8538	0.328884
28.8722	0.325038
28.8905	0.296188
28.9088	0.307728
28.9272	0.305805
28.9455	0.369273
28.9639	0.305805
28.9822	0.309651
29.0005	0.292341
29.0189	0.284648
29.0372	0.263492
29.0555	0.271185
29.0739	0.321191
29.0922	0.296188
29.1105	0.294265
29.1289	0.244259
29.1472	0.313498
29.1656	0.261569
29.1839	0.290418
29.2022	0.275032
29.2206	0.330807
29.2389	0.309651
29.2572	0.257722
29.2756	0.340424
29.2939	0.276955
29.3123	0.290418
29.3306	0.328884
29.3489	0.286572
29.3673	0.342347
29.3856	0.280802
29.4039	0.248106
29.4223	0.36158
29.4406	0.332731
29.459	0.326961
29.4773	0.303881
29.4956	0.290418
29.514	0.300035
29.5323	0.290418
29.5506	0.298111
29.569	0.301958
29.5873	0.321191
29.6056	0.280802
29.624	0.323114
29.6423	0.315421
29.6607	0.328884
29.679	0.296188
29.6973	0.305805
29.7157	0.328884
29.734	0.326961
29.7523	0.307728
29.7707	0.303881
29.789	0.265415
29.8074	0.313498
29.8257	0.307728
29.844	0.288495
29.8624	0.261569
29.8807	0.303881
29.899	0.292341
29.9174	0.228873
29.9357	0.255799
29.954	0.250029
29.9724	0.242336
29.9907	0.257722
30.0091	0.288495
30.0274	0.282725
30.0457	0.240412
30.0641	0.234642
30.0824	0.269262
30.1007	0.240412
30.1191	0.273108
30.1374	0.273108
30.1558	0.271185
30.1741	0.253875
30.1924	0.265415
30.2108	0.236566
30.2291	0.217333
30.2474	0.236566
30.2658	0.213486
30.2841	0.221179
30.3024	0.213486
30.3208	0.225026
30.3391	0.234642
30.3575	0.267339
30.3758	0.246182
30.3941	0.219256
30.4125	0.223103
30.4308	0.232719
30.4491	0.255799
30.4675	0.288495
30.4858	0.278878
30.5042	0.244259
30.5225	0.269262
30.5408	0.253875
30.5592	0.286572
30.5775	0.253875
30.5958	0.298111
30.6142	0.298111
30.6325	0.284648
30.6508	0.248106
30.6692	0.276955
30.6875	0.250029
30.7059	0.263492
30.7242	0.261569
30.7425	0.240412
30.7609	0.261569
30.7792	0.271185
30.7975	0.269262
30.8159	0.298111
30.8342	0.246182
30.8526	0.20387
30.8709	0.273108
30.8892	0.286572
30.9076	0.250029
30.9259	0.225026
30.9442	0.269262
30.9626	0.250029
30.9809	0.276955
30.9992	0.311574
31.0176	0.309651
31.0359	0.321191
31.0543	0.363503
31.0726	0.338501
31.0909	0.405816
31.1093	0.371197
31.1276	0.346194
31.1459	0.392353
31.1643	0.401969
31.1826	0.3962
31.201	0.36735
31.2193	0.330807
31.2376	0.35581
31.256	0.38466
31.2743	0.357734
31.2926	0.301958
31.311	0.326961
31.3293	0.296188
31.3477	0.323114
31.366	0.271185
31.3843	0.284648
31.4027	0.371197
31.421	0.423126
31.4393	0.342347
31.4577	0.36158
31.476	0.301958
31.4943	0.325038
31.5127	0.317344
31.531	0.323114
31.5494	0.288495
31.5677	0.323114
31.586	0.330807
31.6044	0.265415
31.6227	0.230796
31.641	0.257722
31.6594	0.267339
31.6777	0.234642
31.6961	0.275032
31.7144	0.219256
31.7327	0.263492
31.7511	0.234642
31.7694	0.217333
31.7877	0.217333
31.8061	0.223103
31.8244	0.246182
31.8427	0.234642
31.8611	0.275032
31.8794	0.259645
31.8978	0.240412
31.9161	0.242336
31.9344	0.238489
31.9528	0.238489
31.9711	0.230796
31.9894	0.20387
32.0078	0.223103
32.0261	0.228873
32.0445	0.226949
32.0628	0.250029
32.0811	0.267339
32.0995	0.238489
32.1178	0.261569
32.1361	0.207716
32.1545	0.211563
32.1728	0.271185
32.1911	0.261569
32.2095	0.238489
32.2278	0.240412
32.2462	0.251952
32.2645	0.259645
32.2828	0.263492
32.3012	0.273108
32.3195	0.301958
32.3378	0.290418
32.3562	0.276955
32.3745	0.298111
32.3929	0.303881
32.4112	0.271185
32.4295	0.282725
32.4479	0.294265
32.4662	0.253875
32.4845	0.246182
32.5029	0.255799
32.5212	0.309651
32.5395	0.238489
32.5579	0.265415
32.5762	0.250029
32.5946	0.236566
32.6129	0.278878
32.6312	0.263492
32.6496	0.232719
32.6679	0.248106
32.6862	0.215409
32.7046	0.265415
32.7229	0.271185
32.7413	0.223103
32.7596	0.257722
32.7779	0.211563
32.7963	0.230796
32.8146	0.248106
32.8329	0.217333
32.8513	0.205793
32.8696	0.276955
32.888	0.207716
32.9063	0.238489
32.9246	0.269262
32.943	0.275032
32.9613	0.257722
32.9796	0.217333
32.998	0.269262
33.0163	0.226949
33.0346	0.246182
33.053	0.238489
33.0713	0.250029
33.0897	0.211563
33.108	0.17502
33.1263	0.225026
33.1447	0.248106
33.163	0.246182
33.1813	0.263492
33.1997	0.228873
33.218	0.20964
33.2364	0.246182
33.2547	0.236566
33.273	0.230796
33.2914	0.238489
33.3097	0.240412
33.328	0.253875
33.3464	0.234642
33.3647	0.232719
33.383	0.234642
33.4014	0.259645
33.4197	0.271185
33.4381	0.284648
33.4564	0.269262
33.4747	0.300035
33.4931	0.228873
33.5114	0.251952
33.5297	0.275032
33.5481	0.296188
33.5664	0.317344
33.5848	0.35004
33.6031	0.35004
33.6214	0.363503
33.6398	0.369273
33.6581	0.432742
33.6764	0.476978
33.6948	0.532754
33.7131	0.573143
33.7314	0.55391
33.7498	0.57122
33.7681	0.563527
33.7865	0.669308
33.8048	0.580836
33.8231	0.555833
33.8415	0.53083
33.8598	0.53083
33.8781	0.496211
33.8965	0.421202
33.9148	0.403893
33.9332	0.376967
33.9515	0.317344
33.9698	0.340424
33.9882	0.338501
34.0065	0.330807
34.0248	0.292341
34.0432	0.284648
34.0615	0.242336
34.0798	0.278878
34.0982	0.273108
34.1165	0.284648
34.1349	0.221179
34.1532	0.242336
34.1715	0.257722
34.1899	0.253875
34.2082	0.248106
34.2265	0.263492
34.2449	0.236566
34.2632	0.217333
34.2816	0.234642
34.2999	0.196176
34.3182	0.244259
34.3366	0.259645
34.3549	0.226949
34.3732	0.18079
34.3916	0.194253
34.4099	0.215409
34.4282	0.221179
34.4466	0.215409
34.4649	0.1981
34.4833	0.230796
34.5016	0.221179
34.5199	0.257722
34.5383	0.18656
34.5566	0.228873
34.5749	0.261569
34.5933	0.217333
34.6116	0.248106
34.63	0.196176
34.6483	0.167327
34.6666	0.221179
34.685	0.19233
34.7033	0.16925
34.7216	0.230796
34.74	0.20964
34.7583	0.259645
34.7767	0.248106
34.795	0.207716
34.8133	0.248106
34.8317	0.20387
34.85	0.219256
34.8683	0.215409
34.8867	0.236566
34.905	0.20964
34.9233	0.225026
34.9417	0.20387
34.96	0.215409
34.9784	0.223103
34.9967	0.226949
35.015	0.267339
35.0334	0.242336
35.0517	0.244259
35.07	0.257722
35.0884	0.263492
35.1067	0.215409
35.1251	0.276955
35.1434	0.246182
35.1617	0.292341
35.1801	0.269262
35.1984	0.244259
35.2167	0.251952
35.2351	0.261569
35.2534	0.296188
35.2717	0.284648
35.2901	0.319268
35.3084	0.323114
35.3268	0.36735
35.3451	0.348117
35.3634	0.413509
35.3818	0.403893
35.4001	0.3962
35.4184	0.411586
35.4368	0.411586
35.4551	0.375043
35.4735	0.382736
35.4918	0.36735
35.5101	0.340424
35.5285	0.348117
35.5468	0.296188
35.5651	0.321191
35.5835	0.280802
35.6018	0.290418
35.6201	0.223103
35.6385	0.246182
35.6568	0.246182
35.6752	0.284648
35.6935	0.280802
35.7118	0.273108
35.7302	0.221179
35.7485	0.232719
35.7668	0.267339
35.7852	0.250029
35.8035	0.234642
35.8219	0.196176
35.8402	0.205793
35.8585	0.242336
35.8769	0.217333
35.8952	0.230796
35.9135	0.225026
35.9319	0.234642
35.9502	0.215409
35.9685	0.217333
35.9869	0.194253
36.0052	0.292341
36.0236	0.215409
36.0419	0.1981
36.0602	0.196176
36.0786	0.211563
36.0969	0.267339
36.1152	0.18079
36.1336	0.205793
36.1519	0.213486
36.1703	0.196176
36.1886	0.225026
36.2069	0.1981
36.2253	0.207716
36.2436	0.211563
36.2619	0.207716
36.2803	0.205793
36.2986	0.251952
36.317	0.16925
36.3353	0.232719
36.3536	0.211563
36.372	0.215409
36.3903	0.190407
36.4086	0.225026
36.427	0.246182
36.4453	0.228873
36.4636	0.200023
36.482	0.213486
36.5003	0.232719
36.5187	0.211563
36.537	0.230796
36.5553	0.201946
36.5737	0.215409
36.592	0.205793
36.6103	0.17502
36.6287	0.225026
36.647	0.221179
36.6654	0.225026
36.6837	0.217333
36.702	0.182713
36.7204	0.200023
36.7387	0.18079
36.757	0.196176
36.7754	0.217333
36.7937	0.219256
36.812	0.188483
36.8304	0.190407
36.8487	0.173097
36.8671	0.171174
36.8854	0.20387
36.9037	0.165404
36.9221	0.236566
36.9404	0.246182
36.9587	0.219256
36.9771	0.17502
36.9954	0.211563
37.0138	0.20387
37.0321	0.207716
37.0504	0.155787
37.0688	0.194253
37.0871	0.138478
37.1054	0.196176
37.1238	0.157711
37.1421	0.219256
37.1604	0.223103
37.1788	0.213486
37.1971	0.201946
37.2155	0.219256
37.2338	0.188483
37.2521	0.230796
37.2705	0.188483
37.2888	0.194253
37.3071	0.217333
37.3255	0.200023
37.3438	0.188483
37.3622	0.201946
37.3805	0.167327
37.3988	0.225026
37.4172	0.200023
37.4355	0.182713
37.4538	0.159634
37.4722	0.184637
37.4905	0.176943
37.5088	0.190407
37.5272	0.153864
37.5455	0.20387
37.5639	0.226949
37.5822	0.19233
37.6005	0.201946
37.6189	0.150017
37.6372	0.165404
37.6555	0.157711
37.6739	0.215409
37.6922	0.205793
37.7106	0.171174
37.7289	0.18079
37.7472	0.194253
37.7656	0.184637
37.7839	0.194253
37.8022	0.205793
37.8206	0.236566
37.8389	0.226949
37.8573	0.17502
37.8756	0.215409
37.8939	0.221179
37.9123	0.200023
37.9306	0.165404
37.9489	0.213486
37.9673	0.205793
37.9856	0.196176
38.0039	0.205793
38.0223	0.201946
38.0406	0.228873
38.059	0.176943
38.0773	0.205793
38.0956	0.1981
38.114	0.190407
38.1323	0.178867
38.1506	0.1981
38.169	0.213486
38.1873	0.155787
38.2057	0.194253
38.224	0.200023
38.2423	0.215409
38.2607	0.196176
38.279	0.19233
38.2973	0.176943
38.3157	0.217333
38.334	0.213486
38.3523	0.20387
38.3707	0.18656
38.389	0.182713
38.4074	0.20964
38.4257	0.205793
38.444	0.19233
38.4624	0.273108
38.4807	0.190407
38.499	0.1981
38.5174	0.225026
38.5357	0.200023
38.5541	0.200023
38.5724	0.188483
38.5907	0.178867
38.6091	0.213486
38.6274	0.238489
38.6457	0.251952
38.6641	0.205793
38.6824	0.284648
38.7007	0.226949
38.7191	0.238489
38.7374	0.219256
38.7558	0.225026
38.7741	0.244259
38.7924	0.255799
38.8108	0.225026
38.8291	0.225026
38.8474	0.223103
38.8658	0.263492
38.8841	0.20387
38.9025	0.248106
38.9208	0.219256
38.9391	0.201946
38.9575	0.217333
38.9758	0.217333
38.9941	0.253875
39.0125	0.213486
39.0308	0.207716
39.0491	0.215409
39.0675	0.207716
39.0858	0.225026
39.1042	0.215409
39.1225	0.238489
39.1408	0.194253
39.1592	0.215409
39.1775	0.219256
39.1958	0.207716
39.2142	0.246182
39.2325	0.205793
39.2509	0.20964
39.2692	0.232719
39.2875	0.230796
39.3059	0.251952
39.3242	0.230796
39.3425	0.201946
39.3609	0.284648
39.3792	0.253875
39.3975	0.255799
39.4159	0.273108
39.4342	0.251952
39.4526	0.303881
39.4709	0.275032
39.4892	0.351964
39.5076	0.294265
39.5259	0.338501
39.5442	0.307728
39.5626	0.336577
39.5809	0.288495
39.5993	0.251952
39.6176	0.278878
39.6359	0.259645
39.6543	0.278878
39.6726	0.259645
39.6909	0.201946
39.7093	0.228873
39.7276	0.253875
39.746	0.20387
39.7643	0.207716
39.7826	0.275032
39.801	0.240412
39.8193	0.232719
39.8376	0.20387
39.856	0.223103
39.8743	0.242336
39.8926	0.251952
39.911	0.240412
39.9293	0.20964
39.9477	0.253875
39.966	0.242336
39.9843	0.253875
40.0027	0.259645
40.021	0.244259
40.0393	0.242336
40.0577	0.225026
40.076	0.261569
40.0944	0.269262
40.1127	0.20964
40.131	0.253875
40.1494	0.253875
40.1677	0.240412
40.186	0.211563
40.2044	0.255799
40.2227	0.221179
40.241	0.255799
40.2594	0.221179
40.2777	0.196176
40.2961	0.217333
40.3144	0.188483
40.3327	0.221179
40.3511	0.215409
40.3694	0.215409
40.3877	0.253875
40.4061	0.228873
40.4244	0.213486
40.4428	0.263492
40.4611	0.250029
40.4794	0.230796
40.4978	0.253875
40.5161	0.219256
40.5344	0.248106
[truncated: 1,056 more rows]

## Sheet: Cooling 145 °C
2theta	Intensity
3.89731	1.37901
3.91565	1.49056
3.93399	1.46171
3.95232	1.47132
3.97066	1.44247
3.989	1.40978
4.00733	1.35208
4.02567	1.45209
4.04401	1.45594
4.06234	1.36939
4.08068	1.42709
4.09902	1.43286
4.11735	1.35785
4.13569	1.45978
4.15403	1.35785
4.17237	1.32515
4.1907	1.34823
4.20904	1.27322
4.22738	1.33285
4.24571	1.34631
4.26405	1.34439
4.28239	1.43286
4.30072	1.34439
4.31906	1.31746
4.3374	1.329
4.35573	1.31746
4.37407	1.34631
4.39241	1.28284
4.41075	1.31361
4.42908	1.32131
4.44742	1.17129
4.46576	1.26361
4.48409	1.28861
4.50243	1.21745
4.52077	1.27899
4.5391	1.22322
4.55744	1.30592
4.57578	1.22899
4.59411	1.19245
4.61245	1.31746
4.63079	1.25591
4.64913	1.25591
4.66746	1.23283
4.6858	1.17706
4.70414	1.27899
4.72247	1.19245
4.74081	1.23668
4.75915	1.15975
4.77748	1.19822
4.79582	1.14052
4.81416	1.19437
4.83249	1.18283
4.85083	1.20399
4.86917	1.12898
4.8875	1.21745
4.90584	1.13859
4.92418	1.1886
4.94252	1.16937
4.96085	1.19052
4.97919	1.11551
4.99753	1.20783
5.01586	1.2463
5.0342	1.24053
5.05254	1.20014
5.07087	1.07705
5.08921	1.0732
5.10755	1.12321
5.12588	1.21552
5.14422	1.09628
5.16256	1.17129
5.1809	1.17514
5.19923	1.09243
5.21757	1.10974
5.23591	1.13859
5.25424	1.19437
5.27258	1.08474
5.29092	1.10782
5.30925	1.13282
5.32759	1.17898
5.34593	1.17514
5.36426	1.07897
5.3826	1.0732
5.40094	1.09628
5.41927	1.11359
5.43761	1.1886
5.45595	1.13282
5.47429	1.13475
5.49262	1.1636
5.51096	1.1059
5.5293	1.11551
5.54763	1.13282
5.56597	1.09628
5.58431	1.10397
5.60264	1.02127
5.62098	1.20783
5.63932	1.12898
5.65765	1.16552
5.67599	1.14052
5.69433	1.11359
5.71267	1.09436
5.731	1.10782
5.74934	1.13859
5.76768	1.08474
5.78601	1.21552
5.80435	1.08859
5.82269	1.15783
5.84102	1.15398
5.85936	1.20783
5.8777	1.16552
5.89603	1.304
5.91437	1.33477
5.93271	1.1636
5.95104	1.19052
5.96938	1.36939
5.98772	1.26938
6.00606	1.26553
6.02439	1.37901
6.04273	1.35593
6.06107	1.37901
6.0794	1.36747
6.09774	1.48286
6.11608	1.52133
6.13441	1.52133
6.15275	1.51364
6.17109	1.59249
6.18942	1.49633
6.20776	1.68096
6.2261	1.69443
6.24444	1.78482
6.26277	1.89445
6.28111	1.80213
6.29945	1.86945
6.31778	1.85791
6.33612	1.95407
6.35446	2.10794
6.37279	2.05216
6.39113	2.15217
6.40947	2.19064
6.4278	2.36181
6.44614	2.40412
6.46448	2.52721
6.48282	2.67146
6.50115	2.8811
6.51949	3.10228
6.53783	3.12344
6.55616	3.49848
6.5745	3.61773
6.59284	3.80813
6.61117	3.89083
6.62951	4.31396
6.64785	4.5736
6.66618	4.91788
6.68452	5.03135
6.70286	5.43909
6.72119	5.74297
6.73953	6.09686
6.75787	6.4469
6.77621	6.9585
6.79454	7.41239
6.81288	8.09132
6.83122	8.65484
6.84955	9.27222
6.86789	10.1916
6.88623	11.1359
6.90456	12.4072
6.9229	13.2535
6.94124	14.7498
6.95957	16.1038
6.97791	17.3655
6.99625	19.1868
7.01459	21.2544
7.03292	23.1911
7.05126	25.6126
7.0696	27.8301
7.08793	30.8997
7.10627	34.1347
7.12461	37.1851
7.14294	41.6625
7.16128	46.8766
7.17962	52.0118
7.19795	59.1972
7.21629	68.2675
7.23463	78.9456
7.25296	90.9336
7.2713	105.249
7.28964	120.447
7.30798	135.425
7.32631	145.017
7.34465	144.053
7.36299	129.209
7.38132	107.17
7.39966	82.9903
7.418	59.7415
7.43633	42.3895
7.45467	30.2516
7.47301	23.0988
7.49134	18.3021
7.50968	13.9228
7.52802	10.457
7.54636	7.31238
7.56469	5.33908
7.58303	4.13317
7.60137	3.37154
7.6197	2.94072
7.63804	2.71954
7.65638	2.39643
7.67471	2.25603
7.69305	2.05985
7.71139	1.97907
7.72972	1.76559
7.74806	1.67712
7.7664	1.53864
7.78473	1.6098
7.80307	1.37131
7.82141	1.40785
7.83975	1.25591
7.85808	1.24245
7.87642	1.25784
7.89476	1.12513
7.91309	1.18091
7.93143	1.14821
7.94977	1.18091
7.9681	1.05781
7.98644	1.05974
8.00478	1.0155
8.02311	0.95588
8.04145	1.05589
8.05979	0.90972
8.07813	0.934723
8.09646	0.859715
8.1148	0.853945
8.13314	0.880871
8.15147	0.853945
8.16981	0.863561
8.18815	0.830865
8.20648	0.813555
8.22482	0.775089
8.24316	0.821249
8.26149	0.771243
8.27983	0.778936
8.29817	0.771243
8.3165	0.759703
8.33484	0.698157
8.35318	0.665461
8.37152	0.74047
8.38985	0.663538
8.40819	0.644305
8.42653	0.661615
8.44486	0.650075
8.4632	0.613532
8.48154	0.663538
8.49987	0.611609
8.51821	0.667385
8.53655	0.655845
8.55488	0.642382
8.57322	0.669308
8.59156	0.655845
8.6099	0.651998
8.62823	0.636612
8.64657	0.653922
8.66491	0.588529
8.68324	0.603916
8.70158	0.57122
8.71992	0.617379
8.73825	0.615456
8.75659	0.600069
8.77493	0.557757
8.79326	0.642382
8.8116	0.617379
8.82994	0.590453
8.84828	0.544294
8.86661	0.578913
8.88495	0.594299
8.90329	0.54814
8.92162	0.561603
8.93996	0.592376
8.9583	0.561603
8.97663	0.532754
8.99497	0.598146
9.01331	0.494288
9.03164	0.578913
9.04998	0.526984
9.06832	0.580836
9.08665	0.5366
9.10499	0.557757
9.12333	0.54814
9.14167	0.546217
9.16	0.526984
9.17834	0.505828
9.19668	0.525061
9.21501	0.525061
9.23335	0.546217
9.25169	0.476978
9.27002	0.534677
9.28836	0.511597
9.3067	0.500058
9.32503	0.484671
9.34337	0.490441
9.36171	0.551987
9.38005	0.509674
9.39838	0.494288
9.41672	0.500058
9.43506	0.482748
9.45339	0.517367
9.47173	0.505828
9.49007	0.463515
9.5084	0.503904
9.52674	0.478901
9.54508	0.484671
9.56341	0.471208
9.58175	0.469285
9.60009	0.54814
9.61842	0.455822
9.63676	0.509674
9.6551	0.476978
9.67344	0.505828
9.69177	0.450052
9.71011	0.490441
9.72845	0.438512
9.74678	0.525061
9.76512	0.465438
9.78346	0.478901
9.80179	0.463515
9.82013	0.455822
9.83847	0.469285
9.8568	0.517367
9.87514	0.419279
9.89348	0.453899
9.91182	0.488518
9.93015	0.442359
9.94849	0.446205
9.96683	0.463515
9.98516	0.448129
10.0035	0.482748
10.0218	0.455822
10.0402	0.459668
10.0585	0.465438
10.0768	0.434666
10.0952	0.463515
10.1135	0.465438
10.1319	0.426972
10.1502	0.451975
10.1685	0.428896
10.1869	0.505828
10.2052	0.448129
10.2235	0.478901
10.2419	0.451975
10.2602	0.442359
10.2786	0.459668
10.2969	0.423126
10.3152	0.425049
10.3336	0.467362
10.3519	0.428896
10.3702	0.436589
10.3886	0.440435
10.4069	0.359657
10.4252	0.463515
10.4436	0.463515
10.4619	0.425049
10.4803	0.394276
10.4986	0.421202
10.5169	0.448129
10.5353	0.436589
10.5536	0.438512
10.5719	0.421202
10.5903	0.428896
10.6086	0.39043
10.627	0.405816
10.6453	0.403893
10.6636	0.394276
10.682	0.436589
10.7003	0.421202
10.7186	0.3962
10.737	0.444282
10.7553	0.382736
10.7736	0.467362
10.792	0.421202
10.8103	0.428896
10.8287	0.407739
10.847	0.469285
10.8653	0.382736
10.8837	0.425049
10.902	0.36158
10.9203	0.457745
10.9387	0.448129
10.957	0.428896
10.9754	0.421202
10.9937	0.400046
11.012	0.482748
11.0304	0.438512
11.0487	0.417356
11.067	0.407739
11.0854	0.409663
11.1037	0.423126
11.1221	0.438512
11.1404	0.400046
11.1587	0.419279
11.1771	0.411586
11.1954	0.401969
11.2137	0.382736
11.2321	0.419279
11.2504	0.426972
11.2687	0.426972
11.2871	0.442359
11.3054	0.436589
11.3238	0.39043
11.3421	0.400046
11.3604	0.36158
11.3788	0.428896
11.3971	0.3962
11.4154	0.446205
11.4338	0.417356
11.4521	0.436589
11.4705	0.403893
11.4888	0.411586
11.5071	0.407739
11.5255	0.375043
11.5438	0.36158
11.5621	0.400046
11.5805	0.409663
11.5988	0.413509
11.6171	0.407739
11.6355	0.421202
11.6538	0.400046
11.6722	0.398123
11.6905	0.392353
11.7088	0.415433
11.7272	0.351964
11.7455	0.37312
11.7638	0.380813
11.7822	0.415433
11.8005	0.34427
11.8189	0.407739
11.8372	0.398123
11.8555	0.463515
11.8739	0.37312
11.8922	0.401969
11.9105	0.471208
11.9289	0.436589
11.9472	0.434666
11.9655	0.386583
11.9839	0.419279
12.0022	0.434666
12.0206	0.35581
12.0389	0.425049
12.0572	0.438512
12.0756	0.392353
12.0939	0.421202
12.1122	0.417356
12.1306	0.451975
12.1489	0.440435
12.1673	0.457745
12.1856	0.436589
12.2039	0.451975
12.2223	0.394276
12.2406	0.500058
12.2589	0.340424
12.2773	0.432742
12.2956	0.498134
12.3139	0.490441
12.3323	0.488518
12.3506	0.517367
12.369	0.5366
12.3873	0.457745
12.4056	0.580836
12.424	0.596223
12.4423	0.58276
12.4606	0.686618
12.479	0.7347
12.4973	0.736623
12.5157	0.890487
12.534	0.917414
12.5523	0.953956
12.5707	1.06935
12.589	1.23668
12.6073	1.32708
12.6257	1.56172
12.644	1.7829
12.6624	2.031
12.6807	2.25795
12.699	2.53298
12.7174	2.50414
12.7357	2.35219
12.754	1.99638
12.7724	1.55787
12.7907	1.17706
12.809	0.975113
12.8274	0.686618
12.8457	0.601993
12.8641	0.611609
12.8824	0.523137
12.9007	0.469285
12.9191	0.461592
12.9374	0.394276
12.9557	0.405816
12.9741	0.415433
12.9924	0.413509
13.0108	0.461592
13.0291	0.426972
13.0474	0.419279
13.0658	0.463515
13.0841	0.400046
13.1024	0.371197
13.1208	0.357734
13.1391	0.37889
13.1574	0.401969
13.1758	0.398123
13.1941	0.36735
13.2125	0.371197
13.2308	0.371197
13.2491	0.35581
13.2675	0.325038
13.2858	0.332731
13.3041	0.371197
13.3225	0.363503
13.3408	0.348117
13.3592	0.319268
13.3775	0.37312
13.3958	0.351964
13.4142	0.380813
13.4325	0.359657
13.4508	0.376967
13.4692	0.36735
13.4875	0.346194
13.5058	0.338501
13.5242	0.37889
13.5425	0.305805
13.5609	0.340424
13.5792	0.351964
13.5975	0.338501
13.6159	0.346194
13.6342	0.317344
13.6525	0.321191
13.6709	0.323114
13.6892	0.376967
13.7076	0.353887
13.7259	0.34427
13.7442	0.371197
13.7626	0.336577
13.7809	0.380813
13.7992	0.338501
13.8176	0.363503
13.8359	0.36735
13.8542	0.338501
13.8726	0.332731
13.8909	0.313498
13.9093	0.313498
13.9276	0.346194
13.9459	0.376967
13.9643	0.351964
13.9826	0.340424
14.0009	0.369273
14.0193	0.35581
14.0376	0.38466
14.056	0.328884
14.0743	0.363503
14.0926	0.37312
14.111	0.342347
14.1293	0.405816
14.1476	0.340424
14.166	0.37889
14.1843	0.332731
14.2026	0.369273
14.221	0.423126
14.2393	0.359657
14.2577	0.340424
14.276	0.359657
14.2943	0.348117
14.3127	0.363503
14.331	0.400046
14.3493	0.371197
14.3677	0.35581
14.386	0.380813
14.4044	0.392353
14.4227	0.37312
14.441	0.371197
14.4594	0.39043
14.4777	0.36735
14.496	0.419279
14.5144	0.369273
14.5327	0.407739
14.5511	0.371197
14.5694	0.448129
14.5877	0.380813
14.6061	0.376967
14.6244	0.405816
14.6427	0.423126
14.6611	0.430819
14.6794	0.430819
14.6977	0.448129
14.7161	0.428896
14.7344	0.388506
14.7528	0.371197
14.7711	0.35581
14.7894	0.353887
14.8078	0.386583
14.8261	0.353887
14.8444	0.371197
14.8628	0.348117
14.8811	0.398123
14.8995	0.307728
14.9178	0.35581
14.9361	0.363503
14.9545	0.346194
14.9728	0.332731
14.9911	0.348117
15.0095	0.359657
15.0278	0.325038
15.0461	0.319268
15.0645	0.34427
15.0828	0.39043
15.1012	0.319268
15.1195	0.34427
15.1378	0.348117
15.1562	0.371197
15.1745	0.351964
15.1928	0.357734
15.2112	0.375043
15.2295	0.359657
15.2479	0.332731
15.2662	0.323114
15.2845	0.340424
15.3029	0.363503
15.3212	0.363503
15.3395	0.342347
15.3579	0.34427
15.3762	0.332731
15.3945	0.38466
15.4129	0.348117
15.4312	0.392353
15.4496	0.35004
15.4679	0.409663
15.4862	0.338501
15.5046	0.386583
15.5229	0.375043
15.5412	0.348117
15.5596	0.36735
15.5779	0.407739
15.5963	0.375043
15.6146	0.37889
15.6329	0.330807
15.6513	0.38466
15.6696	0.394276
15.6879	0.386583
15.7063	0.403893
15.7246	0.488518
15.7429	0.509674
15.7613	0.57122
15.7796	0.463515
15.798	0.525061
15.8163	0.546217
15.8346	0.609686
15.853	0.628919
15.8713	0.651998
15.8896	0.663538
15.908	0.655845
15.9263	0.730854
15.9447	0.709697
15.963	0.686618
15.9813	0.621226
15.9997	0.630842
16.018	0.590453
16.0363	0.544294
16.0547	0.538524
16.073	0.521214
16.0914	0.515444
16.1097	0.476978
16.128	0.453899
16.1464	0.455822
16.1647	0.401969
16.183	0.36735
16.2014	0.34427
16.2197	0.365427
16.238	0.39043
16.2564	0.365427
16.2747	0.39043
16.2931	0.338501
16.3114	0.326961
16.3297	0.348117
16.3481	0.36735
16.3664	0.37312
16.3847	0.348117
16.4031	0.36735
16.4214	0.330807
16.4398	0.365427
16.4581	0.315421
16.4764	0.328884
16.4948	0.392353
16.5131	0.357734
16.5314	0.36735
16.5498	0.382736
16.5681	0.321191
16.5864	0.36735
16.6048	0.35581
16.6231	0.359657
16.6415	0.363503
16.6598	0.338501
16.6781	0.315421
16.6965	0.37312
16.7148	0.375043
16.7331	0.35581
16.7515	0.37312
16.7698	0.369273
16.7882	0.330807
16.8065	0.346194
16.8248	0.36158
16.8432	0.365427
16.8615	0.36158
16.8798	0.392353
16.8982	0.319268
16.9165	0.37312
16.9348	0.398123
16.9532	0.338501
16.9715	0.369273
16.9899	0.371197
17.0082	0.35581
17.0265	0.336577
17.0449	0.35581
17.0632	0.325038
17.0815	0.369273
17.0999	0.392353
17.1182	0.376967
17.1366	0.392353
17.1549	0.338501
17.1732	0.442359
17.1916	0.419279
17.2099	0.346194
17.2282	0.413509
17.2466	0.417356
17.2649	0.401969
17.2832	0.421202
17.3016	0.425049
17.3199	0.428896
17.3383	0.471208
17.3566	0.461592
17.3749	0.448129
17.3933	0.498134
17.4116	0.500058
17.4299	0.461592
17.4483	0.55968
17.4666	0.555833
17.485	0.625072
17.5033	0.642382
17.5216	0.642382
17.54	0.71739
17.5583	0.690464
17.5766	0.677001
17.595	0.640459
17.6133	0.688541
17.6316	0.644305
17.65	0.607762
17.6683	0.53083
17.6867	0.490441
17.705	0.526984
17.7233	0.505828
17.7417	0.448129
17.76	0.480825
17.7783	0.478901
17.7967	0.446205
17.815	0.436589
17.8334	0.492365
17.8517	0.415433
17.87	0.465438
17.8884	0.38466
17.9067	0.423126
17.925	0.478901
17.9434	0.459668
17.9617	0.475055
17.9801	0.430819
17.9984	0.540447
18.0167	0.428896
18.0351	0.450052
18.0534	0.480825
18.0717	0.425049
18.0901	0.484671
18.1084	0.523137
18.1267	0.459668
18.1451	0.440435
18.1634	0.496211
18.1818	0.486595
18.2001	0.440435
18.2184	0.434666
18.2368	0.436589
18.2551	0.436589
18.2734	0.430819
18.2918	0.411586
18.3101	0.440435
18.3285	0.428896
18.3468	0.434666
18.3651	0.451975
18.3835	0.476978
18.4018	0.509674
18.4201	0.442359
18.4385	0.413509
18.4568	0.428896
18.4751	0.465438
18.4935	0.403893
18.5118	0.3962
18.5302	0.407739
18.5485	0.475055
18.5668	0.438512
18.5852	0.421202
18.6035	0.484671
18.6218	0.444282
18.6402	0.515444
18.6585	0.463515
18.6769	0.478901
18.6952	0.415433
18.7135	0.436589
18.7319	0.476978
18.7502	0.446205
18.7685	0.488518
18.7869	0.480825
18.8052	0.471208
18.8235	0.486595
18.8419	0.438512
18.8602	0.450052
18.8786	0.475055
18.8969	0.511597
18.9152	0.492365
18.9336	0.5366
18.9519	0.521214
18.9702	0.538524
18.9886	0.546217
19.0069	0.605839
19.0253	0.584683
19.0436	0.638535
19.0619	0.617379
19.0803	0.694311
19.0986	0.744317
19.1169	0.755856
19.1353	0.767396
19.1536	0.911644
19.1719	0.905874
19.1903	0.93857
19.2086	1.02512
19.227	1.10205
19.2453	1.27515
19.2636	1.41747
19.282	1.54441
19.3003	1.97523
19.3186	2.12332
19.337	2.62915
19.3553	3.0292
19.3737	3.76005
19.392	4.45244
19.4103	5.47948
19.4287	6.31419
19.447	7.1816
19.4653	7.64896
19.4837	7.92399
19.502	7.4874
19.5204	6.51037
19.5387	5.54295
19.557	4.47167
19.5754	3.44847
19.5937	2.72724
19.612	2.18487
19.6304	1.78482
19.6487	1.62134
19.667	1.36747
19.6854	1.14052
19.7037	1.03666
19.7221	0.880871
19.7404	0.882794
19.7587	0.782783
19.7771	0.736623
19.7954	0.675078
19.8137	0.682771
19.8321	0.650075
19.8504	0.663538
19.8688	0.592376
19.8871	0.590453
19.9054	0.557757
19.9238	0.590453
19.9421	0.56545
19.9604	0.54237
19.9788	0.540447
19.9971	0.55968
20.0154	0.54814
20.0338	0.528907
20.0521	0.509674
20.0705	0.563527
20.0888	0.550063
20.1071	0.551987
20.1255	0.538524
20.1438	0.517367
20.1621	0.519291
20.1805	0.432742
20.1988	0.509674
20.2172	0.517367
20.2355	0.500058
20.2538	0.426972
20.2722	0.488518
20.2905	0.498134
20.3088	0.478901
20.3272	0.476978
20.3455	0.461592
20.3638	0.492365
20.3822	0.5366
20.4005	0.492365
20.4189	0.484671
20.4372	0.525061
20.4555	0.540447
20.4739	0.461592
20.4922	0.507751
20.5105	0.5366
20.5289	0.494288
20.5472	0.5366
20.5656	0.484671
20.5839	0.54814
20.6022	0.509674
20.6206	0.55968
20.6389	0.523137
20.6572	0.534677
20.6756	0.525061
20.6939	0.557757
20.7122	0.534677
20.7306	0.605839
20.7489	0.590453
20.7673	0.569296
20.7856	0.54814
20.8039	0.590453
20.8223	0.594299
20.8406	0.646228
20.8589	0.551987
20.8773	0.611609
20.8956	0.55391
20.914	0.598146
20.9323	0.609686
20.9506	0.592376
20.969	0.625072
20.9873	0.575066
21.0056	0.561603
21.024	0.600069
21.0423	0.575066
21.0607	0.498134
21.079	0.534677
21.0973	0.569296
21.1157	0.54237
21.134	0.550063
21.1523	0.53083
21.1707	0.513521
21.189	0.511597
21.2073	0.551987
21.2257	0.55968
21.244	0.575066
21.2624	0.603916
21.2807	0.594299
21.299	0.601993
21.3174	0.611609
21.3357	0.657768
21.354	0.615456
21.3724	0.623149
21.3907	0.75778
21.4091	0.692388
21.4274	0.750087
21.4457	0.859715
21.4641	0.825095
21.4824	0.936647
21.5007	1.01358
21.5191	1.13859
21.5374	1.11167
21.5557	1.25207
21.5741	1.30784
21.5924	1.51171
21.6108	1.78867
21.6291	1.9483
21.6474	2.12332
21.6658	2.3195
21.6841	2.57337
21.7024	2.81763
21.7208	3.05805
21.7391	2.89841
21.7575	3.03497
21.7758	2.83302
21.7941	2.53683
21.8125	2.32719
21.8308	2.08293
21.8491	1.98869
21.8675	1.72135
21.8858	1.62711
21.9041	1.35785
21.9225	1.30207
21.9408	1.20014
21.9592	1.14436
21.9775	1.20014
21.9958	1.17706
22.0142	1.13475
22.0325	1.1636
22.0508	1.14244
22.0692	1.33092
22.0875	1.27322
22.1059	1.4367
22.1242	1.47132
22.1425	1.43093
22.1609	1.23283
22.1792	1.29246
22.1975	1.1636
22.2159	1.09243
22.2342	0.984729
22.2525	0.986652
22.2709	0.898181
22.2892	0.886641
22.3076	0.878948
22.3259	0.777013
22.3442	0.755856
22.3626	0.677001
22.3809	0.71739
22.3992	0.646228
22.4176	0.550063
22.4359	0.557757
22.4543	0.550063
22.4726	0.515444
22.4909	0.501981
22.5093	0.501981
22.5276	0.517367
22.5459	0.503904
22.5643	0.480825
22.5826	0.455822
22.6009	0.473132
22.6193	0.525061
22.6376	0.482748
22.656	0.459668
22.6743	0.505828
22.6926	0.501981
22.711	0.500058
22.7293	0.425049
22.7476	0.490441
22.766	0.492365
22.7843	0.421202
22.8027	0.513521
22.821	0.409663
22.8393	0.436589
22.8577	0.426972
22.876	0.448129
22.8943	0.451975
22.9127	0.411586
22.931	0.444282
22.9494	0.425049
22.9677	0.476978
22.986	0.457745
23.0044	0.534677
23.0227	0.471208
23.041	0.440435
23.0594	0.409663
23.0777	0.475055
23.096	0.411586
23.1144	0.503904
23.1327	0.417356
23.1511	0.488518
23.1694	0.475055
23.1877	0.426972
23.2061	0.494288
23.2244	0.400046
23.2427	0.503904
23.2611	0.501981
23.2794	0.488518
23.2978	0.457745
23.3161	0.448129
23.3344	0.55968
23.3528	0.484671
23.3711	0.486595
23.3894	0.551987
23.4078	0.450052
23.4261	0.507751
23.4444	0.500058
23.4628	0.444282
23.4811	0.480825
23.4995	0.480825
23.5178	0.440435
23.5361	0.448129
23.5545	0.423126
23.5728	0.450052
23.5911	0.37889
23.6095	0.436589
23.6278	0.434666
23.6462	0.421202
23.6645	0.448129
23.6828	0.421202
23.7012	0.459668
23.7195	0.486595
23.7378	0.425049
23.7562	0.461592
23.7745	0.509674
23.7928	0.426972
23.8112	0.423126
23.8295	0.459668
23.8479	0.526984
23.8662	0.459668
23.8845	0.511597
23.9029	0.53083
23.9212	0.546217
23.9395	0.586606
23.9579	0.588529
23.9762	0.673155
23.9946	0.727007
24.0129	0.713544
24.0312	0.72893
24.0496	0.852021
24.0679	0.982806
24.0862	0.961649
24.1046	1.05012
24.1229	1.05397
24.1412	1.20783
24.1596	1.05974
24.1779	1.08666
24.1963	1.0155
24.2146	0.948186
24.2329	0.91549
24.2513	0.800092
24.2696	0.786629
24.2879	0.805862
24.3063	0.730854
24.3246	0.682771
24.343	0.657768
24.3613	0.594299
24.3796	0.575066
24.398	0.628919
24.4163	0.598146
24.4346	0.592376
24.453	0.600069
24.4713	0.628919
24.4897	0.534677
24.508	0.555833
24.5263	0.573143
24.5447	0.532754
24.563	0.592376
24.5813	0.598146
24.5997	0.594299
24.618	0.607762
24.6363	0.526984
24.6547	0.519291
24.673	0.56545
24.6914	0.526984
24.7097	0.455822
24.728	0.426972
24.7464	0.494288
24.7647	0.446205
24.783	0.415433
24.8014	0.419279
24.8197	0.417356
24.8381	0.392353
24.8564	0.423126
24.8747	0.357734
24.8931	0.365427
24.9114	0.432742
24.9297	0.375043
24.9481	0.444282
24.9664	0.394276
24.9847	0.438512
25.0031	0.346194
25.0214	0.342347
25.0398	0.38466
25.0581	0.423126
25.0764	0.35581
25.0948	0.388506
25.1131	0.39043
25.1314	0.35004
25.1498	0.371197
25.1681	0.348117
25.1865	0.359657
25.2048	0.37312
25.2231	0.346194
25.2415	0.36158
25.2598	0.353887
25.2781	0.317344
25.2965	0.365427
25.3148	0.336577
25.3331	0.37312
25.3515	0.365427
25.3698	0.386583
25.3882	0.328884
25.4065	0.382736
25.4248	0.371197
25.4432	0.3962
25.4615	0.394276
25.4798	0.38466
25.4982	0.386583
25.5165	0.446205
25.5349	0.432742
25.5532	0.469285
25.5715	0.440435
25.5899	0.446205
25.6082	0.550063
25.6265	0.492365
25.6449	0.532754
25.6632	0.469285
25.6815	0.544294
25.6999	0.450052
25.7182	0.425049
25.7366	0.507751
25.7549	0.476978
25.7732	0.426972
25.7916	0.419279
25.8099	0.451975
25.8282	0.461592
25.8466	0.403893
25.8649	0.423126
25.8833	0.409663
25.9016	0.357734
25.9199	0.348117
25.9383	0.351964
25.9566	0.353887
25.9749	0.353887
25.9933	0.342347
26.0116	0.392353
26.0299	0.301958
26.0483	0.36158
26.0666	0.328884
26.085	0.303881
26.1033	0.35581
26.1216	0.342347
26.14	0.35004
26.1583	0.269262
26.1766	0.323114
26.195	0.338501
26.2133	0.321191
26.2317	0.348117
26.25	0.376967
26.2683	0.317344
26.2867	0.325038
26.305	0.309651
26.3233	0.325038
26.3417	0.371197
26.36	0.330807
26.3784	0.380813
26.3967	0.34427
26.415	0.35581
26.4334	0.35581
26.4517	0.3962
26.47	0.386583
26.4884	0.325038
26.5067	0.400046
26.525	0.403893
26.5434	0.38466
26.5617	0.417356
26.5801	0.444282
26.5984	0.482748
26.6167	0.5366
26.6351	0.523137
26.6534	0.526984
26.6717	0.54237
26.6901	0.561603
26.7084	0.505828
26.7268	0.544294
26.7451	0.521214
26.7634	0.501981
26.7818	0.482748
26.8001	0.438512
26.8184	0.436589
26.8368	0.484671
26.8551	0.421202
26.8734	0.363503
26.8918	0.480825
26.9101	0.419279
26.9285	0.382736
26.9468	0.35004
26.9651	0.434666
26.9835	0.436589
27.0018	0.375043
27.0201	0.394276
27.0385	0.400046
27.0568	0.386583
27.0752	0.438512
27.0935	0.444282
27.1118	0.444282
27.1302	0.432742
27.1485	0.478901
27.1668	0.503904
27.1852	0.573143
27.2035	0.563527
27.2218	0.588529
27.2402	0.667385
27.2585	0.727007
27.2769	0.715467
27.2952	0.857791
27.3135	0.884717
27.3319	0.946263
27.3502	1.07128
27.3685	0.988576
27.3869	1.00204
27.4052	1.05012
27.4236	0.980882
27.4419	0.93857
27.4602	0.917414
27.4786	0.836635
27.4969	0.800092
27.5152	0.75778
27.5336	0.692388
27.5519	0.646228
27.5702	0.613532
27.5886	0.586606
27.6069	0.500058
27.6253	0.523137
27.6436	0.480825
27.6619	0.486595
27.6803	0.446205
27.6986	0.425049
27.7169	0.465438
27.7353	0.401969
27.7536	0.388506
27.772	0.475055
27.7903	0.398123
27.8086	0.409663
27.827	0.375043
27.8453	0.392353
27.8636	0.365427
27.882	0.407739
27.9003	0.380813
27.9187	0.334654
27.937	0.36735
27.9553	0.392353
27.9737	0.37889
27.992	0.36735
28.0103	0.315421
28.0287	0.369273
28.047	0.401969
28.0653	0.375043
28.0837	0.434666
28.102	0.37312
28.1204	0.394276
28.1387	0.469285
28.157	0.461592
28.1754	0.515444
28.1937	0.498134
28.212	0.563527
28.2304	0.575066
28.2487	0.71739
28.2671	0.75201
28.2854	0.809709
28.3037	0.863561
28.3221	0.952033
28.3404	0.975113
28.3587	1.07705
28.3771	1.03281
28.3954	0.92126
28.4137	1.09243
28.4321	0.973189
28.4504	0.92126
28.4688	0.846251
28.4871	0.76355
28.5054	0.678924
28.5238	0.650075
28.5421	0.586606
28.5604	0.451975
28.5788	0.517367
28.5971	0.513521
28.6155	0.430819
28.6338	0.409663
28.6521	0.434666
28.6705	0.444282
28.6888	0.388506
28.7071	0.467362
28.7255	0.375043
28.7438	0.340424
28.7621	0.346194
28.7805	0.375043
28.7988	0.346194
28.8172	0.365427
28.8355	0.275032
28.8538	0.340424
28.8722	0.34427
28.8905	0.332731
28.9088	0.292341
28.9272	0.269262
28.9455	0.307728
28.9639	0.288495
28.9822	0.317344
29.0005	0.244259
29.0189	0.278878
29.0372	0.282725
29.0555	0.290418
29.0739	0.290418
29.0922	0.257722
29.1105	0.234642
29.1289	0.271185
29.1472	0.284648
29.1656	0.271185
29.1839	0.292341
29.2022	0.271185
29.2206	0.269262
29.2389	0.253875
29.2572	0.34427
29.2756	0.265415
29.2939	0.300035
29.3123	0.305805
29.3306	0.276955
29.3489	0.275032
29.3673	0.323114
29.3856	0.296188
29.4039	0.311574
29.4223	0.280802
29.4406	0.292341
29.459	0.342347
29.4773	0.309651
29.4956	0.276955
29.514	0.35004
29.5323	0.326961
29.5506	0.294265
29.569	0.313498
29.5873	0.325038
29.6056	0.288495
29.624	0.311574
29.6423	0.323114
29.6607	0.288495
29.679	0.351964
29.6973	0.292341
29.7157	0.282725
29.734	0.282725
29.7523	0.348117
29.7707	0.319268
29.789	0.284648
29.8074	0.307728
29.8257	0.280802
29.844	0.288495
29.8624	0.284648
29.8807	0.288495
29.899	0.278878
29.9174	0.255799
29.9357	0.240412
29.954	0.240412
29.9724	0.248106
29.9907	0.284648
30.0091	0.280802
30.0274	0.207716
30.0457	0.238489
30.0641	0.280802
30.0824	0.290418
30.1007	0.219256
30.1191	0.228873
30.1374	0.248106
30.1558	0.244259
30.1741	0.225026
30.1924	0.201946
30.2108	0.215409
30.2291	0.246182
30.2474	0.240412
30.2658	0.211563
30.2841	0.251952
30.3024	0.225026
30.3208	0.225026
30.3391	0.248106
30.3575	0.250029
30.3758	0.20964
30.3941	0.234642
30.4125	0.217333
30.4308	0.251952
30.4491	0.207716
30.4675	0.20964
30.4858	0.205793
30.5042	0.205793
30.5225	0.265415
30.5408	0.225026
30.5592	0.250029
30.5775	0.267339
30.5958	0.236566
30.6142	0.271185
30.6325	0.226949
30.6508	0.278878
30.6692	0.290418
30.6875	0.284648
30.7059	0.244259
30.7242	0.267339
30.7425	0.240412
30.7609	0.278878
30.7792	0.278878
30.7975	0.259645
30.8159	0.282725
30.8342	0.20964
30.8526	0.213486
30.8709	0.282725
30.8892	0.215409
30.9076	0.300035
30.9259	0.286572
30.9442	0.248106
30.9626	0.280802
30.9809	0.271185
30.9992	0.284648
31.0176	0.303881
31.0359	0.282725
31.0543	0.300035
31.0726	0.275032
31.0909	0.311574
31.1093	0.309651
31.1276	0.342347
31.1459	0.363503
31.1643	0.338501
31.1826	0.39043
31.201	0.440435
31.2193	0.426972
31.2376	0.38466
31.256	0.380813
31.2743	0.375043
31.2926	0.305805
31.311	0.342347
31.3293	0.342347
31.3477	0.301958
31.366	0.338501
31.3843	0.328884
31.4027	0.35004
31.421	0.317344
31.4393	0.286572
31.4577	0.330807
31.476	0.37312
31.4943	0.328884
31.5127	0.371197
31.531	0.328884
31.5494	0.319268
31.5677	0.309651
31.586	0.280802
31.6044	0.292341
31.6227	0.269262
31.641	0.278878
31.6594	0.280802
31.6777	0.271185
31.6961	0.255799
31.7144	0.242336
31.7327	0.255799
31.7511	0.263492
31.7694	0.194253
31.7877	0.234642
31.8061	0.269262
31.8244	0.244259
31.8427	0.221179
31.8611	0.211563
31.8794	0.250029
31.8978	0.225026
31.9161	0.194253
31.9344	0.225026
31.9528	0.211563
31.9711	0.228873
31.9894	0.236566
32.0078	0.213486
32.0261	0.244259
32.0445	0.226949
32.0628	0.246182
32.0811	0.238489
32.0995	0.223103
32.1178	0.301958
32.1361	0.251952
32.1545	0.234642
32.1728	0.240412
32.1911	0.228873
32.2095	0.217333
32.2278	0.240412
32.2462	0.244259
32.2645	0.251952
32.2828	0.271185
32.3012	0.248106
32.3195	0.280802
32.3378	0.303881
32.3562	0.311574
32.3745	0.259645
32.3929	0.213486
32.4112	0.286572
32.4295	0.303881
32.4479	0.261569
32.4662	0.301958
32.4845	0.246182
32.5029	0.219256
32.5212	0.269262
32.5395	0.255799
32.5579	0.242336
32.5762	0.205793
32.5946	0.221179
32.6129	0.248106
32.6312	0.261569
32.6496	0.251952
32.6679	0.244259
32.6862	0.265415
32.7046	0.251952
32.7229	0.265415
32.7413	0.269262
32.7596	0.292341
32.7779	0.250029
32.7963	0.259645
32.8146	0.238489
32.8329	0.230796
32.8513	0.269262
32.8696	0.261569
32.888	0.261569
32.9063	0.207716
32.9246	0.251952
32.943	0.230796
32.9613	0.265415
32.9796	0.228873
32.998	0.232719
33.0163	0.263492
33.0346	0.217333
33.053	0.246182
33.0713	0.244259
33.0897	0.234642
33.108	0.194253
33.1263	0.236566
33.1447	0.18079
33.163	0.234642
33.1813	0.221179
33.1997	0.221179
33.218	0.248106
33.2364	0.207716
33.2547	0.240412
33.273	0.215409
33.2914	0.230796
33.3097	0.248106
33.328	0.230796
33.3464	0.238489
33.3647	0.265415
33.383	0.250029
33.4014	0.223103
33.4197	0.215409
33.4381	0.232719
33.4564	0.250029
33.4747	0.232719
33.4931	0.250029
33.5114	0.271185
33.5297	0.246182
33.5481	0.271185
33.5664	0.250029
33.5848	0.294265
33.6031	0.267339
33.6214	0.309651
33.6398	0.36158
33.6581	0.371197
33.6764	0.376967
33.6948	0.434666
33.7131	0.421202
33.7314	0.496211
33.7498	0.498134
33.7681	0.563527
33.7865	0.53083
33.8048	0.607762
33.8231	0.590453
33.8415	0.569296
33.8598	0.611609
33.8781	0.501981
33.8965	0.586606
33.9148	0.534677
33.9332	0.476978
33.9515	0.444282
33.9698	0.342347
33.9882	0.386583
34.0065	0.388506
34.0248	0.330807
34.0432	0.313498
34.0615	0.311574
34.0798	0.326961
34.0982	0.309651
34.1165	0.267339
34.1349	0.257722
34.1532	0.225026
34.1715	0.236566
34.1899	0.244259
34.2082	0.255799
34.2265	0.271185
34.2449	0.246182
34.2632	0.261569
34.2816	0.225026
34.2999	0.221179
34.3182	0.228873
34.3366	0.211563
34.3549	0.217333
34.3732	0.236566
34.3916	0.234642
34.4099	0.240412
34.4282	0.196176
34.4466	0.234642
34.4649	0.225026
34.4833	0.182713
34.5016	0.211563
34.5199	0.200023
34.5383	0.213486
34.5566	0.246182
34.5749	0.196176
34.5933	0.223103
34.6116	0.182713
34.63	0.18656
34.6483	0.200023
34.6666	0.217333
34.685	0.194253
34.7033	0.226949
34.7216	0.184637
34.74	0.226949
34.7583	0.230796
34.7767	0.217333
34.795	0.226949
34.8133	0.226949
34.8317	0.188483
34.85	0.20387
34.8683	0.232719
34.8867	0.215409
34.905	0.221179
34.9233	0.219256
34.9417	0.196176
34.96	0.230796
34.9784	0.20964
34.9967	0.20387
35.015	0.196176
35.0334	0.219256
35.0517	0.213486
35.07	0.240412
35.0884	0.223103
35.1067	0.219256
35.1251	0.201946
35.1434	0.246182
35.1617	0.226949
35.1801	0.1981
35.1984	0.276955
35.2167	0.292341
35.2351	0.236566
35.2534	0.257722
35.2717	0.265415
35.2901	0.276955
35.3084	0.248106
35.3268	0.323114
35.3451	0.313498
35.3634	0.353887
35.3818	0.328884
35.4001	0.375043
35.4184	0.3962
35.4368	0.434666
35.4551	0.451975
35.4735	0.394276
35.4918	0.36735
35.5101	0.419279
35.5285	0.39043
35.5468	0.400046
35.5651	0.348117
35.5835	0.401969
35.6018	0.332731
35.6201	0.315421
35.6385	0.35004
35.6568	0.257722
35.6752	0.313498
35.6935	0.217333
35.7118	0.271185
35.7302	0.273108
35.7485	0.263492
35.7668	0.251952
35.7852	0.225026
35.8035	0.271185
35.8219	0.211563
35.8402	0.225026
35.8585	0.223103
35.8769	0.246182
35.8952	0.238489
35.9135	0.20964
35.9319	0.242336
35.9502	0.226949
35.9685	0.200023
35.9869	0.196176
36.0052	0.201946
36.0236	0.20964
36.0419	0.190407
36.0602	0.196176
36.0786	0.230796
36.0969	0.228873
36.1152	0.18079
36.1336	0.194253
36.1519	0.215409
36.1703	0.205793
36.1886	0.211563
36.2069	0.196176
36.2253	0.184637
36.2436	0.18656
36.2619	0.1981
36.2803	0.18656
36.2986	0.207716
36.317	0.20964
36.3353	0.215409
36.3536	0.207716
36.372	0.188483
36.3903	0.184637
36.4086	0.215409
36.427	0.20964
36.4453	0.232719
36.4636	0.1981
36.482	0.1981
36.5003	0.207716
36.5187	0.217333
36.537	0.211563
36.5553	0.240412
36.5737	0.236566
36.592	0.234642
36.6103	0.207716
36.6287	0.253875
36.647	0.269262
36.6654	0.201946
36.6837	0.18656
36.702	0.18656
36.7204	0.234642
36.7387	0.232719
36.757	0.194253
36.7754	0.188483
36.7937	0.207716
36.812	0.219256
36.8304	0.17502
36.8487	0.230796
36.8671	0.19233
36.8854	0.184637
36.9037	0.20387
36.9221	0.184637
36.9404	0.18079
36.9587	0.176943
36.9771	0.1981
36.9954	0.153864
37.0138	0.207716
37.0321	0.194253
37.0504	0.19233
37.0688	0.173097
37.0871	0.211563
37.1054	0.188483
37.1238	0.201946
37.1421	0.159634
37.1604	0.167327
37.1788	0.205793
37.1971	0.19233
37.2155	0.200023
37.2338	0.211563
37.2521	0.1981
37.2705	0.200023
37.2888	0.196176
37.3071	0.194253
37.3255	0.196176
37.3438	0.207716
37.3622	0.17502
37.3805	0.230796
37.3988	0.18079
37.4172	0.200023
37.4355	0.19233
37.4538	0.194253
37.4722	0.159634
37.4905	0.223103
37.5088	0.205793
37.5272	0.140401
37.5455	0.190407
37.5639	0.161557
37.5822	0.201946
37.6005	0.188483
37.6189	0.215409
37.6372	0.173097
37.6555	0.221179
37.6739	0.188483
37.6922	0.20387
37.7106	0.18079
37.7289	0.240412
37.7472	0.20387
37.7656	0.176943
37.7839	0.182713
37.8022	0.20964
37.8206	0.178867
37.8389	0.176943
37.8573	0.230796
37.8756	0.205793
37.8939	0.20964
37.9123	0.188483
37.9306	0.17502
37.9489	0.159634
37.9673	0.20387
37.9856	0.182713
38.0039	0.18079
38.0223	0.18079
38.0406	0.219256
38.059	0.1981
38.0773	0.194253
38.0956	0.17502
38.114	0.240412
38.1323	0.18656
38.1506	0.205793
38.169	0.230796
38.1873	0.215409
38.2057	0.19233
38.224	0.20387
38.2423	0.18079
38.2607	0.225026
38.279	0.196176
38.2973	0.176943
38.3157	0.200023
38.334	0.194253
38.3523	0.190407
38.3707	0.18079
38.389	0.178867
38.4074	0.17502
38.4257	0.182713
38.444	0.1981
38.4624	0.1981
38.4807	0.194253
38.499	0.17502
38.5174	0.205793
38.5357	0.20387
38.5541	0.194253
38.5724	0.221179
38.5907	0.215409
38.6091	0.196176
38.6274	0.20964
38.6457	0.219256
38.6641	0.188483
38.6824	0.221179
38.7007	0.207716
38.7191	0.246182
38.7374	0.265415
38.7558	0.217333
38.7741	0.253875
38.7924	0.213486
38.8108	0.242336
38.8291	0.217333
38.8474	0.271185
38.8658	0.248106
38.8841	0.230796
38.9025	0.242336
38.9208	0.250029
38.9391	0.257722
38.9575	0.232719
38.9758	0.230796
38.9941	0.20387
39.0125	0.211563
39.0308	0.207716
39.0491	0.219256
39.0675	0.217333
39.0858	0.19233
39.1042	0.226949
39.1225	0.228873
39.1408	0.205793
39.1592	0.269262
39.1775	0.215409
39.1958	0.18079
39.2142	0.178867
39.2325	0.18656
39.2509	0.238489
39.2692	0.176943
39.2875	0.257722
39.3059	0.226949
39.3242	0.292341
39.3425	0.215409
39.3609	0.244259
39.3792	0.230796
39.3975	0.223103
39.4159	0.225026
39.4342	0.294265
39.4526	0.232719
39.4709	0.300035
39.4892	0.228873
39.5076	0.278878
39.5259	0.325038
39.5442	0.300035
39.5626	0.325038
39.5809	0.300035
39.5993	0.325038
39.6176	0.294265
39.6359	0.290418
39.6543	0.265415
39.6726	0.261569
39.6909	0.255799
39.7093	0.275032
39.7276	0.232719
39.746	0.232719
39.7643	0.211563
39.7826	0.205793
39.801	0.223103
39.8193	0.221179
39.8376	0.253875
39.856	0.228873
39.8743	0.244259
39.8926	0.248106
39.911	0.228873
39.9293	0.200023
39.9477	0.253875
39.966	0.219256
39.9843	0.246182
40.0027	0.238489
40.021	0.248106
40.0393	0.257722
40.0577	0.238489
40.076	0.234642
40.0944	0.261569
40.1127	0.265415
40.131	0.228873
40.1494	0.226949
40.1677	0.278878
40.186	0.211563
40.2044	0.225026
40.2227	0.194253
40.241	0.228873
40.2594	0.211563
40.2777	0.226949
40.2961	0.261569
40.3144	0.250029
40.3327	0.18656
40.3511	0.205793
40.3694	0.250029
40.3877	0.167327
40.4061	0.238489
40.4244	0.248106
40.4428	0.215409
40.4611	0.217333
40.4794	0.201946
40.4978	0.269262
40.5161	0.251952
40.5344	0.194253
[truncated: 1,056 more rows]

## Sheet: Cooling 135 °C
2theta	Intensity
3.89731	1.34246
3.91565	1.45594
3.93399	1.37324
3.95232	1.48863
3.97066	1.45978
3.989	1.47132
4.00733	1.4117
4.02567	1.42901
4.04401	1.39247
4.06234	1.36747
4.08068	1.3867
4.09902	1.31361
4.11735	1.35785
4.13569	1.34246
4.15403	1.2963
4.17237	1.3867
4.1907	1.28476
4.20904	1.36747
4.22738	1.2463
4.24571	1.40785
4.26405	1.24822
4.28239	1.30207
4.30072	1.30592
4.31906	1.26361
4.3374	1.30977
4.35573	1.31554
4.37407	1.28092
4.39241	1.3617
4.41075	1.25399
4.42908	1.30015
4.44742	1.26938
4.46576	1.31554
4.48409	1.29053
4.50243	1.4117
4.52077	1.31169
4.5391	1.25976
4.55744	1.21937
4.57578	1.2463
4.59411	1.2713
4.61245	1.24437
4.63079	1.27515
4.64913	1.22322
4.66746	1.20783
4.6858	1.17898
4.70414	1.26745
4.72247	1.22899
4.74081	1.22899
4.75915	1.20975
4.77748	1.21552
4.79582	1.17129
4.81416	1.22322
4.83249	1.19629
4.85083	1.19822
4.86917	1.20206
4.8875	1.26361
4.90584	1.19245
4.92418	1.26553
4.94252	1.08666
4.96085	1.14052
4.97919	1.15013
4.99753	1.14629
5.01586	1.18283
5.0342	1.18475
5.05254	1.08282
5.07087	1.08089
5.08921	1.16552
5.10755	1.14629
5.12588	1.22322
5.14422	1.18668
5.16256	1.21745
5.1809	1.17898
5.19923	1.10974
5.21757	1.11167
5.23591	1.13282
5.25424	1.14052
5.27258	1.0732
5.29092	1.09243
5.30925	1.07512
5.32759	1.2386
5.34593	1.09243
5.36426	1.18283
5.3826	1.03666
5.40094	1.06551
5.41927	1.10205
5.43761	1.14244
5.45595	1.0732
5.47429	1.20014
5.49262	1.1059
5.51096	1.10974
5.5293	1.12898
5.54763	1.11936
5.56597	1.03858
5.58431	1.10782
5.60264	1.13282
5.62098	1.08089
5.63932	1.12898
5.65765	1.24053
5.67599	1.1886
5.69433	1.21168
5.71267	1.13475
5.731	1.09051
5.74934	1.1886
5.76768	1.20783
5.78601	1.15398
5.80435	1.08282
5.82269	1.20591
5.84102	1.20206
5.85936	1.24053
5.8777	1.24437
5.89603	1.26168
5.91437	1.19052
5.93271	1.28092
5.95104	1.20975
5.96938	1.24437
5.98772	1.21745
6.00606	1.35785
6.02439	1.24437
6.04273	1.32515
6.06107	1.32708
6.0794	1.28092
6.09774	1.4444
6.11608	1.38478
6.13441	1.54249
6.15275	1.53672
6.17109	1.59634
6.18942	1.56172
6.20776	1.51556
6.2261	1.63673
6.24444	1.60403
6.26277	1.63673
6.28111	1.65788
6.29945	1.93292
6.31778	1.96946
6.33612	1.7829
6.35446	1.9733
6.37279	1.95792
6.39113	2.16179
6.40947	2.25795
6.4278	2.29065
6.44614	2.40989
6.46448	2.52144
6.48282	2.60415
6.50115	2.80994
6.51949	2.98496
6.53783	3.01381
6.55616	3.26576
6.5745	3.4177
6.59284	3.8389
6.61117	3.70427
6.62951	4.17164
6.64785	4.43705
6.66618	4.69862
6.68452	4.8621
6.70286	5.08136
6.72119	5.37947
6.73953	5.82183
6.75787	6.4392
6.77621	6.66423
6.79454	7.28738
6.81288	7.88553
6.83122	8.38751
6.84955	9.12028
6.86789	9.78959
6.88623	10.6455
6.90456	11.6052
6.9229	12.5611
6.94124	14.0266
6.95957	15.0671
6.97791	16.6904
6.99625	18.2175
7.01459	20.1235
7.03292	21.966
7.05126	23.9028
7.0696	26.6588
7.08793	28.836
7.10627	31.5306
7.12461	35.1771
7.14294	39.1564
7.16128	43.7262
7.17962	48.8191
7.19795	54.8448
7.21629	62.8649
7.23463	72.6257
7.25296	84.1905
7.2713	97.1766
7.28964	111.163
7.30798	124.862
7.32631	138.829
7.34465	145.18
7.36299	137.849
7.38132	119.221
7.39966	95.1879
7.418	72.1833
7.43633	51.4771
7.45467	36.0715
7.47301	25.9299
7.49134	20.3043
7.50968	16.0557
7.52802	12.1514
7.54636	8.90295
7.56469	6.42766
7.58303	4.78517
7.60137	3.77736
7.6197	3.21768
7.63804	2.90033
7.65638	2.51375
7.67471	2.2868
7.69305	2.16179
7.71139	2.05024
7.72972	1.87522
7.74806	1.68289
7.7664	1.64634
7.78473	1.59634
7.80307	1.42516
7.82141	1.50787
7.83975	1.32323
7.85808	1.32515
7.87642	1.24053
7.89476	1.17129
7.91309	1.2136
7.93143	1.24053
7.94977	1.15013
7.9681	0.980882
7.98644	1.03666
8.00478	0.990499
8.02311	1.03858
8.04145	0.980882
8.05979	0.977036
8.07813	0.867408
8.09646	0.984729
8.1148	0.859715
8.13314	0.794322
8.15147	0.855868
8.16981	0.796246
8.18815	0.778936
8.20648	0.800092
8.22482	0.821249
8.24316	0.74047
8.26149	0.76355
8.27983	0.782783
8.29817	0.72316
8.3165	0.715467
8.33484	0.727007
8.35318	0.72893
8.37152	0.638535
8.38985	0.75778
8.40819	0.630842
8.42653	0.713544
8.44486	0.657768
8.4632	0.646228
8.48154	0.696234
8.49987	0.594299
8.51821	0.71739
8.53655	0.667385
8.55488	0.634689
8.57322	0.671231
8.59156	0.615456
8.6099	0.632765
8.62823	0.628919
8.64657	0.655845
8.66491	0.575066
8.68324	0.677001
8.70158	0.630842
8.71992	0.575066
8.73825	0.600069
8.75659	0.617379
8.77493	0.642382
8.79326	0.636612
8.8116	0.607762
8.82994	0.540447
8.84828	0.573143
8.86661	0.588529
8.88495	0.588529
8.90329	0.551987
8.92162	0.588529
8.93996	0.55968
8.9583	0.546217
8.97663	0.546217
8.99497	0.557757
9.01331	0.515444
9.03164	0.563527
9.04998	0.54814
9.06832	0.488518
9.08665	0.54237
9.10499	0.53083
9.12333	0.538524
9.14167	0.544294
9.16	0.54237
9.17834	0.5366
9.19668	0.509674
9.21501	0.580836
9.23335	0.496211
9.25169	0.500058
9.27002	0.475055
9.28836	0.526984
9.3067	0.517367
9.32503	0.563527
9.34337	0.573143
9.36171	0.517367
9.38005	0.465438
9.39838	0.507751
9.41672	0.484671
9.43506	0.480825
9.45339	0.500058
9.47173	0.540447
9.49007	0.532754
9.5084	0.446205
9.52674	0.501981
9.54508	0.465438
9.56341	0.446205
9.58175	0.505828
9.60009	0.473132
9.61842	0.444282
9.63676	0.488518
9.6551	0.501981
9.67344	0.492365
9.69177	0.448129
9.71011	0.463515
9.72845	0.503904
9.74678	0.438512
9.76512	0.515444
9.78346	0.476978
9.80179	0.417356
9.82013	0.417356
9.83847	0.465438
9.8568	0.505828
9.87514	0.488518
9.89348	0.461592
9.91182	0.467362
9.93015	0.490441
9.94849	0.423126
9.96683	0.513521
9.98516	0.473132
10.0035	0.417356
10.0218	0.482748
10.0402	0.461592
10.0585	0.480825
10.0768	0.451975
10.0952	0.425049
10.1135	0.486595
10.1319	0.473132
10.1502	0.413509
10.1685	0.455822
10.1869	0.486595
10.2052	0.440435
10.2235	0.430819
10.2419	0.413509
10.2602	0.486595
10.2786	0.403893
10.2969	0.478901
10.3152	0.442359
10.3336	0.451975
10.3519	0.442359
10.3702	0.440435
10.3886	0.438512
10.4069	0.446205
10.4252	0.423126
10.4436	0.440435
10.4619	0.417356
10.4803	0.428896
10.4986	0.409663
10.5169	0.434666
10.5353	0.400046
10.5536	0.423126
10.5719	0.500058
10.5903	0.455822
10.6086	0.444282
10.627	0.413509
10.6453	0.392353
10.6636	0.473132
10.682	0.423126
10.7003	0.351964
10.7186	0.376967
10.737	0.434666
10.7553	0.438512
10.7736	0.388506
10.792	0.453899
10.8103	0.394276
10.8287	0.394276
10.847	0.398123
10.8653	0.409663
10.8837	0.467362
10.902	0.450052
10.9203	0.430819
10.9387	0.386583
10.957	0.413509
10.9754	0.471208
10.9937	0.419279
11.012	0.411586
11.0304	0.455822
11.0487	0.415433
11.067	0.38466
11.0854	0.37312
11.1037	0.407739
11.1221	0.451975
11.1404	0.430819
11.1587	0.375043
11.1771	0.405816
11.1954	0.37889
11.2137	0.421202
11.2321	0.363503
11.2504	0.388506
11.2687	0.413509
11.2871	0.37312
11.3054	0.394276
11.3238	0.448129
11.3421	0.400046
11.3604	0.376967
11.3788	0.417356
11.3971	0.411586
11.4154	0.382736
11.4338	0.382736
11.4521	0.425049
11.4705	0.371197
11.4888	0.415433
11.5071	0.438512
11.5255	0.38466
11.5438	0.425049
11.5621	0.417356
11.5805	0.413509
11.5988	0.432742
11.6171	0.353887
11.6355	0.415433
11.6538	0.336577
11.6722	0.401969
11.6905	0.401969
11.7088	0.36158
11.7272	0.405816
11.7455	0.380813
11.7638	0.371197
11.7822	0.39043
11.8005	0.417356
11.8189	0.425049
11.8372	0.376967
11.8555	0.430819
11.8739	0.380813
11.8922	0.37312
11.9105	0.442359
11.9289	0.457745
11.9472	0.36735
11.9655	0.388506
11.9839	0.3962
12.0022	0.426972
12.0206	0.376967
12.0389	0.434666
12.0572	0.37889
12.0756	0.392353
12.0939	0.409663
12.1122	0.459668
12.1306	0.398123
12.1489	0.407739
12.1673	0.401969
12.1856	0.476978
12.2039	0.419279
12.2223	0.438512
12.2406	0.448129
12.2589	0.448129
12.2773	0.39043
12.2956	0.451975
12.3139	0.417356
12.3323	0.453899
12.3506	0.482748
12.369	0.494288
12.3873	0.511597
12.4056	0.526984
12.424	0.515444
12.4423	0.598146
12.4606	0.600069
12.479	0.613532
12.4973	0.72316
12.5157	0.748163
12.534	0.759703
12.5523	0.953956
12.5707	0.94434
12.589	1.11167
12.6073	1.17898
12.6257	1.38093
12.644	1.54056
12.6624	1.77905
12.6807	2.11755
12.699	2.21179
12.7174	2.41951
12.7357	2.41566
12.754	2.21756
12.7724	1.90599
12.7907	1.54441
12.809	1.19052
12.8274	0.888564
12.8457	0.719314
12.8641	0.551987
12.8824	0.54814
12.9007	0.519291
12.9191	0.459668
12.9374	0.428896
12.9557	0.492365
12.9741	0.444282
12.9924	0.428896
13.0108	0.434666
13.0291	0.419279
13.0474	0.419279
13.0658	0.417356
13.0841	0.37312
13.1024	0.386583
13.1208	0.394276
13.1391	0.371197
13.1574	0.413509
13.1758	0.363503
13.1941	0.365427
13.2125	0.328884
13.2308	0.326961
13.2491	0.348117
13.2675	0.382736
13.2858	0.346194
13.3041	0.36158
13.3225	0.338501
13.3408	0.386583
13.3592	0.37312
13.3775	0.36158
13.3958	0.415433
13.4142	0.346194
13.4325	0.35004
13.4508	0.290418
13.4692	0.309651
13.4875	0.417356
13.5058	0.332731
13.5242	0.371197
13.5425	0.37312
13.5609	0.346194
13.5792	0.37312
13.5975	0.330807
13.6159	0.301958
13.6342	0.371197
13.6525	0.325038
13.6709	0.35004
13.6892	0.34427
13.7076	0.338501
13.7259	0.35581
13.7442	0.284648
13.7626	0.348117
13.7809	0.37312
13.7992	0.342347
13.8176	0.36735
13.8359	0.35004
13.8542	0.35004
13.8726	0.37312
13.8909	0.34427
13.9093	0.357734
13.9276	0.380813
13.9459	0.334654
13.9643	0.34427
13.9826	0.359657
14.0009	0.321191
14.0193	0.35581
14.0376	0.348117
14.056	0.325038
14.0743	0.315421
14.0926	0.326961
14.111	0.332731
14.1293	0.336577
14.1476	0.353887
14.166	0.36735
14.1843	0.386583
14.2026	0.375043
14.221	0.38466
14.2393	0.371197
14.2577	0.330807
14.276	0.36158
14.2943	0.419279
14.3127	0.409663
14.331	0.357734
14.3493	0.35004
14.3677	0.336577
14.386	0.398123
14.4044	0.363503
14.4227	0.388506
14.441	0.35581
14.4594	0.380813
14.4777	0.357734
14.496	0.423126
14.5144	0.369273
14.5327	0.363503
14.5511	0.400046
14.5694	0.407739
14.5877	0.409663
14.6061	0.473132
14.6244	0.413509
14.6427	0.382736
14.6611	0.451975
14.6794	0.392353
14.6977	0.432742
14.7161	0.394276
14.7344	0.436589
14.7528	0.382736
14.7711	0.398123
14.7894	0.380813
14.8078	0.334654
14.8261	0.36158
14.8444	0.326961
14.8628	0.319268
14.8811	0.338501
14.8995	0.332731
14.9178	0.353887
14.9361	0.351964
14.9545	0.301958
14.9728	0.336577
14.9911	0.340424
15.0095	0.346194
15.0278	0.357734
15.0461	0.34427
15.0645	0.307728
15.0828	0.321191
15.1012	0.376967
15.1195	0.323114
15.1378	0.34427
15.1562	0.342347
15.1745	0.334654
15.1928	0.35581
15.2112	0.35004
15.2295	0.311574
15.2479	0.365427
15.2662	0.307728
15.2845	0.319268
15.3029	0.325038
15.3212	0.35004
15.3395	0.317344
15.3579	0.317344
15.3762	0.296188
15.3945	0.359657
15.4129	0.346194
15.4312	0.35004
15.4496	0.319268
15.4679	0.305805
15.4862	0.371197
15.5046	0.401969
15.5229	0.334654
15.5412	0.365427
15.5596	0.39043
15.5779	0.363503
15.5963	0.357734
15.6146	0.359657
15.6329	0.365427
15.6513	0.417356
15.6696	0.386583
15.6879	0.428896
15.7063	0.425049
15.7246	0.405816
15.7429	0.386583
15.7613	0.461592
15.7796	0.503904
15.798	0.455822
15.8163	0.54814
15.8346	0.546217
15.853	0.634689
15.8713	0.584683
15.8896	0.678924
15.908	0.598146
15.9263	0.677001
15.9447	0.713544
15.963	0.759703
15.9813	0.700081
15.9997	0.680848
16.018	0.580836
16.0363	0.573143
16.0547	0.5366
16.073	0.463515
16.0914	0.532754
16.1097	0.455822
16.128	0.413509
16.1464	0.413509
16.1647	0.38466
16.183	0.438512
16.2014	0.430819
16.2197	0.394276
16.238	0.36735
16.2564	0.359657
16.2747	0.36735
16.2931	0.340424
16.3114	0.376967
16.3297	0.34427
16.3481	0.380813
16.3664	0.3962
16.3847	0.36158
16.4031	0.351964
16.4214	0.363503
16.4398	0.36735
16.4581	0.36158
16.4764	0.392353
16.4948	0.35004
16.5131	0.380813
16.5314	0.303881
16.5498	0.34427
16.5681	0.353887
16.5864	0.375043
16.6048	0.407739
16.6231	0.338501
16.6415	0.321191
16.6598	0.311574
16.6781	0.323114
16.6965	0.336577
16.7148	0.348117
16.7331	0.346194
16.7515	0.37889
16.7698	0.35004
16.7882	0.363503
16.8065	0.411586
16.8248	0.351964
16.8432	0.365427
16.8615	0.315421
16.8798	0.375043
16.8982	0.36158
16.9165	0.340424
16.9348	0.3962
16.9532	0.328884
16.9715	0.371197
16.9899	0.386583
17.0082	0.351964
17.0265	0.35581
17.0449	0.37889
17.0632	0.369273
17.0815	0.330807
17.0999	0.375043
17.1182	0.35004
17.1366	0.375043
17.1549	0.376967
17.1732	0.403893
17.1916	0.375043
17.2099	0.357734
17.2282	0.36158
17.2466	0.380813
17.2649	0.434666
17.2832	0.421202
17.3016	0.405816
17.3199	0.432742
17.3383	0.451975
17.3566	0.513521
17.3749	0.482748
17.3933	0.496211
17.4116	0.461592
17.4299	0.519291
17.4483	0.534677
17.4666	0.551987
17.485	0.580836
17.5033	0.592376
17.5216	0.673155
17.54	0.653922
17.5583	0.698157
17.5766	0.694311
17.595	0.700081
17.6133	0.700081
17.6316	0.636612
17.65	0.586606
17.6683	0.596223
17.6867	0.609686
17.705	0.623149
17.7233	0.509674
17.7417	0.519291
17.76	0.507751
17.7783	0.415433
17.7967	0.463515
17.815	0.403893
17.8334	0.490441
17.8517	0.421202
17.87	0.38466
17.8884	0.421202
17.9067	0.455822
17.925	0.478901
17.9434	0.448129
17.9617	0.490441
17.9801	0.465438
17.9984	0.471208
18.0167	0.438512
18.0351	0.428896
18.0534	0.517367
18.0717	0.482748
18.0901	0.430819
18.1084	0.473132
18.1267	0.434666
18.1451	0.432742
18.1634	0.423126
18.1818	0.405816
18.2001	0.450052
18.2184	0.415433
18.2368	0.39043
18.2551	0.448129
18.2734	0.375043
18.2918	0.388506
18.3101	0.405816
18.3285	0.38466
18.3468	0.446205
18.3651	0.442359
18.3835	0.405816
18.4018	0.386583
18.4201	0.36158
18.4385	0.388506
18.4568	0.382736
18.4751	0.457745
18.4935	0.436589
18.5118	0.417356
18.5302	0.444282
18.5485	0.465438
18.5668	0.455822
18.5852	0.415433
18.6035	0.428896
18.6218	0.465438
18.6402	0.503904
18.6585	0.442359
18.6769	0.442359
18.6952	0.509674
18.7135	0.473132
18.7319	0.478901
18.7502	0.446205
18.7685	0.407739
18.7869	0.448129
18.8052	0.434666
18.8235	0.505828
18.8419	0.490441
18.8602	0.457745
18.8786	0.498134
18.8969	0.432742
18.9152	0.519291
18.9336	0.573143
18.9519	0.509674
18.9702	0.492365
18.9886	0.586606
19.0069	0.5366
19.0253	0.603916
19.0436	0.540447
19.0619	0.5366
19.0803	0.675078
19.0986	0.594299
19.1169	0.640459
19.1353	0.673155
19.1536	0.819325
19.1719	0.832788
19.1903	0.953956
19.2086	0.928953
19.227	1.02896
19.2453	0.992422
19.2636	1.1059
19.282	1.29823
19.3003	1.55018
19.3186	1.72905
19.337	1.96561
19.3553	2.31565
19.3737	2.79455
19.392	3.41578
19.4103	4.23895
19.4287	4.78132
19.447	5.63719
19.4653	6.76617
19.4837	7.41624
19.502	8.07209
19.5204	8.11824
19.5387	7.24507
19.557	6.39882
19.5754	5.36985
19.5937	4.05047
19.612	3.18306
19.6304	2.51183
19.6487	1.93099
19.667	1.71558
19.6854	1.51556
19.7037	1.2463
19.7221	1.1059
19.7404	0.948186
19.7587	0.890487
19.7771	0.884717
19.7954	0.794322
19.8137	0.684694
19.8321	0.686618
19.8504	0.613532
19.8688	0.677001
19.8871	0.615456
19.9054	0.538524
19.9238	0.569296
19.9421	0.496211
19.9604	0.519291
19.9788	0.507751
19.9971	0.596223
20.0154	0.511597
20.0338	0.488518
20.0521	0.463515
20.0705	0.490441
20.0888	0.532754
20.1071	0.505828
20.1255	0.478901
20.1438	0.471208
20.1621	0.459668
20.1805	0.513521
20.1988	0.473132
20.2172	0.453899
20.2355	0.457745
20.2538	0.467362
20.2722	0.503904
20.2905	0.430819
20.3088	0.490441
20.3272	0.494288
20.3455	0.505828
20.3638	0.442359
20.3822	0.513521
20.4005	0.480825
20.4189	0.546217
20.4372	0.438512
20.4555	0.523137
20.4739	0.513521
20.4922	0.467362
20.5105	0.55968
20.5289	0.525061
20.5472	0.455822
20.5656	0.53083
20.5839	0.532754
20.6022	0.478901
20.6206	0.513521
20.6389	0.503904
20.6572	0.484671
20.6756	0.517367
20.6939	0.517367
20.7122	0.505828
20.7306	0.538524
20.7489	0.54814
20.7673	0.488518
20.7856	0.5366
20.8039	0.632765
20.8223	0.615456
20.8406	0.578913
20.8589	0.650075
20.8773	0.634689
20.8956	0.54814
20.914	0.640459
20.9323	0.601993
20.9506	0.588529
20.969	0.609686
20.9873	0.555833
21.0056	0.563527
21.024	0.598146
21.0423	0.55391
21.0607	0.532754
21.079	0.509674
21.0973	0.53083
21.1157	0.521214
21.134	0.586606
21.1523	0.563527
21.1707	0.513521
21.189	0.532754
21.2073	0.55391
21.2257	0.584683
21.244	0.563527
21.2624	0.592376
21.2807	0.523137
21.299	0.578913
21.3174	0.575066
21.3357	0.5366
21.354	0.58276
21.3724	0.657768
21.3907	0.642382
21.4091	0.72893
21.4274	0.76355
21.4457	0.669308
21.4641	0.815479
21.4824	0.798169
21.5007	0.878948
21.5191	0.923183
21.5374	0.952033
21.5557	1.03666
21.5741	1.2963
21.5924	1.35593
21.6108	1.45401
21.6291	1.67904
21.6474	1.78674
21.6658	2.02716
21.6841	2.28873
21.7024	2.55029
21.7208	2.68685
21.7391	2.89456
21.7575	3.01573
21.7758	2.90803
21.7941	3.07151
21.8125	2.92534
21.8308	2.55606
21.8491	2.23487
21.8675	1.99061
21.8858	1.88291
21.9041	1.73097
21.9225	1.54826
21.9408	1.33092
21.9592	1.26168
21.9775	1.27515
21.9958	1.09051
22.0142	1.11551
22.0325	1.12321
22.0508	1.11167
22.0692	1.20783
22.0875	1.22706
22.1059	1.304
22.1242	1.4367
22.1425	1.44055
22.1609	1.4367
22.1792	1.50017
22.1975	1.46748
22.2159	1.2713
22.2342	1.17706
22.2525	1.1059
22.2709	1.10397
22.2892	0.948186
22.3076	0.875101
22.3259	0.819325
22.3442	0.790476
22.3626	0.823172
22.3809	0.713544
22.3992	0.657768
22.4176	0.594299
22.4359	0.636612
22.4543	0.54814
22.4726	0.517367
22.4909	0.555833
22.5093	0.523137
22.5276	0.486595
22.5459	0.532754
22.5643	0.494288
22.5826	0.482748
22.6009	0.440435
22.6193	0.498134
22.6376	0.492365
22.656	0.523137
22.6743	0.467362
22.6926	0.425049
22.711	0.461592
22.7293	0.463515
22.7476	0.465438
22.766	0.459668
22.7843	0.484671
22.8027	0.401969
22.821	0.401969
22.8393	0.411586
22.8577	0.436589
22.876	0.405816
22.8943	0.463515
22.9127	0.413509
22.931	0.446205
22.9494	0.430819
22.9677	0.465438
22.986	0.455822
23.0044	0.436589
23.0227	0.455822
23.041	0.434666
23.0594	0.450052
23.0777	0.469285
23.096	0.419279
23.1144	0.440435
23.1327	0.417356
23.1511	0.471208
23.1694	0.448129
23.1877	0.444282
23.2061	0.476978
23.2244	0.436589
23.2427	0.475055
23.2611	0.434666
23.2794	0.459668
23.2978	0.469285
23.3161	0.436589
23.3344	0.515444
23.3528	0.5366
23.3711	0.451975
23.3894	0.484671
23.4078	0.478901
23.4261	0.446205
23.4444	0.482748
23.4628	0.475055
23.4811	0.451975
23.4995	0.507751
23.5178	0.557757
23.5361	0.496211
23.5545	0.511597
23.5728	0.446205
23.5911	0.446205
23.6095	0.37889
23.6278	0.401969
23.6462	0.421202
23.6645	0.486595
23.6828	0.432742
23.7012	0.436589
23.7195	0.428896
23.7378	0.426972
23.7562	0.463515
23.7745	0.423126
23.7928	0.423126
23.8112	0.434666
23.8295	0.446205
23.8479	0.434666
23.8662	0.534677
23.8845	0.517367
23.9029	0.525061
23.9212	0.444282
23.9395	0.550063
23.9579	0.509674
23.9762	0.580836
23.9946	0.600069
24.0129	0.72316
24.0312	0.75201
24.0496	0.765473
24.0679	0.790476
24.0862	0.942416
24.1046	1.06358
24.1229	1.07512
24.1412	1.05589
24.1596	1.12321
24.1779	1.19052
24.1963	1.18091
24.2146	1.11167
24.2329	0.982806
24.2513	1.04627
24.2696	0.913567
24.2879	0.898181
24.3063	0.778936
24.3246	0.75201
24.343	0.750087
24.3613	0.634689
24.3796	0.659691
24.398	0.550063
24.4163	0.54814
24.4346	0.578913
24.453	0.598146
24.4713	0.601993
24.4897	0.54237
24.508	0.650075
24.5263	0.588529
24.5447	0.651998
24.563	0.584683
24.5813	0.561603
24.5997	0.634689
24.618	0.584683
24.6363	0.611609
24.6547	0.503904
24.673	0.586606
24.6914	0.561603
24.7097	0.569296
24.728	0.467362
24.7464	0.478901
24.7647	0.486595
24.783	0.496211
24.8014	0.430819
24.8197	0.436589
24.8381	0.426972
24.8564	0.421202
24.8747	0.440435
24.8931	0.394276
24.9114	0.425049
24.9297	0.403893
24.9481	0.448129
24.9664	0.382736
24.9847	0.35004
25.0031	0.37312
25.0214	0.400046
25.0398	0.365427
25.0581	0.346194
25.0764	0.326961
25.0948	0.357734
25.1131	0.340424
25.1314	0.353887
25.1498	0.353887
25.1681	0.319268
25.1865	0.359657
25.2048	0.307728
25.2231	0.34427
25.2415	0.351964
25.2598	0.334654
25.2781	0.326961
25.2965	0.365427
25.3148	0.369273
25.3331	0.313498
25.3515	0.357734
25.3698	0.359657
25.3882	0.332731
25.4065	0.359657
25.4248	0.34427
25.4432	0.357734
25.4615	0.375043
25.4798	0.380813
25.4982	0.382736
25.5165	0.359657
25.5349	0.36735
25.5532	0.35581
25.5715	0.411586
25.5899	0.426972
25.6082	0.463515
25.6265	0.5366
25.6449	0.448129
25.6632	0.451975
25.6815	0.505828
25.6999	0.469285
25.7182	0.461592
25.7366	0.446205
25.7549	0.465438
25.7732	0.471208
25.7916	0.505828
25.8099	0.434666
25.8282	0.475055
25.8466	0.407739
25.8649	0.359657
25.8833	0.434666
25.9016	0.403893
25.9199	0.365427
25.9383	0.351964
25.9566	0.398123
25.9749	0.321191
25.9933	0.353887
26.0116	0.330807
26.0299	0.334654
26.0483	0.309651
26.0666	0.325038
26.085	0.334654
26.1033	0.326961
26.1216	0.267339
26.14	0.351964
26.1583	0.328884
26.1766	0.328884
26.195	0.332731
26.2133	0.330807
26.2317	0.351964
26.25	0.294265
26.2683	0.34427
26.2867	0.303881
26.305	0.275032
26.3233	0.325038
26.3417	0.325038
26.36	0.332731
26.3784	0.334654
26.3967	0.319268
26.415	0.336577
26.4334	0.36735
26.4517	0.303881
26.47	0.330807
26.4884	0.303881
26.5067	0.38466
26.525	0.336577
26.5434	0.405816
26.5617	0.363503
26.5801	0.417356
26.5984	0.35581
26.6167	0.442359
26.6351	0.455822
26.6534	0.473132
26.6717	0.478901
26.6901	0.55968
26.7084	0.507751
26.7268	0.56545
26.7451	0.534677
26.7634	0.457745
26.7818	0.501981
26.8001	0.515444
26.8184	0.451975
26.8368	0.484671
26.8551	0.465438
26.8734	0.488518
26.8918	0.38466
26.9101	0.436589
26.9285	0.405816
26.9468	0.403893
26.9651	0.423126
26.9835	0.376967
27.0018	0.438512
27.0201	0.480825
27.0385	0.36735
27.0568	0.376967
27.0752	0.375043
27.0935	0.336577
27.1118	0.430819
27.1302	0.409663
27.1485	0.475055
27.1668	0.413509
27.1852	0.436589
27.2035	0.473132
27.2218	0.517367
27.2402	0.611609
27.2585	0.617379
27.2769	0.657768
27.2952	0.736623
27.3135	0.852021
27.3319	0.900104
27.3502	0.90395
27.3685	1.03089
27.3869	1.01166
27.4052	1.05974
27.4236	1.04627
27.4419	1.10013
27.4602	1.07705
27.4786	0.965496
27.4969	0.869331
27.5152	0.871254
27.5336	0.817402
27.5519	0.840482
27.5702	0.646228
27.5886	0.58276
27.6069	0.5366
27.6253	0.54237
27.6436	0.550063
27.6619	0.517367
27.6803	0.469285
27.6986	0.480825
27.7169	0.509674
27.7353	0.3962
27.7536	0.434666
27.772	0.365427
27.7903	0.442359
27.8086	0.446205
27.827	0.417356
27.8453	0.382736
27.8636	0.353887
27.882	0.400046
27.9003	0.413509
27.9187	0.336577
27.937	0.365427
27.9553	0.35581
27.9737	0.388506
27.992	0.38466
28.0103	0.338501
28.0287	0.338501
28.047	0.35581
28.0653	0.407739
28.0837	0.415433
28.102	0.419279
28.1204	0.394276
28.1387	0.444282
28.157	0.463515
28.1754	0.455822
28.1937	0.436589
28.212	0.457745
28.2304	0.55968
28.2487	0.592376
28.2671	0.613532
28.2854	0.678924
28.3037	0.696234
28.3221	0.825095
28.3404	0.873178
28.3587	0.93857
28.3771	0.946263
28.3954	1.10782
28.4137	1.04243
28.4321	1.06358
28.4504	1.06551
28.4688	0.978959
28.4871	0.90972
28.5054	0.819325
28.5238	0.813555
28.5421	0.715467
28.5604	0.584683
28.5788	0.588529
28.5971	0.511597
28.6155	0.476978
28.6338	0.400046
28.6521	0.426972
28.6705	0.521214
28.6888	0.371197
28.7071	0.419279
28.7255	0.405816
28.7438	0.409663
28.7621	0.392353
28.7805	0.351964
28.7988	0.371197
28.8172	0.336577
28.8355	0.340424
28.8538	0.303881
28.8722	0.326961
28.8905	0.325038
28.9088	0.348117
28.9272	0.311574
28.9455	0.303881
28.9639	0.269262
28.9822	0.294265
29.0005	0.325038
29.0189	0.336577
29.0372	0.288495
29.0555	0.288495
29.0739	0.296188
29.0922	0.265415
29.1105	0.250029
29.1289	0.301958
29.1472	0.275032
29.1656	0.253875
29.1839	0.271185
29.2022	0.236566
29.2206	0.263492
29.2389	0.298111
29.2572	0.242336
29.2756	0.276955
29.2939	0.280802
29.3123	0.234642
29.3306	0.280802
29.3489	0.298111
29.3673	0.276955
29.3856	0.282725
29.4039	0.321191
29.4223	0.296188
29.4406	0.346194
29.459	0.305805
29.4773	0.282725
29.4956	0.326961
29.514	0.288495
29.5323	0.290418
29.5506	0.311574
29.569	0.250029
29.5873	0.305805
29.6056	0.34427
29.624	0.317344
29.6423	0.305805
29.6607	0.336577
29.679	0.309651
29.6973	0.313498
29.7157	0.305805
29.734	0.300035
29.7523	0.301958
29.7707	0.303881
29.789	0.334654
29.8074	0.288495
29.8257	0.315421
29.844	0.263492
29.8624	0.309651
29.8807	0.269262
29.899	0.284648
29.9174	0.273108
29.9357	0.259645
29.954	0.255799
29.9724	0.248106
29.9907	0.269262
30.0091	0.253875
30.0274	0.257722
30.0457	0.230796
30.0641	0.226949
30.0824	0.236566
30.1007	0.278878
30.1191	0.226949
30.1374	0.261569
30.1558	0.213486
30.1741	0.240412
30.1924	0.221179
30.2108	0.242336
30.2291	0.225026
30.2474	0.234642
30.2658	0.236566
30.2841	0.284648
30.3024	0.225026
30.3208	0.225026
30.3391	0.213486
30.3575	0.223103
30.3758	0.230796
30.3941	0.207716
30.4125	0.240412
30.4308	0.250029
30.4491	0.238489
30.4675	0.196176
30.4858	0.242336
30.5042	0.200023
30.5225	0.238489
30.5408	0.207716
30.5592	0.246182
30.5775	0.228873
30.5958	0.226949
30.6142	0.259645
30.6325	0.242336
30.6508	0.276955
30.6692	0.269262
30.6875	0.280802
30.7059	0.273108
30.7242	0.238489
30.7425	0.246182
30.7609	0.271185
30.7792	0.288495
30.7975	0.298111
30.8159	0.275032
30.8342	0.261569
30.8526	0.234642
30.8709	0.263492
30.8892	0.273108
30.9076	0.263492
30.9259	0.253875
30.9442	0.251952
30.9626	0.250029
30.9809	0.20964
30.9992	0.205793
31.0176	0.250029
31.0359	0.269262
31.0543	0.271185
31.0726	0.294265
31.0909	0.301958
31.1093	0.294265
31.1276	0.321191
31.1459	0.311574
31.1643	0.319268
31.1826	0.36735
31.201	0.369273
31.2193	0.35581
31.2376	0.369273
31.256	0.380813
31.2743	0.394276
31.2926	0.426972
31.311	0.382736
31.3293	0.388506
31.3477	0.36735
31.366	0.317344
31.3843	0.363503
31.4027	0.286572
31.421	0.336577
31.4393	0.298111
31.4577	0.280802
31.476	0.328884
31.4943	0.332731
31.5127	0.313498
31.531	0.338501
31.5494	0.369273
31.5677	0.365427
31.586	0.286572
31.6044	0.332731
31.6227	0.271185
31.641	0.326961
31.6594	0.257722
31.6777	0.251952
31.6961	0.265415
31.7144	0.244259
31.7327	0.259645
31.7511	0.265415
31.7694	0.265415
31.7877	0.20964
31.8061	0.20964
31.8244	0.205793
31.8427	0.242336
31.8611	0.217333
31.8794	0.211563
31.8978	0.221179
31.9161	0.213486
31.9344	0.234642
31.9528	0.225026
31.9711	0.205793
31.9894	0.242336
32.0078	0.226949
32.0261	0.211563
32.0445	0.230796
32.0628	0.238489
32.0811	0.219256
32.0995	0.217333
32.1178	0.205793
32.1361	0.232719
32.1545	0.20964
32.1728	0.238489
32.1911	0.246182
32.2095	0.240412
32.2278	0.228873
32.2462	0.244259
32.2645	0.273108
32.2828	0.259645
32.3012	0.255799
32.3195	0.213486
32.3378	0.288495
32.3562	0.246182
32.3745	0.255799
32.3929	0.255799
32.4112	0.284648
32.4295	0.265415
32.4479	0.305805
32.4662	0.230796
32.4845	0.298111
32.5029	0.276955
32.5212	0.305805
32.5395	0.263492
32.5579	0.282725
32.5762	0.267339
32.5946	0.275032
32.6129	0.296188
32.6312	0.238489
32.6496	0.255799
32.6679	0.257722
32.6862	0.205793
32.7046	0.271185
32.7229	0.263492
32.7413	0.207716
32.7596	0.257722
32.7779	0.267339
32.7963	0.265415
32.8146	0.221179
32.8329	0.240412
32.8513	0.236566
32.8696	0.196176
32.888	0.201946
32.9063	0.201946
32.9246	0.217333
32.943	0.269262
32.9613	0.217333
32.9796	0.250029
32.998	0.201946
33.0163	0.230796
33.0346	0.194253
33.053	0.248106
33.0713	0.20387
33.0897	0.250029
33.108	0.253875
33.1263	0.242336
33.1447	0.230796
33.163	0.259645
33.1813	0.213486
33.1997	0.242336
33.218	0.217333
33.2364	0.228873
33.2547	0.217333
33.273	0.232719
33.2914	0.244259
33.3097	0.219256
33.328	0.215409
33.3464	0.200023
33.3647	0.261569
33.383	0.230796
33.4014	0.223103
33.4197	0.219256
33.4381	0.234642
33.4564	0.265415
33.4747	0.240412
33.4931	0.225026
33.5114	0.251952
33.5297	0.265415
33.5481	0.236566
33.5664	0.267339
33.5848	0.280802
33.6031	0.217333
33.6214	0.273108
33.6398	0.311574
33.6581	0.340424
33.6764	0.334654
33.6948	0.305805
33.7131	0.357734
33.7314	0.34427
33.7498	0.421202
33.7681	0.478901
33.7865	0.509674
33.8048	0.494288
33.8231	0.519291
33.8415	0.57122
33.8598	0.567373
33.8781	0.640459
33.8965	0.573143
33.9148	0.590453
33.9332	0.57122
33.9515	0.526984
33.9698	0.471208
33.9882	0.496211
34.0065	0.392353
34.0248	0.425049
34.0432	0.353887
34.0615	0.325038
34.0798	0.326961
34.0982	0.311574
34.1165	0.296188
34.1349	0.273108
34.1532	0.280802
34.1715	0.257722
34.1899	0.217333
34.2082	0.246182
34.2265	0.232719
34.2449	0.217333
34.2632	0.219256
34.2816	0.265415
34.2999	0.207716
34.3182	0.20964
34.3366	0.255799
34.3549	0.20964
34.3732	0.207716
34.3916	0.259645
34.4099	0.240412
34.4282	0.215409
34.4466	0.250029
34.4649	0.217333
34.4833	0.261569
34.5016	0.242336
34.5199	0.1981
34.5383	0.248106
34.5566	0.234642
34.5749	0.194253
34.5933	0.188483
34.6116	0.207716
34.63	0.20387
34.6483	0.244259
34.6666	0.146171
34.685	0.232719
34.7033	0.223103
34.7216	0.228873
34.74	0.207716
34.7583	0.223103
34.7767	0.200023
34.795	0.20387
34.8133	0.182713
34.8317	0.215409
34.85	0.194253
34.8683	0.230796
34.8867	0.211563
34.905	0.211563
34.9233	0.188483
34.9417	0.223103
34.96	0.207716
34.9784	0.244259
34.9967	0.236566
35.015	0.20964
35.0334	0.190407
35.0517	0.215409
35.07	0.226949
35.0884	0.196176
35.1067	0.211563
35.1251	0.207716
35.1434	0.219256
35.1617	0.205793
35.1801	0.20964
35.1984	0.263492
35.2167	0.246182
35.2351	0.267339
35.2534	0.190407
35.2717	0.228873
35.2901	0.223103
35.3084	0.240412
35.3268	0.246182
35.3451	0.271185
35.3634	0.273108
35.3818	0.292341
35.4001	0.317344
35.4184	0.317344
35.4368	0.315421
35.4551	0.365427
35.4735	0.376967
35.4918	0.365427
35.5101	0.394276
35.5285	0.403893
35.5468	0.400046
35.5651	0.419279
35.5835	0.434666
35.6018	0.338501
35.6201	0.376967
35.6385	0.330807
35.6568	0.336577
35.6752	0.315421
35.6935	0.273108
35.7118	0.296188
35.7302	0.288495
35.7485	0.278878
35.7668	0.267339
35.7852	0.246182
35.8035	0.265415
35.8219	0.251952
35.8402	0.251952
35.8585	0.286572
35.8769	0.232719
35.8952	0.273108
35.9135	0.253875
35.9319	0.230796
35.9502	0.20387
35.9685	0.259645
35.9869	0.259645
36.0052	0.219256
36.0236	0.19233
36.0419	0.184637
36.0602	0.242336
36.0786	0.225026
36.0969	0.228873
36.1152	0.18656
36.1336	0.207716
36.1519	0.201946
36.1703	0.228873
36.1886	0.178867
36.2069	0.188483
36.2253	0.226949
36.2436	0.213486
36.2619	0.17502
36.2803	0.20387
36.2986	0.207716
36.317	0.1981
36.3353	0.240412
36.3536	0.215409
36.372	0.244259
36.3903	0.207716
36.4086	0.211563
36.427	0.250029
36.4453	0.176943
36.4636	0.19233
36.482	0.20964
36.5003	0.182713
36.5187	0.244259
36.537	0.190407
36.5553	0.238489
36.5737	0.223103
36.592	0.240412
36.6103	0.225026
36.6287	0.250029
36.647	0.219256
36.6654	0.282725
36.6837	0.230796
36.702	0.265415
36.7204	0.215409
36.7387	0.246182
36.757	0.1981
36.7754	0.238489
36.7937	0.211563
36.812	0.20964
36.8304	0.201946
36.8487	0.213486
36.8671	0.201946
36.8854	0.211563
36.9037	0.207716
36.9221	0.188483
36.9404	0.165404
36.9587	0.215409
36.9771	0.211563
36.9954	0.17502
37.0138	0.176943
37.0321	0.207716
37.0504	0.184637
37.0688	0.196176
37.0871	0.211563
37.1054	0.207716
37.1238	0.20964
37.1421	0.148094
37.1604	0.184637
37.1788	0.20964
37.1971	0.18656
37.2155	0.184637
37.2338	0.157711
37.2521	0.219256
37.2705	0.16348
37.2888	0.1981
37.3071	0.19233
37.3255	0.182713
37.3438	0.205793
37.3622	0.219256
37.3805	0.196176
37.3988	0.20387
37.4172	0.17502
37.4355	0.176943
37.4538	0.17502
37.4722	0.18079
37.4905	0.20387
37.5088	0.178867
37.5272	0.18656
37.5455	0.18656
37.5639	0.188483
37.5822	0.161557
37.6005	0.20387
37.6189	0.182713
37.6372	0.182713
37.6555	0.190407
37.6739	0.159634
37.6922	0.205793
37.7106	0.171174
37.7289	0.18656
37.7472	0.1981
37.7656	0.165404
37.7839	0.182713
37.8022	0.171174
37.8206	0.178867
37.8389	0.200023
37.8573	0.18079
37.8756	0.144247
37.8939	0.128861
37.9123	0.165404
37.9306	0.221179
37.9489	0.16348
37.9673	0.188483
37.9856	0.19233
38.0039	0.182713
38.0223	0.176943
38.0406	0.211563
38.059	0.190407
38.0773	0.18079
38.0956	0.165404
38.114	0.205793
38.1323	0.182713
38.1506	0.213486
38.169	0.17502
38.1873	0.182713
38.2057	0.18656
38.224	0.225026
38.2423	0.173097
38.2607	0.173097
38.279	0.228873
38.2973	0.19233
38.3157	0.18079
38.334	0.201946
38.3523	0.16925
38.3707	0.201946
38.389	0.19233
38.4074	0.20964
38.4257	0.17502
38.444	0.173097
38.4624	0.20387
38.4807	0.167327
38.499	0.201946
38.5174	0.167327
38.5357	0.190407
38.5541	0.221179
38.5724	0.1981
38.5907	0.20387
38.6091	0.223103
38.6274	0.20964
38.6457	0.184637
38.6641	0.244259
38.6824	0.223103
38.7007	0.257722
38.7191	0.211563
38.7374	0.196176
38.7558	0.223103
38.7741	0.232719
38.7924	0.236566
38.8108	0.250029
38.8291	0.242336
38.8474	0.226949
38.8658	0.261569
38.8841	0.253875
38.9025	0.280802
38.9208	0.236566
38.9391	0.248106
38.9575	0.211563
38.9758	0.230796
38.9941	0.261569
39.0125	0.1981
39.0308	0.257722
39.0491	0.217333
39.0675	0.248106
39.0858	0.244259
39.1042	0.207716
39.1225	0.207716
39.1408	0.246182
39.1592	0.223103
39.1775	0.190407
39.1958	0.20964
39.2142	0.223103
39.2325	0.161557
39.2509	0.223103
39.2692	0.200023
39.2875	0.242336
39.3059	0.240412
39.3242	0.225026
39.3425	0.200023
39.3609	0.173097
39.3792	0.211563
39.3975	0.236566
39.4159	0.1981
39.4342	0.242336
39.4526	0.217333
39.4709	0.234642
39.4892	0.267339
39.5076	0.242336
39.5259	0.255799
39.5442	0.253875
39.5626	0.311574
39.5809	0.309651
39.5993	0.294265
39.6176	0.307728
39.6359	0.330807
39.6543	0.359657
39.6726	0.332731
39.6909	0.332731
39.7093	0.238489
39.7276	0.280802
39.746	0.259645
39.7643	0.20964
39.7826	0.257722
39.801	0.255799
39.8193	0.240412
39.8376	0.226949
39.856	0.290418
39.8743	0.223103
39.8926	0.219256
39.911	0.236566
39.9293	0.232719
39.9477	0.242336
39.966	0.217333
39.9843	0.226949
40.0027	0.207716
40.021	0.226949
40.0393	0.273108
40.0577	0.200023
40.076	0.246182
40.0944	0.240412
40.1127	0.234642
40.131	0.205793
40.1494	0.259645
40.1677	0.257722
40.186	0.205793
40.2044	0.230796
40.2227	0.271185
40.241	0.263492
40.2594	0.20964
40.2777	0.267339
40.2961	0.261569
40.3144	0.223103
40.3327	0.250029
40.3511	0.244259
40.3694	0.207716
40.3877	0.240412
40.4061	0.18656
40.4244	0.236566
40.4428	0.236566
40.4611	0.248106
40.4794	0.242336
40.4978	0.236566
40.5161	0.234642
40.5344	0.223103
[truncated: 1,056 more rows]

## Sheet: Cooling 125 °C
2theta	Intensity
3.89731	1.39247
3.91565	1.44055
3.93399	1.49056
3.95232	1.53287
3.97066	1.41747
3.989	1.42324
4.00733	1.34823
4.02567	1.3867
4.04401	1.34631
4.06234	1.35785
4.08068	1.34246
4.09902	1.40208
4.11735	1.41939
4.13569	1.37708
4.15403	1.40401
4.17237	1.329
4.1907	1.33477
4.20904	1.33092
4.22738	1.354
4.24571	1.3867
4.26405	1.26745
4.28239	1.36362
4.30072	1.329
4.31906	1.39631
4.3374	1.29438
4.35573	1.3617
4.37407	1.25014
4.39241	1.28476
4.41075	1.26553
4.42908	1.24437
4.44742	1.32515
4.46576	1.2463
4.48409	1.28092
4.50243	1.31554
4.52077	1.26168
4.5391	1.29053
4.55744	1.35208
4.57578	1.23668
4.59411	1.33092
4.61245	1.30592
4.63079	1.23283
4.64913	1.21937
4.66746	1.304
4.6858	1.19822
4.70414	1.22322
4.72247	1.22706
4.74081	1.20399
4.75915	1.17898
4.77748	1.17514
4.79582	1.19437
4.81416	1.19245
4.83249	1.17514
4.85083	1.22322
4.86917	1.15398
4.8875	1.14629
4.90584	1.25014
4.92418	1.21552
4.94252	1.21552
4.96085	1.28284
4.97919	1.1309
4.99753	1.19822
5.01586	1.19437
5.0342	1.10205
5.05254	1.15783
5.07087	1.20975
5.08921	1.12898
5.10755	1.20399
5.12588	1.17898
5.14422	1.15013
5.16256	1.00589
5.1809	1.23091
5.19923	1.10974
5.21757	1.12128
5.23591	1.12128
5.25424	1.10974
5.27258	1.19052
5.29092	1.14821
5.30925	1.13667
5.32759	1.1059
5.34593	1.12321
5.36426	1.07512
5.3826	1.14052
5.40094	1.11744
5.41927	1.15783
5.43761	1.15975
5.45595	1.13475
5.47429	1.10205
5.49262	1.11167
5.51096	1.11936
5.5293	1.13475
5.54763	1.12705
5.56597	1.06935
5.58431	1.19245
5.60264	1.12128
5.62098	1.14629
5.63932	1.08474
5.65765	1.00204
5.67599	1.11936
5.69433	1.12321
5.71267	1.02896
5.731	1.25784
5.74934	1.06358
5.76768	1.16744
5.78601	1.20975
5.80435	1.16552
5.82269	1.16167
5.84102	1.25784
5.85936	1.1309
5.8777	1.22706
5.89603	1.2713
5.91437	1.22129
5.93271	1.14244
5.95104	1.22322
5.96938	1.25014
5.98772	1.25976
6.00606	1.26938
6.02439	1.23283
6.04273	1.329
6.06107	1.42324
6.0794	1.37131
6.09774	1.42516
6.11608	1.43478
6.13441	1.44824
6.15275	1.48863
6.17109	1.49248
6.18942	1.48671
6.20776	1.56172
6.2261	1.6925
6.24444	1.69058
6.26277	1.71366
6.28111	1.75405
6.29945	1.88291
6.31778	1.8329
6.33612	1.87329
6.35446	1.96176
6.37279	2.05793
6.39113	2.09063
6.40947	2.14063
6.4278	2.30604
6.44614	2.29834
6.46448	2.57914
6.48282	2.58299
6.50115	2.75609
6.51949	2.76955
6.53783	2.92918
6.55616	3.08689
6.5745	3.32346
6.59284	3.37539
6.61117	3.65427
6.62951	4.12932
6.64785	4.22549
6.66618	4.53514
6.68452	4.77555
6.70286	5.20637
6.72119	5.38524
6.73953	5.77951
6.75787	6.14109
6.77621	6.39112
6.79454	7.04697
6.81288	7.27392
6.83122	8.1144
6.84955	8.55291
6.86789	9.37608
6.88623	10.0858
6.90456	11.034
6.9229	12.3457
6.94124	13.2361
6.95957	14.5094
6.97791	15.8384
6.99625	17.5674
7.01459	19.0137
7.03292	20.7235
7.05126	22.6507
7.0696	25.3895
7.08793	27.005
7.10627	29.9419
7.12461	33.7366
7.14294	37.0427
7.16128	40.9278
7.17962	45.9707
7.19795	52.106
7.21629	59.2761
7.23463	67.5424
7.25296	78.7937
7.2713	90.2739
7.28964	104.056
7.30798	118.891
7.32631	133.463
7.34465	144.174
7.36299	143.817
7.38132	128.551
7.39966	104.987
7.418	81.9825
7.43633	59.4915
7.45467	42.278
7.47301	29.7861
7.49134	22.6622
7.50968	17.752
7.52802	14.0035
7.54636	10.3108
7.56469	7.34123
7.58303	5.341
7.60137	4.12548
7.6197	3.35423
7.63804	2.97919
7.65638	2.66569
7.67471	2.43105
7.69305	2.32334
7.71139	2.06178
7.72972	1.90407
7.74806	1.88676
7.7664	1.59634
7.78473	1.56172
7.80307	1.42132
7.82141	1.46171
7.83975	1.31746
7.85808	1.38862
7.87642	1.33477
7.89476	1.08282
7.91309	1.20014
7.93143	1.19629
7.94977	1.0405
7.9681	1.11744
7.98644	1.13282
8.00478	0.988576
8.02311	1.00204
8.04145	0.946263
8.05979	0.95588
8.07813	0.892411
8.09646	0.877024
8.1148	0.867408
8.13314	0.780859
8.15147	0.840482
8.16981	0.848175
8.18815	0.773166
8.20648	0.832788
8.22482	0.794322
8.24316	0.805862
8.26149	0.775089
8.27983	0.748163
8.29817	0.742393
8.3165	0.75201
8.33484	0.753933
8.35318	0.75201
8.37152	0.777013
8.38985	0.702004
8.40819	0.688541
8.42653	0.698157
8.44486	0.671231
8.4632	0.650075
8.48154	0.692388
8.49987	0.713544
8.51821	0.659691
8.53655	0.721237
8.55488	0.682771
8.57322	0.638535
8.59156	0.686618
8.6099	0.705851
8.62823	0.600069
8.64657	0.642382
8.66491	0.642382
8.68324	0.634689
8.70158	0.625072
8.71992	0.584683
8.73825	0.56545
8.75659	0.619302
8.77493	0.596223
8.79326	0.57699
8.8116	0.619302
8.82994	0.642382
8.84828	0.601993
8.86661	0.55391
8.88495	0.534677
8.90329	0.613532
8.92162	0.515444
8.93996	0.586606
8.9583	0.557757
8.97663	0.594299
8.99497	0.55391
9.01331	0.578913
9.03164	0.563527
9.04998	0.603916
9.06832	0.55391
9.08665	0.5366
9.10499	0.525061
9.12333	0.596223
9.14167	0.569296
9.16	0.588529
9.17834	0.484671
9.19668	0.475055
9.21501	0.56545
9.23335	0.496211
9.25169	0.550063
9.27002	0.538524
9.28836	0.555833
9.3067	0.58276
9.32503	0.486595
9.34337	0.546217
9.36171	0.532754
9.38005	0.550063
9.39838	0.55968
9.41672	0.463515
9.43506	0.532754
9.45339	0.519291
9.47173	0.509674
9.49007	0.538524
9.5084	0.496211
9.52674	0.509674
9.54508	0.453899
9.56341	0.478901
9.58175	0.515444
9.60009	0.494288
9.61842	0.463515
9.63676	0.505828
9.6551	0.540447
9.67344	0.507751
9.69177	0.457745
9.71011	0.532754
9.72845	0.426972
9.74678	0.467362
9.76512	0.488518
9.78346	0.519291
9.80179	0.500058
9.82013	0.428896
9.83847	0.442359
9.8568	0.550063
9.87514	0.490441
9.89348	0.494288
9.91182	0.469285
9.93015	0.54237
9.94849	0.513521
9.96683	0.417356
9.98516	0.457745
10.0035	0.480825
10.0218	0.525061
10.0402	0.467362
10.0585	0.411586
10.0768	0.417356
10.0952	0.434666
10.1135	0.417356
10.1319	0.425049
10.1502	0.463515
10.1685	0.448129
10.1869	0.442359
10.2052	0.423126
10.2235	0.407739
10.2419	0.484671
10.2602	0.457745
10.2786	0.438512
10.2969	0.425049
10.3152	0.467362
10.3336	0.480825
10.3519	0.476978
10.3702	0.411586
10.3886	0.461592
10.4069	0.450052
10.4252	0.496211
10.4436	0.488518
10.4619	0.430819
10.4803	0.440435
10.4986	0.450052
10.5169	0.419279
10.5353	0.453899
10.5536	0.461592
10.5719	0.446205
10.5903	0.515444
10.6086	0.440435
10.627	0.388506
10.6453	0.442359
10.6636	0.444282
10.682	0.465438
10.7003	0.459668
10.7186	0.430819
10.737	0.446205
10.7553	0.421202
10.7736	0.426972
10.792	0.432742
10.8103	0.413509
10.8287	0.461592
10.847	0.423126
10.8653	0.442359
10.8837	0.375043
10.902	0.446205
10.9203	0.375043
10.9387	0.392353
10.957	0.423126
10.9754	0.375043
10.9937	0.392353
11.012	0.400046
11.0304	0.467362
11.0487	0.411586
11.067	0.388506
11.0854	0.413509
11.1037	0.392353
11.1221	0.403893
11.1404	0.3962
11.1587	0.3962
11.1771	0.375043
11.1954	0.463515
11.2137	0.425049
11.2321	0.36158
11.2504	0.375043
11.2687	0.37312
11.2871	0.411586
11.3054	0.392353
11.3238	0.386583
11.3421	0.450052
11.3604	0.375043
11.3788	0.398123
11.3971	0.436589
11.4154	0.398123
11.4338	0.428896
11.4521	0.451975
11.4705	0.405816
11.4888	0.35004
11.5071	0.371197
11.5255	0.448129
11.5438	0.426972
11.5621	0.359657
11.5805	0.419279
11.5988	0.421202
11.6171	0.400046
11.6355	0.411586
11.6538	0.442359
11.6722	0.376967
11.6905	0.38466
11.7088	0.426972
11.7272	0.413509
11.7455	0.411586
11.7638	0.36158
11.7822	0.375043
11.8005	0.37312
11.8189	0.407739
11.8372	0.403893
11.8555	0.403893
11.8739	0.403893
11.8922	0.363503
11.9105	0.37312
11.9289	0.39043
11.9472	0.467362
11.9655	0.38466
11.9839	0.369273
12.0022	0.430819
12.0206	0.394276
12.0389	0.37312
12.0572	0.398123
12.0756	0.413509
12.0939	0.450052
12.1122	0.394276
12.1306	0.38466
12.1489	0.434666
12.1673	0.386583
12.1856	0.403893
12.2039	0.446205
12.2223	0.457745
12.2406	0.440435
12.2589	0.451975
12.2773	0.419279
12.2956	0.496211
12.3139	0.401969
12.3323	0.436589
12.3506	0.473132
12.369	0.394276
12.3873	0.436589
12.4056	0.532754
12.424	0.534677
12.4423	0.569296
12.4606	0.590453
12.479	0.617379
12.4973	0.630842
12.5157	0.748163
12.534	0.773166
12.5523	0.74624
12.5707	0.815479
12.589	0.986652
12.6073	1.11551
12.6257	1.20591
12.644	1.35785
12.6624	1.59057
12.6807	1.75597
12.699	2.18102
12.7174	2.36181
12.7357	2.35604
12.754	2.38297
12.7724	2.34835
12.7907	1.96561
12.809	1.61365
12.8274	1.25399
12.8457	0.882794
12.8641	0.700081
12.8824	0.690464
12.9007	0.511597
12.9191	0.563527
12.9374	0.517367
12.9557	0.438512
12.9741	0.465438
12.9924	0.425049
13.0108	0.465438
13.0291	0.398123
13.0474	0.430819
13.0658	0.486595
13.0841	0.423126
13.1024	0.417356
13.1208	0.405816
13.1391	0.340424
13.1574	0.37889
13.1758	0.38466
13.1941	0.353887
13.2125	0.35004
13.2308	0.34427
13.2491	0.303881
13.2675	0.398123
13.2858	0.34427
13.3041	0.357734
13.3225	0.346194
13.3408	0.340424
13.3592	0.342347
13.3775	0.382736
13.3958	0.317344
13.4142	0.351964
13.4325	0.340424
13.4508	0.326961
13.4692	0.353887
13.4875	0.394276
13.5058	0.34427
13.5242	0.35004
13.5425	0.340424
13.5609	0.34427
13.5792	0.375043
13.5975	0.332731
13.6159	0.330807
13.6342	0.380813
13.6525	0.380813
13.6709	0.39043
13.6892	0.388506
13.7076	0.334654
13.7259	0.35581
13.7442	0.363503
13.7626	0.340424
13.7809	0.336577
13.7992	0.342347
13.8176	0.363503
13.8359	0.365427
13.8542	0.388506
13.8726	0.351964
13.8909	0.357734
13.9093	0.36735
13.9276	0.332731
13.9459	0.300035
13.9643	0.353887
13.9826	0.38466
14.0009	0.328884
14.0193	0.35581
14.0376	0.346194
14.056	0.334654
14.0743	0.336577
14.0926	0.319268
14.111	0.382736
14.1293	0.323114
14.1476	0.392353
14.166	0.35004
14.1843	0.351964
14.2026	0.39043
14.221	0.315421
14.2393	0.338501
14.2577	0.301958
14.276	0.330807
14.2943	0.334654
14.3127	0.340424
14.331	0.371197
14.3493	0.348117
14.3677	0.365427
14.386	0.403893
14.4044	0.417356
14.4227	0.394276
14.441	0.386583
14.4594	0.375043
14.4777	0.380813
14.496	0.376967
14.5144	0.353887
14.5327	0.442359
14.5511	0.401969
14.5694	0.37312
14.5877	0.409663
14.6061	0.388506
14.6244	0.465438
14.6427	0.403893
14.6611	0.428896
14.6794	0.442359
14.6977	0.451975
14.7161	0.513521
14.7344	0.453899
14.7528	0.444282
14.7711	0.409663
14.7894	0.428896
14.8078	0.380813
14.8261	0.35004
14.8444	0.332731
14.8628	0.328884
14.8811	0.332731
14.8995	0.363503
14.9178	0.35004
14.9361	0.380813
14.9545	0.323114
14.9728	0.353887
14.9911	0.365427
15.0095	0.34427
15.0278	0.36735
15.0461	0.317344
15.0645	0.300035
15.0828	0.340424
15.1012	0.323114
15.1195	0.36158
15.1378	0.388506
15.1562	0.39043
15.1745	0.380813
15.1928	0.35581
15.2112	0.340424
15.2295	0.365427
15.2479	0.357734
15.2662	0.323114
15.2845	0.338501
15.3029	0.346194
15.3212	0.321191
15.3395	0.35004
15.3579	0.35004
15.3762	0.35581
15.3945	0.278878
15.4129	0.365427
15.4312	0.305805
15.4496	0.394276
15.4679	0.342347
15.4862	0.37312
15.5046	0.340424
15.5229	0.398123
15.5412	0.35581
15.5596	0.357734
15.5779	0.346194
15.5963	0.37889
15.6146	0.34427
15.6329	0.394276
15.6513	0.417356
15.6696	0.3962
15.6879	0.386583
15.7063	0.37889
15.7246	0.432742
15.7429	0.486595
15.7613	0.451975
15.7796	0.473132
15.798	0.453899
15.8163	0.501981
15.8346	0.55968
15.853	0.58276
15.8713	0.592376
15.8896	0.626995
15.908	0.621226
15.9263	0.709697
15.9447	0.72316
15.963	0.72316
15.9813	0.677001
15.9997	0.680848
16.018	0.651998
16.0363	0.678924
16.0547	0.615456
16.073	0.590453
16.0914	0.507751
16.1097	0.482748
16.128	0.475055
16.1464	0.471208
16.1647	0.409663
16.183	0.419279
16.2014	0.400046
16.2197	0.421202
16.238	0.35581
16.2564	0.371197
16.2747	0.400046
16.2931	0.342347
16.3114	0.37889
16.3297	0.334654
16.3481	0.288495
16.3664	0.36735
16.3847	0.336577
16.4031	0.323114
16.4214	0.380813
16.4398	0.332731
16.4581	0.382736
16.4764	0.35581
16.4948	0.38466
16.5131	0.332731
16.5314	0.315421
16.5498	0.290418
16.5681	0.323114
16.5864	0.340424
16.6048	0.330807
16.6231	0.37312
16.6415	0.376967
16.6598	0.37312
16.6781	0.34427
16.6965	0.342347
16.7148	0.365427
16.7331	0.36158
16.7515	0.317344
16.7698	0.392353
16.7882	0.353887
16.8065	0.400046
16.8248	0.369273
16.8432	0.359657
16.8615	0.363503
16.8798	0.330807
16.8982	0.376967
16.9165	0.38466
16.9348	0.351964
16.9532	0.336577
16.9715	0.35581
16.9899	0.348117
17.0082	0.386583
17.0265	0.346194
17.0449	0.386583
17.0632	0.386583
17.0815	0.34427
17.0999	0.369273
17.1182	0.37312
17.1366	0.411586
17.1549	0.359657
17.1732	0.371197
17.1916	0.363503
17.2099	0.382736
17.2282	0.376967
17.2466	0.392353
17.2649	0.375043
17.2832	0.400046
17.3016	0.451975
17.3199	0.436589
17.3383	0.438512
17.3566	0.365427
17.3749	0.425049
17.3933	0.526984
17.4116	0.457745
17.4299	0.482748
17.4483	0.525061
17.4666	0.573143
17.485	0.555833
17.5033	0.57122
17.5216	0.601993
17.54	0.696234
17.5583	0.698157
17.5766	0.702004
17.595	0.727007
17.6133	0.648152
17.6316	0.732777
17.65	0.688541
17.6683	0.632765
17.6867	0.617379
17.705	0.578913
17.7233	0.555833
17.7417	0.511597
17.76	0.480825
17.7783	0.494288
17.7967	0.484671
17.815	0.444282
17.8334	0.475055
17.8517	0.417356
17.87	0.440435
17.8884	0.394276
17.9067	0.417356
17.925	0.423126
17.9434	0.434666
17.9617	0.415433
17.9801	0.469285
17.9984	0.444282
18.0167	0.457745
18.0351	0.463515
18.0534	0.523137
18.0717	0.455822
18.0901	0.492365
18.1084	0.467362
18.1267	0.450052
18.1451	0.450052
18.1634	0.36158
18.1818	0.503904
18.2001	0.442359
18.2184	0.448129
18.2368	0.411586
18.2551	0.417356
18.2734	0.476978
18.2918	0.403893
18.3101	0.405816
18.3285	0.423126
18.3468	0.430819
18.3651	0.392353
18.3835	0.401969
18.4018	0.417356
18.4201	0.425049
18.4385	0.376967
18.4568	0.457745
18.4751	0.407739
18.4935	0.369273
18.5118	0.440435
18.5302	0.455822
18.5485	0.382736
18.5668	0.419279
18.5852	0.446205
18.6035	0.398123
18.6218	0.421202
18.6402	0.453899
18.6585	0.473132
18.6769	0.440435
18.6952	0.430819
18.7135	0.465438
18.7319	0.446205
18.7502	0.463515
18.7685	0.394276
18.7869	0.475055
18.8052	0.448129
18.8235	0.469285
18.8419	0.440435
18.8602	0.467362
18.8786	0.492365
18.8969	0.505828
18.9152	0.473132
18.9336	0.476978
18.9519	0.471208
18.9702	0.521214
18.9886	0.513521
19.0069	0.507751
19.0253	0.561603
19.0436	0.517367
19.0619	0.546217
19.0803	0.584683
19.0986	0.623149
19.1169	0.626995
19.1353	0.671231
19.1536	0.688541
19.1719	0.736623
19.1903	0.76355
19.2086	0.880871
19.227	0.894334
19.2453	1.00589
19.2636	1.00781
19.282	1.10013
19.3003	1.29053
19.3186	1.3867
19.337	1.61365
19.3553	1.90407
19.3737	2.13102
19.392	2.47913
19.4103	3.07728
19.4287	3.7312
19.447	4.4332
19.4653	5.54487
19.4837	6.37958
19.502	7.28546
19.5204	7.8913
19.5387	8.24711
19.557	8.07016
19.5754	7.01235
19.5937	5.83337
19.612	4.85056
19.6304	3.83506
19.6487	2.94842
19.667	2.31181
19.6854	1.82521
19.7037	1.43286
19.7221	1.32515
19.7404	1.14436
19.7587	0.988576
19.7771	0.967419
19.7954	0.767396
19.8137	0.771243
19.8321	0.727007
19.8504	0.663538
19.8688	0.682771
19.8871	0.663538
19.9054	0.653922
19.9238	0.657768
19.9421	0.640459
19.9604	0.563527
19.9788	0.54814
19.9971	0.594299
20.0154	0.515444
20.0338	0.503904
20.0521	0.519291
20.0705	0.465438
20.0888	0.55968
20.1071	0.561603
20.1255	0.5366
20.1438	0.484671
20.1621	0.475055
20.1805	0.5366
20.1988	0.515444
20.2172	0.482748
20.2355	0.498134
20.2538	0.428896
20.2722	0.482748
20.2905	0.521214
20.3088	0.5366
20.3272	0.503904
20.3455	0.496211
20.3638	0.498134
20.3822	0.448129
20.4005	0.469285
20.4189	0.538524
20.4372	0.492365
20.4555	0.478901
20.4739	0.488518
20.4922	0.484671
20.5105	0.511597
20.5289	0.467362
20.5472	0.509674
20.5656	0.475055
20.5839	0.557757
20.6022	0.496211
20.6206	0.54237
20.6389	0.521214
20.6572	0.507751
20.6756	0.54237
20.6939	0.55968
20.7122	0.521214
20.7306	0.532754
20.7489	0.517367
20.7673	0.523137
20.7856	0.478901
20.8039	0.476978
20.8223	0.575066
20.8406	0.621226
20.8589	0.580836
20.8773	0.54237
20.8956	0.607762
20.914	0.54814
20.9323	0.621226
20.9506	0.592376
20.969	0.600069
20.9873	0.623149
21.0056	0.528907
21.024	0.57699
21.0423	0.56545
21.0607	0.600069
21.079	0.546217
21.0973	0.56545
21.1157	0.578913
21.134	0.600069
21.1523	0.525061
21.1707	0.511597
21.189	0.54237
21.2073	0.538524
21.2257	0.632765
21.244	0.538524
21.2624	0.546217
21.2807	0.513521
21.299	0.557757
21.3174	0.563527
21.3357	0.584683
21.354	0.538524
21.3724	0.655845
21.3907	0.592376
21.4091	0.638535
21.4274	0.657768
21.4457	0.727007
21.4641	0.7347
21.4824	0.788553
21.5007	0.794322
21.5191	0.857791
21.5374	0.873178
21.5557	0.965496
21.5741	1.0732
21.5924	1.2136
21.6108	1.28476
21.6291	1.42516
21.6474	1.60595
21.6658	1.72905
21.6841	1.9733
21.7024	2.19448
21.7208	2.50798
21.7391	2.76378
21.7575	2.93303
21.7758	3.09843
21.7941	3.17921
21.8125	3.1119
21.8308	2.85995
21.8491	2.67723
21.8675	2.42143
21.8858	2.10986
21.9041	1.88483
21.9225	1.70981
21.9408	1.54826
21.9592	1.46171
21.9775	1.28092
21.9958	1.30015
22.0142	1.15783
22.0325	1.11551
22.0508	1.10397
22.0692	1.14052
22.0875	1.10782
22.1059	1.17321
22.1242	1.33862
22.1425	1.42516
22.1609	1.37901
22.1792	1.54056
22.1975	1.5848
22.2159	1.50017
22.2342	1.38093
22.2525	1.26361
22.2709	1.28669
22.2892	1.0405
22.3076	0.975113
22.3259	0.861638
22.3442	0.875101
22.3626	0.855868
22.3809	0.690464
22.3992	0.750087
22.4176	0.773166
22.4359	0.698157
22.4543	0.661615
22.4726	0.603916
22.4909	0.58276
22.5093	0.525061
22.5276	0.526984
22.5459	0.54237
22.5643	0.463515
22.5826	0.446205
22.6009	0.503904
22.6193	0.523137
22.6376	0.492365
22.656	0.453899
22.6743	0.463515
22.6926	0.446205
22.711	0.451975
22.7293	0.451975
22.7476	0.507751
22.766	0.438512
22.7843	0.459668
22.8027	0.440435
22.821	0.451975
22.8393	0.3962
22.8577	0.432742
22.876	0.417356
22.8943	0.469285
22.9127	0.438512
22.931	0.444282
22.9494	0.438512
22.9677	0.451975
22.986	0.436589
23.0044	0.432742
23.0227	0.37889
23.041	0.371197
23.0594	0.451975
23.0777	0.436589
23.096	0.409663
23.1144	0.478901
23.1327	0.453899
23.1511	0.444282
23.1694	0.469285
23.1877	0.421202
23.2061	0.438512
23.2244	0.423126
23.2427	0.436589
23.2611	0.463515
23.2794	0.484671
23.2978	0.492365
23.3161	0.465438
23.3344	0.496211
23.3528	0.496211
23.3711	0.494288
23.3894	0.478901
23.4078	0.473132
23.4261	0.488518
23.4444	0.469285
23.4628	0.526984
23.4811	0.540447
23.4995	0.471208
23.5178	0.488518
23.5361	0.448129
23.5545	0.501981
23.5728	0.417356
23.5911	0.453899
23.6095	0.451975
23.6278	0.421202
23.6462	0.401969
23.6645	0.419279
23.6828	0.434666
23.7012	0.465438
23.7195	0.446205
23.7378	0.386583
23.7562	0.465438
23.7745	0.394276
23.7928	0.436589
23.8112	0.428896
23.8295	0.417356
23.8479	0.461592
23.8662	0.461592
23.8845	0.473132
23.9029	0.517367
23.9212	0.417356
23.9395	0.486595
23.9579	0.496211
23.9762	0.528907
23.9946	0.596223
24.0129	0.646228
24.0312	0.557757
24.0496	0.669308
24.0679	0.711621
24.0862	0.802016
24.1046	0.892411
24.1229	0.978959
24.1412	1.03089
24.1596	1.01935
24.1779	1.17321
24.1963	1.2463
24.2146	1.22514
24.2329	1.07512
24.2513	1.12705
24.2696	1.08474
24.2879	0.873178
24.3063	0.9328
24.3246	0.852021
24.343	0.755856
24.3613	0.75201
24.3796	0.755856
24.398	0.623149
24.4163	0.684694
24.4346	0.607762
24.453	0.584683
24.4713	0.561603
24.4897	0.557757
24.508	0.575066
24.5263	0.540447
24.5447	0.573143
24.563	0.611609
24.5813	0.586606
24.5997	0.590453
24.618	0.544294
24.6363	0.563527
24.6547	0.640459
24.673	0.511597
24.6914	0.515444
24.7097	0.578913
24.728	0.488518
24.7464	0.494288
24.7647	0.496211
24.783	0.417356
24.8014	0.457745
24.8197	0.436589
24.8381	0.436589
24.8564	0.444282
24.8747	0.376967
24.8931	0.419279
24.9114	0.432742
24.9297	0.36158
24.9481	0.380813
24.9664	0.403893
24.9847	0.35581
25.0031	0.332731
25.0214	0.37312
25.0398	0.357734
25.0581	0.348117
25.0764	0.375043
25.0948	0.340424
25.1131	0.336577
25.1314	0.315421
25.1498	0.357734
25.1681	0.365427
25.1865	0.365427
25.2048	0.321191
25.2231	0.294265
25.2415	0.321191
25.2598	0.342347
25.2781	0.317344
25.2965	0.313498
25.3148	0.328884
25.3331	0.280802
25.3515	0.363503
25.3698	0.342347
25.3882	0.37312
25.4065	0.346194
25.4248	0.35581
25.4432	0.34427
25.4615	0.388506
25.4798	0.36735
25.4982	0.380813
25.5165	0.376967
25.5349	0.425049
25.5532	0.369273
25.5715	0.363503
25.5899	0.423126
25.6082	0.428896
25.6265	0.415433
25.6449	0.438512
25.6632	0.478901
25.6815	0.459668
25.6999	0.475055
25.7182	0.469285
25.7366	0.476978
25.7549	0.521214
25.7732	0.513521
25.7916	0.440435
25.8099	0.453899
25.8282	0.532754
25.8466	0.459668
25.8649	0.432742
25.8833	0.413509
25.9016	0.444282
25.9199	0.386583
25.9383	0.388506
25.9566	0.413509
25.9749	0.334654
25.9933	0.371197
26.0116	0.357734
26.0299	0.363503
26.0483	0.296188
26.0666	0.290418
26.085	0.338501
26.1033	0.330807
26.1216	0.357734
26.14	0.326961
26.1583	0.294265
26.1766	0.298111
26.195	0.325038
26.2133	0.351964
26.2317	0.315421
26.25	0.305805
26.2683	0.365427
26.2867	0.351964
26.305	0.326961
26.3233	0.300035
26.3417	0.328884
26.36	0.300035
26.3784	0.300035
26.3967	0.319268
26.415	0.334654
26.4334	0.353887
26.4517	0.307728
26.47	0.315421
26.4884	0.315421
26.5067	0.3962
26.525	0.338501
26.5434	0.36735
26.5617	0.38466
26.5801	0.35581
26.5984	0.3962
26.6167	0.407739
26.6351	0.417356
26.6534	0.421202
26.6717	0.436589
26.6901	0.461592
26.7084	0.496211
26.7268	0.500058
26.7451	0.526984
26.7634	0.525061
26.7818	0.569296
26.8001	0.519291
26.8184	0.488518
26.8368	0.526984
26.8551	0.501981
26.8734	0.461592
26.8918	0.465438
26.9101	0.392353
26.9285	0.434666
26.9468	0.425049
26.9651	0.425049
26.9835	0.365427
27.0018	0.380813
27.0201	0.388506
27.0385	0.417356
27.0568	0.405816
27.0752	0.388506
27.0935	0.348117
27.1118	0.405816
27.1302	0.413509
27.1485	0.394276
27.1668	0.411586
27.1852	0.440435
27.2035	0.440435
27.2218	0.528907
27.2402	0.532754
27.2585	0.482748
27.2769	0.54237
27.2952	0.557757
27.3135	0.703927
27.3319	0.730854
27.3502	0.784706
27.3685	0.828942
27.3869	0.917414
27.4052	0.971266
27.4236	1.03281
27.4419	1.12898
27.4602	1.07897
27.4786	1.04243
27.4969	0.975113
27.5152	0.994345
27.5336	0.886641
27.5519	0.877024
27.5702	0.798169
27.5886	0.682771
27.6069	0.692388
27.6253	0.621226
27.6436	0.651998
27.6619	0.563527
27.6803	0.526984
27.6986	0.480825
27.7169	0.482748
27.7353	0.442359
27.7536	0.494288
27.772	0.425049
27.7903	0.446205
27.8086	0.392353
27.827	0.440435
27.8453	0.428896
27.8636	0.469285
27.882	0.401969
27.9003	0.37889
27.9187	0.36735
27.937	0.369273
27.9553	0.36158
27.9737	0.411586
27.992	0.386583
28.0103	0.403893
28.0287	0.401969
28.047	0.375043
28.0653	0.35004
28.0837	0.359657
28.102	0.375043
28.1204	0.37312
28.1387	0.359657
28.157	0.434666
28.1754	0.434666
28.1937	0.432742
28.212	0.438512
28.2304	0.475055
28.2487	0.453899
28.2671	0.482748
28.2854	0.523137
28.3037	0.58276
28.3221	0.669308
28.3404	0.713544
28.3587	0.755856
28.3771	0.853945
28.3954	0.93857
28.4137	0.992422
28.4321	1.07705
28.4504	1.11551
28.4688	1.04627
28.4871	1.15783
28.5054	1.04243
28.5238	0.871254
28.5421	0.925107
28.5604	0.815479
28.5788	0.659691
28.5971	0.625072
28.6155	0.578913
28.6338	0.58276
28.6521	0.492365
28.6705	0.525061
28.6888	0.476978
28.7071	0.392353
28.7255	0.444282
28.7438	0.3962
28.7621	0.461592
28.7805	0.428896
28.7988	0.400046
28.8172	0.37312
28.8355	0.35004
28.8538	0.375043
28.8722	0.35004
28.8905	0.330807
28.9088	0.328884
28.9272	0.300035
28.9455	0.309651
28.9639	0.326961
28.9822	0.323114
29.0005	0.282725
29.0189	0.330807
29.0372	0.280802
29.0555	0.271185
29.0739	0.280802
29.0922	0.300035
29.1105	0.309651
29.1289	0.238489
29.1472	0.278878
29.1656	0.319268
29.1839	0.273108
29.2022	0.238489
29.2206	0.250029
29.2389	0.275032
29.2572	0.309651
29.2756	0.321191
29.2939	0.259645
29.3123	0.219256
29.3306	0.257722
29.3489	0.261569
29.3673	0.288495
29.3856	0.321191
29.4039	0.294265
29.4223	0.278878
29.4406	0.303881
29.459	0.298111
29.4773	0.340424
29.4956	0.300035
29.514	0.309651
29.5323	0.298111
29.5506	0.271185
29.569	0.280802
29.5873	0.305805
29.6056	0.288495
29.624	0.301958
29.6423	0.284648
29.6607	0.286572
29.679	0.288495
29.6973	0.273108
29.7157	0.315421
29.734	0.315421
29.7523	0.357734
29.7707	0.261569
29.789	0.328884
29.8074	0.35004
29.8257	0.330807
29.844	0.300035
29.8624	0.278878
29.8807	0.296188
29.899	0.321191
29.9174	0.284648
29.9357	0.290418
29.954	0.278878
29.9724	0.257722
29.9907	0.232719
30.0091	0.267339
30.0274	0.215409
30.0457	0.263492
30.0641	0.244259
30.0824	0.246182
30.1007	0.234642
30.1191	0.230796
30.1374	0.230796
30.1558	0.244259
30.1741	0.232719
30.1924	0.228873
30.2108	0.215409
30.2291	0.207716
30.2474	0.226949
30.2658	0.255799
30.2841	0.228873
30.3024	0.219256
30.3208	0.232719
30.3391	0.236566
30.3575	0.251952
30.3758	0.269262
30.3941	0.228873
30.4125	0.18656
30.4308	0.213486
30.4491	0.217333
30.4675	0.251952
30.4858	0.234642
30.5042	0.242336
30.5225	0.20387
30.5408	0.259645
30.5592	0.261569
30.5775	0.234642
30.5958	0.223103
30.6142	0.219256
30.6325	0.276955
30.6508	0.286572
30.6692	0.236566
30.6875	0.251952
30.7059	0.267339
30.7242	0.275032
30.7425	0.248106
30.7609	0.273108
30.7792	0.253875
30.7975	0.251952
30.8159	0.219256
30.8342	0.240412
30.8526	0.261569
30.8709	0.251952
30.8892	0.213486
30.9076	0.265415
30.9259	0.305805
30.9442	0.234642
30.9626	0.284648
30.9809	0.234642
30.9992	0.223103
31.0176	0.257722
31.0359	0.259645
31.0543	0.271185
31.0726	0.284648
31.0909	0.234642
31.1093	0.263492
31.1276	0.267339
31.1459	0.255799
31.1643	0.332731
31.1826	0.300035
31.201	0.276955
31.2193	0.357734
31.2376	0.380813
31.256	0.407739
31.2743	0.369273
31.2926	0.38466
31.311	0.365427
31.3293	0.37312
31.3477	0.382736
31.366	0.413509
31.3843	0.371197
31.4027	0.348117
31.421	0.296188
31.4393	0.380813
31.4577	0.301958
31.476	0.369273
31.4943	0.328884
31.5127	0.375043
31.531	0.313498
31.5494	0.313498
31.5677	0.348117
31.586	0.319268
31.6044	0.340424
31.6227	0.376967
31.641	0.263492
31.6594	0.303881
31.6777	0.35004
31.6961	0.255799
31.7144	0.257722
31.7327	0.282725
31.7511	0.246182
31.7694	0.267339
31.7877	0.1981
31.8061	0.236566
31.8244	0.263492
31.8427	0.236566
31.8611	0.246182
31.8794	0.215409
31.8978	0.236566
31.9161	0.17502
31.9344	0.188483
31.9528	0.196176
31.9711	0.236566
31.9894	0.217333
32.0078	0.194253
32.0261	0.230796
32.0445	0.251952
32.0628	0.232719
32.0811	0.230796
32.0995	0.238489
32.1178	0.217333
32.1361	0.232719
32.1545	0.219256
32.1728	0.20964
32.1911	0.242336
32.2095	0.205793
32.2278	0.273108
32.2462	0.240412
32.2645	0.236566
32.2828	0.226949
32.3012	0.242336
32.3195	0.251952
32.3378	0.18656
32.3562	0.242336
32.3745	0.271185
32.3929	0.305805
32.4112	0.269262
32.4295	0.267339
32.4479	0.240412
32.4662	0.275032
32.4845	0.292341
32.5029	0.317344
32.5212	0.286572
32.5395	0.228873
32.5579	0.319268
32.5762	0.278878
32.5946	0.278878
32.6129	0.276955
32.6312	0.292341
32.6496	0.311574
32.6679	0.265415
32.6862	0.257722
32.7046	0.259645
32.7229	0.242336
32.7413	0.244259
32.7596	0.248106
32.7779	0.253875
32.7963	0.240412
32.8146	0.242336
32.8329	0.261569
32.8513	0.236566
32.8696	0.215409
32.888	0.226949
32.9063	0.207716
32.9246	0.184637
32.943	0.213486
32.9613	0.219256
32.9796	0.219256
32.998	0.211563
33.0163	0.230796
33.0346	0.269262
33.053	0.20387
33.0713	0.207716
33.0897	0.20964
33.108	0.261569
33.1263	0.223103
33.1447	0.250029
33.163	0.230796
33.1813	0.238489
33.1997	0.200023
33.218	0.201946
33.2364	0.228873
33.2547	0.226949
33.273	0.240412
33.2914	0.244259
33.3097	0.221179
33.328	0.215409
33.3464	0.213486
33.3647	0.213486
33.383	0.234642
33.4014	0.253875
33.4197	0.223103
33.4381	0.205793
33.4564	0.205793
33.4747	0.217333
33.4931	0.225026
33.5114	0.225026
33.5297	0.226949
33.5481	0.269262
33.5664	0.225026
33.5848	0.217333
33.6031	0.284648
33.6214	0.263492
33.6398	0.251952
33.6581	0.325038
33.6764	0.240412
33.6948	0.288495
33.7131	0.301958
33.7314	0.330807
33.7498	0.36735
33.7681	0.348117
33.7865	0.35581
33.8048	0.403893
33.8231	0.480825
33.8415	0.457745
33.8598	0.467362
33.8781	0.573143
33.8965	0.611609
33.9148	0.659691
33.9332	0.650075
33.9515	0.609686
33.9698	0.55391
33.9882	0.532754
34.0065	0.507751
34.0248	0.505828
34.0432	0.425049
34.0615	0.467362
34.0798	0.35004
34.0982	0.357734
34.1165	0.338501
34.1349	0.326961
34.1532	0.265415
34.1715	0.273108
34.1899	0.259645
34.2082	0.292341
34.2265	0.309651
34.2449	0.271185
34.2632	0.232719
34.2816	0.265415
34.2999	0.1981
34.3182	0.196176
34.3366	0.200023
34.3549	0.230796
34.3732	0.230796
34.3916	0.236566
34.4099	0.228873
34.4282	0.246182
34.4466	0.217333
34.4649	0.190407
34.4833	0.246182
34.5016	0.182713
34.5199	0.207716
34.5383	0.194253
34.5566	0.20964
34.5749	0.20387
34.5933	0.1981
34.6116	0.184637
34.63	0.251952
34.6483	0.20964
34.6666	0.236566
34.685	0.16348
34.7033	0.230796
34.7216	0.18656
34.74	0.236566
34.7583	0.184637
34.7767	0.161557
34.795	0.196176
34.8133	0.223103
34.8317	0.18656
34.85	0.201946
34.8683	0.171174
34.8867	0.200023
34.905	0.201946
34.9233	0.205793
34.9417	0.230796
34.96	0.18656
34.9784	0.219256
34.9967	0.253875
35.015	0.200023
35.0334	0.171174
35.0517	0.215409
35.07	0.18656
35.0884	0.225026
35.1067	0.228873
35.1251	0.251952
35.1434	0.223103
35.1617	0.205793
35.1801	0.205793
35.1984	0.20964
35.2167	0.232719
35.2351	0.18656
35.2534	0.167327
35.2717	0.242336
35.2901	0.230796
35.3084	0.228873
35.3268	0.261569
35.3451	0.255799
35.3634	0.257722
35.3818	0.259645
35.4001	0.273108
35.4184	0.284648
35.4368	0.342347
35.4551	0.282725
35.4735	0.319268
35.4918	0.36158
35.5101	0.398123
35.5285	0.407739
35.5468	0.36735
35.5651	0.394276
35.5835	0.478901
35.6018	0.428896
35.6201	0.428896
35.6385	0.428896
35.6568	0.380813
35.6752	0.359657
35.6935	0.369273
35.7118	0.315421
35.7302	0.325038
35.7485	0.325038
35.7668	0.348117
35.7852	0.305805
35.8035	0.273108
35.8219	0.269262
35.8402	0.261569
35.8585	0.282725
35.8769	0.288495
35.8952	0.246182
35.9135	0.255799
35.9319	0.232719
35.9502	0.263492
35.9685	0.19233
35.9869	0.244259
36.0052	0.255799
36.0236	0.196176
36.0419	0.230796
36.0602	0.184637
36.0786	0.221179
36.0969	0.20387
36.1152	0.217333
36.1336	0.207716
36.1519	0.200023
36.1703	0.217333
36.1886	0.20964
36.2069	0.20387
36.2253	0.194253
36.2436	0.230796
36.2619	0.1981
36.2803	0.226949
36.2986	0.20387
36.317	0.182713
36.3353	0.205793
36.3536	0.232719
36.372	0.207716
36.3903	0.201946
36.4086	0.205793
36.427	0.223103
36.4453	0.184637
36.4636	0.17502
36.482	0.157711
36.5003	0.167327
36.5187	0.20964
36.537	0.240412
36.5553	0.223103
36.5737	0.1981
36.592	0.240412
36.6103	0.226949
36.6287	0.255799
36.647	0.236566
36.6654	0.251952
36.6837	0.225026
36.702	0.234642
36.7204	0.230796
36.7387	0.228873
36.757	0.242336
36.7754	0.196176
36.7937	0.234642
36.812	0.225026
36.8304	0.20387
36.8487	0.223103
36.8671	0.211563
36.8854	0.196176
36.9037	0.190407
36.9221	0.201946
36.9404	0.176943
36.9587	0.188483
36.9771	0.134631
36.9954	0.194253
37.0138	0.18656
37.0321	0.18656
37.0504	0.167327
37.0688	0.200023
37.0871	0.223103
37.1054	0.182713
37.1238	0.178867
37.1421	0.223103
37.1604	0.215409
37.1788	0.188483
37.1971	0.211563
37.2155	0.173097
37.2338	0.182713
37.2521	0.171174
37.2705	0.167327
37.2888	0.171174
37.3071	0.223103
37.3255	0.219256
37.3438	0.219256
37.3622	0.213486
37.3805	0.201946
37.3988	0.182713
37.4172	0.196176
37.4355	0.18656
37.4538	0.16925
37.4722	0.184637
37.4905	0.161557
37.5088	0.190407
37.5272	0.201946
37.5455	0.17502
37.5639	0.19233
37.5822	0.219256
37.6005	0.217333
37.6189	0.171174
37.6372	0.16348
37.6555	0.184637
37.6739	0.182713
37.6922	0.1981
37.7106	0.20387
37.7289	0.184637
37.7472	0.176943
37.7656	0.16348
37.7839	0.167327
37.8022	0.19233
37.8206	0.194253
37.8389	0.17502
37.8573	0.200023
37.8756	0.151941
37.8939	0.188483
37.9123	0.190407
37.9306	0.190407
37.9489	0.188483
37.9673	0.188483
37.9856	0.150017
38.0039	0.18656
38.0223	0.184637
38.0406	0.17502
38.059	0.200023
38.0773	0.176943
38.0956	0.190407
38.114	0.16925
38.1323	0.178867
38.1506	0.190407
38.169	0.205793
38.1873	0.167327
38.2057	0.20387
38.224	0.1981
38.2423	0.20387
38.2607	0.176943
38.279	0.20387
38.2973	0.17502
38.3157	0.176943
38.334	0.173097
38.3523	0.167327
38.3707	0.194253
38.389	0.178867
38.4074	0.194253
38.4257	0.236566
38.444	0.18656
38.4624	0.205793
38.4807	0.217333
38.499	0.182713
38.5174	0.17502
38.5357	0.16925
38.5541	0.200023
38.5724	0.19233
38.5907	0.200023
38.6091	0.207716
38.6274	0.211563
38.6457	0.196176
38.6641	0.20387
38.6824	0.18079
38.7007	0.188483
38.7191	0.20387
38.7374	0.178867
38.7558	0.230796
38.7741	0.196176
38.7924	0.211563
38.8108	0.257722
38.8291	0.221179
38.8474	0.242336
38.8658	0.257722
38.8841	0.236566
38.9025	0.228873
38.9208	0.251952
38.9391	0.265415
38.9575	0.265415
38.9758	0.248106
38.9941	0.259645
39.0125	0.232719
39.0308	0.255799
39.0491	0.236566
39.0675	0.232719
39.0858	0.280802
39.1042	0.263492
39.1225	0.207716
39.1408	0.20387
39.1592	0.190407
39.1775	0.223103
39.1958	0.248106
39.2142	0.182713
39.2325	0.194253
39.2509	0.207716
39.2692	0.215409
39.2875	0.223103
39.3059	0.236566
39.3242	0.182713
39.3425	0.265415
39.3609	0.217333
39.3792	0.176943
39.3975	0.225026
39.4159	0.230796
39.4342	0.184637
39.4526	0.213486
39.4709	0.238489
39.4892	0.238489
39.5076	0.221179
39.5259	0.267339
39.5442	0.223103
39.5626	0.280802
39.5809	0.267339
39.5993	0.259645
39.6176	0.246182
39.6359	0.311574
39.6543	0.298111
39.6726	0.290418
39.6909	0.311574
39.7093	0.348117
39.7276	0.325038
39.746	0.278878
39.7643	0.265415
39.7826	0.259645
39.801	0.20964
39.8193	0.267339
39.8376	0.230796
39.856	0.211563
39.8743	0.248106
39.8926	0.255799
39.911	0.211563
39.9293	0.213486
39.9477	0.19233
39.966	0.226949
39.9843	0.20964
40.0027	0.196176
40.021	0.211563
40.0393	0.228873
40.0577	0.213486
40.076	0.259645
40.0944	0.255799
40.1127	0.286572
40.131	0.213486
40.1494	0.236566
40.1677	0.248106
40.186	0.232719
40.2044	0.228873
40.2227	0.257722
40.241	0.263492
40.2594	0.261569
40.2777	0.17502
40.2961	0.244259
40.3144	0.223103
40.3327	0.201946
40.3511	0.223103
40.3694	0.240412
40.3877	0.226949
40.4061	0.234642
40.4244	0.213486
40.4428	0.19233
40.4611	0.250029
40.4794	0.211563
40.4978	0.205793
40.5161	0.232719
40.5344	0.219256
[truncated: 1,056 more rows]

## Sheet: Cooling 115 °C
2theta	Intensity
3.89731	1.48479
3.91565	1.51364
3.93399	1.47517
3.95232	1.40785
3.97066	1.4367
3.989	1.39631
4.00733	1.48286
4.02567	1.45594
4.04401	1.45594
4.06234	1.40593
4.08068	1.38093
4.09902	1.35016
4.11735	1.49248
4.13569	1.37708
4.15403	1.34823
4.17237	1.41555
4.1907	1.29823
4.20904	1.38093
4.22738	1.4117
4.24571	1.38285
4.26405	1.42324
4.28239	1.36554
4.30072	1.42516
4.31906	1.2386
4.3374	1.28092
4.35573	1.34246
4.37407	1.27899
4.39241	1.35208
4.41075	1.28861
4.42908	1.26361
4.44742	1.40208
4.46576	1.25399
4.48409	1.28284
4.50243	1.32708
4.52077	1.26553
4.5391	1.32323
4.55744	1.24053
4.57578	1.18668
4.59411	1.14244
4.61245	1.12513
4.63079	1.27322
4.64913	1.25591
4.66746	1.22706
4.6858	1.23476
4.70414	1.1309
4.72247	1.10397
4.74081	1.14821
4.75915	1.28284
4.77748	1.22899
4.79582	1.23091
4.81416	1.20014
4.83249	1.16744
4.85083	1.20399
4.86917	1.26168
4.8875	1.23283
4.90584	1.14821
4.92418	1.18091
4.94252	1.18283
4.96085	1.20206
4.97919	1.23668
4.99753	1.13859
5.01586	1.1559
5.0342	1.22706
5.05254	1.1309
5.07087	1.15013
5.08921	1.1886
5.10755	1.07512
5.12588	1.13475
5.14422	1.04627
5.16256	1.02704
5.1809	1.09243
5.19923	1.15398
5.21757	1.17898
5.23591	1.16552
5.25424	1.15206
5.27258	1.12321
5.29092	1.11936
5.30925	1.14629
5.32759	1.13667
5.34593	1.08474
5.36426	1.18668
5.3826	1.0732
5.40094	1.07128
5.41927	1.10782
5.43761	1.13282
5.45595	1.17321
5.47429	1.07128
5.49262	1.17129
5.51096	1.22706
5.5293	1.12705
5.54763	1.13667
5.56597	1.15013
5.58431	1.20014
5.60264	1.15975
5.62098	1.1636
5.63932	1.18091
5.65765	1.18091
5.67599	1.02512
5.69433	1.18091
5.71267	1.19052
5.731	1.02319
5.74934	1.12705
5.76768	1.18283
5.78601	1.10013
5.80435	1.18475
5.82269	1.20591
5.84102	1.20591
5.85936	1.23283
5.8777	1.25014
5.89603	1.22322
5.91437	1.15206
5.93271	1.18668
5.95104	1.29438
5.96938	1.35016
5.98772	1.26168
6.00606	1.27322
6.02439	1.24245
6.04273	1.27707
6.06107	1.3867
6.0794	1.4367
6.09774	1.41939
6.11608	1.36939
6.13441	1.43863
6.15275	1.47902
6.17109	1.44824
6.18942	1.55595
6.20776	1.53095
6.2261	1.60403
6.24444	1.63865
6.26277	1.7252
6.28111	1.70789
6.29945	1.69058
6.31778	1.84637
6.33612	1.84252
6.35446	1.85983
6.37279	1.95407
6.39113	1.91176
6.40947	2.11371
6.4278	2.25988
6.44614	2.27911
6.46448	2.43682
6.48282	2.53491
6.50115	2.65031
6.51949	2.58491
6.53783	2.89264
6.55616	3.00612
6.5745	3.0542
6.59284	3.32346
6.61117	3.75043
6.62951	3.90237
6.64785	4.14856
6.66618	4.49283
6.68452	4.64477
6.70286	4.81209
6.72119	5.1679
6.73953	5.47563
6.75787	5.87568
6.77621	6.09109
6.79454	6.59884
6.81288	7.22391
6.83122	7.5778
6.84955	8.16825
6.86789	8.90872
6.88623	9.76651
6.90456	10.8686
6.9229	11.7975
6.94124	12.7207
6.95957	13.9189
6.97791	15.4268
6.99625	16.7039
7.01459	18.2983
7.03292	19.8581
7.05126	22.0949
7.0696	24.147
7.08793	26.1684
7.10627	29.2438
7.12461	31.5171
7.14294	35.0175
7.16128	38.6314
7.17962	43.3915
7.19795	49.0884
7.21629	55.391
7.23463	63.3304
7.25296	72.5815
7.2713	83.4769
7.28964	96.6188
7.30798	110.574
7.32631	126.238
7.34465	138.52
7.36299	144.801
7.38132	139.126
7.39966	118.041
7.418	93.5781
7.43633	69.5619
7.45467	50.7424
7.47301	35.3272
7.49134	25.4029
7.50968	19.8734
7.52802	15.7518
7.54636	12.288
7.56469	8.73562
7.58303	6.51998
7.60137	4.61592
7.6197	3.63696
7.63804	2.95611
7.65638	2.79071
7.67471	2.46759
7.69305	2.39258
7.71139	2.05024
7.72972	1.94446
7.74806	1.76559
7.7664	1.74059
7.78473	1.64827
7.80307	1.5848
7.82141	1.5521
7.83975	1.45786
7.85808	1.33285
7.87642	1.23283
7.89476	1.29823
7.91309	1.19245
7.93143	1.20014
7.94977	1.11167
7.9681	1.17129
7.98644	1.02896
8.00478	1.13667
8.02311	0.984729
8.04145	1.03089
8.05979	1.00781
8.07813	0.90395
8.09646	0.90972
8.1148	0.877024
8.13314	0.928953
8.15147	0.830865
8.16981	0.832788
8.18815	0.802016
8.20648	0.878948
8.22482	0.782783
8.24316	0.794322
8.26149	0.796246
8.27983	0.759703
8.29817	0.784706
8.3165	0.72316
8.33484	0.748163
8.35318	0.736623
8.37152	0.74624
8.38985	0.690464
8.40819	0.72893
8.42653	0.719314
8.44486	0.709697
8.4632	0.623149
8.48154	0.738547
8.49987	0.642382
8.51821	0.671231
8.53655	0.632765
8.55488	0.661615
8.57322	0.632765
8.59156	0.671231
8.6099	0.607762
8.62823	0.55968
8.64657	0.55968
8.66491	0.596223
8.68324	0.601993
8.70158	0.661615
8.71992	0.588529
8.73825	0.615456
8.75659	0.592376
8.77493	0.590453
8.79326	0.578913
8.8116	0.55391
8.82994	0.596223
8.84828	0.57122
8.86661	0.598146
8.88495	0.626995
8.90329	0.605839
8.92162	0.590453
8.93996	0.575066
8.9583	0.578913
8.97663	0.486595
8.99497	0.528907
9.01331	0.598146
9.03164	0.561603
9.04998	0.550063
9.06832	0.511597
9.08665	0.503904
9.10499	0.528907
9.12333	0.615456
9.14167	0.551987
9.16	0.494288
9.17834	0.603916
9.19668	0.54814
9.21501	0.498134
9.23335	0.5366
9.25169	0.486595
9.27002	0.555833
9.28836	0.496211
9.3067	0.486595
9.32503	0.507751
9.34337	0.534677
9.36171	0.525061
9.38005	0.567373
9.39838	0.498134
9.41672	0.436589
9.43506	0.482748
9.45339	0.521214
9.47173	0.507751
9.49007	0.509674
9.5084	0.56545
9.52674	0.5366
9.54508	0.53083
9.56341	0.469285
9.58175	0.515444
9.60009	0.511597
9.61842	0.469285
9.63676	0.459668
9.6551	0.486595
9.67344	0.459668
9.69177	0.509674
9.71011	0.525061
9.72845	0.473132
9.74678	0.478901
9.76512	0.461592
9.78346	0.469285
9.80179	0.507751
9.82013	0.475055
9.83847	0.475055
9.8568	0.426972
9.87514	0.480825
9.89348	0.525061
9.91182	0.521214
9.93015	0.496211
9.94849	0.494288
9.96683	0.465438
9.98516	0.457745
10.0035	0.465438
10.0218	0.411586
10.0402	0.480825
10.0585	0.413509
10.0768	0.465438
10.0952	0.465438
10.1135	0.442359
10.1319	0.475055
10.1502	0.425049
10.1685	0.567373
10.1869	0.434666
10.2052	0.444282
10.2235	0.461592
10.2419	0.448129
10.2602	0.450052
10.2786	0.463515
10.2969	0.450052
10.3152	0.461592
10.3336	0.440435
10.3519	0.446205
10.3702	0.475055
10.3886	0.436589
10.4069	0.450052
10.4252	0.425049
10.4436	0.446205
10.4619	0.480825
10.4803	0.426972
10.4986	0.453899
10.5169	0.457745
10.5353	0.434666
10.5536	0.428896
10.5719	0.451975
10.5903	0.3962
10.6086	0.461592
10.627	0.442359
10.6453	0.428896
10.6636	0.457745
10.682	0.448129
10.7003	0.417356
10.7186	0.421202
10.737	0.421202
10.7553	0.425049
10.7736	0.398123
10.792	0.432742
10.8103	0.413509
10.8287	0.426972
10.847	0.413509
10.8653	0.36735
10.8837	0.411586
10.902	0.436589
10.9203	0.432742
10.9387	0.3962
10.957	0.494288
10.9754	0.463515
10.9937	0.351964
11.012	0.438512
11.0304	0.415433
11.0487	0.39043
11.067	0.448129
11.0854	0.453899
11.1037	0.392353
11.1221	0.407739
11.1404	0.451975
11.1587	0.409663
11.1771	0.423126
11.1954	0.380813
11.2137	0.430819
11.2321	0.413509
11.2504	0.448129
11.2687	0.403893
11.2871	0.413509
11.3054	0.363503
11.3238	0.35581
11.3421	0.3962
11.3604	0.380813
11.3788	0.400046
11.3971	0.400046
11.4154	0.38466
11.4338	0.35581
11.4521	0.407739
11.4705	0.36735
11.4888	0.380813
11.5071	0.428896
11.5255	0.398123
11.5438	0.386583
11.5621	0.328884
11.5805	0.369273
11.5988	0.409663
11.6171	0.386583
11.6355	0.369273
11.6538	0.376967
11.6722	0.419279
11.6905	0.3962
11.7088	0.376967
11.7272	0.409663
11.7455	0.37312
11.7638	0.375043
11.7822	0.371197
11.8005	0.359657
11.8189	0.388506
11.8372	0.37889
11.8555	0.38466
11.8739	0.3962
11.8922	0.421202
11.9105	0.382736
11.9289	0.419279
11.9472	0.407739
11.9655	0.37889
11.9839	0.35581
12.0022	0.369273
12.0206	0.409663
12.0389	0.400046
12.0572	0.375043
12.0756	0.426972
12.0939	0.436589
12.1122	0.405816
12.1306	0.39043
12.1489	0.37312
12.1673	0.369273
12.1856	0.417356
12.2039	0.39043
12.2223	0.438512
12.2406	0.423126
12.2589	0.426972
12.2773	0.438512
12.2956	0.444282
12.3139	0.467362
12.3323	0.455822
12.3506	0.444282
12.369	0.525061
12.3873	0.503904
12.4056	0.513521
12.424	0.459668
12.4423	0.515444
12.4606	0.55968
12.479	0.594299
12.4973	0.630842
12.5157	0.665461
12.534	0.719314
12.5523	0.76932
12.5707	0.74624
12.589	0.90395
12.6073	0.942416
12.6257	1.03281
12.644	1.21937
12.6624	1.43478
12.6807	1.60788
12.699	1.84637
12.7174	2.13102
12.7357	2.28103
12.754	2.37912
12.7724	2.41374
12.7907	2.20795
12.809	2.15025
12.8274	1.53672
12.8457	1.15206
12.8641	0.917414
12.8824	0.730854
12.9007	0.700081
12.9191	0.636612
12.9374	0.575066
12.9557	0.505828
12.9741	0.463515
12.9924	0.440435
13.0108	0.444282
13.0291	0.403893
13.0474	0.430819
13.0658	0.453899
13.0841	0.436589
13.1024	0.386583
13.1208	0.401969
13.1391	0.450052
13.1574	0.419279
13.1758	0.371197
13.1941	0.371197
13.2125	0.348117
13.2308	0.428896
13.2491	0.405816
13.2675	0.334654
13.2858	0.386583
13.3041	0.39043
13.3225	0.326961
13.3408	0.300035
13.3592	0.37312
13.3775	0.326961
13.3958	0.357734
13.4142	0.36735
13.4325	0.36735
13.4508	0.36735
13.4692	0.369273
13.4875	0.342347
13.5058	0.36735
13.5242	0.315421
13.5425	0.359657
13.5609	0.35581
13.5792	0.411586
13.5975	0.313498
13.6159	0.330807
13.6342	0.36158
13.6525	0.353887
13.6709	0.38466
13.6892	0.307728
13.7076	0.353887
13.7259	0.382736
13.7442	0.334654
13.7626	0.38466
13.7809	0.340424
13.7992	0.363503
13.8176	0.37889
13.8359	0.37889
13.8542	0.363503
13.8726	0.323114
13.8909	0.394276
13.9093	0.351964
13.9276	0.325038
13.9459	0.342347
13.9643	0.313498
13.9826	0.351964
14.0009	0.357734
14.0193	0.388506
14.0376	0.382736
14.056	0.317344
14.0743	0.36158
14.0926	0.35004
14.111	0.351964
14.1293	0.376967
14.1476	0.319268
14.166	0.357734
14.1843	0.340424
14.2026	0.340424
14.221	0.369273
14.2393	0.336577
14.2577	0.398123
14.276	0.34427
14.2943	0.363503
14.3127	0.386583
14.331	0.353887
14.3493	0.35581
14.3677	0.315421
14.386	0.401969
14.4044	0.369273
14.4227	0.401969
14.441	0.380813
14.4594	0.3962
14.4777	0.334654
14.496	0.330807
14.5144	0.36735
14.5327	0.398123
14.5511	0.409663
14.5694	0.38466
14.5877	0.36735
14.6061	0.459668
14.6244	0.409663
14.6427	0.37889
14.6611	0.471208
14.6794	0.486595
14.6977	0.413509
14.7161	0.421202
14.7344	0.473132
14.7528	0.450052
14.7711	0.409663
14.7894	0.496211
14.8078	0.359657
14.8261	0.400046
14.8444	0.35004
14.8628	0.371197
14.8811	0.353887
14.8995	0.409663
14.9178	0.313498
14.9361	0.313498
14.9545	0.37889
14.9728	0.348117
14.9911	0.375043
15.0095	0.342347
15.0278	0.346194
15.0461	0.380813
15.0645	0.34427
15.0828	0.330807
15.1012	0.357734
15.1195	0.34427
15.1378	0.342347
15.1562	0.313498
15.1745	0.388506
15.1928	0.35581
15.2112	0.342347
15.2295	0.313498
15.2479	0.321191
15.2662	0.340424
15.2845	0.35004
15.3029	0.332731
15.3212	0.336577
15.3395	0.36158
15.3579	0.309651
15.3762	0.348117
15.3945	0.305805
15.4129	0.36735
15.4312	0.369273
15.4496	0.325038
15.4679	0.332731
15.4862	0.357734
15.5046	0.369273
15.5229	0.363503
15.5412	0.351964
15.5596	0.369273
15.5779	0.371197
15.5963	0.348117
15.6146	0.346194
15.6329	0.411586
15.6513	0.340424
15.6696	0.342347
15.6879	0.432742
15.7063	0.417356
15.7246	0.36735
15.7429	0.419279
15.7613	0.440435
15.7796	0.515444
15.798	0.467362
15.8163	0.492365
15.8346	0.563527
15.853	0.575066
15.8713	0.594299
15.8896	0.505828
15.908	0.605839
15.9263	0.678924
15.9447	0.646228
15.963	0.684694
15.9813	0.638535
15.9997	0.705851
16.018	0.609686
16.0363	0.594299
16.0547	0.657768
16.073	0.546217
16.0914	0.551987
16.1097	0.475055
16.128	0.476978
16.1464	0.461592
16.1647	0.448129
16.183	0.432742
16.2014	0.428896
16.2197	0.376967
16.238	0.401969
16.2564	0.413509
16.2747	0.376967
16.2931	0.394276
16.3114	0.351964
16.3297	0.376967
16.3481	0.353887
16.3664	0.328884
16.3847	0.346194
16.4031	0.38466
16.4214	0.39043
16.4398	0.340424
16.4581	0.359657
16.4764	0.34427
16.4948	0.39043
16.5131	0.330807
16.5314	0.351964
16.5498	0.332731
16.5681	0.36735
16.5864	0.365427
16.6048	0.363503
16.6231	0.407739
16.6415	0.336577
16.6598	0.36735
16.6781	0.300035
16.6965	0.369273
16.7148	0.340424
16.7331	0.315421
16.7515	0.371197
16.7698	0.348117
16.7882	0.323114
16.8065	0.307728
16.8248	0.330807
16.8432	0.394276
16.8615	0.340424
16.8798	0.417356
16.8982	0.342347
16.9165	0.359657
16.9348	0.332731
16.9532	0.359657
16.9715	0.300035
16.9899	0.36158
17.0082	0.359657
17.0265	0.342347
17.0449	0.353887
17.0632	0.351964
17.0815	0.35581
17.0999	0.363503
17.1182	0.340424
17.1366	0.332731
17.1549	0.405816
17.1732	0.38466
17.1916	0.400046
17.2099	0.417356
17.2282	0.334654
17.2466	0.400046
17.2649	0.400046
17.2832	0.353887
17.3016	0.450052
17.3199	0.409663
17.3383	0.426972
17.3566	0.461592
17.3749	0.455822
17.3933	0.496211
17.4116	0.463515
17.4299	0.413509
17.4483	0.498134
17.4666	0.544294
17.485	0.569296
17.5033	0.517367
17.5216	0.609686
17.54	0.600069
17.5583	0.711621
17.5766	0.698157
17.595	0.694311
17.6133	0.74047
17.6316	0.732777
17.65	0.732777
17.6683	0.680848
17.6867	0.640459
17.705	0.669308
17.7233	0.605839
17.7417	0.5366
17.76	0.490441
17.7783	0.473132
17.7967	0.513521
17.815	0.478901
17.8334	0.459668
17.8517	0.426972
17.87	0.517367
17.8884	0.413509
17.9067	0.415433
17.925	0.375043
17.9434	0.388506
17.9617	0.425049
17.9801	0.430819
17.9984	0.467362
18.0167	0.440435
18.0351	0.444282
18.0534	0.465438
18.0717	0.473132
18.0901	0.428896
18.1084	0.434666
18.1267	0.409663
18.1451	0.509674
18.1634	0.465438
18.1818	0.450052
18.2001	0.35581
18.2184	0.436589
18.2368	0.401969
18.2551	0.471208
18.2734	0.442359
18.2918	0.403893
18.3101	0.438512
18.3285	0.380813
18.3468	0.415433
18.3651	0.386583
18.3835	0.38466
18.4018	0.359657
18.4201	0.451975
18.4385	0.461592
18.4568	0.415433
18.4751	0.421202
18.4935	0.434666
18.5118	0.421202
18.5302	0.382736
18.5485	0.394276
18.5668	0.467362
18.5852	0.425049
18.6035	0.382736
18.6218	0.467362
18.6402	0.394276
18.6585	0.430819
18.6769	0.457745
18.6952	0.478901
18.7135	0.453899
18.7319	0.471208
18.7502	0.507751
18.7685	0.37889
18.7869	0.446205
18.8052	0.482748
18.8235	0.500058
18.8419	0.475055
18.8602	0.488518
18.8786	0.442359
18.8969	0.469285
18.9152	0.473132
18.9336	0.448129
18.9519	0.463515
18.9702	0.490441
18.9886	0.505828
19.0069	0.505828
19.0253	0.550063
19.0436	0.567373
19.0619	0.523137
19.0803	0.551987
19.0986	0.573143
19.1169	0.590453
19.1353	0.578913
19.1536	0.648152
19.1719	0.711621
19.1903	0.75201
19.2086	0.794322
19.227	0.888564
19.2453	0.817402
19.2636	0.888564
19.282	0.9328
19.3003	1.0732
19.3186	1.1309
19.337	1.28861
19.3553	1.44247
19.3737	1.69443
19.392	1.93676
19.4103	2.39066
19.4287	2.70608
19.447	3.41578
19.4653	3.94661
19.4837	4.89864
19.502	6.02954
19.5204	6.9585
19.5387	7.74705
19.557	8.42982
19.5754	8.3048
19.5937	8.0817
19.612	6.88541
19.6304	5.78336
19.6487	4.56399
19.667	3.45424
19.6854	2.68685
19.7037	2.00215
19.7221	1.61172
19.7404	1.42324
19.7587	1.17898
19.7771	1.02127
19.7954	1.00589
19.8137	0.873178
19.8321	0.850098
19.8504	0.817402
19.8688	0.748163
19.8871	0.625072
19.9054	0.661615
19.9238	0.58276
19.9421	0.580836
19.9604	0.605839
19.9788	0.526984
19.9971	0.53083
20.0154	0.58276
20.0338	0.54814
20.0521	0.603916
20.0705	0.490441
20.0888	0.523137
20.1071	0.484671
20.1255	0.519291
20.1438	0.494288
20.1621	0.403893
20.1805	0.496211
20.1988	0.501981
20.2172	0.478901
20.2355	0.523137
20.2538	0.490441
20.2722	0.448129
20.2905	0.501981
20.3088	0.450052
20.3272	0.465438
20.3455	0.434666
20.3638	0.430819
20.3822	0.419279
20.4005	0.448129
20.4189	0.455822
20.4372	0.484671
20.4555	0.511597
20.4739	0.501981
20.4922	0.482748
20.5105	0.475055
20.5289	0.551987
20.5472	0.432742
20.5656	0.534677
20.5839	0.496211
20.6022	0.567373
20.6206	0.476978
20.6389	0.544294
20.6572	0.513521
20.6756	0.532754
20.6939	0.471208
20.7122	0.501981
20.7306	0.480825
20.7489	0.534677
20.7673	0.507751
20.7856	0.494288
20.8039	0.526984
20.8223	0.54237
20.8406	0.505828
20.8589	0.521214
20.8773	0.580836
20.8956	0.575066
20.914	0.521214
20.9323	0.611609
20.9506	0.58276
20.969	0.596223
20.9873	0.592376
21.0056	0.630842
21.024	0.580836
21.0423	0.615456
21.0607	0.557757
21.079	0.573143
21.0973	0.540447
21.1157	0.598146
21.134	0.544294
21.1523	0.500058
21.1707	0.532754
21.189	0.538524
21.2073	0.519291
21.2257	0.590453
21.244	0.546217
21.2624	0.557757
21.2807	0.528907
21.299	0.509674
21.3174	0.601993
21.3357	0.54814
21.354	0.53083
21.3724	0.607762
21.3907	0.569296
21.4091	0.600069
21.4274	0.651998
21.4457	0.603916
21.4641	0.715467
21.4824	0.632765
21.5007	0.727007
21.5191	0.782783
21.5374	0.844328
21.5557	0.871254
21.5741	1.03089
21.5924	0.994345
21.6108	1.10782
21.6291	1.27322
21.6474	1.41939
21.6658	1.52902
21.6841	1.7002
21.7024	1.8656
21.7208	2.15217
21.7391	2.29065
21.7575	2.60222
21.7758	2.80417
21.7941	3.07343
21.8125	3.19652
21.8308	2.95034
21.8491	3.09459
21.8675	2.84841
21.8858	2.58299
21.9041	2.25411
21.9225	2.16179
21.9408	1.93676
21.9592	1.65981
21.9775	1.51556
21.9958	1.36939
22.0142	1.31938
22.0325	1.18091
22.0508	1.11936
22.0692	1.0732
22.0875	1.1059
22.1059	1.15013
22.1242	1.13475
22.1425	1.14821
22.1609	1.32708
22.1792	1.38285
22.1975	1.4944
22.2159	1.50017
22.2342	1.70212
22.2525	1.56364
22.2709	1.44824
22.2892	1.21552
22.3076	1.19052
22.3259	1.0482
22.3442	1.00781
22.3626	0.969343
22.3809	0.884717
22.3992	0.848175
22.4176	0.775089
22.4359	0.753933
22.4543	0.648152
22.4726	0.651998
22.4909	0.634689
22.5093	0.498134
22.5276	0.578913
22.5459	0.528907
22.5643	0.540447
22.5826	0.453899
22.6009	0.492365
22.6193	0.471208
22.6376	0.450052
22.656	0.482748
22.6743	0.498134
22.6926	0.492365
22.711	0.476978
22.7293	0.492365
22.7476	0.446205
22.766	0.476978
22.7843	0.498134
22.8027	0.469285
22.821	0.484671
22.8393	0.467362
22.8577	0.421202
22.876	0.413509
22.8943	0.469285
22.9127	0.419279
22.931	0.392353
22.9494	0.419279
22.9677	0.425049
22.986	0.388506
23.0044	0.509674
23.0227	0.403893
23.041	0.450052
23.0594	0.403893
23.0777	0.426972
23.096	0.444282
23.1144	0.425049
23.1327	0.405816
23.1511	0.39043
23.1694	0.461592
23.1877	0.457745
23.2061	0.375043
23.2244	0.451975
23.2427	0.457745
23.2611	0.405816
23.2794	0.453899
23.2978	0.450052
23.3161	0.432742
23.3344	0.501981
23.3528	0.486595
23.3711	0.432742
23.3894	0.465438
23.4078	0.488518
23.4261	0.486595
23.4444	0.503904
23.4628	0.473132
23.4811	0.501981
23.4995	0.492365
23.5178	0.436589
23.5361	0.436589
23.5545	0.480825
23.5728	0.467362
23.5911	0.484671
23.6095	0.438512
23.6278	0.407739
23.6462	0.398123
23.6645	0.421202
23.6828	0.413509
23.7012	0.409663
23.7195	0.482748
23.7378	0.426972
23.7562	0.434666
23.7745	0.457745
23.7928	0.388506
23.8112	0.432742
23.8295	0.39043
23.8479	0.411586
23.8662	0.423126
23.8845	0.471208
23.9029	0.471208
23.9212	0.473132
23.9395	0.450052
23.9579	0.496211
23.9762	0.55391
23.9946	0.53083
24.0129	0.609686
24.0312	0.53083
24.0496	0.640459
24.0679	0.648152
24.0862	0.702004
24.1046	0.767396
24.1229	0.790476
24.1412	0.959726
24.1596	0.877024
24.1779	1.0155
24.1963	1.14436
24.2146	1.19822
24.2329	1.2463
24.2513	1.25784
24.2696	1.21745
24.2879	1.21937
24.3063	0.998192
24.3246	1.08282
24.343	0.925107
24.3613	0.832788
24.3796	0.873178
24.398	0.759703
24.4163	0.696234
24.4346	0.678924
24.453	0.626995
24.4713	0.636612
24.4897	0.634689
24.508	0.617379
24.5263	0.580836
24.5447	0.655845
24.563	0.601993
24.5813	0.513521
24.5997	0.5366
24.618	0.563527
24.6363	0.590453
24.6547	0.600069
24.673	0.590453
24.6914	0.54814
24.7097	0.592376
24.728	0.5366
24.7464	0.53083
24.7647	0.500058
24.783	0.500058
24.8014	0.473132
24.8197	0.482748
24.8381	0.432742
24.8564	0.478901
24.8747	0.409663
24.8931	0.405816
24.9114	0.432742
24.9297	0.39043
24.9481	0.417356
24.9664	0.375043
24.9847	0.309651
25.0031	0.392353
25.0214	0.36735
25.0398	0.369273
25.0581	0.375043
25.0764	0.388506
25.0948	0.35581
25.1131	0.298111
25.1314	0.301958
25.1498	0.351964
25.1681	0.340424
25.1865	0.380813
25.2048	0.336577
25.2231	0.342347
25.2415	0.338501
25.2598	0.380813
25.2781	0.342347
25.2965	0.357734
25.3148	0.37312
25.3331	0.38466
25.3515	0.330807
25.3698	0.348117
25.3882	0.35581
25.4065	0.340424
25.4248	0.34427
25.4432	0.319268
25.4615	0.359657
25.4798	0.39043
25.4982	0.369273
25.5165	0.353887
25.5349	0.38466
25.5532	0.386583
25.5715	0.365427
25.5899	0.336577
25.6082	0.407739
25.6265	0.446205
25.6449	0.444282
25.6632	0.398123
25.6815	0.450052
25.6999	0.507751
25.7182	0.521214
25.7366	0.475055
25.7549	0.494288
25.7732	0.528907
25.7916	0.498134
25.8099	0.423126
25.8282	0.490441
25.8466	0.475055
25.8649	0.463515
25.8833	0.386583
25.9016	0.353887
25.9199	0.394276
25.9383	0.411586
25.9566	0.353887
25.9749	0.351964
25.9933	0.351964
26.0116	0.326961
26.0299	0.37889
26.0483	0.37889
26.0666	0.369273
26.085	0.326961
26.1033	0.348117
26.1216	0.37312
26.14	0.303881
26.1583	0.351964
26.1766	0.315421
26.195	0.338501
26.2133	0.325038
26.2317	0.35581
26.25	0.315421
26.2683	0.346194
26.2867	0.328884
26.305	0.334654
26.3233	0.334654
26.3417	0.323114
26.36	0.300035
26.3784	0.321191
26.3967	0.282725
26.415	0.309651
26.4334	0.298111
26.4517	0.301958
26.47	0.305805
26.4884	0.296188
26.5067	0.315421
26.525	0.301958
26.5434	0.36158
26.5617	0.371197
26.5801	0.311574
26.5984	0.36158
26.6167	0.409663
26.6351	0.369273
26.6534	0.365427
26.6717	0.436589
26.6901	0.436589
26.7084	0.440435
26.7268	0.5366
26.7451	0.496211
26.7634	0.534677
26.7818	0.56545
26.8001	0.586606
26.8184	0.528907
26.8368	0.551987
26.8551	0.528907
26.8734	0.503904
26.8918	0.475055
26.9101	0.444282
26.9285	0.386583
26.9468	0.409663
26.9651	0.415433
26.9835	0.328884
27.0018	0.37312
27.0201	0.382736
27.0385	0.398123
27.0568	0.37312
27.0752	0.400046
27.0935	0.388506
27.1118	0.371197
27.1302	0.34427
27.1485	0.430819
27.1668	0.421202
27.1852	0.39043
27.2035	0.405816
27.2218	0.403893
27.2402	0.428896
27.2585	0.490441
27.2769	0.475055
27.2952	0.444282
27.3135	0.55391
27.3319	0.588529
27.3502	0.650075
27.3685	0.703927
27.3869	0.75201
27.4052	0.815479
27.4236	0.907797
27.4419	0.988576
27.4602	0.990499
27.4786	1.03089
27.4969	1.02512
27.5152	1.03089
27.5336	1.01743
27.5519	1.06166
27.5702	0.861638
27.5886	0.871254
27.6069	0.778936
27.6253	0.694311
27.6436	0.613532
27.6619	0.592376
27.6803	0.598146
27.6986	0.561603
27.7169	0.455822
27.7353	0.5366
27.7536	0.459668
27.772	0.498134
27.7903	0.425049
27.8086	0.388506
27.827	0.490441
27.8453	0.423126
27.8636	0.37889
27.882	0.403893
27.9003	0.386583
27.9187	0.398123
27.937	0.357734
27.9553	0.334654
27.9737	0.369273
27.992	0.388506
28.0103	0.37312
28.0287	0.411586
28.047	0.357734
28.0653	0.340424
28.0837	0.348117
28.102	0.340424
28.1204	0.37889
28.1387	0.426972
28.157	0.426972
28.1754	0.398123
28.1937	0.400046
28.212	0.451975
28.2304	0.405816
28.2487	0.436589
28.2671	0.453899
28.2854	0.55391
28.3037	0.482748
28.3221	0.519291
28.3404	0.540447
28.3587	0.57122
28.3771	0.680848
28.3954	0.815479
28.4137	0.844328
28.4321	0.900104
28.4504	0.94434
28.4688	1.03089
28.4871	1.00204
28.5054	1.05974
28.5238	1.10397
28.5421	1.01935
28.5604	1.00204
28.5788	0.940493
28.5971	0.805862
28.6155	0.72316
28.6338	0.677001
28.6521	0.603916
28.6705	0.621226
28.6888	0.525061
28.7071	0.526984
28.7255	0.517367
28.7438	0.461592
28.7621	0.440435
28.7805	0.409663
28.7988	0.444282
28.8172	0.380813
28.8355	0.338501
28.8538	0.346194
28.8722	0.346194
28.8905	0.319268
28.9088	0.315421
28.9272	0.328884
28.9455	0.265415
28.9639	0.319268
28.9822	0.298111
29.0005	0.319268
29.0189	0.280802
29.0372	0.336577
29.0555	0.265415
29.0739	0.288495
29.0922	0.278878
29.1105	0.292341
29.1289	0.282725
29.1472	0.248106
29.1656	0.286572
29.1839	0.284648
29.2022	0.305805
29.2206	0.255799
29.2389	0.230796
29.2572	0.294265
29.2756	0.257722
29.2939	0.263492
29.3123	0.255799
29.3306	0.273108
29.3489	0.315421
29.3673	0.255799
29.3856	0.271185
29.4039	0.278878
29.4223	0.271185
29.4406	0.298111
29.459	0.328884
29.4773	0.307728
29.4956	0.292341
29.514	0.251952
29.5323	0.300035
29.5506	0.284648
29.569	0.353887
29.5873	0.326961
29.6056	0.323114
29.624	0.323114
29.6423	0.278878
29.6607	0.309651
29.679	0.282725
29.6973	0.290418
29.7157	0.294265
29.734	0.311574
29.7523	0.267339
29.7707	0.261569
29.789	0.342347
29.8074	0.313498
29.8257	0.290418
29.844	0.315421
29.8624	0.261569
29.8807	0.261569
29.899	0.319268
29.9174	0.290418
29.9357	0.236566
29.954	0.253875
29.9724	0.265415
29.9907	0.257722
30.0091	0.234642
30.0274	0.263492
30.0457	0.215409
30.0641	0.248106
30.0824	0.280802
30.1007	0.234642
30.1191	0.246182
30.1374	0.244259
30.1558	0.219256
30.1741	0.196176
30.1924	0.238489
30.2108	0.232719
30.2291	0.213486
30.2474	0.225026
30.2658	0.242336
30.2841	0.205793
30.3024	0.205793
30.3208	0.213486
30.3391	0.20964
30.3575	0.261569
30.3758	0.276955
30.3941	0.211563
30.4125	0.200023
30.4308	0.251952
30.4491	0.228873
30.4675	0.261569
30.4858	0.269262
30.5042	0.207716
30.5225	0.225026
30.5408	0.240412
30.5592	0.253875
30.5775	0.221179
30.5958	0.215409
30.6142	0.242336
30.6325	0.223103
30.6508	0.261569
30.6692	0.234642
30.6875	0.271185
30.7059	0.248106
30.7242	0.271185
30.7425	0.263492
30.7609	0.280802
30.7792	0.263492
30.7975	0.259645
30.8159	0.257722
30.8342	0.253875
30.8526	0.255799
30.8709	0.226949
30.8892	0.300035
30.9076	0.223103
30.9259	0.230796
30.9442	0.205793
30.9626	0.255799
30.9809	0.223103
30.9992	0.221179
31.0176	0.269262
31.0359	0.263492
31.0543	0.226949
31.0726	0.267339
31.0909	0.250029
31.1093	0.311574
31.1276	0.215409
31.1459	0.251952
31.1643	0.286572
31.1826	0.259645
31.201	0.309651
31.2193	0.309651
31.2376	0.296188
31.256	0.346194
31.2743	0.37889
31.2926	0.35581
31.311	0.409663
31.3293	0.36158
31.3477	0.421202
31.366	0.423126
31.3843	0.432742
31.4027	0.386583
31.421	0.386583
31.4393	0.380813
31.4577	0.342347
31.476	0.375043
31.4943	0.317344
31.5127	0.35004
31.531	0.338501
31.5494	0.35004
31.5677	0.334654
31.586	0.338501
31.6044	0.294265
31.6227	0.307728
31.641	0.342347
31.6594	0.325038
31.6777	0.313498
31.6961	0.284648
31.7144	0.292341
31.7327	0.334654
31.7511	0.253875
31.7694	0.267339
31.7877	0.267339
31.8061	0.240412
31.8244	0.225026
31.8427	0.205793
31.8611	0.250029
31.8794	0.242336
31.8978	0.225026
31.9161	0.223103
31.9344	0.267339
31.9528	0.20387
31.9711	0.20964
31.9894	0.18656
32.0078	0.219256
32.0261	0.253875
32.0445	0.20387
32.0628	0.207716
32.0811	0.200023
32.0995	0.194253
32.1178	0.240412
32.1361	0.217333
32.1545	0.238489
32.1728	0.228873
32.1911	0.236566
32.2095	0.228873
32.2278	0.236566
32.2462	0.223103
32.2645	0.230796
32.2828	0.213486
32.3012	0.236566
32.3195	0.205793
32.3378	0.225026
32.3562	0.200023
32.3745	0.219256
32.3929	0.259645
32.4112	0.232719
32.4295	0.280802
32.4479	0.244259
32.4662	0.255799
32.4845	0.278878
32.5029	0.296188
32.5212	0.259645
32.5395	0.309651
32.5579	0.248106
32.5762	0.284648
32.5946	0.261569
32.6129	0.251952
32.6312	0.276955
32.6496	0.255799
32.6679	0.292341
32.6862	0.284648
32.7046	0.271185
32.7229	0.228873
32.7413	0.236566
32.7596	0.248106
32.7779	0.267339
32.7963	0.223103
32.8146	0.230796
32.8329	0.257722
32.8513	0.215409
32.8696	0.238489
32.888	0.255799
32.9063	0.201946
32.9246	0.211563
32.943	0.200023
32.9613	0.263492
32.9796	0.219256
32.998	0.201946
33.0163	0.225026
33.0346	0.219256
33.053	0.217333
33.0713	0.211563
33.0897	0.234642
33.108	0.1981
33.1263	0.184637
33.1447	0.259645
33.163	0.257722
33.1813	0.188483
33.1997	0.213486
33.218	0.20387
33.2364	0.225026
33.2547	0.217333
33.273	0.20387
33.2914	0.20387
33.3097	0.219256
33.328	0.1981
33.3464	0.240412
33.3647	0.255799
33.383	0.238489
33.4014	0.238489
33.4197	0.20387
33.4381	0.217333
33.4564	0.221179
33.4747	0.221179
33.4931	0.257722
33.5114	0.221179
33.5297	0.246182
33.5481	0.225026
33.5664	0.240412
33.5848	0.225026
33.6031	0.223103
33.6214	0.255799
33.6398	0.250029
33.6581	0.267339
33.6764	0.286572
33.6948	0.255799
33.7131	0.271185
33.7314	0.288495
33.7498	0.301958
33.7681	0.303881
33.7865	0.35581
33.8048	0.328884
33.8231	0.398123
33.8415	0.407739
33.8598	0.465438
33.8781	0.457745
33.8965	0.550063
33.9148	0.557757
33.9332	0.594299
33.9515	0.586606
33.9698	0.667385
33.9882	0.611609
34.0065	0.625072
34.0248	0.551987
34.0432	0.569296
34.0615	0.540447
34.0798	0.457745
34.0982	0.446205
34.1165	0.392353
34.1349	0.403893
34.1532	0.330807
34.1715	0.351964
34.1899	0.305805
34.2082	0.323114
34.2265	0.273108
34.2449	0.301958
34.2632	0.305805
34.2816	0.244259
34.2999	0.255799
34.3182	0.253875
34.3366	0.269262
34.3549	0.253875
34.3732	0.236566
34.3916	0.221179
34.4099	0.215409
34.4282	0.207716
34.4466	0.207716
34.4649	0.182713
34.4833	0.225026
34.5016	0.217333
34.5199	0.20964
34.5383	0.182713
34.5566	0.20387
34.5749	0.217333
34.5933	0.182713
34.6116	0.213486
34.63	0.1981
34.6483	0.184637
34.6666	0.226949
34.685	0.20387
34.7033	0.178867
34.7216	0.188483
34.74	0.219256
34.7583	0.176943
34.7767	0.20964
34.795	0.238489
34.8133	0.1981
34.8317	0.207716
34.85	0.238489
34.8683	0.217333
34.8867	0.200023
34.905	0.207716
34.9233	0.20964
34.9417	0.225026
34.96	0.226949
34.9784	0.200023
34.9967	0.205793
35.015	0.232719
35.0334	0.232719
35.0517	0.213486
35.07	0.244259
35.0884	0.18079
35.1067	0.211563
35.1251	0.226949
35.1434	0.18656
35.1617	0.230796
35.1801	0.213486
35.1984	0.211563
35.2167	0.18656
35.2351	0.215409
35.2534	0.240412
35.2717	0.242336
35.2901	0.211563
35.3084	0.228873
35.3268	0.190407
35.3451	0.267339
35.3634	0.205793
35.3818	0.263492
35.4001	0.265415
35.4184	0.290418
35.4368	0.278878
35.4551	0.280802
35.4735	0.259645
35.4918	0.278878
35.5101	0.348117
35.5285	0.346194
35.5468	0.36158
35.5651	0.415433
35.5835	0.400046
35.6018	0.357734
35.6201	0.388506
35.6385	0.467362
35.6568	0.453899
35.6752	0.417356
35.6935	0.401969
35.7118	0.371197
35.7302	0.365427
35.7485	0.326961
35.7668	0.292341
35.7852	0.35004
35.8035	0.275032
35.8219	0.263492
35.8402	0.305805
35.8585	0.271185
35.8769	0.244259
35.8952	0.273108
35.9135	0.263492
35.9319	0.219256
35.9502	0.242336
35.9685	0.261569
35.9869	0.261569
36.0052	0.269262
36.0236	0.230796
36.0419	0.20964
36.0602	0.1981
36.0786	0.223103
36.0969	0.20964
36.1152	0.242336
36.1336	0.253875
36.1519	0.194253
36.1703	0.226949
36.1886	0.240412
36.2069	0.211563
36.2253	0.205793
36.2436	0.230796
36.2619	0.234642
36.2803	0.18079
36.2986	0.165404
36.317	0.20387
36.3353	0.178867
36.3536	0.20964
36.372	0.242336
36.3903	0.230796
36.4086	0.190407
36.427	0.178867
36.4453	0.182713
36.4636	0.19233
36.482	0.19233
36.5003	0.205793
36.5187	0.182713
36.537	0.205793
36.5553	0.221179
36.5737	0.1981
36.592	0.201946
36.6103	0.248106
36.6287	0.242336
36.647	0.184637
36.6654	0.250029
36.6837	0.213486
36.702	0.246182
36.7204	0.207716
36.7387	0.1981
36.757	0.201946
36.7754	0.255799
36.7937	0.246182
36.812	0.215409
36.8304	0.18079
36.8487	0.253875
36.8671	0.196176
36.8854	0.201946
36.9037	0.20964
36.9221	0.184637
36.9404	0.217333
36.9587	0.201946
36.9771	0.211563
36.9954	0.217333
37.0138	0.20964
37.0321	0.200023
37.0504	0.16348
37.0688	0.196176
37.0871	0.173097
37.1054	0.234642
37.1238	0.190407
37.1421	0.207716
37.1604	0.144247
37.1788	0.17502
37.1971	0.17502
37.2155	0.157711
37.2338	0.205793
37.2521	0.184637
37.2705	0.190407
37.2888	0.217333
37.3071	0.146171
37.3255	0.188483
37.3438	0.228873
37.3622	0.178867
37.3805	0.18656
37.3988	0.219256
37.4172	0.194253
37.4355	0.17502
37.4538	0.19233
37.4722	0.182713
37.4905	0.182713
37.5088	0.16348
37.5272	0.184637
37.5455	0.18656
37.5639	0.178867
37.5822	0.16348
37.6005	0.238489
37.6189	0.167327
37.6372	0.188483
37.6555	0.18079
37.6739	0.184637
37.6922	0.20387
37.7106	0.157711
37.7289	0.196176
37.7472	0.165404
37.7656	0.213486
37.7839	0.19233
37.8022	0.178867
37.8206	0.196176
37.8389	0.161557
37.8573	0.17502
37.8756	0.178867
37.8939	0.211563
37.9123	0.18656
37.9306	0.176943
37.9489	0.16925
37.9673	0.161557
37.9856	0.16348
38.0039	0.205793
38.0223	0.194253
38.0406	0.219256
38.059	0.17502
38.0773	0.1981
38.0956	0.173097
38.114	0.161557
38.1323	0.151941
38.1506	0.18656
38.169	0.182713
38.1873	0.16348
38.2057	0.190407
38.224	0.223103
38.2423	0.142324
38.2607	0.173097
38.279	0.211563
38.2973	0.19233
38.3157	0.176943
38.334	0.200023
38.3523	0.1981
38.3707	0.165404
38.389	0.200023
38.4074	0.159634
38.4257	0.16925
38.444	0.207716
38.4624	0.144247
38.4807	0.140401
38.499	0.165404
38.5174	0.188483
38.5357	0.18656
38.5541	0.200023
38.5724	0.194253
38.5907	0.200023
38.6091	0.196176
38.6274	0.184637
38.6457	0.190407
38.6641	0.184637
38.6824	0.217333
38.7007	0.205793
38.7191	0.184637
38.7374	0.20387
38.7558	0.196176
38.7741	0.1981
38.7924	0.1981
38.8108	0.211563
38.8291	0.213486
38.8474	0.17502
38.8658	0.223103
38.8841	0.223103
38.9025	0.217333
38.9208	0.250029
38.9391	0.182713
38.9575	0.250029
38.9758	0.238489
38.9941	0.228873
39.0125	0.219256
39.0308	0.284648
39.0491	0.207716
39.0675	0.269262
39.0858	0.226949
39.1042	0.213486
39.1225	0.267339
39.1408	0.263492
39.1592	0.267339
39.1775	0.251952
39.1958	0.217333
39.2142	0.221179
39.2325	0.201946
39.2509	0.213486
39.2692	0.178867
39.2875	0.161557
39.3059	0.207716
39.3242	0.194253
39.3425	0.20387
39.3609	0.226949
39.3792	0.213486
39.3975	0.232719
39.4159	0.255799
39.4342	0.207716
39.4526	0.228873
39.4709	0.226949
39.4892	0.217333
39.5076	0.221179
39.5259	0.20964
39.5442	0.200023
39.5626	0.223103
39.5809	0.232719
39.5993	0.219256
39.6176	0.215409
39.6359	0.257722
39.6543	0.311574
39.6726	0.280802
39.6909	0.326961
39.7093	0.34427
39.7276	0.309651
39.746	0.334654
39.7643	0.303881
39.7826	0.307728
39.801	0.323114
39.8193	0.292341
39.8376	0.263492
39.856	0.259645
39.8743	0.250029
39.8926	0.267339
39.911	0.248106
39.9293	0.1981
39.9477	0.250029
39.966	0.20964
39.9843	0.1981
40.0027	0.221179
40.021	0.188483
40.0393	0.20387
40.0577	0.17502
40.076	0.213486
40.0944	0.196176
40.1127	0.242336
40.131	0.173097
40.1494	0.228873
40.1677	0.217333
40.186	0.253875
40.2044	0.217333
40.2227	0.225026
40.241	0.259645
40.2594	0.213486
40.2777	0.234642
40.2961	0.232719
40.3144	0.207716
40.3327	0.228873
40.3511	0.269262
40.3694	0.267339
40.3877	0.20387
40.4061	0.16925
40.4244	0.211563
40.4428	0.240412
40.4611	0.219256
40.4794	0.215409
40.4978	0.205793
40.5161	0.253875
40.5344	0.20964
[truncated: 1,056 more rows]

[truncated: 9 more sheets: Cooling 105 °C, Cooling 95 °C, Cooling 85 °C, Cooling 75 °C, Cooling 65 °C, Cooling 55 °C, Cooling 45 °C, Cooling 35 °C, Cooling 25 °C]
