# Supplementary material for: Thermally induced structural transformations of linear coordination polymers based on aluminum tris(diorganophosphates)
Source: Royal Society of Chemistry journal article supplement (doi:10.1039/c8dt02672f), 2018-01-01
Supplement: c8dt02672f3.xlsx [file c8dt02672f3.xlsx]

## Sheet: Heating 25 °C
2theta	Intensity
3.89731	1.48286
3.91565	1.45209
3.93399	1.49633
3.95232	1.51748
3.97066	1.50017
3.989	1.56941
4.00733	1.38478
4.02567	1.46363
4.04401	1.35977
4.06234	1.37708
4.08068	1.48094
4.09902	1.38862
4.11735	1.31361
4.13569	1.39631
4.15403	1.32131
4.17237	1.35593
4.1907	1.37708
4.20904	1.42901
4.22738	1.42516
4.24571	1.36747
4.26405	1.3867
4.28239	1.30784
4.30072	1.40208
4.31906	1.34823
4.3374	1.24245
4.35573	1.3867
4.37407	1.37131
4.39241	1.40593
4.41075	1.32708
4.42908	1.30977
4.44742	1.27899
4.46576	1.26745
4.48409	1.32323
4.50243	1.34054
4.52077	1.26745
4.5391	1.24822
4.55744	1.19629
4.57578	1.22899
4.59411	1.28092
4.61245	1.19629
4.63079	1.20591
4.64913	1.21168
4.66746	1.16937
4.6858	1.20783
4.70414	1.22129
4.72247	1.14629
4.74081	1.20591
4.75915	1.0982
4.77748	1.30207
4.79582	1.26553
4.81416	1.20591
4.83249	1.20783
4.85083	1.15398
4.86917	1.11551
4.8875	1.20014
4.90584	1.18283
4.92418	1.25399
4.94252	1.11359
4.96085	1.10205
4.97919	1.17129
4.99753	1.22514
5.01586	1.07705
5.0342	1.13667
5.05254	1.16167
5.07087	1.10782
5.08921	1.17706
5.10755	1.20014
5.12588	1.15975
5.14422	1.13859
5.16256	1.14244
5.1809	1.07897
5.19923	1.17129
5.21757	1.07512
5.23591	1.13282
5.25424	1.09436
5.27258	1.07512
5.29092	1.10205
5.30925	1.17129
5.32759	1.06358
5.34593	1.08474
5.36426	1.13282
5.3826	1.10974
5.40094	0.973189
5.41927	1.06358
5.43761	1.12128
5.45595	1.02127
5.47429	1.11167
5.49262	1.19245
5.51096	1.05589
5.5293	1.1059
5.54763	1.06935
5.56597	1.0405
5.58431	1.16744
5.60264	1.07897
5.62098	1.13667
5.63932	1.09243
5.65765	1.04627
5.67599	1.1309
5.69433	1.11936
5.71267	1.14821
5.731	1.02319
5.74934	1.12705
5.76768	1.09051
5.78601	1.17706
5.80435	1.12705
5.82269	1.08666
5.84102	1.11359
5.85936	1.01743
5.8777	1.17514
5.89603	1.0155
5.91437	0.994345
5.93271	1.15975
5.95104	1.11167
5.96938	1.15206
5.98772	1.16167
6.00606	1.14244
6.02439	1.10397
6.04273	1.26553
6.06107	1.16744
6.0794	1.1559
6.09774	1.1886
6.11608	1.15398
6.13441	1.22322
6.15275	1.33477
6.17109	1.27515
6.18942	1.33092
6.20776	1.27899
6.2261	1.4367
6.24444	1.31746
6.26277	1.30592
6.28111	1.49248
6.29945	1.48671
6.31778	1.51556
6.33612	1.56557
6.35446	1.46748
6.37279	1.65019
6.39113	1.80982
6.40947	1.8079
6.4278	1.78482
6.44614	1.90791
6.46448	1.89637
6.48282	2.0637
6.50115	2.01562
6.51949	2.07332
6.53783	2.16563
6.55616	2.26372
6.5745	2.48298
6.59284	2.54068
6.61117	2.64646
6.62951	2.80032
6.64785	2.92534
6.66618	3.1619
6.68452	3.4504
6.70286	3.56003
6.72119	3.76005
6.73953	4.08316
6.75787	4.33319
6.77621	4.55629
6.79454	4.88518
6.81288	5.28715
6.83122	5.51794
6.84955	5.87952
6.86789	6.29496
6.88623	6.75078
6.90456	7.28738
6.9229	7.92399
6.94124	8.62984
6.95957	9.5588
6.97791	10.2916
6.99625	11.0705
7.01459	11.8244
7.03292	13.3958
7.05126	14.6575
7.0696	16.1057
7.08793	17.2808
7.10627	19.1041
7.12461	21.1217
7.14294	23.0834
7.16128	25.5049
7.17962	27.4512
7.19795	30.1516
7.21629	33.225
7.23463	36.7523
7.25296	41.399
7.2713	46.1899
7.28964	51.8002
7.30798	59.1068
7.32631	67.9828
7.34465	78.4687
7.36299	90.9605
7.38132	104.141
7.39966	120.474
7.418	133.358
7.43633	143.58
7.45467	142.515
7.47301	123.38
7.49134	96.2265
7.50968	70.3812
7.52802	52.106
7.54636	37.5447
7.56469	26.5434
7.58303	19.8696
7.60137	15.7287
7.6197	12.6053
7.63804	9.70497
7.65638	7.05658
7.67471	5.09482
7.69305	4.12548
7.71139	3.28307
7.72972	3.00035
7.74806	2.67916
7.7664	2.29642
7.78473	2.14832
7.80307	1.93292
7.82141	1.85406
7.83975	1.67904
7.85808	1.64442
7.87642	1.43478
7.89476	1.47325
7.91309	1.35593
7.93143	1.33862
7.94977	1.36747
7.9681	1.31746
7.98644	1.20399
8.00478	1.24822
8.02311	1.09628
8.04145	1.05781
8.05979	1.00012
8.07813	1.00012
8.09646	1.01935
8.1148	0.957803
8.13314	1.01935
8.15147	0.919337
8.16981	0.886641
8.18815	0.859715
8.20648	0.875101
8.22482	0.832788
8.24316	0.90972
8.26149	0.765473
8.27983	0.809709
8.29817	0.890487
8.3165	0.813555
8.33484	0.825095
8.35318	0.719314
8.37152	0.673155
8.38985	0.784706
8.40819	0.74047
8.42653	0.719314
8.44486	0.713544
8.4632	0.75201
8.48154	0.744317
8.49987	0.680848
8.51821	0.705851
8.53655	0.653922
8.55488	0.659691
8.57322	0.625072
8.59156	0.650075
8.6099	0.640459
8.62823	0.721237
8.64657	0.634689
8.66491	0.686618
8.68324	0.682771
8.70158	0.715467
8.71992	0.705851
8.73825	0.692388
8.75659	0.615456
8.77493	0.628919
8.79326	0.601993
8.8116	0.617379
8.82994	0.596223
8.84828	0.613532
8.86661	0.623149
8.88495	0.655845
8.90329	0.573143
8.92162	0.638535
8.93996	0.605839
8.9583	0.609686
8.97663	0.651998
8.99497	0.563527
9.01331	0.534677
9.03164	0.601993
9.04998	0.578913
9.06832	0.519291
9.08665	0.57122
9.10499	0.503904
9.12333	0.515444
9.14167	0.538524
9.16	0.603916
9.17834	0.626995
9.19668	0.54237
9.21501	0.57699
9.23335	0.534677
9.25169	0.563527
9.27002	0.54814
9.28836	0.551987
9.3067	0.613532
9.32503	0.573143
9.34337	0.503904
9.36171	0.511597
9.38005	0.54814
9.39838	0.523137
9.41672	0.563527
9.43506	0.519291
9.45339	0.538524
9.47173	0.484671
9.49007	0.575066
9.5084	0.490441
9.52674	0.538524
9.54508	0.500058
9.56341	0.471208
9.58175	0.478901
9.60009	0.511597
9.61842	0.56545
9.63676	0.521214
9.6551	0.478901
9.67344	0.526984
9.69177	0.580836
9.71011	0.475055
9.72845	0.480825
9.74678	0.484671
9.76512	0.55391
9.78346	0.473132
9.80179	0.488518
9.82013	0.511597
9.83847	0.538524
9.8568	0.394276
9.87514	0.500058
9.89348	0.476978
9.91182	0.555833
9.93015	0.457745
9.94849	0.528907
9.96683	0.486595
9.98516	0.486595
10.0035	0.444282
10.0218	0.440435
10.0402	0.473132
10.0585	0.451975
10.0768	0.480825
10.0952	0.492365
10.1135	0.501981
10.1319	0.503904
10.1502	0.419279
10.1685	0.467362
10.1869	0.451975
10.2052	0.419279
10.2235	0.503904
10.2419	0.555833
10.2602	0.459668
10.2786	0.426972
10.2969	0.463515
10.3152	0.446205
10.3336	0.498134
10.3519	0.503904
10.3702	0.457745
10.3886	0.469285
10.4069	0.490441
10.4252	0.473132
10.4436	0.450052
10.4619	0.498134
10.4803	0.492365
10.4986	0.525061
10.5169	0.473132
10.5353	0.426972
10.5536	0.457745
10.5719	0.440435
10.5903	0.486595
10.6086	0.453899
10.627	0.486595
10.6453	0.469285
10.6636	0.430819
10.682	0.457745
10.7003	0.480825
10.7186	0.455822
10.737	0.434666
10.7553	0.442359
10.7736	0.446205
10.792	0.501981
10.8103	0.407739
10.8287	0.459668
10.847	0.425049
10.8653	0.405816
10.8837	0.446205
10.902	0.442359
10.9203	0.394276
10.9387	0.423126
10.957	0.415433
10.9754	0.436589
10.9937	0.442359
11.012	0.37889
11.0304	0.415433
11.0487	0.411586
11.067	0.457745
11.0854	0.432742
11.1037	0.417356
11.1221	0.413509
11.1404	0.415433
11.1587	0.411586
11.1771	0.400046
11.1954	0.405816
11.2137	0.415433
11.2321	0.3962
11.2504	0.448129
11.2687	0.426972
11.2871	0.442359
11.3054	0.428896
11.3238	0.400046
11.3421	0.467362
11.3604	0.434666
11.3788	0.382736
11.3971	0.423126
11.4154	0.448129
11.4338	0.434666
11.4521	0.428896
11.4705	0.401969
11.4888	0.459668
11.5071	0.401969
11.5255	0.419279
11.5438	0.440435
11.5621	0.409663
11.5805	0.411586
11.5988	0.407739
11.6171	0.401969
11.6355	0.430819
11.6538	0.471208
11.6722	0.444282
11.6905	0.36158
11.7088	0.419279
11.7272	0.401969
11.7455	0.413509
11.7638	0.371197
11.7822	0.451975
11.8005	0.405816
11.8189	0.428896
11.8372	0.369273
11.8555	0.403893
11.8739	0.39043
11.8922	0.38466
11.9105	0.382736
11.9289	0.419279
11.9472	0.413509
11.9655	0.375043
11.9839	0.3962
12.0022	0.386583
12.0206	0.475055
12.0389	0.446205
12.0572	0.369273
12.0756	0.438512
12.0939	0.446205
12.1122	0.415433
12.1306	0.434666
12.1489	0.382736
12.1673	0.400046
12.1856	0.376967
12.2039	0.403893
12.2223	0.440435
12.2406	0.425049
12.2589	0.400046
12.2773	0.444282
12.2956	0.419279
12.3139	0.386583
12.3323	0.450052
12.3506	0.411586
12.369	0.407739
12.3873	0.450052
12.4056	0.455822
12.424	0.465438
12.4423	0.415433
12.4606	0.392353
12.479	0.459668
12.4973	0.488518
12.5157	0.39043
12.534	0.471208
12.5523	0.475055
12.5707	0.515444
12.589	0.500058
12.6073	0.57122
12.6257	0.611609
12.644	0.58276
12.6624	0.648152
12.6807	0.76355
12.699	0.703927
12.7174	0.725084
12.7357	0.869331
12.754	1.05974
12.7724	1.07897
12.7907	1.25014
12.809	1.37131
12.8274	1.47132
12.8457	1.82136
12.8641	2.10794
12.8824	2.30411
12.9007	2.5753
12.9191	2.6003
12.9374	2.73685
12.9557	2.24449
12.9741	1.85791
12.9924	1.41362
13.0108	1.04435
13.0291	0.790476
13.0474	0.646228
13.0658	0.638535
13.0841	0.475055
13.1024	0.517367
13.1208	0.484671
13.1391	0.442359
13.1574	0.388506
13.1758	0.407739
13.1941	0.386583
13.2125	0.440435
13.2308	0.363503
13.2491	0.36735
13.2675	0.411586
13.2858	0.380813
13.3041	0.405816
13.3225	0.394276
13.3408	0.403893
13.3592	0.334654
13.3775	0.394276
13.3958	0.398123
13.4142	0.3962
13.4325	0.34427
13.4508	0.359657
13.4692	0.382736
13.4875	0.315421
13.5058	0.334654
13.5242	0.375043
13.5425	0.39043
13.5609	0.407739
13.5792	0.359657
13.5975	0.321191
13.6159	0.342347
13.6342	0.35581
13.6525	0.338501
13.6709	0.401969
13.6892	0.330807
13.7076	0.357734
13.7259	0.334654
13.7442	0.371197
13.7626	0.39043
13.7809	0.303881
13.7992	0.325038
13.8176	0.380813
13.8359	0.323114
13.8542	0.34427
13.8726	0.34427
13.8909	0.340424
13.9093	0.342347
13.9276	0.35581
13.9459	0.317344
13.9643	0.36158
13.9826	0.330807
14.0009	0.34427
14.0193	0.334654
14.0376	0.342347
14.056	0.365427
14.0743	0.332731
14.0926	0.338501
14.111	0.363503
14.1293	0.313498
14.1476	0.296188
14.166	0.382736
14.1843	0.369273
14.2026	0.332731
14.221	0.394276
14.2393	0.342347
14.2577	0.326961
14.276	0.369273
14.2943	0.340424
14.3127	0.37889
14.331	0.392353
14.3493	0.376967
14.3677	0.351964
14.386	0.35581
14.4044	0.321191
14.4227	0.34427
14.441	0.380813
14.4594	0.38466
14.4777	0.376967
14.496	0.342347
14.5144	0.319268
14.5327	0.36735
14.5511	0.319268
14.5694	0.340424
14.5877	0.37889
14.6061	0.359657
14.6244	0.3962
14.6427	0.409663
14.6611	0.359657
14.6794	0.388506
14.6977	0.326961
14.7161	0.403893
14.7344	0.394276
14.7528	0.415433
14.7711	0.380813
14.7894	0.409663
14.8078	0.405816
14.8261	0.461592
14.8444	0.382736
14.8628	0.436589
14.8811	0.484671
14.8995	0.451975
14.9178	0.446205
14.9361	0.463515
14.9545	0.455822
14.9728	0.423126
14.9911	0.398123
15.0095	0.392353
15.0278	0.403893
15.0461	0.317344
15.0645	0.365427
15.0828	0.34427
15.1012	0.394276
15.1195	0.340424
15.1378	0.305805
15.1562	0.280802
15.1745	0.325038
15.1928	0.348117
15.2112	0.313498
15.2295	0.351964
15.2479	0.35581
15.2662	0.376967
15.2845	0.34427
15.3029	0.313498
15.3212	0.351964
15.3395	0.359657
15.3579	0.357734
15.3762	0.351964
15.3945	0.315421
15.4129	0.305805
15.4312	0.375043
15.4496	0.348117
15.4679	0.365427
15.4862	0.290418
15.5046	0.334654
15.5229	0.37889
15.5412	0.351964
15.5596	0.338501
15.5779	0.348117
15.5963	0.334654
15.6146	0.36158
15.6329	0.323114
15.6513	0.332731
15.6696	0.340424
15.6879	0.309651
15.7063	0.34427
15.7246	0.325038
15.7429	0.380813
15.7613	0.328884
15.7796	0.36158
15.798	0.351964
15.8163	0.37889
15.8346	0.400046
15.853	0.348117
15.8713	0.444282
15.8896	0.403893
15.908	0.434666
15.9263	0.430819
15.9447	0.486595
15.963	0.455822
15.9813	0.473132
15.9997	0.525061
16.018	0.563527
16.0363	0.550063
16.0547	0.58276
16.073	0.638535
16.0914	0.703927
16.1097	0.786629
16.128	0.688541
16.1464	0.748163
16.1647	0.730854
16.183	0.667385
16.2014	0.626995
16.2197	0.55968
16.238	0.550063
16.2564	0.555833
16.2747	0.490441
16.2931	0.453899
16.3114	0.436589
16.3297	0.442359
16.3481	0.369273
16.3664	0.357734
16.3847	0.369273
16.4031	0.317344
16.4214	0.382736
16.4398	0.330807
16.4581	0.340424
16.4764	0.338501
16.4948	0.375043
16.5131	0.34427
16.5314	0.317344
16.5498	0.357734
16.5681	0.300035
16.5864	0.328884
16.6048	0.342347
16.6231	0.351964
16.6415	0.351964
16.6598	0.348117
16.6781	0.351964
16.6965	0.388506
16.7148	0.326961
16.7331	0.371197
16.7515	0.317344
16.7698	0.313498
16.7882	0.357734
16.8065	0.315421
16.8248	0.321191
16.8432	0.313498
16.8615	0.315421
16.8798	0.348117
16.8982	0.36158
16.9165	0.334654
16.9348	0.330807
16.9532	0.369273
16.9715	0.369273
16.9899	0.35004
17.0082	0.328884
17.0265	0.313498
17.0449	0.311574
17.0632	0.346194
17.0815	0.346194
17.0999	0.305805
17.1182	0.348117
17.1366	0.325038
17.1549	0.340424
17.1732	0.34427
17.1916	0.336577
17.2099	0.371197
17.2282	0.376967
17.2466	0.330807
17.2649	0.34427
17.2832	0.36158
17.3016	0.35004
17.3199	0.401969
17.3383	0.353887
17.3566	0.325038
17.3749	0.36158
17.3933	0.321191
17.4116	0.405816
17.4299	0.36735
17.4483	0.36158
17.4666	0.392353
17.485	0.35004
17.5033	0.400046
17.5216	0.401969
17.54	0.423126
17.5583	0.442359
17.5766	0.398123
17.595	0.473132
17.6133	0.509674
17.6316	0.475055
17.65	0.538524
17.6683	0.544294
17.6867	0.607762
17.705	0.626995
17.7233	0.642382
17.7417	0.732777
17.76	0.75778
17.7783	0.794322
17.7967	0.794322
17.815	0.811632
17.8334	0.830865
17.8517	0.719314
17.87	0.607762
17.8884	0.642382
17.9067	0.623149
17.925	0.532754
17.9434	0.534677
17.9617	0.476978
17.9801	0.425049
17.9984	0.448129
18.0167	0.450052
18.0351	0.421202
18.0534	0.407739
18.0717	0.421202
18.0901	0.409663
18.1084	0.37312
18.1267	0.3962
18.1451	0.39043
18.1634	0.428896
18.1818	0.442359
18.2001	0.37312
18.2184	0.401969
18.2368	0.415433
18.2551	0.450052
18.2734	0.430819
18.2918	0.430819
18.3101	0.413509
18.3285	0.440435
18.3468	0.407739
18.3651	0.413509
18.3835	0.426972
18.4018	0.392353
18.4201	0.380813
18.4385	0.405816
18.4568	0.400046
18.4751	0.340424
18.4935	0.38466
18.5118	0.398123
18.5302	0.35581
18.5485	0.388506
18.5668	0.375043
18.5852	0.415433
18.6035	0.388506
18.6218	0.330807
18.6402	0.398123
18.6585	0.351964
18.6769	0.392353
18.6952	0.425049
18.7135	0.409663
18.7319	0.423126
18.7502	0.405816
18.7685	0.369273
18.7869	0.363503
18.8052	0.398123
18.8235	0.36735
18.8419	0.432742
18.8602	0.440435
18.8786	0.346194
18.8969	0.444282
18.9152	0.407739
18.9336	0.436589
18.9519	0.440435
18.9702	0.444282
18.9886	0.436589
19.0069	0.488518
19.0253	0.3962
19.0436	0.413509
19.0619	0.459668
19.0803	0.428896
19.0986	0.430819
19.1169	0.453899
19.1353	0.419279
19.1536	0.432742
19.1719	0.488518
19.1903	0.482748
19.2086	0.501981
19.227	0.496211
19.2453	0.482748
19.2636	0.526984
19.282	0.5366
19.3003	0.557757
19.3186	0.523137
19.337	0.667385
19.3553	0.596223
19.3737	0.575066
19.392	0.601993
19.4103	0.646228
19.4287	0.677001
19.447	0.71739
19.4653	0.651998
19.4837	0.796246
19.502	0.725084
19.5204	0.92703
19.5387	0.886641
19.557	1.15783
19.5754	1.20399
19.5937	1.4694
19.612	1.57711
19.6304	1.96176
19.6487	2.20218
19.667	2.59453
19.6854	3.40616
19.7037	3.98508
19.7221	4.83517
19.7404	6.018
19.7587	7.20083
19.7771	8.32404
19.7954	9.19145
19.8137	9.54341
19.8321	9.11259
19.8504	7.96438
19.8688	6.41036
19.8871	5.01596
19.9054	3.82159
19.9238	2.75801
19.9421	2.20025
19.9604	1.59634
19.9788	1.33862
19.9971	1.05012
20.0154	0.959726
20.0338	0.913567
20.0521	0.844328
20.0705	0.738547
20.0888	0.705851
20.1071	0.596223
20.1255	0.636612
20.1438	0.600069
20.1621	0.534677
20.1805	0.575066
20.1988	0.567373
20.2172	0.53083
20.2355	0.482748
20.2538	0.540447
20.2722	0.484671
20.2905	0.457745
20.3088	0.480825
20.3272	0.482748
20.3455	0.450052
20.3638	0.459668
20.3822	0.484671
20.4005	0.455822
20.4189	0.490441
20.4372	0.457745
20.4555	0.488518
20.4739	0.446205
20.4922	0.430819
20.5105	0.442359
20.5289	0.428896
20.5472	0.446205
20.5656	0.455822
20.5839	0.430819
20.6022	0.423126
20.6206	0.392353
20.6389	0.453899
20.6572	0.492365
20.6756	0.444282
20.6939	0.482748
20.7122	0.482748
20.7306	0.494288
20.7489	0.436589
20.7673	0.459668
20.7856	0.423126
20.8039	0.430819
20.8223	0.444282
20.8406	0.426972
20.8589	0.394276
20.8773	0.461592
20.8956	0.455822
20.914	0.450052
20.9323	0.430819
20.9506	0.440435
20.969	0.532754
20.9873	0.440435
21.0056	0.484671
21.024	0.505828
21.0423	0.490441
21.0607	0.550063
21.079	0.555833
21.0973	0.544294
21.1157	0.567373
21.134	0.569296
21.1523	0.592376
21.1707	0.56545
21.189	0.57122
21.2073	0.667385
21.2257	0.540447
21.244	0.54237
21.2624	0.511597
21.2807	0.544294
21.299	0.503904
21.3174	0.544294
21.3357	0.475055
21.354	0.54814
21.3724	0.426972
21.3907	0.436589
21.4091	0.478901
21.4274	0.546217
21.4457	0.459668
21.4641	0.463515
21.4824	0.53083
21.5007	0.476978
21.5191	0.496211
21.5374	0.478901
21.5557	0.555833
21.5741	0.519291
21.5924	0.486595
21.6108	0.567373
21.6291	0.517367
21.6474	0.605839
21.6658	0.592376
21.6841	0.638535
21.7024	0.663538
21.7208	0.651998
21.7391	0.671231
21.7575	0.782783
21.7758	0.713544
21.7941	0.846251
21.8125	0.919337
21.8308	0.95011
21.8491	1.06743
21.8675	1.12321
21.8858	1.34631
21.9041	1.48863
21.9225	1.81559
21.9408	1.93484
21.9592	2.26372
21.9775	2.49837
21.9958	2.81379
22.0142	3.06574
22.0325	3.30615
22.0508	3.68312
22.0692	3.65234
22.0875	3.63311
22.1059	3.33692
22.1242	2.9388
22.1425	2.60799
22.1609	2.28296
22.1792	2.05601
22.1975	1.84444
22.2159	1.51556
22.2342	1.34054
22.2525	1.24245
22.2709	1.18283
22.2892	1.07512
22.3076	1.06551
22.3259	1.05781
22.3442	1.06358
22.3626	1.09051
22.3809	1.30015
22.3992	1.26938
22.4176	1.47709
22.4359	1.55403
22.4543	1.82136
22.4726	1.81944
22.4909	1.83867
22.5093	1.90407
22.5276	1.75982
22.5459	1.46748
22.5643	1.35208
22.5826	1.17898
22.6009	1.00204
22.6193	0.873178
22.6376	0.786629
22.656	0.72893
22.6743	0.598146
22.6926	0.619302
22.711	0.58276
22.7293	0.532754
22.7476	0.54814
22.766	0.494288
22.7843	0.482748
22.8027	0.494288
22.821	0.415433
22.8393	0.501981
22.8577	0.475055
22.876	0.457745
22.8943	0.430819
22.9127	0.436589
22.931	0.359657
22.9494	0.39043
22.9677	0.375043
22.986	0.405816
23.0044	0.388506
23.0227	0.421202
23.041	0.380813
23.0594	0.365427
23.0777	0.403893
23.096	0.400046
23.1144	0.365427
23.1327	0.392353
23.1511	0.386583
23.1694	0.442359
23.1877	0.411586
23.2061	0.37889
23.2244	0.400046
23.2427	0.386583
23.2611	0.425049
23.2794	0.386583
23.2978	0.419279
23.3161	0.413509
23.3344	0.423126
23.3528	0.392353
23.3711	0.428896
23.3894	0.426972
23.4078	0.38466
23.4261	0.415433
23.4444	0.403893
23.4628	0.398123
23.4811	0.409663
23.4995	0.375043
23.5178	0.415433
23.5361	0.369273
23.5545	0.380813
23.5728	0.375043
23.5911	0.39043
23.6095	0.450052
23.6278	0.467362
23.6462	0.401969
23.6645	0.403893
23.6828	0.480825
23.7012	0.415433
23.7195	0.405816
23.7378	0.409663
23.7562	0.461592
23.7745	0.436589
23.7928	0.475055
23.8112	0.438512
23.8295	0.421202
23.8479	0.388506
23.8662	0.423126
23.8845	0.37889
23.9029	0.394276
23.9212	0.323114
23.9395	0.401969
23.9579	0.403893
23.9762	0.405816
23.9946	0.394276
24.0129	0.36735
24.0312	0.39043
24.0496	0.359657
24.0679	0.405816
24.0862	0.400046
24.1046	0.413509
24.1229	0.436589
24.1412	0.37312
24.1596	0.482748
24.1779	0.451975
24.1963	0.480825
24.2146	0.482748
24.2329	0.473132
24.2513	0.509674
24.2696	0.532754
24.2879	0.540447
24.3063	0.661615
24.3246	0.659691
24.343	0.767396
24.3613	0.828942
24.3796	0.95588
24.398	0.963573
24.4163	1.04435
24.4346	1.21745
24.453	1.30784
24.4713	1.52518
24.4897	1.59249
24.508	1.61942
24.5263	1.56749
24.5447	1.52902
24.563	1.47709
24.5813	1.35593
24.5997	1.17129
24.618	1.10397
24.6363	0.984729
24.6547	0.853945
24.673	0.867408
24.6914	0.651998
24.7097	0.623149
24.728	0.640459
24.7464	0.598146
24.7647	0.598146
24.783	0.592376
24.8014	0.555833
24.8197	0.600069
24.8381	0.569296
24.8564	0.551987
24.8747	0.590453
24.8931	0.550063
24.9114	0.54814
24.9297	0.578913
24.9481	0.54237
24.9664	0.488518
24.9847	0.525061
25.0031	0.486595
25.0214	0.463515
25.0398	0.434666
25.0581	0.453899
25.0764	0.428896
25.0948	0.353887
25.1131	0.407739
25.1314	0.3962
25.1498	0.37889
25.1681	0.363503
25.1865	0.321191
25.2048	0.365427
25.2231	0.317344
25.2415	0.321191
25.2598	0.342347
25.2781	0.296188
25.2965	0.353887
25.3148	0.353887
25.3331	0.315421
25.3515	0.296188
25.3698	0.34427
25.3882	0.273108
25.4065	0.278878
25.4248	0.330807
25.4432	0.315421
25.4615	0.271185
25.4798	0.303881
25.4982	0.321191
25.5165	0.307728
25.5349	0.296188
25.5532	0.346194
25.5715	0.301958
25.5899	0.303881
25.6082	0.307728
25.6265	0.296188
25.6449	0.313498
25.6632	0.261569
25.6815	0.255799
25.6999	0.296188
25.7182	0.309651
25.7366	0.340424
25.7549	0.332731
25.7732	0.309651
25.7916	0.342347
25.8099	0.363503
25.8282	0.413509
25.8466	0.386583
25.8649	0.359657
25.8833	0.415433
25.9016	0.317344
25.9199	0.425049
25.9383	0.401969
25.9566	0.411586
25.9749	0.411586
25.9933	0.453899
26.0116	0.453899
26.0299	0.417356
26.0483	0.440435
26.0666	0.386583
26.085	0.375043
26.1033	0.3962
26.1216	0.307728
26.14	0.36158
26.1583	0.371197
26.1766	0.328884
26.195	0.311574
26.2133	0.290418
26.2317	0.346194
26.25	0.240412
26.2683	0.292341
26.2867	0.328884
26.305	0.315421
26.3233	0.273108
26.3417	0.280802
26.36	0.296188
26.3784	0.286572
26.3967	0.292341
26.415	0.305805
26.4334	0.298111
26.4517	0.276955
26.47	0.276955
26.4884	0.305805
26.5067	0.292341
26.525	0.294265
26.5434	0.301958
26.5617	0.276955
26.5801	0.290418
26.5984	0.282725
26.6167	0.317344
26.6351	0.296188
26.6534	0.298111
26.6717	0.280802
26.6901	0.330807
26.7084	0.294265
26.7268	0.298111
26.7451	0.298111
26.7634	0.326961
26.7818	0.301958
26.8001	0.290418
26.8184	0.319268
26.8368	0.35581
26.8551	0.326961
26.8734	0.35581
26.8918	0.323114
26.9101	0.323114
26.9285	0.328884
26.9468	0.37312
26.9651	0.398123
26.9835	0.336577
27.0018	0.375043
27.0201	0.380813
27.0385	0.35581
27.0568	0.432742
27.0752	0.401969
27.0935	0.446205
27.1118	0.450052
27.1302	0.500058
27.1485	0.459668
27.1668	0.392353
27.1852	0.409663
27.2035	0.394276
27.2218	0.38466
27.2402	0.421202
27.2585	0.369273
27.2769	0.340424
27.2952	0.38466
27.3135	0.342347
27.3319	0.276955
27.3502	0.326961
27.3685	0.334654
27.3869	0.313498
27.4052	0.325038
27.4236	0.36735
27.4419	0.357734
27.4602	0.398123
27.4786	0.411586
27.4969	0.317344
27.5152	0.371197
27.5336	0.392353
27.5519	0.392353
27.5702	0.401969
27.5886	0.432742
27.6069	0.501981
27.6253	0.488518
27.6436	0.557757
27.6619	0.58276
27.6803	0.678924
27.6986	0.700081
27.7169	0.771243
27.7353	0.886641
27.7536	0.882794
27.772	1.00781
27.7903	1.06551
27.8086	1.01166
27.827	1.13282
27.8453	1.00012
27.8636	0.952033
27.882	0.905874
27.9003	0.780859
27.9187	0.682771
27.937	0.655845
27.9553	0.573143
27.9737	0.521214
27.992	0.515444
28.0103	0.465438
28.0287	0.471208
28.047	0.425049
28.0653	0.451975
28.0837	0.411586
28.102	0.409663
28.1204	0.421202
28.1387	0.400046
28.157	0.332731
28.1754	0.346194
28.1937	0.342347
28.212	0.342347
28.2304	0.37889
28.2487	0.321191
28.2671	0.357734
28.2854	0.348117
28.3037	0.346194
28.3221	0.332731
28.3404	0.338501
28.3587	0.37889
28.3771	0.292341
28.3954	0.325038
28.4137	0.369273
28.4321	0.346194
28.4504	0.330807
28.4688	0.303881
28.4871	0.353887
28.5054	0.348117
28.5238	0.336577
28.5421	0.363503
28.5604	0.413509
28.5788	0.359657
28.5971	0.450052
28.6155	0.415433
28.6338	0.525061
28.6521	0.482748
28.6705	0.551987
28.6888	0.603916
28.7071	0.657768
28.7255	0.742393
28.7438	0.742393
28.7621	0.913567
28.7805	1.00589
28.7988	1.14244
28.8172	1.18283
28.8355	1.19245
28.8538	1.19437
28.8722	1.12898
28.8905	1.00589
28.9088	0.907797
28.9272	0.869331
28.9455	0.802016
28.9639	0.667385
28.9822	0.601993
29.0005	0.54814
29.0189	0.507751
29.0372	0.450052
29.0555	0.411586
29.0739	0.417356
29.0922	0.357734
29.1105	0.36158
29.1289	0.311574
29.1472	0.309651
29.1656	0.300035
29.1839	0.328884
29.2022	0.276955
29.2206	0.298111
29.2389	0.284648
29.2572	0.284648
29.2756	0.311574
29.2939	0.244259
29.3123	0.269262
29.3306	0.280802
29.3489	0.246182
29.3673	0.269262
29.3856	0.267339
29.4039	0.240412
29.4223	0.225026
29.4406	0.261569
29.459	0.261569
29.4773	0.215409
29.4956	0.253875
29.514	0.226949
29.5323	0.226949
29.5506	0.261569
29.569	0.255799
29.5873	0.234642
29.6056	0.251952
29.624	0.271185
29.6423	0.273108
29.6607	0.280802
29.679	0.1981
29.6973	0.317344
29.7157	0.253875
29.734	0.248106
29.7523	0.240412
29.7707	0.319268
29.789	0.246182
29.8074	0.278878
29.8257	0.259645
29.844	0.311574
29.8624	0.248106
29.8807	0.298111
29.899	0.246182
29.9174	0.290418
29.9357	0.276955
29.954	0.232719
29.9724	0.250029
29.9907	0.284648
30.0091	0.248106
30.0274	0.242336
30.0457	0.225026
30.0641	0.292341
30.0824	0.248106
30.1007	0.259645
30.1191	0.275032
30.1374	0.296188
30.1558	0.257722
30.1741	0.271185
30.1924	0.267339
30.2108	0.253875
30.2291	0.259645
30.2474	0.280802
30.2658	0.225026
30.2841	0.226949
30.3024	0.232719
30.3208	0.213486
30.3391	0.207716
30.3575	0.215409
30.3758	0.205793
30.3941	0.211563
30.4125	0.242336
30.4308	0.251952
30.4491	0.215409
30.4675	0.194253
30.4858	0.201946
30.5042	0.225026
30.5225	0.205793
30.5408	0.182713
30.5592	0.211563
30.5775	0.207716
30.5958	0.1981
30.6142	0.211563
30.6325	0.188483
30.6508	0.244259
30.6692	0.182713
30.6875	0.205793
30.7059	0.200023
30.7242	0.250029
30.7425	0.205793
30.7609	0.18079
30.7792	0.16348
30.7975	0.215409
30.8159	0.226949
30.8342	0.205793
30.8526	0.213486
30.8709	0.217333
30.8892	0.184637
30.9076	0.20964
30.9259	0.225026
30.9442	0.19233
30.9626	0.269262
30.9809	0.259645
30.9992	0.251952
31.0176	0.226949
31.0359	0.201946
31.0543	0.251952
31.0726	0.232719
31.0909	0.201946
31.1093	0.213486
31.1276	0.250029
31.1459	0.255799
31.1643	0.242336
31.1826	0.211563
31.201	0.250029
31.2193	0.246182
31.2376	0.215409
31.256	0.19233
31.2743	0.211563
31.2926	0.20964
31.311	0.215409
31.3293	0.230796
31.3477	0.171174
31.366	0.213486
31.3843	0.211563
31.4027	0.232719
31.421	0.228873
31.4393	0.261569
31.4577	0.261569
31.476	0.259645
31.4943	0.240412
31.5127	0.278878
31.531	0.250029
31.5494	0.292341
31.5677	0.294265
31.586	0.311574
31.6044	0.294265
31.6227	0.334654
31.641	0.37889
31.6594	0.409663
31.6777	0.403893
31.6961	0.37312
31.7144	0.351964
31.7327	0.403893
31.7511	0.380813
31.7694	0.375043
31.7877	0.311574
31.8061	0.376967
31.8244	0.386583
31.8427	0.34427
31.8611	0.307728
31.8794	0.298111
31.8978	0.301958
31.9161	0.326961
31.9344	0.323114
31.9528	0.259645
31.9711	0.296188
31.9894	0.315421
32.0078	0.288495
32.0261	0.326961
32.0445	0.300035
32.0628	0.282725
32.0811	0.288495
32.0995	0.280802
32.1178	0.300035
32.1361	0.255799
32.1545	0.238489
32.1728	0.257722
32.1911	0.215409
32.2095	0.248106
32.2278	0.236566
32.2462	0.246182
32.2645	0.194253
32.2828	0.215409
32.3012	0.234642
32.3195	0.232719
32.3378	0.182713
32.3562	0.219256
32.3745	0.200023
32.3929	0.18656
32.4112	0.18656
32.4295	0.211563
32.4479	0.188483
32.4662	0.18079
32.4845	0.188483
32.5029	0.215409
32.5212	0.217333
32.5395	0.194253
32.5579	0.194253
32.5762	0.178867
32.5946	0.265415
32.6129	0.165404
32.6312	0.244259
32.6496	0.223103
32.6679	0.207716
32.6862	0.238489
32.7046	0.19233
32.7229	0.248106
32.7413	0.234642
32.7596	0.217333
32.7779	0.242336
32.7963	0.225026
32.8146	0.259645
32.8329	0.257722
32.8513	0.284648
32.8696	0.244259
32.888	0.253875
32.9063	0.257722
32.9246	0.236566
32.943	0.275032
32.9613	0.240412
32.9796	0.221179
32.998	0.221179
33.0163	0.238489
33.0346	0.226949
33.053	0.221179
33.0713	0.1981
33.0897	0.20387
33.108	0.1981
33.1263	0.18079
33.1447	0.194253
33.163	0.173097
33.1813	0.146171
33.1997	0.221179
33.218	0.190407
33.2364	0.20964
33.2547	0.182713
33.273	0.201946
33.2914	0.217333
33.3097	0.215409
33.328	0.188483
33.3464	0.165404
33.3647	0.173097
33.383	0.200023
33.4014	0.194253
33.4197	0.18079
33.4381	0.215409
33.4564	0.19233
33.4747	0.259645
33.4931	0.213486
33.5114	0.219256
33.5297	0.200023
33.5481	0.20387
33.5664	0.16348
33.5848	0.201946
33.6031	0.236566
33.6214	0.184637
33.6398	0.190407
33.6581	0.200023
33.6764	0.167327
33.6948	0.18656
33.7131	0.194253
33.7314	0.194253
33.7498	0.1981
33.7681	0.18656
33.7865	0.194253
33.8048	0.194253
33.8231	0.223103
33.8415	0.19233
33.8598	0.194253
33.8781	0.18656
33.8965	0.201946
33.9148	0.184637
33.9332	0.215409
33.9515	0.201946
33.9698	0.219256
33.9882	0.228873
34.0065	0.225026
34.0248	0.234642
34.0432	0.19233
34.0615	0.213486
34.0798	0.232719
34.0982	0.215409
34.1165	0.228873
34.1349	0.240412
34.1532	0.250029
34.1715	0.301958
34.1899	0.246182
34.2082	0.307728
34.2265	0.365427
34.2449	0.37312
34.2632	0.39043
34.2816	0.400046
34.2999	0.484671
34.3182	0.561603
34.3366	0.525061
34.3549	0.634689
34.3732	0.651998
34.3916	0.57699
34.4099	0.659691
34.4282	0.653922
34.4466	0.623149
34.4649	0.519291
34.4833	0.573143
34.5016	0.550063
34.5199	0.417356
34.5383	0.403893
34.5566	0.338501
34.5749	0.317344
34.5933	0.313498
34.6116	0.321191
34.63	0.278878
34.6483	0.271185
34.6666	0.244259
34.685	0.269262
34.7033	0.211563
34.7216	0.267339
34.74	0.211563
34.7583	0.226949
34.7767	0.226949
34.795	0.205793
34.8133	0.219256
34.8317	0.211563
34.85	0.207716
34.8683	0.219256
34.8867	0.194253
34.905	0.221179
34.9233	0.221179
34.9417	0.190407
34.96	0.223103
34.9784	0.173097
34.9967	0.16925
35.015	0.217333
35.0334	0.17502
35.0517	0.211563
35.07	0.201946
35.0884	0.188483
35.1067	0.16925
35.1251	0.19233
35.1434	0.16925
35.1617	0.190407
35.1801	0.16925
35.1984	0.17502
35.2167	0.178867
35.2351	0.190407
35.2534	0.18079
35.2717	0.215409
35.2901	0.184637
35.3084	0.228873
35.3268	0.190407
35.3451	0.184637
35.3634	0.211563
35.3818	0.1981
35.4001	0.18079
35.4184	0.171174
35.4368	0.165404
35.4551	0.176943
35.4735	0.188483
35.4918	0.182713
35.5101	0.221179
35.5285	0.232719
35.5468	0.226949
35.5651	0.200023
35.5835	0.211563
35.6018	0.213486
35.6201	0.221179
35.6385	0.211563
35.6568	0.196176
35.6752	0.205793
35.6935	0.16925
35.7118	0.230796
35.7302	0.267339
35.7485	0.219256
35.7668	0.226949
35.7852	0.275032
35.8035	0.228873
35.8219	0.232719
35.8402	0.257722
35.8585	0.238489
35.8769	0.215409
35.8952	0.284648
35.9135	0.234642
35.9319	0.300035
35.9502	0.271185
35.9685	0.313498
35.9869	0.386583
36.0052	0.382736
36.0236	0.444282
36.0419	0.496211
36.0602	0.540447
36.0786	0.5366
36.0969	0.526984
36.1152	0.534677
36.1336	0.417356
36.1519	0.421202
36.1703	0.440435
36.1886	0.332731
36.2069	0.351964
36.2253	0.34427
36.2436	0.305805
36.2619	0.332731
36.2803	0.284648
36.2986	0.280802
36.317	0.300035
36.3353	0.280802
36.3536	0.261569
36.372	0.261569
36.3903	0.259645
36.4086	0.242336
36.427	0.236566
36.4453	0.223103
36.4636	0.242336
36.482	0.188483
36.5003	0.207716
36.5187	0.230796
36.537	0.223103
36.5553	0.234642
36.5737	0.217333
36.592	0.20387
36.6103	0.188483
36.6287	0.18079
36.647	0.200023
36.6654	0.207716
36.6837	0.18079
36.702	0.211563
36.7204	0.184637
36.7387	0.194253
36.757	0.18656
36.7754	0.217333
36.7937	0.188483
36.812	0.190407
36.8304	0.201946
36.8487	0.1981
36.8671	0.155787
36.8854	0.1981
36.9037	0.167327
36.9221	0.213486
36.9404	0.182713
36.9587	0.194253
36.9771	0.173097
36.9954	0.1981
37.0138	0.207716
37.0321	0.207716
37.0504	0.205793
37.0688	0.176943
37.0871	0.219256
37.1054	0.211563
37.1238	0.221179
37.1421	0.255799
37.1604	0.215409
37.1788	0.236566
37.1971	0.20964
37.2155	0.205793
37.2338	0.225026
37.2521	0.182713
37.2705	0.20387
37.2888	0.188483
37.3071	0.20387
37.3255	0.207716
37.3438	0.194253
37.3622	0.171174
37.3805	0.176943
37.3988	0.20387
37.4172	0.16348
37.4355	0.20387
37.4538	0.184637
37.4722	0.194253
37.4905	0.194253
37.5088	0.173097
37.5272	0.148094
37.5455	0.17502
37.5639	0.173097
37.5822	0.19233
37.6005	0.16925
37.6189	0.184637
37.6372	0.165404
37.6555	0.184637
37.6739	0.159634
37.6922	0.167327
37.7106	0.19233
37.7289	0.144247
37.7472	0.161557
37.7656	0.16348
37.7839	0.161557
37.8022	0.178867
37.8206	0.173097
37.8389	0.144247
37.8573	0.17502
37.8756	0.167327
37.8939	0.17502
37.9123	0.184637
37.9306	0.190407
37.9489	0.201946
37.9673	0.173097
37.9856	0.223103
38.0039	0.171174
38.0223	0.161557
38.0406	0.18656
38.059	0.153864
38.0773	0.200023
38.0956	0.171174
38.114	0.167327
38.1323	0.17502
38.1506	0.171174
38.169	0.140401
38.1873	0.190407
38.2057	0.173097
38.224	0.142324
38.2423	0.144247
38.2607	0.184637
38.279	0.16348
38.2973	0.161557
38.3157	0.18079
38.334	0.190407
38.3523	0.161557
38.3707	0.123091
38.389	0.155787
38.4074	0.171174
38.4257	0.17502
38.444	0.171174
38.4624	0.159634
38.4807	0.171174
38.499	0.18079
38.5174	0.165404
38.5357	0.128861
38.5541	0.178867
38.5724	0.176943
38.5907	0.159634
38.6091	0.17502
38.6274	0.167327
38.6457	0.176943
38.6641	0.184637
38.6824	0.155787
38.7007	0.148094
38.7191	0.17502
38.7374	0.16348
38.7558	0.190407
38.7741	0.1981
38.7924	0.188483
38.8108	0.157711
38.8291	0.194253
38.8474	0.188483
38.8658	0.182713
38.8841	0.18656
38.9025	0.165404
38.9208	0.167327
38.9391	0.167327
38.9575	0.188483
38.9758	0.165404
38.9941	0.188483
39.0125	0.144247
39.0308	0.18079
39.0491	0.173097
39.0675	0.19233
39.0858	0.19233
39.1042	0.196176
39.1225	0.16925
39.1408	0.182713
39.1592	0.194253
39.1775	0.18079
39.1958	0.188483
39.2142	0.19233
39.2325	0.157711
39.2509	0.188483
39.2692	0.200023
39.2875	0.200023
39.3059	0.190407
39.3242	0.196176
39.3425	0.18079
39.3609	0.221179
39.3792	0.20964
39.3975	0.265415
39.4159	0.246182
39.4342	0.244259
39.4526	0.226949
39.4709	0.282725
39.4892	0.228873
39.5076	0.253875
39.5259	0.278878
39.5442	0.221179
39.5626	0.255799
39.5809	0.246182
39.5993	0.215409
39.6176	0.244259
39.6359	0.221179
39.6543	0.184637
39.6726	0.18079
39.6909	0.215409
39.7093	0.19233
39.7276	0.221179
39.746	0.16925
39.7643	0.219256
39.7826	0.1981
39.801	0.18656
39.8193	0.20964
39.8376	0.18079
39.856	0.211563
39.8743	0.205793
39.8926	0.18656
39.911	0.196176
39.9293	0.18079
39.9477	0.225026
39.966	0.225026
39.9843	0.20964
40.0027	0.188483
40.021	0.1981
40.0393	0.1981
40.0577	0.176943
40.076	0.226949
40.0944	0.246182
40.1127	0.238489
40.131	0.20964
40.1494	0.213486
40.1677	0.275032
40.186	0.298111
40.2044	0.34427
40.2227	0.325038
40.241	0.365427
40.2594	0.338501
40.2777	0.38466
40.2961	0.359657
40.3144	0.342347
40.3327	0.321191
40.3511	0.290418
40.3694	0.336577
40.3877	0.332731
40.4061	0.273108
40.4244	0.251952
40.4428	0.242336
40.4611	0.261569
40.4794	0.219256
40.4978	0.194253
40.5161	0.20964
40.5344	0.215409
[truncated: 1,056 more rows]

## Sheet: Heating 35 °C
2theta	Intensity
3.89731	1.42324
3.91565	1.53287
3.93399	1.45594
3.95232	1.50787
3.97066	1.49248
3.989	1.42709
4.00733	1.38093
4.02567	1.40401
4.04401	1.35593
4.06234	1.50594
4.08068	1.42324
4.09902	1.37131
4.11735	1.40401
4.13569	1.33477
4.15403	1.40785
4.17237	1.43093
4.1907	1.304
4.20904	1.28861
4.22738	1.32131
4.24571	1.32515
4.26405	1.30784
4.28239	1.44247
4.30072	1.31554
4.31906	1.31938
4.3374	1.34054
4.35573	1.33477
4.37407	1.33477
4.39241	1.23091
4.41075	1.28284
4.42908	1.3617
4.44742	1.27515
4.46576	1.19245
4.48409	1.19822
4.50243	1.28476
4.52077	1.25784
4.5391	1.32131
4.55744	1.34439
4.57578	1.26168
4.59411	1.24822
4.61245	1.20975
4.63079	1.25014
4.64913	1.2386
4.66746	1.2136
4.6858	1.14436
4.70414	1.23283
4.72247	1.21937
4.74081	1.25591
4.75915	1.24822
4.77748	1.25399
4.79582	1.27515
4.81416	1.17514
4.83249	1.20399
4.85083	1.17706
4.86917	1.20206
4.8875	1.20014
4.90584	1.18475
4.92418	1.18091
4.94252	1.15206
4.96085	1.20206
4.97919	1.17706
4.99753	1.11551
5.01586	1.18668
5.0342	1.18091
5.05254	1.13282
5.07087	1.06743
5.08921	1.15398
5.10755	1.12321
5.12588	1.08859
5.14422	1.10205
5.16256	1.12898
5.1809	1.12898
5.19923	1.13667
5.21757	1.20014
5.23591	1.11936
5.25424	1.11551
5.27258	1.16552
5.29092	1.15783
5.30925	1.14436
5.32759	1.11936
5.34593	1.10205
5.36426	1.18283
5.3826	1.15013
5.40094	1.12898
5.41927	1.05974
5.43761	1.10205
5.45595	1.12513
5.47429	1.17514
5.49262	1.08282
5.51096	1.05974
5.5293	1.01166
5.54763	1.01166
5.56597	1.10782
5.58431	1.09628
5.60264	1.02896
5.62098	1.06743
5.63932	1.03666
5.65765	1.05589
5.67599	1.05397
5.69433	1.00396
5.71267	1.03858
5.731	1.05974
5.74934	1.05781
5.76768	1.08089
5.78601	1.12128
5.80435	1.03858
5.82269	1.06551
5.84102	1.09243
5.85936	1.08666
5.8777	1.09243
5.89603	1.07897
5.91437	1.12128
5.93271	1.0982
5.95104	1.1886
5.96938	1.12321
5.98772	1.12705
6.00606	1.10397
6.02439	1.07897
6.04273	1.18475
6.06107	1.17514
6.0794	1.17898
6.09774	1.1636
6.11608	1.12321
6.13441	1.27899
6.15275	1.29053
6.17109	1.3617
6.18942	1.31169
6.20776	1.41747
6.2261	1.35016
6.24444	1.39824
6.26277	1.40401
6.28111	1.57903
6.29945	1.45209
6.31778	1.53095
6.33612	1.66173
6.35446	1.60018
6.37279	1.77136
6.39113	1.65211
6.40947	1.71558
6.4278	1.77905
6.44614	1.81175
6.46448	2.00023
6.48282	1.98677
6.50115	2.22141
6.51949	2.07139
6.53783	2.21756
6.55616	2.38104
6.5745	2.52529
6.59284	2.57337
6.61117	2.75224
6.62951	2.9965
6.64785	3.13498
6.66618	3.29269
6.68452	3.41578
6.70286	3.75043
6.72119	3.91776
6.73953	4.17548
6.75787	4.48706
6.77621	4.69093
6.79454	4.96788
6.81288	5.27946
6.83122	5.91607
6.84955	6.09301
6.86789	6.73924
6.88623	6.99119
6.90456	7.84129
6.9229	8.24326
6.94124	8.80294
6.95957	9.67227
6.97791	10.7051
6.99625	11.4456
7.01459	12.7188
7.03292	14.2497
7.05126	15.3787
7.0696	16.875
7.08793	18.5406
7.10627	20.235
7.12461	21.8506
7.14294	24.4105
7.16128	26.2223
7.17962	29.5207
7.19795	31.771
7.21629	35.106
7.23463	39.0468
7.25296	44.0359
7.2713	49.123
7.28964	55.9738
7.30798	63.565
7.32631	73.8335
7.34465	84.5809
7.36299	97.8594
7.38132	113.153
7.39966	127.592
7.418	140.278
7.43633	142.945
7.45467	132.083
7.47301	107.245
7.49134	80.8555
7.50968	59.4088
7.52802	43.1242
7.54636	30.2881
7.56469	22.5199
7.58303	17.8021
7.60137	14.5459
7.6197	10.907
7.63804	8.22787
7.65638	5.9026
7.67471	4.41782
7.69305	3.47155
7.71139	2.92534
7.72972	2.68685
7.74806	2.44644
7.7664	2.15217
7.78473	2.06755
7.80307	1.89445
7.82141	1.7252
7.83975	1.60403
7.85808	1.63288
7.87642	1.50402
7.89476	1.54249
7.91309	1.39247
7.93143	1.25399
7.94977	1.34246
7.9681	1.22899
7.98644	1.28284
8.00478	1.18091
8.02311	1.0155
8.04145	1.03089
8.05979	1.05204
8.07813	0.959726
8.09646	1.00396
8.1148	0.882794
8.13314	0.975113
8.15147	0.825095
8.16981	0.930877
8.18815	0.859715
8.20648	0.857791
8.22482	0.798169
8.24316	0.76355
8.26149	0.773166
8.27983	0.803939
8.29817	0.767396
8.3165	0.796246
8.33484	0.748163
8.35318	0.773166
8.37152	0.790476
8.38985	0.782783
8.40819	0.705851
8.42653	0.759703
8.44486	0.72893
8.4632	0.651998
8.48154	0.678924
8.49987	0.736623
8.51821	0.686618
8.53655	0.640459
8.55488	0.630842
8.57322	0.688541
8.59156	0.605839
8.6099	0.609686
8.62823	0.655845
8.64657	0.586606
8.66491	0.596223
8.68324	0.640459
8.70158	0.584683
8.71992	0.653922
8.73825	0.625072
8.75659	0.638535
8.77493	0.601993
8.79326	0.609686
8.8116	0.615456
8.82994	0.603916
8.84828	0.54814
8.86661	0.580836
8.88495	0.642382
8.90329	0.546217
8.92162	0.651998
8.93996	0.55391
8.9583	0.567373
8.97663	0.603916
8.99497	0.57122
9.01331	0.613532
9.03164	0.623149
9.04998	0.600069
9.06832	0.55968
9.08665	0.55968
9.10499	0.53083
9.12333	0.540447
9.14167	0.550063
9.16	0.488518
9.17834	0.521214
9.19668	0.557757
9.21501	0.54237
9.23335	0.534677
9.25169	0.505828
9.27002	0.575066
9.28836	0.513521
9.3067	0.534677
9.32503	0.546217
9.34337	0.492365
9.36171	0.544294
9.38005	0.519291
9.39838	0.540447
9.41672	0.526984
9.43506	0.54814
9.45339	0.57122
9.47173	0.588529
9.49007	0.505828
9.5084	0.521214
9.52674	0.521214
9.54508	0.509674
9.56341	0.519291
9.58175	0.511597
9.60009	0.546217
9.61842	0.511597
9.63676	0.534677
9.6551	0.523137
9.67344	0.488518
9.69177	0.551987
9.71011	0.459668
9.72845	0.482748
9.74678	0.467362
9.76512	0.507751
9.78346	0.5366
9.80179	0.517367
9.82013	0.569296
9.83847	0.473132
9.8568	0.450052
9.87514	0.503904
9.89348	0.517367
9.91182	0.480825
9.93015	0.475055
9.94849	0.55968
9.96683	0.457745
9.98516	0.471208
10.0035	0.496211
10.0218	0.486595
10.0402	0.490441
10.0585	0.461592
10.0768	0.473132
10.0952	0.467362
10.1135	0.467362
10.1319	0.467362
10.1502	0.457745
10.1685	0.507751
10.1869	0.457745
10.2052	0.428896
10.2235	0.475055
10.2419	0.432742
10.2602	0.478901
10.2786	0.486595
10.2969	0.453899
10.3152	0.426972
10.3336	0.448129
10.3519	0.467362
10.3702	0.457745
10.3886	0.463515
10.4069	0.467362
10.4252	0.432742
10.4436	0.430819
10.4619	0.425049
10.4803	0.450052
10.4986	0.436589
10.5169	0.428896
10.5353	0.417356
10.5536	0.484671
10.5719	0.459668
10.5903	0.438512
10.6086	0.450052
10.627	0.463515
10.6453	0.417356
10.6636	0.467362
10.682	0.459668
10.7003	0.467362
10.7186	0.465438
10.737	0.425049
10.7553	0.476978
10.7736	0.423126
10.792	0.463515
10.8103	0.38466
10.8287	0.426972
10.847	0.409663
10.8653	0.35004
10.8837	0.386583
10.902	0.465438
10.9203	0.430819
10.9387	0.492365
10.957	0.34427
10.9754	0.492365
10.9937	0.476978
11.012	0.411586
11.0304	0.428896
11.0487	0.478901
11.067	0.451975
11.0854	0.430819
11.1037	0.438512
11.1221	0.376967
11.1404	0.426972
11.1587	0.465438
11.1771	0.36735
11.1954	0.457745
11.2137	0.426972
11.2321	0.419279
11.2504	0.440435
11.2687	0.448129
11.2871	0.37889
11.3054	0.459668
11.3238	0.444282
11.3421	0.440435
11.3604	0.465438
11.3788	0.423126
11.3971	0.448129
11.4154	0.38466
11.4338	0.35581
11.4521	0.421202
11.4705	0.392353
11.4888	0.428896
11.5071	0.471208
11.5255	0.455822
11.5438	0.398123
11.5621	0.403893
11.5805	0.3962
11.5988	0.3962
11.6171	0.353887
11.6355	0.446205
11.6538	0.413509
11.6722	0.400046
11.6905	0.461592
11.7088	0.417356
11.7272	0.434666
11.7455	0.442359
11.7638	0.403893
11.7822	0.38466
11.8005	0.37312
11.8189	0.382736
11.8372	0.463515
11.8555	0.409663
11.8739	0.434666
11.8922	0.392353
11.9105	0.394276
11.9289	0.450052
11.9472	0.500058
11.9655	0.459668
11.9839	0.411586
12.0022	0.392353
12.0206	0.417356
12.0389	0.388506
12.0572	0.400046
12.0756	0.407739
12.0939	0.363503
12.1122	0.405816
12.1306	0.415433
12.1489	0.380813
12.1673	0.39043
12.1856	0.451975
12.2039	0.39043
12.2223	0.430819
12.2406	0.463515
12.2589	0.380813
12.2773	0.376967
12.2956	0.453899
12.3139	0.469285
12.3323	0.425049
12.3506	0.423126
12.369	0.432742
12.3873	0.419279
12.4056	0.465438
12.424	0.53083
12.4423	0.448129
12.4606	0.480825
12.479	0.476978
12.4973	0.515444
12.5157	0.465438
12.534	0.482748
12.5523	0.488518
12.5707	0.478901
12.589	0.538524
12.6073	0.621226
12.6257	0.605839
12.644	0.609686
12.6624	0.684694
12.6807	0.742393
12.699	0.732777
12.7174	0.828942
12.7357	1.01743
12.754	1.0155
12.7724	1.15206
12.7907	1.30592
12.809	1.58287
12.8274	1.75597
12.8457	2.00792
12.8641	2.15025
12.8824	2.47913
12.9007	2.61569
12.9191	2.56953
12.9374	2.22333
12.9557	1.77713
12.9741	1.38093
12.9924	0.988576
13.0108	0.842405
13.0291	0.673155
13.0474	0.546217
13.0658	0.482748
13.0841	0.54814
13.1024	0.511597
13.1208	0.432742
13.1391	0.461592
13.1574	0.398123
13.1758	0.446205
13.1941	0.463515
13.2125	0.453899
13.2308	0.382736
13.2491	0.386583
13.2675	0.35581
13.2858	0.421202
13.3041	0.398123
13.3225	0.394276
13.3408	0.348117
13.3592	0.36158
13.3775	0.36735
13.3958	0.369273
13.4142	0.388506
13.4325	0.39043
13.4508	0.326961
13.4692	0.365427
13.4875	0.37889
13.5058	0.39043
13.5242	0.394276
13.5425	0.34427
13.5609	0.382736
13.5792	0.309651
13.5975	0.371197
13.6159	0.36158
13.6342	0.363503
13.6525	0.365427
13.6709	0.330807
13.6892	0.37889
13.7076	0.359657
13.7259	0.326961
13.7442	0.371197
13.7626	0.342347
13.7809	0.369273
13.7992	0.353887
13.8176	0.407739
13.8359	0.35581
13.8542	0.380813
13.8726	0.311574
13.8909	0.313498
13.9093	0.398123
13.9276	0.328884
13.9459	0.369273
13.9643	0.369273
13.9826	0.375043
14.0009	0.351964
14.0193	0.338501
14.0376	0.328884
14.056	0.363503
14.0743	0.388506
14.0926	0.336577
14.111	0.380813
14.1293	0.338501
14.1476	0.400046
14.166	0.332731
14.1843	0.375043
14.2026	0.319268
14.221	0.36735
14.2393	0.303881
14.2577	0.375043
14.276	0.36735
14.2943	0.348117
14.3127	0.338501
14.331	0.388506
14.3493	0.382736
14.3677	0.342347
14.386	0.405816
14.4044	0.34427
14.4227	0.388506
14.441	0.353887
14.4594	0.351964
14.4777	0.336577
14.496	0.375043
14.5144	0.34427
14.5327	0.386583
14.5511	0.375043
14.5694	0.334654
14.5877	0.382736
14.6061	0.394276
14.6244	0.37312
14.6427	0.394276
14.6611	0.382736
14.6794	0.36735
14.6977	0.313498
14.7161	0.394276
14.7344	0.446205
14.7528	0.394276
14.7711	0.426972
14.7894	0.436589
14.8078	0.411586
14.8261	0.444282
14.8444	0.498134
14.8628	0.415433
14.8811	0.519291
14.8995	0.505828
14.9178	0.505828
14.9361	0.436589
14.9545	0.453899
14.9728	0.407739
14.9911	0.392353
15.0095	0.34427
15.0278	0.3962
15.0461	0.346194
15.0645	0.330807
15.0828	0.403893
15.1012	0.348117
15.1195	0.353887
15.1378	0.35004
15.1562	0.332731
15.1745	0.348117
15.1928	0.340424
15.2112	0.34427
15.2295	0.351964
15.2479	0.348117
15.2662	0.290418
15.2845	0.342347
15.3029	0.336577
15.3212	0.363503
15.3395	0.346194
15.3579	0.323114
15.3762	0.37312
15.3945	0.36735
15.4129	0.359657
15.4312	0.315421
15.4496	0.342347
15.4679	0.300035
15.4862	0.346194
15.5046	0.348117
15.5229	0.284648
15.5412	0.317344
15.5596	0.307728
15.5779	0.386583
15.5963	0.325038
15.6146	0.346194
15.6329	0.326961
15.6513	0.371197
15.6696	0.330807
15.6879	0.376967
15.7063	0.332731
15.7246	0.323114
15.7429	0.388506
15.7613	0.417356
15.7796	0.376967
15.798	0.37889
15.8163	0.392353
15.8346	0.413509
15.853	0.376967
15.8713	0.403893
15.8896	0.417356
15.908	0.473132
15.9263	0.450052
15.9447	0.480825
15.963	0.494288
15.9813	0.575066
15.9997	0.609686
16.018	0.56545
16.0363	0.613532
16.0547	0.711621
16.073	0.690464
16.0914	0.813555
16.1097	0.72316
16.128	0.692388
16.1464	0.748163
16.1647	0.642382
16.183	0.651998
16.2014	0.626995
16.2197	0.53083
16.238	0.482748
16.2564	0.521214
16.2747	0.442359
16.2931	0.413509
16.3114	0.438512
16.3297	0.432742
16.3481	0.407739
16.3664	0.411586
16.3847	0.388506
16.4031	0.401969
16.4214	0.35004
16.4398	0.365427
16.4581	0.359657
16.4764	0.375043
16.4948	0.415433
16.5131	0.363503
16.5314	0.317344
16.5498	0.338501
16.5681	0.375043
16.5864	0.353887
16.6048	0.336577
16.6231	0.348117
16.6415	0.313498
16.6598	0.386583
16.6781	0.340424
16.6965	0.398123
16.7148	0.342347
16.7331	0.375043
16.7515	0.307728
16.7698	0.380813
16.7882	0.348117
16.8065	0.315421
16.8248	0.340424
16.8432	0.36158
16.8615	0.321191
16.8798	0.351964
16.8982	0.348117
16.9165	0.332731
16.9348	0.290418
16.9532	0.421202
16.9715	0.34427
16.9899	0.359657
17.0082	0.342347
17.0265	0.340424
17.0449	0.300035
17.0632	0.37312
17.0815	0.346194
17.0999	0.336577
17.1182	0.401969
17.1366	0.382736
17.1549	0.35004
17.1732	0.342347
17.1916	0.323114
17.2099	0.398123
17.2282	0.336577
17.2466	0.348117
17.2649	0.321191
17.2832	0.319268
17.3016	0.357734
17.3199	0.37312
17.3383	0.398123
17.3566	0.319268
17.3749	0.348117
17.3933	0.338501
17.4116	0.346194
17.4299	0.369273
17.4483	0.36158
17.4666	0.371197
17.485	0.365427
17.5033	0.411586
17.5216	0.423126
17.54	0.440435
17.5583	0.467362
17.5766	0.475055
17.595	0.453899
17.6133	0.521214
17.6316	0.501981
17.65	0.540447
17.6683	0.609686
17.6867	0.659691
17.705	0.661615
17.7233	0.755856
17.7417	0.780859
17.76	0.828942
17.7783	0.819325
17.7967	0.840482
17.815	0.780859
17.8334	0.677001
17.8517	0.702004
17.87	0.657768
17.8884	0.628919
17.9067	0.56545
17.925	0.525061
17.9434	0.511597
17.9617	0.450052
17.9801	0.432742
17.9984	0.461592
18.0167	0.440435
18.0351	0.444282
18.0534	0.419279
18.0717	0.407739
18.0901	0.423126
18.1084	0.417356
18.1267	0.382736
18.1451	0.375043
18.1634	0.411586
18.1818	0.467362
18.2001	0.3962
18.2184	0.413509
18.2368	0.434666
18.2551	0.380813
18.2734	0.421202
18.2918	0.386583
18.3101	0.415433
18.3285	0.428896
18.3468	0.457745
18.3651	0.446205
18.3835	0.457745
18.4018	0.457745
18.4201	0.332731
18.4385	0.392353
18.4568	0.380813
18.4751	0.3962
18.4935	0.451975
18.5118	0.386583
18.5302	0.363503
18.5485	0.398123
18.5668	0.392353
18.5852	0.3962
18.6035	0.386583
18.6218	0.365427
18.6402	0.35581
18.6585	0.35004
18.6769	0.3962
18.6952	0.37889
18.7135	0.415433
18.7319	0.388506
18.7502	0.38466
18.7685	0.419279
18.7869	0.421202
18.8052	0.428896
18.8235	0.405816
18.8419	0.426972
18.8602	0.407739
18.8786	0.401969
18.8969	0.457745
18.9152	0.423126
18.9336	0.426972
18.9519	0.515444
18.9702	0.448129
18.9886	0.444282
19.0069	0.428896
19.0253	0.432742
19.0436	0.446205
19.0619	0.446205
19.0803	0.409663
19.0986	0.484671
19.1169	0.459668
19.1353	0.444282
19.1536	0.498134
19.1719	0.501981
19.1903	0.476978
19.2086	0.586606
19.227	0.517367
19.2453	0.517367
19.2636	0.509674
19.282	0.588529
19.3003	0.628919
19.3186	0.640459
19.337	0.511597
19.3553	0.665461
19.3737	0.661615
19.392	0.671231
19.4103	0.750087
19.4287	0.682771
19.447	0.7347
19.4653	0.778936
19.4837	0.877024
19.502	0.948186
19.5204	1.06166
19.5387	1.2136
19.557	1.26745
19.5754	1.55018
19.5937	1.74828
19.612	2.09447
19.6304	2.51375
19.6487	2.99458
19.667	3.72735
19.6854	4.42936
19.7037	5.53718
19.7221	6.58345
19.7404	8.02785
19.7587	9.02027
19.7771	9.47994
19.7954	9.19145
19.8137	8.57791
19.8321	7.07197
19.8504	5.48909
19.8688	4.15817
19.8871	3.19652
19.9054	2.37143
19.9238	1.8329
19.9421	1.44632
19.9604	1.30784
19.9788	1.03281
19.9971	0.965496
20.0154	0.888564
20.0338	0.75201
20.0521	0.702004
20.0705	0.686618
20.0888	0.680848
20.1071	0.615456
20.1255	0.636612
20.1438	0.634689
20.1621	0.563527
20.1805	0.532754
20.1988	0.563527
20.2172	0.534677
20.2355	0.484671
20.2538	0.53083
20.2722	0.523137
20.2905	0.517367
20.3088	0.461592
20.3272	0.561603
20.3455	0.428896
20.3638	0.461592
20.3822	0.5366
20.4005	0.476978
20.4189	0.503904
20.4372	0.494288
20.4555	0.440435
20.4739	0.476978
20.4922	0.461592
20.5105	0.482748
20.5289	0.496211
20.5472	0.473132
20.5656	0.461592
20.5839	0.517367
20.6022	0.436589
20.6206	0.451975
20.6389	0.478901
20.6572	0.484671
20.6756	0.475055
20.6939	0.478901
20.7122	0.473132
20.7306	0.503904
20.7489	0.463515
20.7673	0.503904
20.7856	0.442359
20.8039	0.434666
20.8223	0.436589
20.8406	0.457745
20.8589	0.386583
20.8773	0.478901
20.8956	0.469285
20.914	0.417356
20.9323	0.453899
20.9506	0.444282
20.969	0.459668
20.9873	0.503904
21.0056	0.469285
21.024	0.494288
21.0423	0.478901
21.0607	0.55391
21.079	0.55391
21.0973	0.659691
21.1157	0.596223
21.134	0.605839
21.1523	0.58276
21.1707	0.619302
21.189	0.57699
21.2073	0.625072
21.2257	0.580836
21.244	0.540447
21.2624	0.540447
21.2807	0.551987
21.299	0.525061
21.3174	0.523137
21.3357	0.561603
21.354	0.517367
21.3724	0.509674
21.3907	0.526984
21.4091	0.513521
21.4274	0.486595
21.4457	0.492365
21.4641	0.450052
21.4824	0.473132
21.5007	0.557757
21.5191	0.509674
21.5374	0.455822
21.5557	0.465438
21.5741	0.534677
21.5924	0.534677
21.6108	0.540447
21.6291	0.596223
21.6474	0.586606
21.6658	0.675078
21.6841	0.702004
21.7024	0.677001
21.7208	0.742393
21.7391	0.75778
21.7575	0.802016
21.7758	0.844328
21.7941	0.850098
21.8125	1.01743
21.8308	1.20014
21.8491	1.34823
21.8675	1.43286
21.8858	1.57903
21.9041	1.82906
21.9225	1.99254
21.9408	2.32142
21.9592	2.54068
21.9775	3.10805
21.9958	3.12344
22.0142	3.61003
22.0325	3.46194
22.0508	3.51002
22.0692	3.48694
22.0875	3.19845
22.1059	2.58684
22.1242	2.38297
22.1425	2.13294
22.1609	1.80982
22.1792	1.63096
22.1975	1.4944
22.2159	1.36939
22.2342	1.20783
22.2525	1.17898
22.2709	1.05974
22.2892	1.05204
22.3076	1.13475
22.3259	1.12321
22.3442	1.10782
22.3626	1.30015
22.3809	1.45978
22.3992	1.54633
22.4176	1.71366
22.4359	1.80405
22.4543	1.89253
22.4726	1.81175
22.4909	1.89445
22.5093	1.67327
22.5276	1.40785
22.5459	1.20783
22.5643	1.12513
22.5826	0.940493
22.6009	0.76355
22.6193	0.761626
22.6376	0.673155
22.656	0.578913
22.6743	0.617379
22.6926	0.509674
22.711	0.494288
22.7293	0.486595
22.7476	0.473132
22.766	0.478901
22.7843	0.500058
22.8027	0.505828
22.821	0.465438
22.8393	0.515444
22.8577	0.419279
22.876	0.386583
22.8943	0.438512
22.9127	0.432742
22.931	0.401969
22.9494	0.450052
22.9677	0.450052
22.986	0.359657
23.0044	0.455822
23.0227	0.371197
23.041	0.351964
23.0594	0.357734
23.0777	0.37889
23.096	0.357734
23.1144	0.35004
23.1327	0.386583
23.1511	0.371197
23.1694	0.411586
23.1877	0.419279
23.2061	0.38466
23.2244	0.38466
23.2427	0.375043
23.2611	0.417356
23.2794	0.430819
23.2978	0.394276
23.3161	0.411586
23.3344	0.392353
23.3528	0.413509
23.3711	0.426972
23.3894	0.371197
23.4078	0.423126
23.4261	0.417356
23.4444	0.411586
23.4628	0.415433
23.4811	0.419279
23.4995	0.415433
23.5178	0.423126
23.5361	0.465438
23.5545	0.440435
23.5728	0.386583
23.5911	0.415433
23.6095	0.438512
23.6278	0.425049
23.6462	0.405816
23.6645	0.467362
23.6828	0.459668
23.7012	0.405816
23.7195	0.453899
23.7378	0.430819
23.7562	0.500058
23.7745	0.380813
23.7928	0.475055
23.8112	0.432742
23.8295	0.430819
23.8479	0.444282
23.8662	0.363503
23.8845	0.388506
23.9029	0.388506
23.9212	0.388506
23.9395	0.440435
23.9579	0.400046
23.9762	0.430819
23.9946	0.386583
24.0129	0.39043
24.0312	0.419279
24.0496	0.376967
24.0679	0.39043
24.0862	0.417356
24.1046	0.438512
24.1229	0.417356
24.1412	0.459668
24.1596	0.457745
24.1779	0.444282
24.1963	0.476978
24.2146	0.463515
24.2329	0.540447
24.2513	0.55968
24.2696	0.575066
24.2879	0.640459
24.3063	0.755856
24.3246	0.828942
24.343	0.792399
24.3613	0.865484
24.3796	1.05589
24.398	1.15975
24.4163	1.36554
24.4346	1.42901
24.453	1.40208
24.4713	1.57518
24.4897	1.54633
24.508	1.50787
24.5263	1.47325
24.5447	1.40401
24.563	1.17321
24.5813	1.05589
24.5997	1.01358
24.618	0.911644
24.6363	0.857791
24.6547	0.753933
24.673	0.713544
24.6914	0.623149
24.7097	0.686618
24.728	0.561603
24.7464	0.563527
24.7647	0.590453
24.783	0.555833
24.8014	0.605839
24.8197	0.625072
24.8381	0.58276
24.8564	0.644305
24.8747	0.57122
24.8931	0.544294
24.9114	0.555833
24.9297	0.501981
24.9481	0.569296
24.9664	0.471208
24.9847	0.478901
25.0031	0.405816
25.0214	0.403893
25.0398	0.401969
25.0581	0.430819
25.0764	0.359657
25.0948	0.37889
25.1131	0.357734
25.1314	0.315421
25.1498	0.325038
25.1681	0.371197
25.1865	0.305805
25.2048	0.319268
25.2231	0.330807
25.2415	0.307728
25.2598	0.321191
25.2781	0.276955
25.2965	0.309651
25.3148	0.328884
25.3331	0.286572
25.3515	0.342347
25.3698	0.315421
25.3882	0.325038
25.4065	0.282725
25.4248	0.307728
25.4432	0.303881
25.4615	0.330807
25.4798	0.276955
25.4982	0.319268
25.5165	0.282725
25.5349	0.351964
25.5532	0.298111
25.5715	0.313498
25.5899	0.286572
25.6082	0.305805
25.6265	0.325038
25.6449	0.328884
25.6632	0.319268
25.6815	0.323114
25.6999	0.298111
25.7182	0.37312
25.7366	0.323114
25.7549	0.37889
25.7732	0.305805
25.7916	0.34427
25.8099	0.38466
25.8282	0.39043
25.8466	0.319268
25.8649	0.446205
25.8833	0.432742
25.9016	0.38466
25.9199	0.380813
25.9383	0.457745
25.9566	0.400046
25.9749	0.469285
25.9933	0.401969
26.0116	0.380813
26.0299	0.415433
26.0483	0.394276
26.0666	0.371197
26.085	0.37889
26.1033	0.369273
26.1216	0.36158
26.14	0.351964
26.1583	0.351964
26.1766	0.313498
26.195	0.363503
26.2133	0.319268
26.2317	0.292341
26.25	0.319268
26.2683	0.290418
26.2867	0.288495
26.305	0.263492
26.3233	0.298111
26.3417	0.298111
26.36	0.238489
26.3784	0.290418
26.3967	0.242336
26.415	0.284648
26.4334	0.319268
26.4517	0.321191
26.47	0.276955
26.4884	0.284648
26.5067	0.282725
26.525	0.311574
26.5434	0.35004
26.5617	0.282725
26.5801	0.244259
26.5984	0.296188
26.6167	0.307728
26.6351	0.286572
26.6534	0.280802
26.6717	0.217333
26.6901	0.301958
26.7084	0.288495
26.7268	0.326961
26.7451	0.313498
26.7634	0.321191
26.7818	0.330807
26.8001	0.34427
26.8184	0.328884
26.8368	0.321191
26.8551	0.357734
26.8734	0.371197
26.8918	0.382736
26.9101	0.386583
26.9285	0.380813
26.9468	0.386583
26.9651	0.37889
26.9835	0.426972
27.0018	0.403893
27.0201	0.438512
27.0385	0.417356
27.0568	0.451975
27.0752	0.453899
27.0935	0.457745
27.1118	0.467362
27.1302	0.405816
27.1485	0.425049
27.1668	0.413509
27.1852	0.39043
27.2035	0.359657
27.2218	0.332731
27.2402	0.365427
27.2585	0.325038
27.2769	0.38466
27.2952	0.321191
27.3135	0.292341
27.3319	0.346194
27.3502	0.34427
27.3685	0.338501
27.3869	0.336577
27.4052	0.39043
27.4236	0.37312
27.4419	0.35581
27.4602	0.36735
27.4786	0.394276
27.4969	0.39043
27.5152	0.428896
27.5336	0.448129
27.5519	0.500058
27.5702	0.486595
27.5886	0.507751
27.6069	0.498134
27.6253	0.578913
27.6436	0.592376
27.6619	0.719314
27.6803	0.834712
27.6986	0.869331
27.7169	0.95011
27.7353	1.00973
27.7536	1.10397
27.772	1.03858
27.7903	1.0155
27.8086	1.03473
27.827	0.992422
27.8453	0.884717
27.8636	0.855868
27.882	0.705851
27.9003	0.673155
27.9187	0.611609
27.937	0.503904
27.9553	0.480825
27.9737	0.494288
27.992	0.405816
28.0103	0.442359
28.0287	0.413509
28.047	0.357734
28.0653	0.407739
28.0837	0.407739
28.102	0.409663
28.1204	0.407739
28.1387	0.380813
28.157	0.401969
28.1754	0.394276
28.1937	0.311574
28.212	0.348117
28.2304	0.351964
28.2487	0.348117
28.2671	0.309651
28.2854	0.325038
28.3037	0.317344
28.3221	0.275032
28.3404	0.334654
28.3587	0.332731
28.3771	0.357734
28.3954	0.35004
28.4137	0.359657
28.4321	0.35004
28.4504	0.359657
28.4688	0.334654
28.4871	0.321191
28.5054	0.342347
28.5238	0.425049
28.5421	0.434666
28.5604	0.380813
28.5788	0.432742
28.5971	0.455822
28.6155	0.475055
28.6338	0.515444
28.6521	0.575066
28.6705	0.678924
28.6888	0.727007
28.7071	0.975113
28.7255	0.940493
28.7438	1.05974
28.7621	1.14052
28.7805	1.18475
28.7988	1.18091
28.8172	1.1886
28.8355	1.08089
28.8538	0.93857
28.8722	0.905874
28.8905	0.848175
28.9088	0.742393
28.9272	0.707774
28.9455	0.598146
28.9639	0.494288
28.9822	0.509674
29.0005	0.451975
29.0189	0.463515
29.0372	0.398123
29.0555	0.298111
29.0739	0.38466
29.0922	0.290418
29.1105	0.332731
29.1289	0.328884
29.1472	0.300035
29.1656	0.290418
29.1839	0.273108
29.2022	0.321191
29.2206	0.284648
29.2389	0.271185
29.2572	0.267339
29.2756	0.290418
29.2939	0.248106
29.3123	0.315421
29.3306	0.221179
29.3489	0.265415
29.3673	0.298111
29.3856	0.255799
29.4039	0.282725
29.4223	0.251952
29.4406	0.250029
29.459	0.240412
29.4773	0.286572
29.4956	0.278878
29.514	0.288495
29.5323	0.234642
29.5506	0.244259
29.569	0.267339
29.5873	0.251952
29.6056	0.275032
29.624	0.246182
29.6423	0.282725
29.6607	0.259645
29.679	0.301958
29.6973	0.251952
29.7157	0.257722
29.734	0.261569
29.7523	0.288495
29.7707	0.265415
29.789	0.300035
29.8074	0.278878
29.8257	0.265415
29.844	0.250029
29.8624	0.257722
29.8807	0.261569
29.899	0.273108
29.9174	0.288495
29.9357	0.278878
29.954	0.265415
29.9724	0.269262
29.9907	0.273108
30.0091	0.217333
30.0274	0.265415
30.0457	0.250029
30.0641	0.263492
30.0824	0.246182
30.1007	0.273108
30.1191	0.278878
30.1374	0.238489
30.1558	0.263492
30.1741	0.226949
30.1924	0.284648
30.2108	0.280802
30.2291	0.217333
30.2474	0.269262
30.2658	0.225026
30.2841	0.225026
30.3024	0.207716
30.3208	0.18079
30.3391	0.219256
30.3575	0.246182
30.3758	0.226949
30.3941	0.244259
30.4125	0.190407
30.4308	0.226949
30.4491	0.194253
30.4675	0.244259
30.4858	0.20387
30.5042	0.234642
30.5225	0.182713
30.5408	0.18079
30.5592	0.184637
30.5775	0.207716
30.5958	0.18079
30.6142	0.188483
30.6325	0.226949
30.6508	0.182713
30.6692	0.19233
30.6875	0.217333
30.7059	0.196176
30.7242	0.20964
30.7425	0.217333
30.7609	0.153864
30.7792	0.188483
30.7975	0.213486
30.8159	0.207716
30.8342	0.207716
30.8526	0.221179
30.8709	0.213486
30.8892	0.257722
30.9076	0.280802
30.9259	0.238489
30.9442	0.238489
30.9626	0.250029
30.9809	0.1981
30.9992	0.263492
31.0176	0.250029
31.0359	0.215409
31.0543	0.246182
31.0726	0.248106
31.0909	0.244259
31.1093	0.248106
31.1276	0.211563
31.1459	0.230796
31.1643	0.250029
31.1826	0.242336
31.201	0.221179
31.2193	0.188483
31.2376	0.255799
31.256	0.267339
31.2743	0.205793
31.2926	0.171174
31.311	0.238489
31.3293	0.215409
31.3477	0.20964
31.366	0.261569
31.3843	0.275032
31.4027	0.217333
31.421	0.226949
31.4393	0.225026
31.4577	0.217333
31.476	0.300035
31.4943	0.273108
31.5127	0.282725
31.531	0.269262
31.5494	0.319268
31.5677	0.315421
31.586	0.365427
31.6044	0.365427
31.6227	0.394276
31.641	0.415433
31.6594	0.36158
31.6777	0.415433
31.6961	0.471208
31.7144	0.448129
31.7327	0.401969
31.7511	0.363503
31.7694	0.317344
31.7877	0.317344
31.8061	0.35581
31.8244	0.35004
31.8427	0.255799
31.8611	0.298111
31.8794	0.290418
31.8978	0.300035
31.9161	0.321191
31.9344	0.267339
31.9528	0.313498
31.9711	0.35581
31.9894	0.265415
32.0078	0.300035
32.0261	0.325038
32.0445	0.332731
32.0628	0.261569
32.0811	0.267339
32.0995	0.267339
32.1178	0.248106
32.1361	0.223103
32.1545	0.240412
32.1728	0.246182
32.1911	0.250029
32.2095	0.213486
32.2278	0.20387
32.2462	0.215409
32.2645	0.17502
32.2828	0.226949
32.3012	0.205793
32.3195	0.242336
32.3378	0.205793
32.3562	0.19233
32.3745	0.215409
32.3929	0.215409
32.4112	0.228873
32.4295	0.201946
32.4479	0.213486
32.4662	0.215409
32.4845	0.248106
32.5029	0.205793
32.5212	0.182713
32.5395	0.207716
32.5579	0.223103
32.5762	0.196176
32.5946	0.190407
32.6129	0.20964
32.6312	0.200023
32.6496	0.200023
32.6679	0.259645
32.6862	0.1981
32.7046	0.194253
32.7229	0.234642
32.7413	0.251952
32.7596	0.248106
32.7779	0.242336
32.7963	0.263492
32.8146	0.271185
32.8329	0.236566
32.8513	0.273108
32.8696	0.313498
32.888	0.298111
32.9063	0.255799
32.9246	0.282725
32.943	0.265415
32.9613	0.251952
32.9796	0.261569
32.998	0.278878
33.0163	0.207716
33.0346	0.221179
33.053	0.238489
33.0713	0.196176
33.0897	0.217333
33.108	0.190407
33.1263	0.196176
33.1447	0.190407
33.163	0.205793
33.1813	0.1981
33.1997	0.19233
33.218	0.217333
33.2364	0.134631
33.2547	0.19233
33.273	0.201946
33.2914	0.236566
33.3097	0.207716
33.328	0.226949
33.3464	0.17502
33.3647	0.178867
33.383	0.205793
33.4014	0.240412
33.4197	0.221179
33.4381	0.215409
33.4564	0.240412
33.4747	0.196176
33.4931	0.232719
33.5114	0.200023
33.5297	0.223103
33.5481	0.190407
33.5664	0.176943
33.5848	0.176943
33.6031	0.215409
33.6214	0.171174
33.6398	0.250029
33.6581	0.18079
33.6764	0.200023
33.6948	0.205793
33.7131	0.217333
33.7314	0.17502
33.7498	0.19233
33.7681	0.184637
33.7865	0.225026
33.8048	0.184637
33.8231	0.215409
33.8415	0.251952
33.8598	0.194253
33.8781	0.278878
33.8965	0.165404
33.9148	0.228873
33.9332	0.1981
33.9515	0.20964
33.9698	0.1981
33.9882	0.171174
34.0065	0.250029
34.0248	0.211563
34.0432	0.265415
34.0615	0.251952
34.0798	0.261569
34.0982	0.288495
34.1165	0.286572
34.1349	0.296188
34.1532	0.307728
34.1715	0.303881
34.1899	0.380813
34.2082	0.434666
34.2265	0.436589
34.2449	0.501981
34.2632	0.57699
34.2816	0.605839
34.2999	0.648152
34.3182	0.659691
34.3366	0.665461
34.3549	0.721237
34.3732	0.680848
34.3916	0.617379
34.4099	0.573143
34.4282	0.534677
34.4466	0.501981
34.4649	0.409663
34.4833	0.35004
34.5016	0.371197
34.5199	0.338501
34.5383	0.36158
34.5566	0.298111
34.5749	0.311574
34.5933	0.288495
34.6116	0.261569
34.63	0.267339
34.6483	0.234642
34.6666	0.261569
34.685	0.190407
34.7033	0.226949
34.7216	0.238489
34.74	0.238489
34.7583	0.201946
34.7767	0.225026
34.795	0.225026
34.8133	0.19233
34.8317	0.207716
34.85	0.20964
34.8683	0.196176
34.8867	0.201946
34.905	0.194253
34.9233	0.190407
34.9417	0.182713
34.96	0.219256
34.9784	0.18079
34.9967	0.228873
35.015	0.176943
35.0334	0.205793
35.0517	0.178867
35.07	0.215409
35.0884	0.184637
35.1067	0.184637
35.1251	0.20387
35.1434	0.221179
35.1617	0.155787
35.1801	0.19233
35.1984	0.165404
35.2167	0.19233
35.2351	0.182713
35.2534	0.215409
35.2717	0.18079
35.2901	0.205793
35.3084	0.201946
35.3268	0.196176
35.3451	0.144247
35.3634	0.178867
35.3818	0.178867
35.4001	0.17502
35.4184	0.19233
35.4368	0.190407
35.4551	0.19233
35.4735	0.1981
35.4918	0.188483
35.5101	0.194253
35.5285	0.176943
35.5468	0.20387
35.5651	0.18079
35.5835	0.178867
35.6018	0.20387
35.6201	0.213486
35.6385	0.201946
35.6568	0.215409
35.6752	0.188483
35.6935	0.213486
35.7118	0.205793
35.7302	0.213486
35.7485	0.230796
35.7668	0.267339
35.7852	0.280802
35.8035	0.244259
35.8219	0.255799
35.8402	0.253875
35.8585	0.255799
35.8769	0.315421
35.8952	0.326961
35.9135	0.388506
35.9319	0.3962
35.9502	0.386583
35.9685	0.473132
35.9869	0.461592
36.0052	0.434666
36.0236	0.500058
36.0419	0.507751
36.0602	0.482748
36.0786	0.434666
36.0969	0.463515
36.1152	0.463515
36.1336	0.3962
36.1519	0.432742
36.1703	0.36158
36.1886	0.35581
36.2069	0.319268
36.2253	0.330807
36.2436	0.269262
36.2619	0.251952
36.2803	0.275032
36.2986	0.257722
36.317	0.255799
36.3353	0.257722
36.3536	0.219256
36.372	0.244259
36.3903	0.244259
36.4086	0.230796
36.427	0.211563
36.4453	0.19233
36.4636	0.213486
36.482	0.16925
36.5003	0.213486
36.5187	0.1981
36.537	0.200023
36.5553	0.20387
36.5737	0.250029
36.592	0.200023
36.6103	0.188483
36.6287	0.18656
36.647	0.219256
36.6654	0.153864
36.6837	0.176943
36.702	0.1981
36.7204	0.19233
36.7387	0.178867
36.757	0.226949
36.7754	0.176943
36.7937	0.20964
36.812	0.159634
36.8304	0.167327
36.8487	0.194253
36.8671	0.20387
36.8854	0.213486
36.9037	0.200023
36.9221	0.182713
36.9404	0.196176
36.9587	0.221179
36.9771	0.240412
36.9954	0.18656
37.0138	0.234642
37.0321	0.232719
37.0504	0.223103
37.0688	0.238489
37.0871	0.246182
37.1054	0.176943
37.1238	0.226949
37.1421	0.269262
37.1604	0.246182
37.1788	0.234642
37.1971	0.213486
37.2155	0.217333
37.2338	0.221179
37.2521	0.221179
37.2705	0.211563
37.2888	0.223103
37.3071	0.201946
37.3255	0.201946
37.3438	0.196176
37.3622	0.17502
37.3805	0.16925
37.3988	0.194253
37.4172	0.151941
37.4355	0.188483
37.4538	0.18656
37.4722	0.142324
37.4905	0.184637
37.5088	0.167327
37.5272	0.178867
37.5455	0.188483
37.5639	0.200023
37.5822	0.161557
37.6005	0.153864
37.6189	0.215409
37.6372	0.178867
37.6555	0.16925
37.6739	0.146171
37.6922	0.178867
37.7106	0.136554
37.7289	0.167327
37.7472	0.16348
37.7656	0.17502
37.7839	0.16925
37.8022	0.136554
37.8206	0.18656
37.8389	0.159634
37.8573	0.194253
37.8756	0.178867
37.8939	0.207716
37.9123	0.200023
37.9306	0.1981
37.9489	0.178867
37.9673	0.18079
37.9856	0.18656
38.0039	0.182713
38.0223	0.182713
38.0406	0.17502
38.059	0.161557
38.0773	0.211563
38.0956	0.173097
38.114	0.167327
38.1323	0.173097
38.1506	0.140401
38.169	0.207716
38.1873	0.217333
38.2057	0.178867
38.224	0.219256
38.2423	0.200023
38.2607	0.16348
38.279	0.19233
38.2973	0.165404
38.3157	0.173097
38.334	0.190407
38.3523	0.19233
38.3707	0.18656
38.389	0.151941
38.4074	0.157711
38.4257	0.150017
38.444	0.1981
38.4624	0.167327
38.4807	0.159634
38.499	0.178867
38.5174	0.178867
38.5357	0.171174
38.5541	0.17502
38.5724	0.20964
38.5907	0.155787
38.6091	0.16348
38.6274	0.182713
38.6457	0.190407
38.6641	0.167327
38.6824	0.225026
38.7007	0.16925
38.7191	0.157711
38.7374	0.18079
38.7558	0.151941
38.7741	0.188483
38.7924	0.205793
38.8108	0.171174
38.8291	0.190407
38.8474	0.182713
38.8658	0.196176
38.8841	0.18079
38.9025	0.176943
38.9208	0.182713
38.9391	0.18079
38.9575	0.16348
38.9758	0.20964
38.9941	0.205793
39.0125	0.188483
39.0308	0.159634
39.0491	0.207716
39.0675	0.157711
39.0858	0.207716
39.1042	0.215409
39.1225	0.194253
39.1408	0.19233
39.1592	0.173097
39.1775	0.194253
39.1958	0.18079
39.2142	0.176943
39.2325	0.226949
39.2509	0.225026
39.2692	0.219256
39.2875	0.230796
39.3059	0.213486
39.3242	0.238489
39.3425	0.246182
39.3609	0.238489
39.3792	0.223103
39.3975	0.269262
39.4159	0.261569
39.4342	0.265415
39.4526	0.261569
39.4709	0.275032
39.4892	0.276955
39.5076	0.263492
39.5259	0.221179
39.5442	0.273108
39.5626	0.255799
39.5809	0.205793
39.5993	0.19233
39.6176	0.19233
39.6359	0.215409
39.6543	0.200023
39.6726	0.18079
39.6909	0.201946
39.7093	0.201946
39.7276	0.246182
39.746	0.18079
39.7643	0.217333
39.7826	0.232719
39.801	0.200023
39.8193	0.215409
39.8376	0.1981
39.856	0.18656
39.8743	0.18656
39.8926	0.1981
39.911	0.182713
39.9293	0.184637
39.9477	0.225026
39.966	0.225026
39.9843	0.1981
40.0027	0.213486
40.021	0.271185
40.0393	0.234642
40.0577	0.230796
40.076	0.246182
40.0944	0.259645
40.1127	0.251952
40.131	0.305805
40.1494	0.342347
40.1677	0.332731
40.186	0.359657
40.2044	0.332731
40.2227	0.394276
40.241	0.348117
40.2594	0.411586
40.2777	0.313498
40.2961	0.338501
40.3144	0.323114
40.3327	0.290418
40.3511	0.282725
40.3694	0.246182
40.3877	0.219256
40.4061	0.240412
40.4244	0.19233
40.4428	0.276955
40.4611	0.205793
40.4794	0.200023
40.4978	0.236566
40.5161	0.201946
40.5344	0.238489
[truncated: 1,056 more rows]

## Sheet: Heating 45 °C
2theta	Intensity
3.89731	1.51941
3.91565	1.37901
3.93399	1.39631
3.95232	1.49633
3.97066	1.44055
3.989	1.3867
4.00733	1.38862
4.02567	1.45594
4.04401	1.36939
4.06234	1.48286
4.08068	1.45594
4.09902	1.34246
4.11736	1.47902
4.13569	1.50787
4.15403	1.37901
4.17237	1.45978
4.1907	1.40016
4.20904	1.35785
4.22738	1.39631
4.24571	1.37324
4.26405	1.39631
4.28239	1.41555
4.30072	1.17898
4.31906	1.31746
4.3374	1.29438
4.35573	1.31554
4.37407	1.43478
4.39241	1.36939
4.41075	1.33862
4.42908	1.26553
4.44742	1.28861
4.46576	1.21168
4.48409	1.32131
4.50243	1.21745
4.52077	1.26361
4.5391	1.28669
4.55744	1.38478
4.57578	1.28861
4.59411	1.12898
4.61245	1.24245
4.63079	1.20399
4.64913	1.17514
4.66746	1.31361
4.6858	1.22129
4.70414	1.24822
4.72247	1.09051
4.74081	1.28669
4.75915	1.21168
4.77748	1.16552
4.79582	1.29438
4.81416	1.24437
4.83249	1.15975
4.85083	1.24053
4.86917	1.20399
4.8875	1.20975
4.90584	1.0405
4.92418	1.17898
4.94252	1.20206
4.96085	1.13667
4.97919	1.15398
4.99753	1.17898
5.01586	1.03473
5.0342	1.06935
5.05254	1.13282
5.07087	1.09436
5.08921	1.11167
5.10755	1.22899
5.12588	1.15206
5.14422	1.12321
5.16256	1.0732
5.1809	1.08282
5.19923	1.09436
5.21757	1.18283
5.23591	1.10782
5.25424	1.09628
5.27258	1.12513
5.29092	1.05589
5.30925	1.15013
5.32759	1.05204
5.34593	1.05589
5.36426	1.10205
5.3826	1.07897
5.40094	1.06551
5.41928	1.02512
5.43761	1.03473
5.45595	1.08089
5.47429	1.17129
5.49262	1.0482
5.51096	1.06743
5.5293	1.14052
5.54763	1.07512
5.56597	1.07705
5.58431	1.05397
5.60264	1.10205
5.62098	1.12513
5.63932	1.03281
5.65765	1.05012
5.67599	1.15975
5.69433	1.10782
5.71267	1.11167
5.731	1.05974
5.74934	1.09051
5.76768	1.10782
5.78601	1.07512
5.80435	1.11744
5.82269	1.10782
5.84102	1.12705
5.85936	1.02896
5.8777	1.09628
5.89603	1.12513
5.91437	1.05012
5.93271	1.12705
5.95105	1.14821
5.96938	1.16167
5.98772	1.10782
6.00606	1.08666
6.02439	1.14821
6.04273	1.20591
6.06107	1.16167
6.0794	1.22899
6.09774	1.304
6.11608	1.32323
6.13441	1.31361
6.15275	1.34823
6.17109	1.31554
6.18942	1.38285
6.20776	1.39439
6.2261	1.53479
6.24444	1.48286
6.26277	1.49825
6.28111	1.56557
6.29945	1.57134
6.31778	1.54633
6.33612	1.71943
6.35446	1.64827
6.37279	1.79636
6.39113	1.8329
6.40947	1.87522
6.4278	1.78097
6.44614	1.95599
6.46448	2.0637
6.48282	1.99254
6.50115	2.07524
6.51949	2.29257
6.53783	2.33104
6.55616	2.39643
6.5745	2.6003
6.59284	2.59645
6.61117	2.90995
6.62951	2.94072
6.64785	3.08882
6.66618	3.4504
6.68452	3.66388
6.70286	3.78505
6.72119	4.18317
6.73953	4.21779
6.75787	4.67554
6.77621	4.89672
6.79454	5.20252
6.81288	5.67758
6.83122	6.02185
6.84955	6.51998
6.86789	6.87579
6.88623	7.35277
6.90456	8.06632
6.9229	8.78178
6.94124	9.81267
6.95957	10.357
6.97791	11.234
6.99625	12.3707
7.01459	13.5862
7.03292	14.8633
7.05126	16.1653
7.0696	17.7405
7.08793	19.1637
7.10627	21.3255
7.12461	23.2431
7.14294	25.578
7.16128	28.0763
7.17962	30.9593
7.19795	33.977
7.21629	37.0543
7.23463	41.599
7.25297	46.7285
7.2713	53.3023
7.28964	60.5743
7.30798	68.0944
7.32631	80.5593
7.34465	92.9607
7.36299	106.782
7.38132	121.104
7.39966	135.36
7.418	143.784
7.43633	140.124
7.45467	122.168
7.47301	94.7686
7.49134	70.0408
7.50968	51.1405
7.52802	36.8793
7.54636	26.3761
7.56469	19.5734
7.58303	15.6557
7.60137	12.638
7.6197	9.60111
7.63804	6.9008
7.65638	5.10251
7.67471	3.83506
7.69305	3.15036
7.71139	2.75416
7.72972	2.42528
7.74806	2.23295
7.7664	2.14255
7.78474	1.89637
7.80307	1.89253
7.82141	1.66365
7.83975	1.58287
7.85808	1.54826
7.87642	1.37516
7.89476	1.4694
7.91309	1.25784
7.93143	1.23668
7.94977	1.21552
7.9681	1.22322
7.98644	1.15783
8.00478	1.10397
8.02311	1.15783
8.04145	1.01935
8.05979	1.02319
8.07813	0.992422
8.09646	1.00204
8.1148	0.911644
8.13314	0.934723
8.15147	0.930877
8.16981	0.803939
8.18815	0.821249
8.20648	0.882794
8.22482	0.875101
8.24316	0.842405
8.26149	0.815479
8.27983	0.75201
8.29817	0.782783
8.31651	0.72893
8.33484	0.775089
8.35318	0.742393
8.37152	0.7347
8.38985	0.777013
8.40819	0.665461
8.42653	0.698157
8.44486	0.663538
8.4632	0.74047
8.48154	0.74624
8.49987	0.750087
8.51821	0.721237
8.53655	0.661615
8.55488	0.671231
8.57322	0.692388
8.59156	0.650075
8.6099	0.686618
8.62823	0.657768
8.64657	0.669308
8.66491	0.730854
8.68324	0.659691
8.70158	0.640459
8.71992	0.601993
8.73825	0.632765
8.75659	0.636612
8.77493	0.557757
8.79326	0.550063
8.8116	0.555833
8.82994	0.646228
8.84828	0.634689
8.86661	0.55391
8.88495	0.586606
8.90329	0.621226
8.92162	0.521214
8.93996	0.538524
8.9583	0.563527
8.97663	0.573143
8.99497	0.551987
9.01331	0.567373
9.03164	0.546217
9.04998	0.54814
9.06832	0.573143
9.08665	0.644305
9.10499	0.55391
9.12333	0.515444
9.14167	0.540447
9.16	0.534677
9.17834	0.621226
9.19668	0.613532
9.21501	0.563527
9.23335	0.5366
9.25169	0.596223
9.27002	0.519291
9.28836	0.498134
9.3067	0.546217
9.32503	0.538524
9.34337	0.484671
9.36171	0.532754
9.38005	0.528907
9.39838	0.436589
9.41672	0.540447
9.43506	0.573143
9.45339	0.573143
9.47173	0.523137
9.49007	0.53083
9.5084	0.517367
9.52674	0.561603
9.54508	0.538524
9.56341	0.57122
9.58175	0.476978
9.60009	0.478901
9.61843	0.501981
9.63676	0.484671
9.6551	0.513521
9.67344	0.513521
9.69177	0.478901
9.71011	0.501981
9.72845	0.496211
9.74678	0.513521
9.76512	0.490441
9.78346	0.544294
9.80179	0.453899
9.82013	0.515444
9.83847	0.473132
9.8568	0.459668
9.87514	0.523137
9.89348	0.467362
9.91182	0.476978
9.93015	0.478901
9.94849	0.486595
9.96683	0.53083
9.98516	0.484671
10.0035	0.525061
10.0218	0.550063
10.0402	0.455822
10.0585	0.451975
10.0768	0.455822
10.0952	0.521214
10.1135	0.426972
10.1319	0.473132
10.1502	0.492365
10.1685	0.484671
10.1869	0.473132
10.2052	0.440435
10.2235	0.455822
10.2419	0.478901
10.2602	0.444282
10.2786	0.480825
10.2969	0.450052
10.3152	0.432742
10.3336	0.438512
10.3519	0.486595
10.3702	0.484671
10.3886	0.438512
10.4069	0.444282
10.4252	0.471208
10.4436	0.478901
10.4619	0.451975
10.4803	0.419279
10.4986	0.426972
10.5169	0.446205
10.5353	0.473132
10.5536	0.523137
10.5719	0.482748
10.5903	0.440435
10.6086	0.444282
10.627	0.400046
10.6453	0.492365
10.6636	0.392353
10.682	0.436589
10.7003	0.415433
10.7186	0.440435
10.737	0.409663
10.7553	0.471208
10.7736	0.442359
10.792	0.421202
10.8103	0.411586
10.8287	0.498134
10.847	0.405816
10.8653	0.457745
10.8837	0.401969
10.902	0.423126
10.9203	0.453899
10.9387	0.430819
10.957	0.434666
10.9754	0.459668
10.9937	0.438512
11.012	0.440435
11.0304	0.448129
11.0487	0.469285
11.067	0.476978
11.0854	0.475055
11.1037	0.36735
11.1221	0.459668
11.1404	0.409663
11.1587	0.476978
11.1771	0.436589
11.1954	0.423126
11.2137	0.37889
11.2321	0.38466
11.2504	0.401969
11.2687	0.436589
11.2871	0.440435
11.3054	0.403893
11.3238	0.346194
11.3421	0.388506
11.3604	0.353887
11.3788	0.413509
11.3971	0.419279
11.4154	0.407739
11.4338	0.459668
11.4521	0.434666
11.4705	0.375043
11.4888	0.430819
11.5071	0.392353
11.5255	0.400046
11.5438	0.430819
11.5621	0.407739
11.5805	0.436589
11.5988	0.394276
11.6171	0.451975
11.6355	0.476978
11.6538	0.407739
11.6722	0.417356
11.6905	0.38466
11.7088	0.35004
11.7272	0.394276
11.7455	0.419279
11.7638	0.459668
11.7822	0.36735
11.8005	0.38466
11.8189	0.442359
11.8372	0.394276
11.8555	0.394276
11.8739	0.371197
11.8922	0.417356
11.9105	0.409663
11.9289	0.3962
11.9472	0.3962
11.9655	0.376967
11.9839	0.419279
12.0022	0.413509
12.0206	0.430819
12.0389	0.409663
12.0572	0.417356
12.0756	0.448129
12.0939	0.34427
12.1122	0.432742
12.1306	0.38466
12.1489	0.438512
12.1673	0.411586
12.1856	0.39043
12.2039	0.38466
12.2223	0.415433
12.2406	0.442359
12.2589	0.451975
12.2773	0.432742
12.2956	0.465438
12.3139	0.469285
12.3323	0.459668
12.3506	0.401969
12.369	0.440435
12.3873	0.403893
12.4056	0.3962
12.424	0.434666
12.4423	0.436589
12.4606	0.467362
12.479	0.425049
12.4973	0.511597
12.5157	0.476978
12.534	0.53083
12.5523	0.544294
12.5707	0.507751
12.589	0.563527
12.6073	0.601993
12.6257	0.650075
12.644	0.671231
12.6624	0.692388
12.6807	0.790476
12.699	0.838558
12.7174	0.913567
12.7357	1.16937
12.754	1.05204
12.7724	1.30207
12.7907	1.61942
12.809	1.8079
12.8274	2.01369
12.8457	2.2618
12.8641	2.53683
12.8824	2.60992
12.9007	2.62915
12.9191	2.2618
12.9374	1.82906
12.9557	1.39247
12.9741	1.03858
12.9924	0.794322
13.0108	0.636612
13.0291	0.569296
13.0474	0.505828
13.0658	0.480825
13.0841	0.463515
13.1024	0.453899
13.1208	0.457745
13.1391	0.421202
13.1574	0.363503
13.1758	0.411586
13.1941	0.430819
13.2125	0.419279
13.2308	0.382736
13.2491	0.400046
13.2675	0.415433
13.2858	0.348117
13.3041	0.36735
13.3225	0.430819
13.3408	0.398123
13.3592	0.328884
13.3775	0.380813
13.3958	0.394276
13.4142	0.39043
13.4325	0.375043
13.4508	0.317344
13.4692	0.400046
13.4875	0.382736
13.5058	0.380813
13.5242	0.3962
13.5425	0.315421
13.5609	0.351964
13.5792	0.34427
13.5975	0.359657
13.6159	0.411586
13.6342	0.334654
13.6525	0.3962
13.6709	0.353887
13.6892	0.357734
13.7076	0.336577
13.7259	0.37889
13.7442	0.36158
13.7626	0.365427
13.7809	0.376967
13.7992	0.37889
13.8176	0.36735
13.8359	0.36735
13.8542	0.330807
13.8726	0.37312
13.8909	0.35581
13.9093	0.319268
13.9276	0.380813
13.9459	0.386583
13.9643	0.353887
13.9826	0.315421
14.0009	0.38466
14.0193	0.359657
14.0376	0.346194
14.056	0.340424
14.0743	0.394276
14.0926	0.376967
14.111	0.38466
14.1293	0.3962
14.1476	0.328884
14.166	0.380813
14.1843	0.325038
14.2026	0.359657
14.221	0.365427
14.2393	0.359657
14.2577	0.37312
14.276	0.340424
14.2943	0.392353
14.3127	0.365427
14.331	0.342347
14.3493	0.330807
14.3677	0.357734
14.386	0.36158
14.4044	0.348117
14.4227	0.35581
14.441	0.376967
14.4594	0.334654
14.4777	0.35004
14.496	0.348117
14.5144	0.348117
14.5327	0.400046
14.5511	0.36158
14.5694	0.35581
14.5877	0.35581
14.6061	0.411586
14.6244	0.382736
14.6427	0.380813
14.6611	0.394276
14.6794	0.451975
14.6977	0.365427
14.7161	0.405816
14.7344	0.375043
14.7528	0.35581
14.7711	0.440435
14.7894	0.451975
14.8078	0.476978
14.8261	0.442359
14.8444	0.453899
14.8628	0.475055
14.8811	0.503904
14.8995	0.453899
14.9178	0.484671
14.9361	0.465438
14.9545	0.444282
14.9728	0.434666
14.9911	0.340424
15.0095	0.376967
15.0278	0.353887
15.0461	0.36158
15.0645	0.359657
15.0828	0.38466
15.1012	0.342347
15.1195	0.348117
15.1378	0.311574
15.1562	0.36735
15.1745	0.325038
15.1928	0.348117
15.2112	0.317344
15.2295	0.35581
15.2479	0.332731
15.2662	0.35581
15.2845	0.328884
15.3029	0.37889
15.3212	0.330807
15.3395	0.371197
15.3579	0.336577
15.3762	0.359657
15.3945	0.323114
15.4129	0.336577
15.4312	0.313498
15.4496	0.394276
15.4679	0.342347
15.4862	0.375043
15.5046	0.303881
15.5229	0.317344
15.5412	0.369273
15.5596	0.351964
15.5779	0.36735
15.5963	0.35004
15.6146	0.36158
15.6329	0.328884
15.6513	0.340424
15.6696	0.369273
15.6879	0.334654
15.7063	0.321191
15.7246	0.380813
15.7429	0.359657
15.7613	0.37889
15.7796	0.35004
15.798	0.3962
15.8163	0.425049
15.8346	0.37312
15.853	0.434666
15.8713	0.413509
15.8896	0.465438
15.908	0.417356
15.9263	0.440435
15.9447	0.480825
15.963	0.580836
15.9813	0.551987
15.9997	0.569296
16.018	0.621226
16.0363	0.709697
16.0547	0.625072
16.073	0.727007
16.0914	0.753933
16.1097	0.730854
16.128	0.696234
16.1464	0.657768
16.1647	0.596223
16.183	0.596223
16.2014	0.569296
16.2197	0.569296
16.238	0.525061
16.2564	0.476978
16.2747	0.457745
16.2931	0.398123
16.3114	0.434666
16.3297	0.363503
16.3481	0.39043
16.3664	0.346194
16.3847	0.365427
16.4031	0.375043
16.4214	0.37889
16.4398	0.394276
16.4581	0.307728
16.4764	0.3962
16.4948	0.357734
16.5131	0.388506
16.5314	0.353887
16.5498	0.290418
16.5681	0.35004
16.5864	0.36158
16.6048	0.357734
16.6231	0.332731
16.6415	0.353887
16.6598	0.328884
16.6781	0.334654
16.6965	0.311574
16.7148	0.357734
16.7331	0.35004
16.7515	0.363503
16.7698	0.338501
16.7882	0.315421
16.8065	0.313498
16.8248	0.315421
16.8432	0.388506
16.8615	0.336577
16.8798	0.340424
16.8982	0.346194
16.9165	0.34427
16.9348	0.348117
16.9532	0.338501
16.9715	0.357734
16.9899	0.380813
17.0082	0.35581
17.0265	0.376967
17.0449	0.346194
17.0632	0.35004
17.0815	0.37889
17.0999	0.35004
17.1182	0.313498
17.1366	0.36158
17.1549	0.409663
17.1732	0.321191
17.1916	0.382736
17.2099	0.309651
17.2282	0.37312
17.2466	0.359657
17.2649	0.369273
17.2832	0.35004
17.3016	0.375043
17.3199	0.376967
17.3383	0.328884
17.3566	0.340424
17.3749	0.371197
17.3933	0.39043
17.4116	0.38466
17.4299	0.376967
17.4483	0.413509
17.4666	0.398123
17.485	0.380813
17.5033	0.423126
17.5216	0.380813
17.54	0.453899
17.5583	0.486595
17.5766	0.501981
17.595	0.486595
17.6133	0.505828
17.6317	0.586606
17.65	0.650075
17.6683	0.626995
17.6867	0.667385
17.705	0.76932
17.7233	0.765473
17.7417	0.707774
17.76	0.821249
17.7783	0.788553
17.7967	0.692388
17.815	0.678924
17.8334	0.702004
17.8517	0.592376
17.87	0.55968
17.8884	0.461592
17.9067	0.551987
17.925	0.471208
17.9434	0.446205
17.9617	0.461592
17.9801	0.455822
17.9984	0.426972
18.0167	0.428896
18.0351	0.405816
18.0534	0.403893
18.0717	0.425049
18.0901	0.455822
18.1084	0.415433
18.1267	0.38466
18.1451	0.423126
18.1634	0.451975
18.1818	0.386583
18.2001	0.39043
18.2184	0.457745
18.2368	0.442359
18.2551	0.475055
18.2734	0.432742
18.2918	0.471208
18.3101	0.451975
18.3285	0.407739
18.3468	0.426972
18.3651	0.457745
18.3835	0.490441
18.4018	0.359657
18.4201	0.382736
18.4385	0.415433
18.4568	0.353887
18.4751	0.365427
18.4935	0.446205
18.5118	0.409663
18.5302	0.405816
18.5485	0.36158
18.5668	0.315421
18.5852	0.351964
18.6035	0.36158
18.6218	0.36158
18.6402	0.35004
18.6585	0.415433
18.6769	0.380813
18.6952	0.338501
18.7135	0.346194
18.7319	0.409663
18.7502	0.386583
18.7685	0.442359
18.7869	0.380813
18.8052	0.371197
18.8235	0.411586
18.8419	0.436589
18.8602	0.471208
18.8786	0.409663
18.8969	0.419279
18.9152	0.459668
18.9336	0.419279
18.9519	0.436589
18.9702	0.451975
18.9886	0.428896
19.0069	0.432742
19.0253	0.450052
19.0436	0.455822
19.0619	0.469285
19.0803	0.440435
19.0986	0.486595
19.1169	0.55968
19.1353	0.53083
19.1536	0.484671
19.1719	0.471208
19.1903	0.482748
19.2086	0.492365
19.227	0.500058
19.2453	0.521214
19.2636	0.54814
19.282	0.540447
19.3003	0.519291
19.3186	0.609686
19.337	0.605839
19.3553	0.694311
19.3737	0.638535
19.392	0.713544
19.4103	0.7347
19.4287	0.742393
19.447	0.898181
19.4653	0.844328
19.4837	0.961649
19.502	1.07897
19.5204	1.26553
19.5387	1.48479
19.557	1.67904
19.5754	1.90407
19.5937	2.28873
19.612	2.84456
19.6304	3.20037
19.6487	4.04277
19.667	4.9448
19.6854	5.97569
19.7037	7.24891
19.7221	8.14902
19.7404	8.72024
19.7587	9.27992
19.7771	8.87025
19.7954	7.59895
19.8137	6.13532
19.8321	4.83517
19.8504	3.55618
19.8688	2.81956
19.8871	2.10217
19.9054	1.66558
19.9238	1.32708
19.9421	1.20399
19.9604	1.06358
19.9788	0.878948
19.9971	0.719314
20.0154	0.748163
20.0338	0.677001
20.0521	0.648152
20.0705	0.613532
20.0888	0.592376
20.1071	0.55968
20.1255	0.561603
20.1438	0.55968
20.1621	0.521214
20.1805	0.469285
20.1988	0.5366
20.2172	0.503904
20.2355	0.509674
20.2538	0.526984
20.2722	0.550063
20.2905	0.488518
20.3088	0.488518
20.3272	0.473132
20.3455	0.486595
20.3638	0.513521
20.3822	0.494288
20.4005	0.459668
20.4189	0.417356
20.4372	0.450052
20.4555	0.403893
20.4739	0.450052
20.4922	0.457745
20.5105	0.434666
20.5289	0.415433
20.5472	0.469285
20.5656	0.434666
20.5839	0.450052
20.6022	0.490441
20.6206	0.457745
20.6389	0.503904
20.6572	0.463515
20.6756	0.517367
20.6939	0.53083
20.7122	0.451975
20.7306	0.467362
20.7489	0.457745
20.7673	0.434666
20.7856	0.496211
20.8039	0.457745
20.8223	0.39043
20.8406	0.467362
20.8589	0.451975
20.8773	0.473132
20.8956	0.446205
20.914	0.480825
20.9323	0.457745
20.9506	0.534677
20.969	0.475055
20.9873	0.532754
21.0056	0.55391
21.024	0.586606
21.0423	0.503904
21.0607	0.486595
21.079	0.598146
21.0973	0.609686
21.1157	0.667385
21.134	0.615456
21.1523	0.619302
21.1707	0.611609
21.189	0.594299
21.2073	0.513521
21.2257	0.617379
21.244	0.496211
21.2624	0.601993
21.2807	0.465438
21.299	0.451975
21.3174	0.526984
21.3357	0.519291
21.354	0.453899
21.3724	0.469285
21.3907	0.538524
21.4091	0.490441
21.4274	0.513521
21.4457	0.488518
21.4641	0.488518
21.4824	0.55391
21.5007	0.528907
21.5191	0.540447
21.5374	0.550063
21.5557	0.532754
21.5741	0.613532
21.5924	0.540447
21.6108	0.638535
21.6291	0.671231
21.6474	0.642382
21.6658	0.705851
21.6841	0.628919
21.7024	0.786629
21.7208	0.780859
21.7391	0.809709
21.7575	0.898181
21.7758	1.0982
21.7941	1.10397
21.8125	1.23091
21.8308	1.30784
21.8491	1.57134
21.8675	1.70212
21.8858	1.9483
21.9041	2.19064
21.9225	2.44259
21.9408	2.84264
21.9592	2.92149
21.9775	3.32154
21.9958	3.41963
22.0142	3.5658
22.0325	3.33692
22.0508	3.12536
22.0692	2.83879
22.0875	2.53683
22.1059	2.35027
22.1242	1.98869
22.1425	1.68866
22.1609	1.66173
22.1792	1.38285
22.1975	1.34823
22.2159	1.20591
22.2342	1.17514
22.2525	1.08282
22.2709	1.01358
22.2892	1.05781
22.3076	1.07705
22.3259	1.24245
22.3442	1.28476
22.3626	1.43093
22.3809	1.58672
22.3992	1.59441
22.4176	1.81559
22.4359	1.73289
22.4543	1.82329
22.4726	1.63865
22.4909	1.47325
22.5093	1.17514
22.5276	1.05397
22.5459	0.934723
22.5643	0.802016
22.5826	0.773166
22.6009	0.630842
22.6193	0.715467
22.6376	0.561603
22.656	0.57122
22.6743	0.540447
22.6926	0.496211
22.711	0.511597
22.7293	0.461592
22.7476	0.486595
22.766	0.480825
22.7843	0.513521
22.8027	0.475055
22.821	0.450052
22.8393	0.448129
22.8577	0.376967
22.876	0.423126
22.8943	0.415433
22.9127	0.444282
22.931	0.39043
22.9494	0.39043
22.9677	0.375043
22.986	0.382736
23.0044	0.405816
23.0227	0.438512
23.041	0.363503
23.0594	0.426972
23.0777	0.36735
23.096	0.411586
23.1144	0.430819
23.1327	0.388506
23.1511	0.3962
23.1694	0.400046
23.1877	0.353887
23.2061	0.392353
23.2244	0.440435
23.2427	0.426972
23.2611	0.413509
23.2794	0.440435
23.2978	0.3962
23.3161	0.3962
23.3344	0.371197
23.3528	0.380813
23.3711	0.376967
23.3894	0.386583
23.4078	0.392353
23.4261	0.392353
23.4444	0.430819
23.4628	0.3962
23.4811	0.438512
23.4995	0.413509
23.5178	0.403893
23.5361	0.415433
23.5545	0.438512
23.5728	0.386583
23.5911	0.403893
23.6095	0.423126
23.6278	0.405816
23.6462	0.423126
23.6645	0.511597
23.6828	0.438512
23.7012	0.421202
23.7195	0.467362
23.7378	0.476978
23.7562	0.425049
23.7745	0.457745
23.7928	0.430819
23.8112	0.37312
23.8295	0.407739
23.8479	0.392353
23.8662	0.35581
23.8845	0.426972
23.9029	0.436589
23.9212	0.363503
23.9395	0.405816
23.9579	0.419279
23.9762	0.413509
23.9946	0.403893
24.0129	0.376967
24.0312	0.421202
24.0496	0.419279
24.0679	0.434666
24.0862	0.328884
24.1046	0.425049
24.1229	0.440435
24.1412	0.430819
24.1596	0.528907
24.1779	0.469285
24.1963	0.55968
24.2146	0.573143
24.2329	0.659691
24.2513	0.617379
24.2696	0.655845
24.2879	0.767396
24.3063	0.846251
24.3246	0.855868
24.343	1.0405
24.3613	1.11936
24.3796	1.21745
24.398	1.34823
24.4163	1.33477
24.4346	1.50402
24.453	1.62711
24.4713	1.5021
24.4897	1.48671
24.508	1.34631
24.5263	1.13667
24.5447	1.06743
24.563	1.02512
24.5813	0.90395
24.5997	0.802016
24.618	0.736623
24.6363	0.675078
24.6547	0.630842
24.673	0.648152
24.6914	0.561603
24.7097	0.58276
24.728	0.513521
24.7464	0.557757
24.7647	0.578913
24.783	0.626995
24.8014	0.655845
24.8197	0.605839
24.8381	0.607762
24.8564	0.57699
24.8747	0.600069
24.8931	0.5366
24.9114	0.505828
24.9297	0.486595
24.9481	0.484671
24.9664	0.423126
24.9847	0.425049
25.0031	0.405816
25.0214	0.403893
25.0398	0.403893
25.0581	0.340424
25.0764	0.35004
25.0948	0.401969
25.1131	0.35004
25.1314	0.319268
25.1498	0.342347
25.1681	0.334654
25.1865	0.325038
25.2048	0.298111
25.2231	0.336577
25.2415	0.351964
25.2598	0.307728
25.2781	0.326961
25.2965	0.305805
25.3148	0.282725
25.3331	0.351964
25.3515	0.340424
25.3698	0.321191
25.3882	0.288495
25.4065	0.305805
25.4248	0.315421
25.4432	0.363503
25.4615	0.351964
25.4798	0.301958
25.4982	0.311574
25.5165	0.300035
25.5349	0.321191
25.5532	0.292341
25.5715	0.290418
25.5899	0.290418
25.6082	0.288495
25.6265	0.292341
25.6449	0.323114
25.6632	0.307728
25.6815	0.332731
25.6999	0.290418
25.7182	0.36158
25.7366	0.311574
25.7549	0.305805
25.7732	0.38466
25.7916	0.37889
25.8099	0.365427
25.8282	0.426972
25.8466	0.436589
25.8649	0.430819
25.8833	0.444282
25.9016	0.3962
25.9199	0.453899
25.9383	0.428896
25.9566	0.476978
25.9749	0.438512
25.9933	0.455822
26.0116	0.436589
26.03	0.440435
26.0483	0.365427
26.0666	0.357734
26.085	0.357734
26.1033	0.365427
26.1216	0.275032
26.14	0.35004
26.1583	0.336577
26.1766	0.313498
26.195	0.296188
26.2133	0.35581
26.2317	0.36158
26.25	0.35581
26.2683	0.326961
26.2867	0.284648
26.305	0.326961
26.3233	0.273108
26.3417	0.311574
26.36	0.280802
26.3784	0.296188
26.3967	0.273108
26.415	0.288495
26.4334	0.263492
26.4517	0.265415
26.47	0.265415
26.4884	0.301958
26.5067	0.288495
26.525	0.286572
26.5434	0.271185
26.5617	0.278878
26.5801	0.278878
26.5984	0.296188
26.6167	0.259645
26.6351	0.348117
26.6534	0.336577
26.6717	0.336577
26.6901	0.290418
26.7084	0.305805
26.7268	0.301958
26.7451	0.323114
26.7634	0.34427
26.7818	0.290418
26.8001	0.342347
26.8184	0.319268
26.8368	0.326961
26.8551	0.334654
26.8734	0.401969
26.8918	0.371197
26.9101	0.417356
26.9285	0.407739
26.9468	0.38466
26.9651	0.453899
26.9835	0.475055
27.0018	0.469285
27.0201	0.484671
27.0385	0.471208
27.0568	0.471208
27.0752	0.436589
27.0935	0.444282
27.1118	0.398123
27.1302	0.430819
27.1485	0.382736
27.1668	0.35581
27.1852	0.380813
27.2035	0.376967
27.2218	0.35581
27.2402	0.348117
27.2585	0.296188
27.2769	0.371197
27.2952	0.338501
27.3135	0.319268
27.3319	0.39043
27.3502	0.313498
27.3685	0.340424
27.3869	0.353887
27.4052	0.37889
27.4236	0.34427
27.4419	0.376967
27.4602	0.342347
27.4786	0.423126
27.4969	0.39043
27.5152	0.417356
27.5336	0.457745
27.5519	0.513521
27.5702	0.578913
27.5886	0.626995
27.6069	0.596223
27.6253	0.661615
27.6436	0.778936
27.6619	0.884717
27.6803	0.919337
27.6986	0.919337
27.7169	1.11551
27.7353	1.09628
27.7536	1.0405
27.772	1.14629
27.7903	0.994345
27.8086	0.865484
27.827	0.865484
27.8453	0.730854
27.8636	0.678924
27.882	0.603916
27.9003	0.57122
27.9187	0.578913
27.937	0.500058
27.9553	0.425049
27.9737	0.417356
27.992	0.453899
28.0103	0.398123
28.0287	0.430819
28.047	0.401969
28.0653	0.417356
28.0837	0.38466
28.102	0.3962
28.1204	0.36735
28.1387	0.363503
28.157	0.353887
28.1754	0.380813
28.1937	0.36158
28.212	0.357734
28.2304	0.307728
28.2487	0.321191
28.2671	0.342347
28.2854	0.325038
28.3037	0.301958
28.3221	0.313498
28.3404	0.371197
28.3587	0.338501
28.3771	0.369273
28.3954	0.36735
28.4137	0.375043
28.4321	0.317344
28.4504	0.36735
28.4688	0.425049
28.4871	0.36158
28.5054	0.417356
28.5238	0.394276
28.5421	0.434666
28.5604	0.434666
28.5788	0.517367
28.5971	0.532754
28.6155	0.596223
28.6338	0.638535
28.6521	0.719314
28.6705	0.815479
28.6888	0.877024
28.7071	0.986652
28.7255	1.16937
28.7438	1.1309
28.7621	1.23091
28.7805	1.11744
28.7988	1.12898
28.8172	1.05012
28.8355	0.930877
28.8538	0.867408
28.8722	0.72893
28.8905	0.613532
28.9088	0.56545
28.9272	0.561603
28.9455	0.507751
28.9639	0.473132
28.9822	0.382736
29.0005	0.440435
29.0189	0.3962
29.0372	0.400046
29.0555	0.311574
29.0739	0.342347
29.0922	0.340424
29.1105	0.311574
29.1289	0.319268
29.1472	0.321191
29.1656	0.261569
29.1839	0.280802
29.2022	0.275032
29.2206	0.294265
29.2389	0.303881
29.2572	0.261569
29.2756	0.242336
29.2939	0.257722
29.3123	0.290418
29.3306	0.234642
29.3489	0.265415
29.3673	0.244259
29.3856	0.269262
29.4039	0.257722
29.4223	0.248106
29.4406	0.232719
29.459	0.246182
29.4773	0.242336
29.4956	0.263492
29.514	0.253875
29.5323	0.253875
29.5506	0.261569
29.569	0.250029
29.5873	0.321191
29.6056	0.269262
29.624	0.238489
29.6423	0.261569
29.6607	0.269262
29.679	0.269262
29.6973	0.267339
29.7157	0.317344
29.734	0.292341
29.7523	0.278878
29.7707	0.255799
29.789	0.276955
29.8074	0.330807
29.8257	0.286572
29.844	0.259645
29.8624	0.284648
29.8807	0.290418
29.899	0.269262
29.9174	0.311574
29.9357	0.259645
29.954	0.321191
29.9724	0.263492
29.9907	0.286572
30.0091	0.205793
30.0274	0.301958
30.0457	0.265415
30.0641	0.257722
30.0824	0.267339
30.1007	0.267339
30.1191	0.236566
30.1374	0.269262
30.1558	0.265415
30.1741	0.246182
30.1924	0.236566
30.2108	0.234642
30.2291	0.257722
30.2474	0.275032
30.2658	0.278878
30.2841	0.194253
30.3024	0.236566
30.3208	0.200023
30.3391	0.215409
30.3575	0.19233
30.3758	0.261569
30.3941	0.261569
30.4125	0.213486
30.4308	0.236566
30.4491	0.228873
30.4675	0.230796
30.4858	0.223103
30.5042	0.211563
30.5225	0.200023
30.5408	0.19233
30.5592	0.213486
30.5775	0.200023
30.5958	0.200023
30.6142	0.20387
30.6325	0.228873
30.6508	0.250029
30.6692	0.18079
30.6875	0.217333
30.7059	0.246182
30.7242	0.190407
30.7425	0.16348
30.7609	0.215409
30.7792	0.232719
30.7975	0.190407
30.8159	0.225026
30.8342	0.211563
30.8526	0.16925
30.8709	0.213486
30.8892	0.253875
30.9076	0.217333
30.9259	0.244259
30.9442	0.196176
30.9626	0.286572
30.9809	0.269262
30.9992	0.240412
31.0176	0.250029
31.0359	0.251952
31.0543	0.253875
31.0726	0.225026
31.0909	0.259645
31.1093	0.234642
31.1276	0.225026
31.1459	0.238489
31.1643	0.219256
31.1826	0.228873
31.201	0.244259
31.2193	0.215409
31.2376	0.276955
31.256	0.253875
31.2743	0.248106
31.2926	0.1981
31.311	0.234642
31.3293	0.225026
31.3477	0.246182
31.366	0.242336
31.3843	0.240412
31.4027	0.267339
31.421	0.259645
31.4393	0.250029
31.4577	0.255799
31.476	0.309651
31.4943	0.325038
31.5127	0.309651
31.531	0.340424
31.5494	0.36735
31.5677	0.34427
31.586	0.330807
31.6044	0.428896
31.6227	0.417356
31.641	0.465438
31.6594	0.388506
31.6777	0.376967
31.6961	0.409663
31.7144	0.388506
31.7327	0.342347
31.7511	0.311574
31.7694	0.334654
31.7877	0.276955
31.8061	0.326961
31.8244	0.325038
31.8427	0.313498
31.8611	0.334654
31.8794	0.334654
31.8978	0.292341
31.9161	0.351964
31.9344	0.317344
31.9528	0.35004
31.9711	0.305805
31.9894	0.300035
32.0078	0.278878
32.0261	0.257722
32.0445	0.280802
32.0628	0.232719
32.0811	0.275032
32.0995	0.217333
32.1178	0.219256
32.1361	0.246182
32.1545	0.248106
32.1728	0.18079
32.1911	0.211563
32.2095	0.223103
32.2278	0.20387
32.2462	0.225026
32.2645	0.18656
32.2828	0.19233
32.3012	0.223103
32.3195	0.201946
32.3378	0.228873
32.3562	0.217333
32.3745	0.190407
32.3929	0.211563
32.4112	0.215409
32.4295	0.190407
32.4479	0.240412
32.4662	0.176943
32.4845	0.184637
32.5029	0.217333
32.5212	0.226949
32.5395	0.232719
32.5579	0.194253
32.5762	0.20964
32.5946	0.171174
32.6129	0.234642
32.6312	0.201946
32.6496	0.200023
32.6679	0.250029
32.6862	0.240412
32.7046	0.311574
32.7229	0.244259
32.7413	0.240412
32.7596	0.240412
32.7779	0.313498
32.7963	0.301958
32.8146	0.265415
32.8329	0.300035
32.8513	0.296188
32.8696	0.248106
32.888	0.303881
32.9063	0.288495
32.9246	0.296188
32.943	0.226949
32.9613	0.228873
32.9796	0.248106
32.998	0.228873
33.0163	0.228873
33.0346	0.213486
33.053	0.205793
33.0713	0.19233
33.0897	0.200023
33.108	0.211563
33.1263	0.190407
33.1447	0.18656
33.163	0.176943
33.1813	0.228873
33.1997	0.225026
33.218	0.200023
33.2364	0.194253
33.2547	0.223103
33.273	0.211563
33.2914	0.19233
33.3097	0.190407
33.328	0.184637
33.3464	0.205793
33.3647	0.1981
33.383	0.201946
33.4014	0.201946
33.4197	0.196176
33.4381	0.1981
33.4564	0.213486
33.4747	0.238489
33.4931	0.20964
33.5114	0.167327
33.5297	0.1981
33.5481	0.215409
33.5664	0.18079
33.5848	0.215409
33.6031	0.226949
33.6214	0.194253
33.6398	0.200023
33.6581	0.18656
33.6764	0.213486
33.6948	0.16348
33.7131	0.213486
33.7314	0.196176
33.7498	0.16348
33.7681	0.201946
33.7865	0.200023
33.8048	0.205793
33.8231	0.182713
33.8415	0.223103
33.8598	0.234642
33.8781	0.20964
33.8965	0.200023
33.9148	0.194253
33.9332	0.213486
33.9515	0.232719
33.9698	0.240412
33.9882	0.236566
34.0065	0.253875
34.0248	0.292341
34.0432	0.246182
34.0615	0.294265
34.0798	0.305805
34.0982	0.273108
34.1165	0.284648
34.1349	0.328884
34.1532	0.394276
34.1715	0.369273
34.1899	0.478901
34.2082	0.505828
34.2265	0.528907
34.2449	0.611609
34.2632	0.632765
34.2816	0.694311
34.2999	0.686618
34.3182	0.661615
34.3366	0.613532
34.3549	0.625072
34.3732	0.613532
34.3916	0.563527
34.4099	0.469285
34.4283	0.455822
34.4466	0.37889
34.4649	0.415433
34.4833	0.305805
34.5016	0.326961
34.5199	0.301958
34.5383	0.300035
34.5566	0.259645
34.5749	0.240412
34.5933	0.290418
34.6116	0.240412
34.63	0.238489
34.6483	0.1981
34.6666	0.226949
34.685	0.201946
34.7033	0.215409
34.7216	0.20387
34.74	0.226949
34.7583	0.176943
34.7767	0.1981
34.795	0.19233
34.8133	0.221179
34.8317	0.201946
34.85	0.228873
34.8683	0.196176
34.8867	0.188483
34.905	0.201946
34.9233	0.217333
34.9417	0.18656
34.96	0.205793
34.9784	0.201946
34.9967	0.173097
35.015	0.207716
35.0334	0.205793
35.0517	0.196176
35.07	0.18656
35.0884	0.178867
35.1067	0.1981
35.1251	0.201946
35.1434	0.200023
35.1617	0.182713
35.1801	0.18079
35.1984	0.184637
35.2167	0.173097
35.2351	0.16925
35.2534	0.217333
35.2717	0.196176
35.2901	0.205793
35.3084	0.190407
35.3268	0.1981
35.3451	0.215409
35.3634	0.211563
35.3818	0.176943
35.4001	0.173097
35.4184	0.230796
35.4368	0.211563
35.4551	0.188483
35.4735	0.196176
35.4918	0.207716
35.5101	0.20964
35.5285	0.167327
35.5468	0.238489
35.5651	0.219256
35.5835	0.19233
35.6018	0.211563
35.6201	0.200023
35.6385	0.184637
35.6568	0.184637
35.6752	0.217333
35.6935	0.244259
35.7118	0.219256
35.7302	0.236566
35.7485	0.265415
35.7668	0.240412
35.7852	0.271185
35.8035	0.255799
35.8219	0.309651
35.8402	0.394276
35.8585	0.315421
35.8769	0.365427
35.8952	0.419279
35.9135	0.438512
35.9319	0.430819
35.9502	0.500058
35.9685	0.463515
35.9869	0.475055
36.0052	0.475055
36.0236	0.500058
36.0419	0.438512
36.0602	0.421202
36.0786	0.423126
36.0969	0.3962
36.1152	0.319268
36.1336	0.359657
36.1519	0.321191
36.1703	0.290418
36.1886	0.294265
36.2069	0.261569
36.2253	0.255799
36.2436	0.223103
36.2619	0.292341
36.2803	0.276955
36.2986	0.267339
36.317	0.242336
36.3353	0.226949
36.3536	0.19233
36.372	0.213486
36.3903	0.251952
36.4086	0.219256
36.427	0.20964
36.4453	0.194253
36.4636	0.230796
36.482	0.230796
36.5003	0.178867
36.5187	0.213486
36.537	0.182713
36.5553	0.196176
36.5737	0.16348
36.592	0.171174
36.6103	0.201946
36.6287	0.20964
36.647	0.173097
36.6654	0.176943
36.6837	0.205793
36.702	0.18656
36.7204	0.213486
36.7387	0.19233
36.757	0.18079
36.7754	0.159634
36.7937	0.201946
36.812	0.19233
36.8304	0.215409
36.8487	0.188483
36.8671	0.18079
36.8854	0.194253
36.9037	0.20387
36.9221	0.190407
36.9404	0.19233
36.9587	0.207716
36.9771	0.221179
36.9954	0.223103
37.0138	0.232719
37.0321	0.232719
37.0504	0.219256
37.0688	0.20964
37.0871	0.228873
37.1054	0.228873
37.1238	0.184637
37.1421	0.221179
37.1604	0.232719
37.1788	0.18656
37.1971	0.200023
37.2155	0.217333
37.2338	0.217333
37.2521	0.159634
37.2705	0.161557
37.2888	0.194253
37.3071	0.225026
37.3255	0.196176
37.3438	0.16925
37.3622	0.19233
37.3805	0.153864
37.3988	0.17502
37.4172	0.167327
37.4355	0.178867
37.4538	0.182713
37.4722	0.182713
37.4905	0.155787
37.5088	0.153864
37.5272	0.159634
37.5455	0.155787
37.5639	0.176943
37.5822	0.1981
37.6005	0.176943
37.6189	0.17502
37.6372	0.173097
37.6555	0.182713
37.6739	0.188483
37.6922	0.157711
37.7106	0.182713
37.7289	0.188483
37.7472	0.151941
37.7656	0.188483
37.7839	0.20387
37.8022	0.18656
37.8206	0.20387
37.8389	0.190407
37.8573	0.182713
37.8756	0.176943
37.8939	0.20964
37.9123	0.194253
37.9306	0.18656
37.9489	0.18656
37.9673	0.151941
37.9856	0.159634
38.0039	0.150017
38.0223	0.19233
38.0406	0.16348
38.059	0.171174
38.0773	0.182713
38.0956	0.148094
38.114	0.167327
38.1323	0.18079
38.1506	0.205793
38.169	0.176943
38.1873	0.184637
38.2057	0.150017
38.224	0.165404
38.2423	0.148094
38.2607	0.211563
38.279	0.17502
38.2973	0.178867
38.3157	0.176943
38.334	0.17502
38.3523	0.18656
38.3707	0.215409
38.389	0.144247
38.4074	0.18079
38.4257	0.182713
38.444	0.196176
38.4624	0.167327
38.4807	0.16925
38.499	0.178867
38.5174	0.167327
38.5357	0.213486
38.5541	0.182713
38.5724	0.153864
38.5907	0.18079
38.6091	0.173097
38.6274	0.1981
38.6457	0.178867
38.6641	0.194253
38.6824	0.207716
38.7007	0.159634
38.7191	0.20964
38.7374	0.173097
38.7558	0.161557
38.7741	0.16925
38.7924	0.159634
38.8108	0.132708
38.8291	0.16348
38.8474	0.150017
38.8658	0.18079
38.8841	0.176943
38.9025	0.205793
38.9208	0.148094
38.9391	0.16348
38.9575	0.167327
38.9758	0.18079
38.9941	0.146171
39.0125	0.213486
39.0308	0.20387
39.0491	0.16925
39.0675	0.188483
39.0858	0.196176
39.1042	0.18079
39.1225	0.173097
39.1408	0.213486
39.1592	0.213486
39.1775	0.20387
39.1958	0.221179
39.2142	0.200023
39.2325	0.194253
39.2509	0.225026
39.2692	0.213486
39.2875	0.228873
39.3059	0.194253
39.3242	0.221179
39.3425	0.201946
39.3609	0.200023
39.3792	0.261569
39.3975	0.275032
39.4159	0.275032
39.4342	0.282725
39.4526	0.234642
39.4709	0.267339
39.4892	0.253875
39.5076	0.207716
39.5259	0.234642
39.5442	0.234642
39.5626	0.261569
39.5809	0.20964
39.5993	0.19233
39.6176	0.205793
39.6359	0.182713
39.6543	0.178867
39.6726	0.182713
39.6909	0.182713
39.7093	0.200023
39.7276	0.16925
39.746	0.171174
39.7643	0.217333
39.7826	0.207716
39.801	0.190407
39.8193	0.184637
39.8376	0.215409
39.856	0.20964
39.8743	0.200023
39.8926	0.240412
39.911	0.228873
39.9293	0.221179
39.9477	0.167327
39.966	0.242336
39.9843	0.223103
40.0027	0.232719
40.021	0.244259
40.0393	0.269262
40.0577	0.259645
40.076	0.305805
40.0944	0.34427
40.1127	0.35004
40.131	0.353887
40.1494	0.305805
40.1677	0.313498
40.186	0.363503
40.2044	0.290418
40.2227	0.288495
40.241	0.257722
40.2594	0.296188
40.2777	0.275032
40.2961	0.259645
40.3144	0.221179
40.3327	0.234642
40.3511	0.240412
40.3694	0.18079
40.3877	0.215409
40.4061	0.20387
40.4244	0.207716
40.4428	0.215409
40.4611	0.217333
40.4794	0.223103
40.4978	0.223103
40.5161	0.213486
40.5344	0.217333
[truncated: 1,056 more rows]

## Sheet: Heating 55 °C
2theta	Intensity
3.89731	1.46171
3.91565	1.51364
3.93399	1.39631
3.95232	1.40785
3.97066	1.37901
3.989	1.44055
4.00733	1.39247
4.02567	1.43286
4.04401	1.40593
4.06234	1.52133
4.08068	1.52902
4.09902	1.40978
4.11735	1.36939
4.13569	1.43093
4.15403	1.36939
4.17237	1.41362
4.1907	1.39055
4.20904	1.45786
4.22738	1.34246
4.24571	1.31169
4.26405	1.37324
4.28239	1.40016
4.30072	1.39247
4.31906	1.35785
4.3374	1.25976
4.35573	1.24822
4.37407	1.30207
4.39241	1.35977
4.41075	1.29053
4.42908	1.23283
4.44742	1.31554
4.46576	1.23668
4.48409	1.33669
4.50243	1.23091
4.52077	1.21552
4.5391	1.2713
4.55744	1.16552
4.57578	1.304
4.59411	1.20783
4.61245	1.25014
4.63079	1.26553
4.64913	1.19052
4.66746	1.16744
4.6858	1.19629
4.70414	1.25207
4.72247	1.20975
4.74081	1.19245
4.75915	1.27322
4.77748	1.21745
4.79582	1.14244
4.81416	1.16552
4.83249	1.12128
4.85083	1.23091
4.86917	1.25591
4.8875	1.25976
4.90584	1.19822
4.92418	1.25207
4.94252	1.21937
4.96085	1.26361
4.97919	1.20591
4.99753	1.2136
5.01586	1.21745
5.0342	1.10013
5.05254	1.1309
5.07087	1.09051
5.08921	1.25014
5.10755	1.05012
5.12588	1.12513
5.14422	1.15013
5.16256	1.22899
5.1809	1.0982
5.19923	1.12513
5.21757	1.05012
5.23591	1.14821
5.25424	1.10974
5.27258	1.0982
5.29092	1.19245
5.30925	1.18475
5.32759	1.10974
5.34593	1.04435
5.36426	1.03473
5.3826	1.13859
5.40094	1.09628
5.41927	1.18668
5.43761	1.13475
5.45595	1.04243
5.47429	1.11359
5.49262	1.14052
5.51096	1.12321
5.5293	1.01935
5.54763	1.04627
5.56597	1.00589
5.58431	1.09243
5.60264	1.04627
5.62098	1.10013
5.63932	1.06358
5.65765	1.01935
5.67599	1.16167
5.69433	1.1559
5.71267	1.11744
5.731	1.07897
5.74934	1.08666
5.76768	1.17321
5.78601	1.07705
5.80435	1.10205
5.82269	1.14436
5.84102	1.11551
5.85936	1.25976
5.8777	1.19437
5.89603	1.17321
5.91437	1.10782
5.93271	1.16744
5.95104	1.16744
5.96938	1.16552
5.98772	1.16167
6.00606	1.19437
6.02439	1.14629
6.04273	1.16552
6.06107	1.19245
6.0794	1.20975
6.09774	1.27707
6.11608	1.26361
6.13441	1.28669
6.15275	1.29823
6.17109	1.32708
6.18942	1.39439
6.20776	1.39824
6.2261	1.45594
6.24444	1.51364
6.26277	1.39247
6.28111	1.59057
6.29945	1.50402
6.31778	1.62326
6.33612	1.62326
6.35446	1.6925
6.37279	1.63096
6.39113	1.81175
6.40947	1.93292
6.4278	1.99638
6.44614	1.96369
6.46448	2.07139
6.48282	2.14255
6.50115	2.26372
6.51949	2.27142
6.53783	2.37335
6.55616	2.58491
6.5745	2.69454
6.59284	2.6907
6.61117	2.99458
6.62951	3.14075
6.64785	3.41963
6.66618	3.55233
6.68452	3.60811
6.70286	4.0447
6.72119	4.21202
6.73953	4.44667
6.75787	4.85248
6.77621	5.06405
6.79454	5.50063
6.81288	6.03339
6.83122	5.83337
6.84955	6.43728
6.86789	7.10467
6.88623	7.58164
6.90456	8.26057
6.9229	8.66831
6.94124	9.62996
6.95957	10.7089
6.97791	11.6879
6.99625	12.9823
7.01459	14.1189
7.03292	15.321
7.05126	16.8173
7.0696	18.1771
7.08793	20.3023
7.10627	21.8852
7.12461	23.9181
7.14294	26.43
7.16128	28.7552
7.17962	31.3517
7.19795	35.3598
7.21629	39.0718
7.23463	44.4263
7.25296	49.3518
7.2713	56.5258
7.28964	64.1382
7.30798	72.7834
7.32631	84.5117
7.34465	97.8459
7.36299	112.476
7.38132	127.428
7.39966	139.52
7.418	143.97
7.43633	133.342
7.45467	109.753
7.47301	83.9078
7.49134	62.211
7.50968	44.8629
7.52802	31.7537
7.54636	23.2796
7.56469	17.9251
7.58303	14.2632
7.60137	11.1378
7.6197	8.08939
7.63804	5.92953
7.65638	4.54668
7.67471	3.53118
7.69305	3.08497
7.71139	2.50606
7.72972	2.46952
7.74806	2.0964
7.7664	1.98484
7.78473	1.85021
7.80307	1.72712
7.82141	1.60018
7.83975	1.51941
7.85808	1.5271
7.87642	1.47132
7.89476	1.39247
7.91309	1.29053
7.93143	1.25014
7.94977	1.14244
7.9681	1.15013
7.98644	1.15783
8.00478	1.1559
8.02311	1.04627
8.04145	1.01358
8.05979	0.967419
8.07813	0.992422
8.09646	0.973189
8.1148	0.859715
8.13314	0.94434
8.15147	0.790476
8.16981	0.940493
8.18815	0.873178
8.20648	0.913567
8.22482	0.828942
8.24316	0.784706
8.26149	0.759703
8.27983	0.748163
8.29817	0.771243
8.3165	0.75201
8.33484	0.790476
8.35318	0.767396
8.37152	0.72316
8.38985	0.696234
8.40819	0.730854
8.42653	0.750087
8.44486	0.707774
8.4632	0.702004
8.48154	0.705851
8.49987	0.703927
8.51821	0.715467
8.53655	0.75201
8.55488	0.657768
8.57322	0.678924
8.59156	0.640459
8.6099	0.628919
8.62823	0.634689
8.64657	0.619302
8.66491	0.661615
8.68324	0.613532
8.70158	0.567373
8.71992	0.661615
8.73825	0.575066
8.75659	0.644305
8.77493	0.636612
8.79326	0.638535
8.8116	0.54814
8.82994	0.632765
8.84828	0.580836
8.86661	0.653922
8.88495	0.638535
8.90329	0.588529
8.92162	0.644305
8.93996	0.532754
8.9583	0.586606
8.97663	0.598146
8.99497	0.546217
9.01331	0.544294
9.03164	0.540447
9.04998	0.5366
9.06832	0.588529
9.08665	0.54814
9.10499	0.534677
9.12333	0.55968
9.14167	0.586606
9.16	0.538524
9.17834	0.573143
9.19668	0.550063
9.21501	0.567373
9.23335	0.588529
9.25169	0.465438
9.27002	0.56545
9.28836	0.54237
9.3067	0.500058
9.32503	0.528907
9.34337	0.521214
9.36171	0.532754
9.38005	0.486595
9.39838	0.523137
9.41672	0.567373
9.43506	0.5366
9.45339	0.563527
9.47173	0.534677
9.49007	0.501981
9.5084	0.557757
9.52674	0.492365
9.54508	0.492365
9.56341	0.509674
9.58175	0.525061
9.60009	0.488518
9.61842	0.434666
9.63676	0.534677
9.6551	0.442359
9.67344	0.467362
9.69177	0.546217
9.71011	0.453899
9.72845	0.505828
9.74678	0.463515
9.76512	0.525061
9.78346	0.53083
9.80179	0.544294
9.82013	0.469285
9.83847	0.482748
9.8568	0.461592
9.87514	0.478901
9.89348	0.525061
9.91182	0.486595
9.93015	0.461592
9.94849	0.484671
9.96683	0.463515
9.98516	0.505828
10.0035	0.496211
10.0218	0.411586
10.0402	0.432742
10.0585	0.480825
10.0768	0.467362
10.0952	0.457745
10.1135	0.453899
10.1319	0.463515
10.1502	0.442359
10.1685	0.53083
10.1869	0.465438
10.2052	0.490441
10.2235	0.521214
10.2419	0.469285
10.2602	0.446205
10.2786	0.39043
10.2969	0.484671
10.3152	0.469285
10.3336	0.494288
10.3519	0.388506
10.3702	0.471208
10.3886	0.475055
10.4069	0.455822
10.4252	0.448129
10.4436	0.446205
10.4619	0.430819
10.4803	0.448129
10.4986	0.442359
10.5169	0.425049
10.5353	0.498134
10.5536	0.469285
10.5719	0.432742
10.5903	0.425049
10.6086	0.473132
10.627	0.459668
10.6453	0.446205
10.6636	0.451975
10.682	0.436589
10.7003	0.480825
10.7186	0.426972
10.737	0.459668
10.7553	0.450052
10.7736	0.398123
10.792	0.423126
10.8103	0.473132
10.8287	0.403893
10.847	0.423126
10.8653	0.380813
10.8837	0.405816
10.902	0.494288
10.9203	0.425049
10.9387	0.407739
10.957	0.371197
10.9754	0.369273
10.9937	0.382736
11.012	0.421202
11.0304	0.401969
11.0487	0.451975
11.067	0.432742
11.0854	0.3962
11.1037	0.463515
11.1221	0.411586
11.1404	0.467362
11.1587	0.421202
11.1771	0.451975
11.1954	0.444282
11.2137	0.442359
11.2321	0.430819
11.2504	0.413509
11.2687	0.473132
11.2871	0.425049
11.3054	0.461592
11.3238	0.446205
11.3421	0.425049
11.3604	0.411586
11.3788	0.411586
11.3971	0.434666
11.4154	0.453899
11.4338	0.411586
11.4521	0.409663
11.4705	0.37889
11.4888	0.380813
11.5071	0.473132
11.5255	0.417356
11.5438	0.394276
11.5621	0.419279
11.5805	0.405816
11.5988	0.375043
11.6171	0.357734
11.6355	0.407739
11.6538	0.407739
11.6722	0.369273
11.6905	0.403893
11.7088	0.38466
11.7272	0.413509
11.7455	0.38466
11.7638	0.413509
11.7822	0.413509
11.8005	0.409663
11.8189	0.430819
11.8372	0.365427
11.8555	0.423126
11.8739	0.417356
11.8922	0.409663
11.9105	0.411586
11.9289	0.39043
11.9472	0.421202
11.9655	0.401969
11.9839	0.388506
12.0022	0.432742
12.0206	0.419279
12.0389	0.409663
12.0572	0.513521
12.0756	0.326961
12.0939	0.392353
12.1122	0.376967
12.1306	0.36735
12.1489	0.425049
12.1673	0.430819
12.1856	0.455822
12.2039	0.369273
12.2223	0.438512
12.2406	0.440435
12.2589	0.417356
12.2773	0.394276
12.2956	0.415433
12.3139	0.405816
12.3323	0.459668
12.3506	0.434666
12.369	0.401969
12.3873	0.415433
12.4056	0.486595
12.424	0.425049
12.4423	0.482748
12.4606	0.438512
12.479	0.482748
12.4973	0.407739
12.5157	0.526984
12.534	0.515444
12.5523	0.525061
12.5707	0.526984
12.589	0.563527
12.6073	0.644305
12.6257	0.790476
12.644	0.75201
12.6624	0.817402
12.6807	0.852021
12.699	0.940493
12.7174	1.02127
12.7357	1.14436
12.754	1.37131
12.7724	1.53287
12.7907	1.65596
12.809	1.90214
12.8274	2.12909
12.8457	2.45413
12.8641	2.61569
12.8824	2.65223
12.9007	2.16756
12.9191	1.90984
12.9374	1.4694
12.9557	1.11359
12.9741	0.875101
12.9924	0.655845
13.0108	0.598146
13.0291	0.569296
13.0474	0.473132
13.0658	0.455822
13.0841	0.428896
13.1024	0.434666
13.1208	0.467362
13.1391	0.426972
13.1574	0.440435
13.1758	0.392353
13.1941	0.440435
13.2125	0.430819
13.2308	0.417356
13.2491	0.417356
13.2675	0.428896
13.2858	0.3962
13.3041	0.328884
13.3225	0.37312
13.3408	0.388506
13.3592	0.35581
13.3775	0.323114
13.3958	0.363503
13.4142	0.353887
13.4325	0.382736
13.4508	0.340424
13.4692	0.36735
13.4875	0.386583
13.5058	0.328884
13.5242	0.319268
13.5425	0.394276
13.5609	0.37312
13.5792	0.348117
13.5975	0.35004
13.6159	0.415433
13.6342	0.332731
13.6525	0.334654
13.6709	0.37889
13.6892	0.35581
13.7076	0.346194
13.7259	0.342347
13.7442	0.351964
13.7626	0.357734
13.7809	0.325038
13.7992	0.332731
13.8176	0.359657
13.8359	0.328884
13.8542	0.359657
13.8726	0.35581
13.8909	0.36735
13.9093	0.342347
13.9276	0.369273
13.9459	0.363503
13.9643	0.315421
13.9826	0.338501
14.0009	0.392353
14.0193	0.386583
14.0376	0.36158
14.056	0.286572
14.0743	0.338501
14.0926	0.315421
14.111	0.375043
14.1293	0.363503
14.1476	0.351964
14.166	0.36735
14.1843	0.309651
14.2026	0.351964
14.221	0.37312
14.2393	0.35581
14.2577	0.38466
14.276	0.401969
14.2943	0.351964
14.3127	0.37889
14.331	0.332731
14.3493	0.37312
14.3677	0.371197
14.386	0.351964
14.4044	0.351964
14.4227	0.303881
14.441	0.330807
14.4594	0.338501
14.4777	0.376967
14.496	0.348117
14.5144	0.342347
14.5327	0.38466
14.5511	0.353887
14.5694	0.407739
14.5877	0.37312
14.6061	0.37889
14.6244	0.451975
14.6427	0.405816
14.6611	0.417356
14.6794	0.400046
14.6977	0.386583
14.7161	0.428896
14.7344	0.409663
14.7528	0.436589
14.7711	0.450052
14.7894	0.428896
14.8078	0.505828
14.8261	0.450052
14.8444	0.507751
14.8628	0.457745
14.8811	0.451975
14.8995	0.434666
14.9178	0.455822
14.9361	0.386583
14.9545	0.353887
14.9728	0.371197
14.9911	0.38466
15.0095	0.348117
15.0278	0.319268
15.0461	0.332731
15.0645	0.382736
15.0828	0.311574
15.1012	0.328884
15.1195	0.380813
15.1378	0.334654
15.1562	0.319268
15.1745	0.313498
15.1928	0.394276
15.2112	0.35004
15.2295	0.376967
15.2479	0.37312
15.2662	0.359657
15.2845	0.323114
15.3029	0.336577
15.3212	0.353887
15.3395	0.323114
15.3579	0.346194
15.3762	0.346194
15.3945	0.330807
15.4129	0.353887
15.4312	0.371197
15.4496	0.359657
15.4679	0.321191
15.4862	0.290418
15.5046	0.36158
15.5229	0.319268
15.5412	0.348117
15.5596	0.321191
15.5779	0.325038
15.5963	0.307728
15.6146	0.357734
15.6329	0.332731
15.6513	0.328884
15.6696	0.369273
15.6879	0.342347
15.7063	0.369273
15.7246	0.401969
15.7429	0.336577
15.7613	0.405816
15.7796	0.388506
15.798	0.35004
15.8163	0.417356
15.8346	0.419279
15.853	0.346194
15.8713	0.459668
15.8896	0.461592
15.908	0.523137
15.9263	0.53083
15.9447	0.55391
15.963	0.607762
15.9813	0.540447
15.9997	0.613532
16.018	0.655845
16.0363	0.725084
16.0547	0.678924
16.073	0.753933
16.0914	0.680848
16.1097	0.659691
16.128	0.673155
16.1464	0.669308
16.1647	0.569296
16.183	0.55968
16.2014	0.578913
16.2197	0.488518
16.238	0.500058
16.2564	0.444282
16.2747	0.413509
16.2931	0.421202
16.3114	0.440435
16.3297	0.359657
16.3481	0.388506
16.3664	0.386583
16.3847	0.415433
16.4031	0.357734
16.4214	0.342347
16.4398	0.292341
16.4581	0.376967
16.4764	0.338501
16.4948	0.336577
16.5131	0.328884
16.5314	0.348117
16.5498	0.400046
16.5681	0.34427
16.5864	0.359657
16.6048	0.359657
16.6231	0.359657
16.6415	0.392353
16.6598	0.353887
16.6781	0.36735
16.6965	0.328884
16.7148	0.328884
16.7331	0.340424
16.7515	0.317344
16.7698	0.357734
16.7882	0.357734
16.8065	0.323114
16.8248	0.305805
16.8432	0.365427
16.8615	0.292341
16.8798	0.307728
16.8982	0.317344
16.9165	0.375043
16.9348	0.348117
16.9532	0.35581
16.9715	0.325038
16.9899	0.326961
17.0082	0.37889
17.0265	0.332731
17.0449	0.323114
17.0632	0.37889
17.0815	0.382736
17.0999	0.369273
17.1182	0.338501
17.1366	0.334654
17.1549	0.375043
17.1732	0.394276
17.1916	0.311574
17.2099	0.351964
17.2282	0.319268
17.2466	0.334654
17.2649	0.359657
17.2832	0.332731
17.3016	0.375043
17.3199	0.36158
17.3383	0.426972
17.3566	0.38466
17.3749	0.392353
17.3933	0.369273
17.4116	0.394276
17.4299	0.409663
17.4483	0.411586
17.4666	0.451975
17.485	0.411586
17.5033	0.380813
17.5216	0.478901
17.54	0.473132
17.5583	0.465438
17.5766	0.525061
17.595	0.540447
17.6133	0.569296
17.6316	0.5366
17.65	0.682771
17.6683	0.659691
17.6867	0.663538
17.705	0.705851
17.7233	0.727007
17.7417	0.703927
17.76	0.827018
17.7783	0.715467
17.7967	0.730854
17.815	0.651998
17.8334	0.640459
17.8517	0.609686
17.87	0.563527
17.8884	0.532754
17.9067	0.503904
17.925	0.440435
17.9434	0.444282
17.9617	0.465438
17.9801	0.38466
17.9984	0.39043
18.0167	0.388506
18.0351	0.450052
18.0534	0.426972
18.0717	0.421202
18.0901	0.365427
18.1084	0.425049
18.1267	0.392353
18.1451	0.415433
18.1634	0.434666
18.1818	0.413509
18.2001	0.430819
18.2184	0.411586
18.2368	0.423126
18.2551	0.432742
18.2734	0.461592
18.2918	0.36735
18.3101	0.463515
18.3285	0.450052
18.3468	0.363503
18.3651	0.401969
18.3835	0.411586
18.4018	0.3962
18.4201	0.36158
18.4385	0.415433
18.4568	0.371197
18.4751	0.419279
18.4935	0.415433
18.5118	0.476978
18.5302	0.36735
18.5485	0.413509
18.5668	0.413509
18.5852	0.409663
18.6035	0.411586
18.6218	0.338501
18.6402	0.386583
18.6585	0.37889
18.6769	0.405816
18.6952	0.394276
18.7135	0.423126
18.7319	0.407739
18.7502	0.388506
18.7685	0.469285
18.7869	0.398123
18.8052	0.411586
18.8235	0.392353
18.8419	0.430819
18.8602	0.450052
18.8786	0.394276
18.8969	0.446205
18.9152	0.430819
18.9336	0.428896
18.9519	0.455822
18.9702	0.442359
18.9886	0.430819
19.0069	0.405816
19.0253	0.400046
19.0436	0.411586
19.0619	0.430819
19.0803	0.434666
19.0986	0.457745
19.1169	0.492365
19.1353	0.459668
19.1536	0.494288
19.1719	0.475055
19.1903	0.532754
19.2086	0.578913
19.227	0.54237
19.2453	0.57699
19.2636	0.578913
19.282	0.671231
19.3003	0.567373
19.3186	0.600069
19.337	0.684694
19.3553	0.759703
19.3737	0.659691
19.392	0.736623
19.4103	0.784706
19.4287	0.859715
19.447	0.971266
19.4653	1.05974
19.4837	1.17514
19.502	1.30592
19.5204	1.53479
19.5387	1.72328
19.557	2.01562
19.5754	2.61184
19.5937	2.9061
19.612	3.50425
19.6304	4.41782
19.6487	5.29869
19.667	6.51229
19.6854	7.4874
19.7037	8.61446
19.7221	9.22029
19.7404	8.96834
19.7587	8.49136
19.7771	7.0989
19.7954	5.85068
19.8137	4.33896
19.8321	3.17921
19.8504	2.45798
19.8688	1.98484
19.8871	1.57711
19.9054	1.1886
19.9238	1.10205
19.9421	0.940493
19.9604	0.894334
19.9788	0.796246
19.9971	0.74624
20.0154	0.738547
20.0338	0.684694
20.0521	0.628919
20.0705	0.561603
20.0888	0.54237
20.1071	0.569296
20.1255	0.588529
20.1438	0.505828
20.1621	0.54237
20.1805	0.540447
20.1988	0.501981
20.2172	0.476978
20.2355	0.523137
20.2538	0.482748
20.2722	0.505828
20.2905	0.451975
20.3088	0.511597
20.3272	0.486595
20.3455	0.471208
20.3638	0.425049
20.3822	0.467362
20.4005	0.494288
20.4189	0.467362
20.4372	0.455822
20.4555	0.488518
20.4739	0.405816
20.4922	0.459668
20.5105	0.450052
20.5289	0.484671
20.5472	0.455822
20.5656	0.492365
20.5839	0.455822
20.6022	0.484671
20.6206	0.457745
20.6389	0.471208
20.6572	0.507751
20.6756	0.428896
20.6939	0.459668
20.7122	0.478901
20.7306	0.517367
20.7489	0.500058
20.7673	0.455822
20.7856	0.438512
20.8039	0.463515
20.8223	0.484671
20.8406	0.442359
20.8589	0.455822
20.8773	0.453899
20.8956	0.484671
20.914	0.457745
20.9323	0.513521
20.9506	0.538524
20.969	0.476978
20.9873	0.515444
21.0056	0.538524
21.024	0.515444
21.0423	0.584683
21.0607	0.619302
21.079	0.628919
21.0973	0.594299
21.1157	0.619302
21.134	0.592376
21.1523	0.580836
21.1707	0.640459
21.189	0.600069
21.2073	0.592376
21.2257	0.490441
21.244	0.567373
21.2624	0.517367
21.2807	0.511597
21.299	0.54814
21.3174	0.503904
21.3357	0.509674
21.354	0.453899
21.3724	0.519291
21.3907	0.555833
21.4091	0.471208
21.4274	0.498134
21.4457	0.55968
21.4641	0.53083
21.4824	0.528907
21.5007	0.490441
21.5191	0.525061
21.5374	0.621226
21.5557	0.665461
21.5741	0.544294
21.5924	0.623149
21.6108	0.653922
21.6291	0.630842
21.6474	0.684694
21.6658	0.75201
21.6841	0.803939
21.7024	0.844328
21.7208	0.855868
21.7391	0.930877
21.7575	1.01935
21.7758	1.17129
21.7941	1.16167
21.8125	1.4117
21.8308	1.5598
21.8491	1.93292
21.8675	2.01562
21.8858	2.26949
21.9041	2.61184
21.9225	2.81379
21.9408	3.19652
21.9592	3.46963
21.9775	3.69273
21.9958	3.5658
22.0142	3.22153
22.0325	2.93111
22.0508	2.74455
22.0692	2.44451
22.0875	2.16948
22.1059	1.85983
22.1242	1.70981
22.1425	1.57518
22.1609	1.329
22.1792	1.25976
22.1975	1.14052
22.2159	1.04627
22.2342	1.05589
22.2525	1.10397
22.2709	1.00012
22.2892	1.1636
22.3076	1.18091
22.3259	1.40593
22.3442	1.50402
22.3626	1.57326
22.3809	1.66365
22.3992	1.86368
22.4176	1.78482
22.4359	1.77905
22.4543	1.50017
22.4726	1.3617
22.4909	1.15398
22.5093	1.06743
22.5276	0.913567
22.5459	0.780859
22.5643	0.74624
22.5826	0.692388
22.6009	0.603916
22.6193	0.626995
22.6376	0.551987
22.656	0.521214
22.6743	0.546217
22.6926	0.523137
22.711	0.450052
22.7293	0.478901
22.7476	0.461592
22.766	0.494288
22.7843	0.440435
22.8027	0.428896
22.821	0.467362
22.8393	0.461592
22.8577	0.492365
22.876	0.405816
22.8943	0.38466
22.9127	0.442359
22.931	0.403893
22.9494	0.438512
22.9677	0.380813
22.986	0.413509
23.0044	0.353887
23.0227	0.35581
23.041	0.417356
23.0594	0.440435
23.0777	0.400046
23.096	0.3962
23.1144	0.400046
23.1327	0.440435
23.1511	0.382736
23.1694	0.417356
23.1877	0.400046
23.2061	0.376967
23.2244	0.409663
23.2427	0.394276
23.2611	0.409663
23.2794	0.37312
23.2978	0.363503
23.3161	0.425049
23.3344	0.459668
23.3528	0.375043
23.3711	0.455822
23.3894	0.365427
23.4078	0.423126
23.4261	0.363503
23.4444	0.450052
23.4628	0.403893
23.4811	0.411586
23.4995	0.428896
23.5178	0.403893
23.5361	0.409663
23.5545	0.444282
23.5728	0.478901
23.5911	0.451975
23.6095	0.473132
23.6278	0.503904
23.6462	0.500058
23.6645	0.463515
23.6828	0.459668
23.7012	0.453899
23.7195	0.392353
23.7378	0.446205
23.7562	0.455822
23.7745	0.405816
23.7928	0.3962
23.8112	0.401969
23.8295	0.434666
23.8479	0.417356
23.8662	0.457745
23.8845	0.37312
23.9029	0.448129
23.9212	0.409663
23.9395	0.417356
23.9579	0.438512
23.9762	0.413509
23.9946	0.38466
24.0129	0.401969
24.0312	0.469285
24.0496	0.457745
24.0679	0.455822
24.0862	0.423126
24.1046	0.440435
24.1229	0.484671
24.1412	0.455822
24.1596	0.538524
24.1779	0.532754
24.1963	0.611609
24.2146	0.605839
24.2329	0.640459
24.2513	0.74047
24.2696	0.775089
24.2879	0.880871
24.3063	0.93857
24.3246	0.998192
24.343	1.09628
24.3613	1.26553
24.3796	1.30015
24.398	1.42901
24.4163	1.56557
24.4346	1.53672
24.453	1.304
24.4713	1.31169
24.4897	1.21937
24.508	1.18475
24.5263	1.04627
24.5447	0.961649
24.563	0.863561
24.5813	0.857791
24.5997	0.72893
24.618	0.634689
24.6363	0.646228
24.6547	0.528907
24.673	0.57699
24.6914	0.634689
24.7097	0.575066
24.728	0.55391
24.7464	0.605839
24.7647	0.55391
24.783	0.625072
24.8014	0.617379
24.8197	0.609686
24.8381	0.55968
24.8564	0.594299
24.8747	0.54814
24.8931	0.517367
24.9114	0.476978
24.9297	0.492365
24.9481	0.488518
24.9664	0.421202
24.9847	0.450052
25.0031	0.415433
25.0214	0.419279
25.0398	0.401969
25.0581	0.430819
25.0764	0.411586
25.0948	0.371197
25.1131	0.330807
25.1314	0.330807
25.1498	0.426972
25.1681	0.319268
25.1865	0.35004
25.2048	0.3962
25.2231	0.317344
25.2415	0.336577
25.2598	0.303881
25.2781	0.35004
25.2965	0.317344
25.3148	0.340424
25.3331	0.321191
25.3515	0.296188
25.3698	0.35004
25.3882	0.35004
25.4065	0.300035
25.4248	0.286572
25.4432	0.309651
25.4615	0.311574
25.4798	0.282725
25.4982	0.303881
25.5165	0.305805
25.5349	0.382736
25.5532	0.265415
25.5715	0.305805
25.5899	0.309651
25.6082	0.288495
25.6265	0.351964
25.6449	0.326961
25.6632	0.353887
25.6815	0.288495
25.6999	0.34427
25.7182	0.321191
25.7366	0.357734
25.7549	0.36735
25.7732	0.37312
25.7916	0.382736
25.8099	0.388506
25.8282	0.426972
25.8466	0.423126
25.8649	0.463515
25.8833	0.498134
25.9016	0.463515
25.9199	0.505828
25.9383	0.451975
25.9566	0.442359
25.9749	0.405816
25.9933	0.409663
26.0116	0.380813
26.0299	0.351964
26.0483	0.386583
26.0666	0.380813
26.085	0.303881
26.1033	0.346194
26.1216	0.325038
26.14	0.326961
26.1583	0.340424
26.1766	0.307728
26.195	0.286572
26.2133	0.300035
26.2317	0.271185
26.25	0.303881
26.2683	0.288495
26.2867	0.311574
26.305	0.298111
26.3233	0.342347
26.3417	0.273108
26.36	0.303881
26.3784	0.273108
26.3967	0.317344
26.415	0.271185
26.4334	0.315421
26.4517	0.267339
26.47	0.265415
26.4884	0.275032
26.5067	0.309651
26.525	0.336577
26.5434	0.319268
26.5617	0.269262
26.5801	0.301958
26.5984	0.307728
26.6167	0.300035
26.6351	0.269262
26.6534	0.315421
26.6717	0.307728
26.6901	0.336577
26.7084	0.323114
26.7268	0.321191
26.7451	0.330807
26.7634	0.336577
26.7818	0.336577
26.8001	0.336577
26.8184	0.34427
26.8368	0.363503
26.8551	0.421202
26.8734	0.438512
26.8918	0.357734
26.9101	0.369273
26.9285	0.450052
26.9468	0.475055
26.9651	0.467362
26.9835	0.451975
27.0018	0.517367
27.0201	0.438512
27.0385	0.496211
27.0568	0.438512
27.0752	0.465438
27.0935	0.446205
27.1118	0.380813
27.1302	0.37889
27.1485	0.365427
27.1668	0.332731
27.1852	0.342347
27.2035	0.415433
27.2218	0.346194
27.2402	0.340424
27.2585	0.307728
27.2769	0.348117
27.2952	0.340424
27.3135	0.353887
27.3319	0.351964
27.3502	0.371197
27.3685	0.35004
27.3869	0.415433
27.4052	0.346194
27.4236	0.428896
27.4419	0.369273
27.4602	0.509674
27.4786	0.438512
27.4969	0.507751
27.5152	0.467362
27.5336	0.534677
27.5519	0.54814
27.5702	0.630842
27.5886	0.703927
27.6069	0.76932
27.6253	0.830865
27.6436	0.880871
27.6619	1.00012
27.6803	1.02512
27.6986	1.02127
27.7169	1.06551
27.7353	0.992422
27.7536	1.02319
27.772	0.886641
27.7903	0.859715
27.8086	0.798169
27.827	0.644305
27.8453	0.659691
27.8636	0.567373
27.882	0.563527
27.9003	0.488518
27.9187	0.501981
27.937	0.519291
27.9553	0.448129
27.9737	0.432742
27.992	0.363503
28.0103	0.401969
28.0287	0.394276
28.047	0.359657
28.0653	0.365427
28.0837	0.380813
28.102	0.342347
28.1204	0.375043
28.1387	0.380813
28.157	0.382736
28.1754	0.325038
28.1937	0.311574
28.212	0.317344
28.2304	0.328884
28.2487	0.315421
28.2671	0.35004
28.2854	0.315421
28.3037	0.326961
28.3221	0.317344
28.3404	0.332731
28.3587	0.336577
28.3771	0.376967
28.3954	0.307728
28.4137	0.365427
28.4321	0.415433
28.4504	0.36735
28.4688	0.434666
28.4871	0.419279
28.5054	0.519291
28.5238	0.388506
28.5421	0.478901
28.5604	0.607762
28.5788	0.586606
28.5971	0.650075
28.6155	0.665461
28.6338	0.827018
28.6521	0.992422
28.6705	1.03281
28.6888	1.07512
28.7071	1.11936
28.7255	1.22514
28.7438	1.1886
28.7621	1.16552
28.7805	1.09436
28.7988	0.977036
28.8172	0.832788
28.8355	0.786629
28.8538	0.655845
28.8722	0.650075
28.8905	0.540447
28.9088	0.450052
28.9272	0.455822
28.9455	0.411586
28.9639	0.37889
28.9822	0.400046
29.0005	0.38466
29.0189	0.332731
29.0372	0.36158
29.0555	0.36735
29.0739	0.375043
29.0922	0.288495
29.1105	0.298111
29.1289	0.294265
29.1472	0.288495
29.1656	0.290418
29.1839	0.257722
29.2022	0.278878
29.2206	0.236566
29.2389	0.280802
29.2572	0.261569
29.2756	0.263492
29.2939	0.257722
29.3123	0.242336
29.3306	0.298111
29.3489	0.244259
29.3673	0.261569
29.3856	0.246182
29.4039	0.286572
29.4223	0.265415
29.4406	0.248106
29.459	0.276955
29.4773	0.294265
29.4956	0.275032
29.514	0.280802
29.5323	0.292341
29.5506	0.288495
29.569	0.257722
29.5873	0.201946
29.6056	0.217333
29.624	0.282725
29.6423	0.273108
29.6607	0.288495
29.679	0.273108
29.6973	0.290418
29.7157	0.303881
29.734	0.301958
29.7523	0.276955
29.7707	0.269262
29.789	0.301958
29.8074	0.282725
29.8257	0.284648
29.844	0.234642
29.8624	0.269262
29.8807	0.246182
29.899	0.267339
29.9174	0.248106
29.9357	0.276955
29.954	0.265415
29.9724	0.226949
29.9907	0.300035
30.0091	0.278878
30.0274	0.263492
30.0457	0.275032
30.0641	0.284648
30.0824	0.263492
30.1007	0.319268
30.1191	0.240412
30.1374	0.267339
30.1558	0.236566
30.1741	0.236566
30.1924	0.228873
30.2108	0.246182
30.2291	0.250029
30.2474	0.200023
30.2658	0.257722
30.2841	0.213486
30.3024	0.232719
30.3208	0.251952
30.3391	0.207716
30.3575	0.207716
30.3758	0.18079
30.3941	0.253875
30.4125	0.226949
30.4308	0.196176
30.4491	0.230796
30.4675	0.19233
30.4858	0.18656
30.5042	0.213486
30.5225	0.228873
30.5408	0.267339
30.5592	0.236566
30.5775	0.200023
30.5958	0.196176
30.6142	0.234642
30.6325	0.223103
30.6508	0.221179
30.6692	0.194253
30.6875	0.248106
30.7059	0.19233
30.7242	0.207716
30.7425	0.190407
30.7609	0.211563
30.7792	0.228873
30.7975	0.221179
30.8159	0.236566
30.8342	0.201946
30.8526	0.184637
30.8709	0.205793
30.8892	0.226949
30.9076	0.226949
30.9259	0.219256
30.9442	0.275032
30.9626	0.221179
30.9809	0.286572
30.9992	0.242336
31.0176	0.250029
31.0359	0.234642
31.0543	0.234642
31.0726	0.232719
31.0909	0.20387
31.1093	0.1981
31.1276	0.184637
31.1459	0.257722
31.1643	0.232719
31.1826	0.242336
31.201	0.217333
31.2193	0.230796
31.2376	0.250029
31.256	0.250029
31.2743	0.20964
31.2926	0.17502
31.311	0.242336
31.3293	0.225026
31.3477	0.280802
31.366	0.236566
31.3843	0.275032
31.4027	0.269262
31.421	0.296188
31.4393	0.232719
31.4577	0.296188
31.476	0.292341
31.4943	0.365427
31.5127	0.346194
31.531	0.348117
31.5494	0.39043
31.5677	0.438512
31.586	0.405816
31.6044	0.407739
31.6227	0.465438
31.641	0.453899
31.6594	0.432742
31.6777	0.325038
31.6961	0.34427
31.7144	0.365427
31.7327	0.348117
31.7511	0.315421
31.7694	0.271185
31.7877	0.282725
31.8061	0.253875
31.8244	0.288495
31.8427	0.290418
31.8611	0.305805
31.8794	0.300035
31.8978	0.309651
31.9161	0.300035
31.9344	0.330807
31.9528	0.300035
31.9711	0.307728
31.9894	0.290418
32.0078	0.271185
32.0261	0.232719
32.0445	0.215409
32.0628	0.234642
32.0811	0.246182
32.0995	0.219256
32.1178	0.223103
32.1361	0.213486
32.1545	0.188483
32.1728	0.251952
32.1911	0.205793
32.2095	0.234642
32.2278	0.207716
32.2462	0.225026
32.2645	0.182713
32.2828	0.19233
32.3012	0.1981
32.3195	0.201946
32.3378	0.217333
32.3562	0.178867
32.3745	0.190407
32.3929	0.226949
32.4112	0.201946
32.4295	0.19233
32.4479	0.248106
32.4662	0.228873
32.4845	0.221179
32.5029	0.1981
32.5212	0.211563
32.5395	0.215409
32.5579	0.211563
32.5762	0.255799
32.5946	0.226949
32.6129	0.19233
32.6312	0.238489
32.6496	0.219256
32.6679	0.219256
32.6862	0.244259
32.7046	0.257722
32.7229	0.251952
32.7413	0.286572
32.7596	0.298111
32.7779	0.263492
32.7963	0.255799
32.8146	0.275032
32.8329	0.253875
32.8513	0.253875
32.8696	0.248106
32.888	0.236566
32.9063	0.221179
32.9246	0.221179
32.943	0.217333
32.9613	0.223103
32.9796	0.244259
32.998	0.184637
33.0163	0.230796
33.0346	0.196176
33.053	0.215409
33.0713	0.165404
33.0897	0.190407
33.108	0.242336
33.1263	0.201946
33.1447	0.16348
33.163	0.200023
33.1813	0.217333
33.1997	0.226949
33.218	0.213486
33.2364	0.1981
33.2547	0.178867
33.273	0.246182
33.2914	0.226949
33.3097	0.223103
33.328	0.184637
33.3464	0.221179
33.3647	0.215409
33.383	0.205793
33.4014	0.182713
33.4197	0.248106
33.4381	0.190407
33.4564	0.20387
33.4747	0.196176
33.4931	0.20387
33.5114	0.20387
33.5297	0.184637
33.5481	0.176943
33.5664	0.200023
33.5848	0.226949
33.6031	0.217333
33.6214	0.20964
33.6398	0.201946
33.6581	0.215409
33.6764	0.207716
33.6948	0.182713
33.7131	0.238489
33.7314	0.201946
33.7498	0.17502
33.7681	0.196176
33.7865	0.221179
33.8048	0.219256
33.8231	0.171174
33.8415	0.228873
33.8598	0.250029
33.8781	0.248106
33.8965	0.207716
33.9148	0.257722
33.9332	0.221179
33.9515	0.226949
33.9698	0.234642
33.9882	0.255799
34.0065	0.278878
34.0248	0.290418
34.0432	0.265415
34.0615	0.309651
34.0798	0.376967
34.0982	0.338501
34.1165	0.413509
34.1349	0.417356
34.1532	0.509674
34.1715	0.503904
34.1899	0.555833
34.2082	0.550063
34.2265	0.619302
34.2449	0.665461
34.2632	0.675078
34.2816	0.642382
34.2999	0.588529
34.3182	0.640459
34.3366	0.55968
34.3549	0.492365
34.3732	0.451975
34.3916	0.432742
34.4099	0.388506
34.4282	0.442359
34.4466	0.300035
34.4649	0.290418
34.4833	0.294265
34.5016	0.253875
34.5199	0.259645
34.5383	0.228873
34.5566	0.248106
34.5749	0.240412
34.5933	0.236566
34.6116	0.236566
34.63	0.269262
34.6483	0.303881
34.6666	0.223103
34.685	0.217333
34.7033	0.201946
34.7216	0.223103
34.74	0.200023
34.7583	0.215409
34.7767	0.171174
34.795	0.226949
34.8133	0.1981
34.8317	0.223103
34.85	0.188483
34.8683	0.211563
34.8867	0.18079
34.905	0.1981
34.9233	0.176943
34.9417	0.178867
34.96	0.18079
34.9784	0.18656
34.9967	0.20964
35.015	0.188483
35.0334	0.184637
35.0517	0.17502
35.07	0.173097
35.0884	0.20964
35.1067	0.18656
35.1251	0.18656
35.1434	0.182713
35.1617	0.18079
35.1801	0.20387
35.1984	0.182713
35.2167	0.200023
35.2351	0.190407
35.2534	0.173097
35.2717	0.188483
35.2901	0.205793
35.3084	0.184637
35.3268	0.16348
35.3451	0.188483
35.3634	0.219256
35.3818	0.200023
35.4001	0.19233
35.4184	0.232719
35.4368	0.215409
35.4551	0.201946
35.4735	0.176943
35.4918	0.225026
35.5101	0.207716
35.5285	0.159634
35.5468	0.205793
35.5651	0.223103
35.5835	0.178867
35.6018	0.215409
35.6201	0.207716
35.6385	0.236566
35.6568	0.282725
35.6752	0.242336
35.6935	0.190407
35.7118	0.223103
35.7302	0.275032
35.7485	0.240412
35.7668	0.288495
35.7852	0.278878
35.8035	0.359657
35.8219	0.311574
35.8402	0.401969
35.8585	0.455822
35.8769	0.453899
35.8952	0.496211
35.9135	0.473132
35.9319	0.492365
35.9502	0.463515
35.9685	0.496211
35.9869	0.403893
36.0052	0.471208
36.0236	0.413509
36.0419	0.394276
36.0602	0.413509
36.0786	0.363503
36.0969	0.303881
36.1152	0.313498
36.1336	0.280802
36.1519	0.323114
36.1703	0.282725
36.1886	0.271185
36.2069	0.255799
36.2253	0.275032
36.2436	0.263492
36.2619	0.253875
36.2803	0.273108
36.2986	0.253875
36.317	0.230796
36.3353	0.250029
36.3536	0.207716
36.372	0.221179
36.3903	0.215409
36.4086	0.188483
36.427	0.188483
36.4453	0.196176
36.4636	0.18656
36.482	0.205793
36.5003	0.18079
36.5187	0.19233
36.537	0.196176
36.5553	0.211563
36.5737	0.19233
36.592	0.18079
36.6103	0.178867
36.6287	0.196176
36.647	0.236566
36.6654	0.221179
36.6837	0.226949
36.702	0.219256
36.7204	0.165404
36.7387	0.18079
36.757	0.184637
36.7754	0.20387
36.7937	0.1981
36.812	0.196176
36.8304	0.173097
36.8487	0.215409
36.8671	0.226949
36.8854	0.215409
36.9037	0.228873
36.9221	0.1981
36.9404	0.201946
36.9587	0.201946
36.9771	0.228873
36.9954	0.280802
37.0138	0.236566
37.0321	0.201946
37.0504	0.226949
37.0688	0.251952
37.0871	0.228873
37.1054	0.232719
37.1238	0.223103
37.1421	0.207716
37.1604	0.188483
37.1788	0.173097
37.1971	0.213486
37.2155	0.190407
37.2338	0.153864
37.2521	0.225026
37.2705	0.230796
37.2888	0.242336
37.3071	0.234642
37.3255	0.17502
37.3438	0.196176
37.3622	0.167327
37.3805	0.20387
37.3988	0.150017
37.4172	0.196176
37.4355	0.167327
37.4538	0.136554
37.4722	0.153864
37.4905	0.18079
37.5088	0.159634
37.5272	0.188483
37.5455	0.144247
37.5639	0.176943
37.5822	0.134631
37.6005	0.207716
37.6189	0.155787
37.6372	0.178867
37.6555	0.18656
37.6739	0.167327
37.6922	0.1981
37.7106	0.157711
37.7289	0.194253
37.7472	0.205793
37.7656	0.190407
37.7839	0.178867
37.8022	0.18656
37.8206	0.16925
37.8389	0.16925
37.8573	0.1981
37.8756	0.136554
37.8939	0.20387
37.9123	0.182713
37.9306	0.194253
37.9489	0.173097
37.9673	0.176943
37.9856	0.16925
38.0039	0.159634
38.0223	0.18656
38.0406	0.161557
38.059	0.217333
38.0773	0.167327
38.0956	0.16348
38.114	0.196176
38.1323	0.194253
38.1506	0.173097
38.169	0.178867
38.1873	0.153864
38.2057	0.196176
38.224	0.165404
38.2423	0.167327
38.2607	0.165404
38.279	0.16925
38.2973	0.18656
38.3157	0.136554
38.334	0.184637
38.3523	0.182713
38.3707	0.159634
38.389	0.151941
38.4074	0.167327
38.4257	0.16348
38.444	0.182713
38.4624	0.190407
38.4807	0.167327
38.499	0.196176
38.5174	0.16925
38.5357	0.161557
38.5541	0.190407
38.5724	0.176943
38.5907	0.159634
38.6091	0.196176
38.6274	0.176943
38.6457	0.17502
38.6641	0.207716
38.6824	0.151941
38.7007	0.223103
38.7191	0.165404
38.7374	0.1981
38.7558	0.165404
38.7741	0.205793
38.7924	0.171174
38.8108	0.167327
38.8291	0.155787
38.8474	0.171174
38.8658	0.17502
38.8841	0.18079
38.9025	0.200023
38.9208	0.165404
38.9391	0.18656
38.9575	0.19233
38.9758	0.232719
38.9941	0.194253
39.0125	0.20964
39.0308	0.171174
39.0491	0.201946
39.0675	0.20964
39.0858	0.20387
39.1042	0.167327
39.1225	0.215409
39.1408	0.194253
39.1592	0.246182
39.1775	0.207716
39.1958	0.200023
39.2142	0.207716
39.2325	0.205793
39.2509	0.234642
39.2692	0.250029
39.2875	0.230796
39.3059	0.284648
39.3242	0.228873
39.3425	0.251952
39.3609	0.259645
39.3792	0.242336
39.3975	0.223103
39.4159	0.238489
39.4342	0.221179
39.4526	0.211563
39.4709	0.225026
39.4892	0.234642
39.5076	0.221179
39.5259	0.205793
39.5442	0.200023
39.5626	0.18656
39.5809	0.20964
39.5993	0.213486
39.6176	0.188483
39.6359	0.225026
39.6543	0.207716
39.6726	0.213486
39.6909	0.215409
39.7093	0.165404
39.7276	0.205793
39.746	0.219256
39.7643	0.226949
39.7826	0.184637
39.801	0.200023
39.8193	0.190407
39.8376	0.18079
39.856	0.201946
39.8743	0.190407
39.8926	0.211563
39.911	0.217333
39.9293	0.255799
39.9477	0.240412
39.966	0.213486
39.9843	0.257722
40.0027	0.253875
40.021	0.319268
40.0393	0.300035
40.0577	0.326961
40.076	0.386583
40.0944	0.346194
40.1127	0.371197
40.131	0.369273
40.1494	0.342347
40.1677	0.351964
40.186	0.307728
40.2044	0.275032
40.2227	0.286572
40.241	0.263492
40.2594	0.263492
40.2777	0.225026
40.2961	0.18656
40.3144	0.230796
40.3327	0.211563
40.3511	0.215409
40.3694	0.200023
40.3877	0.176943
40.4061	0.1981
40.4244	0.1981
40.4428	0.190407
40.4611	0.226949
40.4794	0.211563
40.4978	0.173097
40.5161	0.246182
40.5344	0.219256
[truncated: 1,056 more rows]

## Sheet: Heating 65 °C
2theta	Intensity
3.89731	1.48671
3.91565	1.50402
3.93399	1.40593
3.95232	1.4367
3.97066	1.43863
3.989	1.47132
4.00733	1.41362
4.02567	1.38862
4.04401	1.43863
4.06234	1.40401
4.08068	1.35785
4.09902	1.31361
4.11735	1.40016
4.13569	1.31361
4.15403	1.35016
4.17237	1.36362
4.1907	1.34054
4.20904	1.36747
4.22738	1.33285
4.24571	1.3617
4.26405	1.39055
4.28239	1.31554
4.30072	1.3617
4.31906	1.26745
4.3374	1.31361
4.35573	1.31554
4.37407	1.329
4.39241	1.28284
4.41075	1.2136
4.42908	1.39631
4.44742	1.20399
4.46576	1.23283
4.48409	1.23476
4.50243	1.18283
4.52077	1.34439
4.5391	1.19822
4.55744	1.29438
4.57578	1.26745
4.59411	1.26745
4.61245	1.35785
4.63079	1.28284
4.64913	1.2713
4.66746	1.21552
4.6858	1.2713
4.70414	1.304
4.72247	1.24053
4.74081	1.24245
4.75915	1.304
4.77748	1.22514
4.79582	1.28476
4.81416	1.19245
4.83249	1.2386
4.85083	1.20014
4.86917	1.17898
4.8875	1.1559
4.90584	1.22706
4.92418	1.22129
4.94252	1.2463
4.96085	1.12705
4.97919	1.1059
4.99753	1.24437
5.01586	1.08859
5.0342	1.09051
5.05254	1.12898
5.07087	1.18475
5.08921	1.10013
5.10755	1.08282
5.12588	1.09436
5.14422	1.20975
5.16256	1.06935
5.1809	1.10974
5.19923	1.09628
5.21757	1.14052
5.23591	1.17129
5.25424	1.13282
5.27258	1.13859
5.29092	1.15206
5.30925	1.14629
5.32759	1.1059
5.34593	1.13667
5.36426	1.02319
5.3826	1.12898
5.40094	1.10013
5.41927	1.1309
5.43761	1.09436
5.45595	1.15398
5.47429	1.08666
5.49262	1.13859
5.51096	1.00973
5.5293	1.17321
5.54763	1.10782
5.56597	1.03089
5.58431	1.14244
5.60264	1.03473
5.62098	1.08282
5.63932	1.17898
5.65765	1.09436
5.67599	1.06551
5.69433	1.06935
5.71267	1.10397
5.731	1.10013
5.74934	1.0482
5.76768	1.09243
5.78601	1.06358
5.80435	1.15398
5.82269	1.08859
5.84102	1.08282
5.85936	1.15206
5.8777	1.12128
5.89603	1.07897
5.91437	1.15398
5.93271	1.06358
5.95104	1.11936
5.96938	1.15783
5.98772	1.16167
6.00606	1.20399
6.02439	1.25207
6.04273	1.23476
6.06107	1.35593
6.0794	1.26168
6.09774	1.34823
6.11608	1.27515
6.13441	1.37516
6.15275	1.304
6.17109	1.2713
6.18942	1.3867
6.20776	1.37708
6.2261	1.4694
6.24444	1.54633
6.26277	1.41939
6.28111	1.56364
6.29945	1.59441
6.31778	1.53864
6.33612	1.73674
6.35446	1.79059
6.37279	1.74443
6.39113	1.92138
6.40947	1.90599
6.4278	1.91561
6.44614	1.88676
6.46448	2.13679
6.48282	2.24641
6.50115	2.20025
6.51949	2.39643
6.53783	2.44836
6.55616	2.53683
6.5745	2.68493
6.59284	2.87149
6.61117	3.04266
6.62951	3.30807
6.64785	3.58888
6.66618	3.70043
6.68452	3.78313
6.70286	4.11586
6.72119	4.28703
6.73953	4.55629
6.75787	4.87941
6.77621	5.21214
6.79454	5.54102
6.81288	5.84491
6.83122	6.24495
6.84955	6.82771
6.86789	7.37777
6.88623	7.974
6.90456	8.51444
6.9229	9.30684
6.94124	10.0569
6.95957	11.2975
6.97791	12.3226
6.99625	13.2804
7.01459	14.5421
7.03292	15.7672
7.05126	17.6713
7.0696	19.2695
7.08793	21.1217
7.10627	23.1373
7.12461	25.301
7.14294	27.8109
7.16128	30.0958
7.17962	33.7731
7.19795	37.0293
7.21629	41.4817
7.23463	45.8649
7.25296	52.8542
7.2713	59.178
7.28964	68.1944
7.30798	78.7956
7.32631	91.3759
7.34465	105.662
7.36299	120.139
7.38132	134.273
7.39966	142.918
7.418	141.203
7.43633	123.191
7.45467	96.8593
7.47301	73.3431
7.49134	54.1389
7.50968	38.2063
7.52802	27.1281
7.54636	20.4274
7.56469	16.7077
7.58303	13.0784
7.60137	9.62611
7.6197	6.99888
7.63804	5.31215
7.65638	3.987
7.67471	3.30038
7.69305	2.73878
7.71139	2.47913
7.72972	2.43105
7.74806	2.18294
7.7664	1.95407
7.78473	1.81944
7.80307	1.67712
7.82141	1.56364
7.83975	1.50594
7.85808	1.49248
7.87642	1.46171
7.89476	1.31361
7.91309	1.33285
7.93143	1.25014
7.94977	1.2136
7.9681	1.1309
7.98644	1.14821
8.00478	1.04435
8.02311	1.02896
8.04145	1.07705
8.05979	1.02896
8.07813	0.990499
8.09646	1.00781
8.1148	0.952033
8.13314	0.884717
8.15147	0.90395
8.16981	0.934723
8.18815	0.917414
8.20648	0.913567
8.22482	0.827018
8.24316	0.800092
8.26149	0.809709
8.27983	0.773166
8.29817	0.813555
8.3165	0.76355
8.33484	0.815479
8.35318	0.780859
8.37152	0.738547
8.38985	0.74047
8.40819	0.75778
8.42653	0.705851
8.44486	0.642382
8.4632	0.72316
8.48154	0.682771
8.49987	0.713544
8.51821	0.705851
8.53655	0.603916
8.55488	0.646228
8.57322	0.669308
8.59156	0.651998
8.6099	0.557757
8.62823	0.626995
8.64657	0.632765
8.66491	0.667385
8.68324	0.655845
8.70158	0.58276
8.71992	0.634689
8.73825	0.619302
8.75659	0.621226
8.77493	0.557757
8.79326	0.673155
8.8116	0.551987
8.82994	0.628919
8.84828	0.626995
8.86661	0.580836
8.88495	0.540447
8.90329	0.551987
8.92162	0.584683
8.93996	0.5366
8.9583	0.573143
8.97663	0.550063
8.99497	0.561603
9.01331	0.526984
9.03164	0.584683
9.04998	0.517367
9.06832	0.538524
9.08665	0.563527
9.10499	0.546217
9.12333	0.607762
9.14167	0.500058
9.16	0.55391
9.17834	0.592376
9.19668	0.621226
9.21501	0.551987
9.23335	0.513521
9.25169	0.54814
9.27002	0.596223
9.28836	0.494288
9.3067	0.54237
9.32503	0.573143
9.34337	0.517367
9.36171	0.53083
9.38005	0.575066
9.39838	0.538524
9.41672	0.509674
9.43506	0.523137
9.45339	0.528907
9.47173	0.534677
9.49007	0.469285
9.5084	0.505828
9.52674	0.505828
9.54508	0.505828
9.56341	0.488518
9.58175	0.551987
9.60009	0.501981
9.61842	0.486595
9.63676	0.476978
9.6551	0.498134
9.67344	0.546217
9.69177	0.451975
9.71011	0.478901
9.72845	0.465438
9.74678	0.515444
9.76512	0.507751
9.78346	0.523137
9.80179	0.500058
9.82013	0.484671
9.83847	0.517367
9.8568	0.505828
9.87514	0.507751
9.89348	0.501981
9.91182	0.453899
9.93015	0.501981
9.94849	0.486595
9.96683	0.473132
9.98516	0.494288
10.0035	0.494288
10.0218	0.480825
10.0402	0.494288
10.0585	0.484671
10.0768	0.544294
10.0952	0.492365
10.1135	0.498134
10.1319	0.451975
10.1502	0.519291
10.1685	0.450052
10.1869	0.496211
10.2052	0.426972
10.2235	0.471208
10.2419	0.440435
10.2602	0.469285
10.2786	0.409663
10.2969	0.430819
10.3152	0.494288
10.3336	0.428896
10.3519	0.476978
10.3702	0.492365
10.3886	0.473132
10.4069	0.394276
10.4252	0.450052
10.4436	0.463515
10.4619	0.419279
10.4803	0.465438
10.4986	0.413509
10.5169	0.405816
10.5353	0.465438
10.5536	0.442359
10.5719	0.450052
10.5903	0.448129
10.6086	0.507751
10.627	0.490441
10.6453	0.442359
10.6636	0.444282
10.682	0.401969
10.7003	0.436589
10.7186	0.405816
10.737	0.469285
10.7553	0.398123
10.7736	0.430819
10.792	0.426972
10.8103	0.400046
10.8287	0.461592
10.847	0.453899
10.8653	0.450052
10.8837	0.401969
10.902	0.413509
10.9203	0.432742
10.9387	0.386583
10.957	0.436589
10.9754	0.428896
10.9937	0.421202
11.012	0.423126
11.0304	0.457745
11.0487	0.421202
11.067	0.394276
11.0854	0.430819
11.1037	0.421202
11.1221	0.448129
11.1404	0.444282
11.1587	0.432742
11.1771	0.398123
11.1954	0.376967
11.2137	0.407739
11.2321	0.457745
11.2504	0.419279
11.2687	0.438512
11.2871	0.401969
11.3054	0.403893
11.3238	0.448129
11.3421	0.394276
11.3604	0.38466
11.3788	0.400046
11.3971	0.376967
11.4154	0.475055
11.4338	0.388506
11.4521	0.407739
11.4705	0.388506
11.4888	0.386583
11.5071	0.413509
11.5255	0.436589
11.5438	0.407739
11.5621	0.35581
11.5805	0.440435
11.5988	0.403893
11.6171	0.37312
11.6355	0.409663
11.6538	0.421202
11.6722	0.438512
11.6905	0.428896
11.7088	0.411586
11.7272	0.39043
11.7455	0.415433
11.7638	0.38466
11.7822	0.407739
11.8005	0.3962
11.8189	0.398123
11.8372	0.359657
11.8555	0.380813
11.8739	0.35581
11.8922	0.3962
11.9105	0.392353
11.9289	0.413509
11.9472	0.415433
11.9655	0.444282
11.9839	0.365427
12.0022	0.434666
12.0206	0.386583
12.0389	0.386583
12.0572	0.405816
12.0756	0.463515
12.0939	0.436589
12.1122	0.411586
12.1306	0.39043
12.1489	0.421202
12.1673	0.411586
12.1856	0.411586
12.2039	0.444282
12.2223	0.450052
12.2406	0.426972
12.2589	0.425049
12.2773	0.425049
12.2956	0.450052
12.3139	0.471208
12.3323	0.440435
12.3506	0.403893
12.369	0.446205
12.3873	0.475055
12.4056	0.444282
12.424	0.398123
12.4423	0.476978
12.4606	0.521214
12.479	0.54237
12.4973	0.494288
12.5157	0.523137
12.534	0.54237
12.5523	0.588529
12.5707	0.661615
12.589	0.58276
12.6073	0.634689
12.6257	0.702004
12.644	0.813555
12.6624	0.861638
12.6807	0.892411
12.699	0.978959
12.7174	1.1886
12.7357	1.29053
12.754	1.5848
12.7724	1.74828
12.7907	1.98292
12.809	2.2618
12.8274	2.53491
12.8457	2.73685
12.8641	2.66377
12.8824	2.35219
12.9007	1.91561
12.9191	1.39631
12.9374	1.13859
12.9557	0.815479
12.9741	0.688541
12.9924	0.573143
13.0108	0.54237
13.0291	0.498134
13.0474	0.513521
13.0658	0.457745
13.0841	0.400046
13.1024	0.413509
13.1208	0.382736
13.1391	0.421202
13.1574	0.3962
13.1758	0.357734
13.1941	0.363503
13.2125	0.35581
13.2308	0.382736
13.2491	0.348117
13.2675	0.423126
13.2858	0.363503
13.3041	0.453899
13.3225	0.37889
13.3408	0.380813
13.3592	0.357734
13.3775	0.319268
13.3958	0.417356
13.4142	0.371197
13.4325	0.386583
13.4508	0.326961
13.4692	0.326961
13.4875	0.365427
13.5058	0.400046
13.5242	0.34427
13.5425	0.346194
13.5609	0.37312
13.5792	0.359657
13.5975	0.375043
13.6159	0.357734
13.6342	0.319268
13.6525	0.346194
13.6709	0.353887
13.6892	0.369273
13.7076	0.351964
13.7259	0.35581
13.7442	0.334654
13.7626	0.409663
13.7809	0.371197
13.7992	0.296188
13.8176	0.34427
13.8359	0.348117
13.8542	0.313498
13.8726	0.342347
13.8909	0.388506
13.9093	0.388506
13.9276	0.38466
13.9459	0.35004
13.9643	0.330807
13.9826	0.365427
14.0009	0.338501
14.0193	0.319268
14.0376	0.365427
14.056	0.376967
14.0743	0.35581
14.0926	0.357734
14.111	0.321191
14.1293	0.353887
14.1476	0.380813
14.166	0.317344
14.1843	0.311574
14.2026	0.39043
14.221	0.36735
14.2393	0.39043
14.2577	0.371197
14.276	0.386583
14.2943	0.348117
14.3127	0.313498
14.331	0.382736
14.3493	0.394276
14.3677	0.359657
14.386	0.340424
14.4044	0.348117
14.4227	0.328884
14.441	0.351964
14.4594	0.417356
14.4777	0.382736
14.496	0.359657
14.5144	0.405816
14.5327	0.340424
14.5511	0.442359
14.5694	0.353887
14.5877	0.428896
14.6061	0.353887
14.6244	0.413509
14.6427	0.37312
14.6611	0.386583
14.6794	0.394276
14.6977	0.446205
14.7161	0.444282
14.7344	0.440435
14.7528	0.434666
14.7711	0.486595
14.7894	0.473132
14.8078	0.430819
14.8261	0.440435
14.8444	0.490441
14.8628	0.459668
14.8811	0.500058
14.8995	0.463515
14.9178	0.425049
14.9361	0.392353
14.9545	0.346194
14.9728	0.38466
14.9911	0.319268
15.0095	0.296188
15.0278	0.398123
15.0461	0.365427
15.0645	0.338501
15.0828	0.37889
15.1012	0.346194
15.1195	0.357734
15.1378	0.286572
15.1562	0.330807
15.1745	0.359657
15.1928	0.34427
15.2112	0.340424
15.2295	0.34427
15.2479	0.325038
15.2662	0.342347
15.2845	0.317344
15.3029	0.303881
15.3212	0.359657
15.3395	0.326961
15.3579	0.348117
15.3762	0.338501
15.3945	0.334654
15.4129	0.305805
15.4312	0.311574
15.4496	0.382736
15.4679	0.413509
15.4862	0.334654
15.5046	0.340424
15.5229	0.357734
15.5412	0.359657
15.5596	0.36158
15.5779	0.325038
15.5963	0.338501
15.6146	0.36735
15.6329	0.338501
15.6513	0.357734
15.6696	0.380813
15.6879	0.300035
15.7063	0.334654
15.7246	0.405816
15.7429	0.411586
15.7613	0.382736
15.7796	0.380813
15.798	0.411586
15.8163	0.432742
15.8346	0.434666
15.853	0.467362
15.8713	0.423126
15.8896	0.519291
15.908	0.494288
15.9263	0.484671
15.9447	0.567373
15.963	0.55391
15.9813	0.605839
15.9997	0.686618
16.018	0.638535
16.0363	0.678924
16.0547	0.730854
16.073	0.744317
16.0914	0.765473
16.1097	0.657768
16.128	0.648152
16.1464	0.598146
16.1647	0.53083
16.183	0.509674
16.2014	0.517367
16.2197	0.451975
16.238	0.469285
16.2564	0.469285
16.2747	0.498134
16.2931	0.419279
16.3114	0.386583
16.3297	0.380813
16.3481	0.35004
16.3664	0.36735
16.3847	0.375043
16.4031	0.417356
16.4214	0.35581
16.4398	0.382736
16.4581	0.357734
16.4764	0.328884
16.4948	0.351964
16.5131	0.36158
16.5314	0.407739
16.5498	0.363503
16.5681	0.305805
16.5864	0.357734
16.6048	0.317344
16.6231	0.323114
16.6415	0.382736
16.6598	0.348117
16.6781	0.301958
16.6965	0.300035
16.7148	0.359657
16.7331	0.313498
16.7515	0.365427
16.7698	0.334654
16.7882	0.37312
16.8065	0.346194
16.8248	0.338501
16.8432	0.359657
16.8615	0.315421
16.8798	0.340424
16.8982	0.346194
16.9165	0.348117
16.9348	0.301958
16.9532	0.301958
16.9715	0.357734
16.9899	0.37312
17.0082	0.394276
17.0265	0.353887
17.0449	0.369273
17.0632	0.386583
17.0815	0.298111
17.0999	0.353887
17.1182	0.342347
17.1366	0.315421
17.1549	0.325038
17.1732	0.39043
17.1916	0.38466
17.2099	0.311574
17.2282	0.365427
17.2466	0.290418
17.2649	0.376967
17.2832	0.38466
17.3016	0.415433
17.3199	0.359657
17.3383	0.428896
17.3566	0.407739
17.3749	0.394276
17.3933	0.407739
17.4116	0.400046
17.4299	0.471208
17.4483	0.3962
17.4666	0.453899
17.485	0.473132
17.5033	0.503904
17.5216	0.480825
17.54	0.469285
17.5583	0.573143
17.5766	0.513521
17.595	0.540447
17.6133	0.634689
17.6316	0.702004
17.65	0.640459
17.6683	0.626995
17.6867	0.750087
17.705	0.748163
17.7233	0.727007
17.7417	0.773166
17.76	0.696234
17.7783	0.650075
17.7967	0.626995
17.815	0.617379
17.8334	0.557757
17.8517	0.563527
17.87	0.507751
17.8884	0.478901
17.9067	0.440435
17.925	0.457745
17.9434	0.469285
17.9617	0.430819
17.9801	0.446205
17.9984	0.442359
18.0167	0.36735
18.0351	0.436589
18.0534	0.369273
18.0717	0.409663
18.0901	0.482748
18.1084	0.37312
18.1267	0.394276
18.1451	0.425049
18.1634	0.413509
18.1818	0.469285
18.2001	0.478901
18.2184	0.473132
18.2368	0.436589
18.2551	0.430819
18.2734	0.38466
18.2918	0.442359
18.3101	0.451975
18.3285	0.425049
18.3468	0.417356
18.3651	0.426972
18.3835	0.459668
18.4018	0.407739
18.4201	0.436589
18.4385	0.423126
18.4568	0.3962
18.4751	0.3962
18.4935	0.386583
18.5118	0.442359
18.5302	0.36735
18.5485	0.405816
18.5668	0.38466
18.5852	0.415433
18.6035	0.421202
18.6218	0.386583
18.6402	0.426972
18.6585	0.426972
18.6769	0.425049
18.6952	0.407739
18.7135	0.425049
18.7319	0.392353
18.7502	0.371197
18.7685	0.426972
18.7869	0.434666
18.8052	0.419279
18.8235	0.455822
18.8419	0.421202
18.8602	0.465438
18.8786	0.496211
18.8969	0.457745
18.9152	0.436589
18.9336	0.421202
18.9519	0.446205
18.9702	0.480825
18.9886	0.394276
19.0069	0.438512
19.0253	0.482748
19.0436	0.467362
19.0619	0.457745
19.0803	0.453899
19.0986	0.509674
19.1169	0.440435
19.1353	0.505828
19.1536	0.498134
19.1719	0.626995
19.1903	0.54237
19.2086	0.550063
19.227	0.551987
19.2453	0.615456
19.2636	0.715467
19.282	0.634689
19.3003	0.719314
19.3186	0.759703
19.337	0.653922
19.3553	0.830865
19.3737	0.790476
19.392	0.823172
19.4103	0.907797
19.4287	1.03666
19.447	1.02319
19.4653	1.23091
19.4837	1.35785
19.502	1.54441
19.5204	1.89253
19.5387	2.18102
19.557	2.61376
19.5754	3.19652
19.5937	3.84467
19.612	4.73709
19.6304	5.82567
19.6487	6.99888
19.667	7.96246
19.6854	9.17414
19.7037	9.22029
19.7221	8.77601
19.7404	7.6605
19.7587	6.41036
19.7771	5.1429
19.7954	3.80429
19.8137	2.72916
19.8321	2.1791
19.8504	1.82713
19.8688	1.42132
19.8871	1.30977
19.9054	1.09243
19.9238	0.90972
19.9421	0.784706
19.9604	0.721237
19.9788	0.748163
19.9971	0.72316
20.0154	0.640459
20.0338	0.661615
20.0521	0.546217
20.0705	0.596223
20.0888	0.57699
20.1071	0.478901
20.1255	0.521214
20.1438	0.567373
20.1621	0.496211
20.1805	0.513521
20.1988	0.507751
20.2172	0.513521
20.2355	0.476978
20.2538	0.496211
20.2722	0.450052
20.2905	0.442359
20.3088	0.480825
20.3272	0.423126
20.3455	0.455822
20.3638	0.498134
20.3822	0.498134
20.4005	0.459668
20.4189	0.455822
20.4372	0.467362
20.4555	0.467362
20.4739	0.425049
20.4922	0.498134
20.5105	0.486595
20.5289	0.500058
20.5472	0.463515
20.5656	0.434666
20.5839	0.507751
20.6022	0.480825
20.6206	0.500058
20.6389	0.436589
20.6572	0.459668
20.6756	0.423126
20.6939	0.478901
20.7122	0.503904
20.7306	0.494288
20.7489	0.488518
20.7673	0.501981
20.7856	0.440435
20.8039	0.496211
20.8223	0.430819
20.8406	0.453899
20.8589	0.486595
20.8773	0.432742
20.8956	0.469285
20.914	0.496211
20.9323	0.53083
20.9506	0.519291
20.969	0.5366
20.9873	0.555833
21.0056	0.601993
21.024	0.630842
21.0423	0.584683
21.0607	0.592376
21.079	0.586606
21.0973	0.634689
21.1157	0.55968
21.134	0.573143
21.1523	0.619302
21.1707	0.611609
21.189	0.55968
21.2073	0.544294
21.2257	0.551987
21.244	0.528907
21.2624	0.500058
21.2807	0.498134
21.299	0.476978
21.3174	0.550063
21.3357	0.492365
21.354	0.486595
21.3724	0.532754
21.3907	0.500058
21.4091	0.496211
21.4274	0.484671
21.4457	0.526984
21.4641	0.519291
21.4824	0.5366
21.5007	0.551987
21.5191	0.592376
21.5374	0.605839
21.5557	0.648152
21.5741	0.57122
21.5924	0.669308
21.6108	0.696234
21.6291	0.684694
21.6474	0.780859
21.6658	0.775089
21.6841	0.877024
21.7024	0.878948
21.7208	1.01935
21.7391	1.23283
21.7575	1.11359
21.7758	1.33862
21.7941	1.45786
21.8125	1.60018
21.8308	1.90984
21.8491	2.04831
21.8675	2.40797
21.8858	2.69454
21.9041	2.96765
21.9225	3.24076
21.9408	3.40809
21.9592	3.37347
21.9775	3.27538
21.9958	3.20229
22.0142	2.9965
22.0325	2.51375
22.0508	2.32142
22.0692	1.94638
22.0875	1.82906
22.1059	1.58864
22.1242	1.46171
22.1425	1.31938
22.1609	1.13859
22.1792	1.12513
22.1975	1.06358
22.2159	1.04627
22.2342	1.12513
22.2525	1.1059
22.2709	1.18283
22.2892	1.21937
22.3076	1.4367
22.3259	1.52325
22.3442	1.57134
22.3626	1.77713
22.3809	1.78867
22.3992	1.75213
22.4176	1.57326
22.4359	1.39247
22.4543	1.25591
22.4726	1.00973
22.4909	0.963573
22.5093	0.900104
22.5276	0.782783
22.5459	0.711621
22.5643	0.609686
22.5826	0.601993
22.6009	0.636612
22.6193	0.575066
22.6376	0.519291
22.656	0.555833
22.6743	0.538524
22.6926	0.526984
22.711	0.505828
22.7293	0.478901
22.7476	0.484671
22.766	0.467362
22.7843	0.434666
22.8027	0.465438
22.821	0.442359
22.8393	0.428896
22.8577	0.440435
22.876	0.426972
22.8943	0.434666
22.9127	0.419279
22.931	0.403893
22.9494	0.3962
22.9677	0.471208
22.986	0.438512
23.0044	0.380813
23.0227	0.36735
23.041	0.37889
23.0594	0.434666
23.0777	0.411586
23.096	0.415433
23.1144	0.401969
23.1327	0.39043
23.1511	0.425049
23.1694	0.432742
23.1877	0.394276
23.2061	0.415433
23.2244	0.480825
23.2427	0.398123
23.2611	0.430819
23.2794	0.436589
23.2978	0.423126
23.3161	0.375043
23.3344	0.35581
23.3528	0.421202
23.3711	0.419279
23.3894	0.446205
23.4078	0.425049
23.4261	0.428896
23.4444	0.428896
23.4628	0.450052
23.4811	0.436589
23.4995	0.451975
23.5178	0.461592
23.5361	0.484671
23.5545	0.492365
23.5728	0.526984
23.5911	0.465438
23.6095	0.473132
23.6278	0.505828
23.6462	0.438512
23.6645	0.453899
23.6828	0.486595
23.7012	0.440435
23.7195	0.428896
23.7378	0.415433
23.7562	0.411586
23.7745	0.425049
23.7928	0.419279
23.8112	0.369273
23.8295	0.413509
23.8479	0.37312
23.8662	0.357734
23.8845	0.36735
23.9029	0.421202
23.9212	0.376967
23.9395	0.359657
23.9579	0.382736
23.9762	0.423126
23.9946	0.446205
24.0129	0.400046
24.0312	0.446205
24.0496	0.482748
24.0679	0.490441
24.0862	0.538524
24.1046	0.446205
24.1229	0.573143
24.1412	0.515444
24.1596	0.540447
24.1779	0.634689
24.1963	0.663538
24.2146	0.682771
24.2329	0.753933
24.2513	0.832788
24.2696	0.92703
24.2879	1.01358
24.3063	1.05781
24.3246	1.08282
24.343	1.26361
24.3613	1.36747
24.3796	1.4117
24.398	1.39247
24.4163	1.40785
24.4346	1.38862
24.453	1.26553
24.4713	1.15783
24.4897	1.06166
24.508	0.934723
24.5263	0.848175
24.5447	0.765473
24.563	0.700081
24.5813	0.675078
24.5997	0.648152
24.618	0.619302
24.6363	0.600069
24.6547	0.557757
24.673	0.538524
24.6914	0.573143
24.7097	0.578913
24.728	0.56545
24.7464	0.605839
24.7647	0.603916
24.783	0.563527
24.8014	0.592376
24.8197	0.575066
24.8381	0.555833
24.8564	0.528907
24.8747	0.54237
24.8931	0.488518
24.9114	0.451975
24.9297	0.453899
24.9481	0.401969
24.9664	0.438512
24.9847	0.467362
25.0031	0.419279
25.0214	0.369273
25.0398	0.351964
25.0581	0.39043
25.0764	0.382736
25.0948	0.342347
25.1131	0.323114
25.1314	0.323114
25.1498	0.357734
25.1681	0.376967
25.1865	0.321191
25.2048	0.286572
25.2231	0.336577
25.2415	0.340424
25.2598	0.319268
25.2781	0.363503
25.2965	0.340424
25.3148	0.317344
25.3331	0.305805
25.3515	0.311574
25.3698	0.330807
25.3882	0.328884
25.4065	0.315421
25.4248	0.325038
25.4432	0.315421
25.4615	0.294265
25.4798	0.357734
25.4982	0.353887
25.5165	0.365427
25.5349	0.346194
25.5532	0.319268
25.5715	0.338501
25.5899	0.288495
25.6082	0.319268
25.6265	0.325038
25.6449	0.288495
25.6632	0.369273
25.6815	0.394276
25.6999	0.336577
25.7182	0.353887
25.7366	0.348117
25.7549	0.39043
25.7732	0.375043
25.7916	0.423126
25.8099	0.421202
25.8282	0.490441
25.8466	0.442359
25.8649	0.513521
25.8833	0.446205
25.9016	0.475055
25.9199	0.509674
25.9383	0.446205
25.9566	0.423126
25.9749	0.434666
25.9933	0.363503
26.0116	0.382736
26.0299	0.37889
26.0483	0.365427
26.0666	0.323114
26.085	0.36735
26.1033	0.348117
26.1216	0.336577
26.14	0.340424
26.1583	0.330807
26.1766	0.319268
26.195	0.313498
26.2133	0.301958
26.2317	0.292341
26.25	0.315421
26.2683	0.286572
26.2867	0.286572
26.305	0.301958
26.3233	0.294265
26.3417	0.286572
26.36	0.280802
26.3784	0.311574
26.3967	0.301958
26.415	0.300035
26.4334	0.301958
26.4517	0.309651
26.47	0.292341
26.4884	0.294265
26.5067	0.269262
26.525	0.303881
26.5434	0.282725
26.5617	0.34427
26.5801	0.284648
26.5984	0.330807
26.6167	0.323114
26.6351	0.305805
26.6534	0.332731
26.6717	0.317344
26.6901	0.305805
26.7084	0.301958
26.7268	0.288495
26.7451	0.36158
26.7634	0.403893
26.7818	0.37312
26.8001	0.348117
26.8184	0.38466
26.8368	0.403893
26.8551	0.3962
26.8734	0.423126
26.8918	0.451975
26.9101	0.444282
26.9285	0.496211
26.9468	0.503904
26.9651	0.500058
26.9835	0.467362
27.0018	0.471208
27.0201	0.436589
27.0385	0.450052
27.0568	0.478901
27.0752	0.363503
27.0935	0.380813
27.1118	0.37889
27.1302	0.37312
27.1485	0.357734
27.1668	0.403893
27.1852	0.35581
27.2035	0.332731
27.2218	0.328884
27.2402	0.363503
27.2585	0.351964
27.2769	0.38466
27.2952	0.340424
27.3135	0.348117
27.3319	0.37312
27.3502	0.351964
27.3685	0.407739
27.3869	0.400046
27.4052	0.417356
27.4236	0.434666
27.4419	0.423126
27.4602	0.476978
27.4786	0.463515
27.4969	0.56545
27.5152	0.613532
27.5336	0.648152
27.5519	0.727007
27.5702	0.755856
27.5886	0.888564
27.6069	0.846251
27.6253	0.990499
27.6436	1.02896
27.6619	1.03089
27.6803	1.0982
27.6986	1.1059
27.7169	0.971266
27.7353	0.894334
27.7536	0.861638
27.772	0.817402
27.7903	0.736623
27.8086	0.619302
27.827	0.632765
27.8453	0.578913
27.8636	0.588529
27.882	0.488518
27.9003	0.432742
27.9187	0.475055
27.937	0.403893
27.9553	0.425049
27.9737	0.388506
27.992	0.421202
28.0103	0.392353
28.0287	0.386583
28.047	0.400046
28.0653	0.392353
28.0837	0.35581
28.102	0.342347
28.1204	0.336577
28.1387	0.332731
28.157	0.321191
28.1754	0.351964
28.1937	0.363503
28.212	0.359657
28.2304	0.288495
28.2487	0.309651
28.2671	0.382736
28.2854	0.35581
28.3037	0.3962
28.3221	0.336577
28.3404	0.369273
28.3587	0.325038
28.3771	0.380813
28.3954	0.405816
28.4137	0.359657
28.4321	0.455822
28.4504	0.430819
28.4688	0.476978
28.4871	0.463515
28.5054	0.517367
28.5238	0.511597
28.5421	0.598146
28.5604	0.651998
28.5788	0.696234
28.5971	0.798169
28.6155	0.969343
28.6338	0.923183
28.6521	1.11744
28.6705	1.09628
28.6888	1.15783
28.7071	1.12321
28.7255	1.01358
28.7438	1.11744
28.7621	0.959726
28.7805	0.892411
28.7988	0.759703
28.8172	0.694311
28.8355	0.615456
28.8538	0.55968
28.8722	0.494288
28.8905	0.448129
28.9088	0.446205
28.9272	0.363503
28.9455	0.326961
28.9639	0.328884
28.9822	0.342347
29.0005	0.375043
29.0189	0.351964
29.0372	0.296188
29.0555	0.278878
29.0739	0.278878
29.0922	0.321191
29.1105	0.288495
29.1289	0.278878
29.1472	0.332731
29.1656	0.273108
29.1839	0.280802
29.2022	0.317344
29.2206	0.263492
29.2389	0.251952
29.2572	0.278878
29.2756	0.286572
29.2939	0.255799
29.3123	0.265415
29.3306	0.248106
29.3489	0.276955
29.3673	0.244259
29.3856	0.265415
29.4039	0.240412
29.4223	0.230796
29.4406	0.261569
29.459	0.248106
29.4773	0.248106
29.4956	0.278878
29.514	0.250029
29.5323	0.276955
29.5506	0.296188
29.569	0.315421
29.5873	0.267339
29.6056	0.273108
29.624	0.251952
29.6423	0.296188
29.6607	0.257722
29.679	0.292341
29.6973	0.276955
29.7157	0.294265
29.734	0.288495
29.7523	0.273108
29.7707	0.286572
29.789	0.276955
29.8074	0.273108
29.8257	0.217333
29.844	0.276955
29.8624	0.319268
29.8807	0.267339
29.899	0.288495
29.9174	0.263492
29.9357	0.236566
29.954	0.300035
29.9724	0.242336
29.9907	0.250029
30.0091	0.265415
30.0274	0.298111
30.0457	0.278878
30.0641	0.221179
30.0824	0.271185
30.1007	0.248106
30.1191	0.269262
30.1374	0.276955
30.1558	0.226949
30.1741	0.232719
30.1924	0.253875
30.2108	0.232719
30.2291	0.223103
30.2474	0.251952
30.2658	0.194253
30.2841	0.225026
30.3024	0.232719
30.3208	0.240412
30.3391	0.219256
30.3575	0.244259
30.3758	0.230796
30.3941	0.190407
30.4125	0.225026
30.4308	0.184637
30.4491	0.232719
30.4675	0.211563
30.4858	0.213486
30.5042	0.225026
30.5225	0.215409
30.5408	0.226949
30.5592	0.16348
30.5775	0.226949
30.5958	0.150017
30.6142	0.211563
30.6325	0.217333
30.6508	0.251952
30.6692	0.230796
30.6875	0.182713
30.7059	0.232719
30.7242	0.228873
30.7425	0.20964
30.7609	0.240412
30.7792	0.221179
30.7975	0.18656
30.8159	0.226949
30.8342	0.261569
30.8526	0.240412
30.8709	0.238489
30.8892	0.228873
30.9076	0.234642
30.9259	0.219256
30.9442	0.236566
30.9626	0.238489
30.9809	0.201946
30.9992	0.223103
31.0176	0.263492
31.0359	0.228873
31.0543	0.259645
31.0726	0.226949
31.0909	0.234642
31.1093	0.200023
31.1276	0.207716
31.1459	0.244259
31.1643	0.228873
31.1826	0.242336
31.201	0.226949
31.2193	0.178867
31.2376	0.217333
31.256	0.217333
31.2743	0.288495
31.2926	0.273108
31.311	0.271185
31.3293	0.255799
31.3477	0.280802
31.366	0.255799
31.3843	0.275032
31.4027	0.259645
31.421	0.257722
31.4393	0.330807
31.4577	0.380813
31.476	0.342347
31.4943	0.375043
31.5127	0.403893
31.531	0.348117
31.5494	0.492365
31.5677	0.398123
31.586	0.405816
31.6044	0.413509
31.6227	0.440435
31.641	0.342347
31.6594	0.348117
31.6777	0.315421
31.6961	0.294265
31.7144	0.284648
31.7327	0.326961
31.7511	0.298111
31.7694	0.292341
31.7877	0.303881
31.8061	0.273108
31.8244	0.35004
31.8427	0.296188
31.8611	0.292341
31.8794	0.276955
31.8978	0.342347
31.9161	0.328884
31.9344	0.269262
31.9528	0.288495
31.9711	0.259645
31.9894	0.223103
32.0078	0.273108
32.0261	0.257722
32.0445	0.242336
32.0628	0.20964
32.0811	0.213486
32.0995	0.225026
32.1178	0.226949
32.1361	0.18079
32.1545	0.20387
32.1728	0.226949
32.1911	0.223103
32.2095	0.259645
32.2278	0.213486
32.2462	0.217333
32.2645	0.205793
32.2828	0.207716
32.3012	0.242336
32.3195	0.17502
32.3378	0.19233
32.3562	0.217333
32.3745	0.217333
32.3929	0.217333
32.4112	0.221179
32.4295	0.248106
32.4479	0.226949
32.4662	0.265415
32.4845	0.228873
32.5029	0.213486
32.5212	0.221179
32.5395	0.219256
32.5579	0.236566
32.5762	0.196176
32.5946	0.226949
32.6129	0.255799
32.6312	0.219256
32.6496	0.246182
32.6679	0.267339
32.6862	0.250029
32.7046	0.313498
32.7229	0.265415
32.7413	0.328884
32.7596	0.307728
32.7779	0.286572
32.7963	0.282725
32.8146	0.340424
32.8329	0.257722
32.8513	0.269262
32.8696	0.253875
32.888	0.234642
32.9063	0.269262
32.9246	0.238489
32.943	0.223103
32.9613	0.17502
32.9796	0.20964
32.998	0.20387
33.0163	0.221179
33.0346	0.211563
33.053	0.194253
33.0713	0.248106
33.0897	0.217333
33.108	0.217333
33.1263	0.213486
33.1447	0.200023
33.163	0.207716
33.1813	0.19233
33.1997	0.221179
33.218	0.196176
33.2364	0.213486
33.2547	0.18656
33.273	0.19233
33.2914	0.1981
33.3097	0.20964
33.328	0.242336
33.3464	0.211563
33.3647	0.211563
33.383	0.255799
33.4014	0.207716
33.4197	0.225026
33.4381	0.219256
33.4564	0.19233
33.4747	0.188483
33.4931	0.196176
33.5114	0.196176
33.5297	0.20387
33.5481	0.201946
33.5664	0.20964
33.5848	0.230796
33.6031	0.196176
33.6214	0.178867
33.6398	0.219256
33.6581	0.1981
33.6764	0.194253
33.6948	0.190407
33.7131	0.230796
33.7314	0.1981
33.7498	0.219256
33.7681	0.201946
33.7865	0.205793
33.8048	0.223103
33.8231	0.225026
33.8415	0.242336
33.8598	0.215409
33.8781	0.225026
33.8965	0.225026
33.9148	0.275032
33.9332	0.240412
33.9515	0.315421
33.9698	0.257722
33.9882	0.313498
34.0065	0.323114
34.0248	0.288495
34.0432	0.342347
34.0615	0.375043
34.0798	0.411586
34.0982	0.413509
34.1165	0.478901
34.1349	0.544294
34.1532	0.557757
34.1715	0.611609
34.1899	0.671231
34.2082	0.632765
34.2265	0.642382
34.2449	0.667385
34.2632	0.598146
34.2816	0.561603
34.2999	0.534677
34.3182	0.465438
34.3366	0.425049
34.3549	0.400046
34.3732	0.36735
34.3916	0.330807
34.4099	0.353887
34.4282	0.296188
34.4466	0.292341
34.4649	0.242336
34.4833	0.276955
34.5016	0.278878
34.5199	0.267339
34.5383	0.240412
34.5566	0.250029
34.5749	0.219256
34.5933	0.230796
34.6116	0.251952
34.63	0.234642
34.6483	0.232719
34.6666	0.230796
34.685	0.238489
34.7033	0.200023
34.7216	0.232719
34.74	0.230796
34.7583	0.190407
34.7767	0.238489
34.795	0.211563
34.8133	0.223103
34.8317	0.171174
34.85	0.215409
34.8683	0.201946
34.8867	0.207716
34.905	0.155787
34.9233	0.211563
34.9417	0.201946
34.96	0.190407
34.9784	0.225026
34.9967	0.213486
35.015	0.201946
35.0334	0.18656
35.0517	0.18656
35.07	0.161557
35.0884	0.225026
35.1067	0.190407
35.1251	0.19233
35.1434	0.221179
35.1617	0.200023
35.1801	0.201946
35.1984	0.194253
35.2167	0.18079
35.2351	0.182713
35.2534	0.20387
35.2717	0.20387
35.2901	0.19233
35.3084	0.213486
35.3268	0.196176
35.3451	0.167327
35.3634	0.194253
35.3818	0.271185
35.4001	0.226949
35.4184	0.184637
35.4368	0.219256
35.4551	0.201946
35.4735	0.20387
35.4918	0.18079
35.5101	0.188483
35.5285	0.201946
35.5468	0.248106
35.5651	0.225026
35.5835	0.225026
35.6018	0.240412
35.6201	0.215409
35.6385	0.242336
35.6568	0.253875
35.6752	0.261569
35.6935	0.217333
35.7118	0.265415
35.7302	0.288495
35.7485	0.300035
35.7668	0.330807
35.7852	0.35581
35.8035	0.371197
35.8219	0.3962
35.8402	0.380813
35.8585	0.451975
35.8769	0.528907
35.8952	0.465438
35.9135	0.476978
35.9319	0.478901
35.9502	0.444282
35.9685	0.394276
35.9869	0.38466
36.0052	0.37889
36.0236	0.392353
36.0419	0.330807
36.0602	0.300035
36.0786	0.284648
36.0969	0.311574
36.1152	0.251952
36.1336	0.251952
36.1519	0.257722
36.1703	0.238489
36.1886	0.263492
36.2069	0.255799
36.2253	0.263492
36.2436	0.232719
36.2619	0.234642
36.2803	0.259645
36.2986	0.215409
36.317	0.255799
36.3353	0.230796
36.3536	0.20387
36.372	0.19233
36.3903	0.205793
36.4086	0.211563
36.427	0.246182
36.4453	0.176943
36.4636	0.211563
36.482	0.213486
36.5003	0.215409
36.5187	0.1981
36.537	0.1981
36.5553	0.18079
36.5737	0.194253
36.592	0.178867
36.6103	0.232719
36.6287	0.194253
36.647	0.205793
36.6654	0.215409
36.6837	0.200023
36.702	0.18656
36.7204	0.1981
36.7387	0.213486
36.757	0.176943
36.7754	0.232719
36.7937	0.190407
36.812	0.20964
36.8304	0.1981
36.8487	0.205793
36.8671	0.219256
36.8854	0.257722
36.9037	0.217333
36.9221	0.205793
36.9404	0.232719
36.9587	0.201946
36.9771	0.250029
36.9954	0.213486
37.0138	0.228873
37.0321	0.223103
37.0504	0.188483
37.0688	0.228873
37.0871	0.221179
37.1054	0.190407
37.1238	0.159634
37.1421	0.18079
37.1604	0.201946
37.1788	0.16925
37.1971	0.184637
37.2155	0.19233
37.2338	0.171174
37.2521	0.1981
37.2705	0.194253
37.2888	0.18656
37.3071	0.167327
37.3255	0.178867
37.3438	0.20387
37.3622	0.190407
37.3805	0.161557
37.3988	0.194253
37.4172	0.150017
37.4355	0.161557
37.4538	0.196176
37.4722	0.142324
37.4905	0.151941
37.5088	0.188483
37.5272	0.142324
37.5455	0.157711
37.5639	0.188483
37.5822	0.16348
37.6005	0.20387
37.6189	0.17502
37.6372	0.194253
37.6555	0.20387
37.6739	0.215409
37.6922	0.151941
37.7106	0.205793
37.7289	0.184637
37.7472	0.188483
37.7656	0.18079
37.7839	0.205793
37.8022	0.178867
37.8206	0.165404
37.8389	0.190407
37.8573	0.182713
37.8756	0.20387
37.8939	0.138478
37.9123	0.18079
37.9306	0.18656
37.9489	0.234642
37.9673	0.167327
37.9856	0.176943
38.0039	0.17502
38.0223	0.201946
38.0406	0.20387
38.059	0.182713
38.0773	0.184637
38.0956	0.173097
38.114	0.217333
38.1323	0.17502
38.1506	0.157711
38.169	0.196176
38.1873	0.165404
38.2057	0.17502
38.224	0.18079
38.2423	0.150017
38.2607	0.18079
38.279	0.201946
38.2973	0.155787
38.3157	0.153864
38.334	0.171174
38.3523	0.167327
38.3707	0.176943
38.389	0.17502
38.4074	0.205793
38.4257	0.19233
38.444	0.16925
38.4624	0.176943
38.4807	0.178867
38.499	0.176943
38.5174	0.161557
38.5357	0.182713
38.5541	0.176943
38.5724	0.184637
38.5907	0.20387
38.6091	0.17502
38.6274	0.173097
38.6457	0.16925
38.6641	0.176943
38.6824	0.201946
38.7007	0.16925
38.7191	0.171174
38.7374	0.201946
38.7558	0.200023
38.7741	0.184637
38.7924	0.178867
38.8108	0.1981
38.8291	0.205793
38.8474	0.155787
38.8658	0.16348
38.8841	0.184637
38.9025	0.18079
38.9208	0.194253
38.9391	0.188483
38.9575	0.184637
38.9758	0.178867
38.9941	0.148094
39.0125	0.201946
39.0308	0.221179
39.0491	0.226949
39.0675	0.200023
39.0858	0.188483
39.1042	0.173097
39.1225	0.200023
39.1408	0.194253
39.1592	0.232719
39.1775	0.201946
39.1958	0.223103
39.2142	0.232719
39.2325	0.261569
39.2509	0.242336
39.2692	0.211563
39.2875	0.240412
39.3059	0.265415
39.3242	0.280802
39.3425	0.280802
39.3609	0.236566
39.3792	0.280802
39.3975	0.205793
39.4159	0.213486
39.4342	0.20964
39.4526	0.242336
39.4709	0.219256
39.4892	0.217333
39.5076	0.200023
39.5259	0.255799
39.5442	0.176943
39.5626	0.188483
39.5809	0.165404
39.5993	0.20964
39.6176	0.225026
39.6359	0.150017
39.6543	0.211563
39.6726	0.194253
39.6909	0.20964
39.7093	0.16925
39.7276	0.20387
39.746	0.165404
39.7643	0.236566
39.7826	0.221179
39.801	0.234642
39.8193	0.263492
39.8376	0.217333
39.856	0.230796
39.8743	0.221179
39.8926	0.232719
39.911	0.238489
39.9293	0.267339
39.9477	0.261569
39.966	0.290418
39.9843	0.278878
40.0027	0.36735
40.021	0.332731
40.0393	0.375043
40.0577	0.315421
40.076	0.35581
40.0944	0.328884
40.1127	0.328884
40.131	0.290418
40.1494	0.278878
40.1677	0.248106
40.186	0.251952
40.2044	0.223103
40.2227	0.250029
40.241	0.221179
40.2594	0.250029
40.2777	0.230796
40.2961	0.188483
40.3144	0.207716
40.3327	0.20387
40.3511	0.240412
40.3694	0.234642
40.3877	0.211563
40.4061	0.248106
40.4244	0.215409
40.4428	0.215409
40.4611	0.246182
40.4794	0.265415
40.4978	0.205793
40.5161	0.20964
40.5344	0.273108
[truncated: 1,056 more rows]

## Sheet: Heating 75 °C
2theta	Intensity
3.89731	1.40978
3.91565	1.36939
3.93399	1.37131
3.95232	1.43863
3.97066	1.42132
3.989	1.37131
4.00733	1.48479
4.02567	1.46555
4.04401	1.46363
4.06234	1.42516
4.08068	1.40593
4.09902	1.34246
4.11735	1.47902
4.13569	1.30207
4.15403	1.42132
4.17237	1.39055
4.1907	1.36362
4.20904	1.35593
4.22738	1.34439
4.24571	1.37708
4.26405	1.41555
4.28239	1.27899
4.30072	1.25784
4.31906	1.28476
4.3374	1.35593
4.35573	1.33092
4.37407	1.2386
4.39241	1.29053
4.41075	1.30207
4.42908	1.25976
4.44742	1.29438
4.46576	1.22129
4.48409	1.31746
4.50243	1.39055
4.52077	1.35208
4.5391	1.25399
4.55744	1.29246
4.57578	1.27322
4.59411	1.31554
4.61245	1.31746
4.63079	1.24437
4.64912	1.18668
4.66746	1.25399
4.6858	1.27707
4.70414	1.23668
4.72247	1.2463
4.74081	1.20783
4.75915	1.10013
4.77748	1.24053
4.79582	1.16937
4.81416	1.20014
4.83249	1.22706
4.85083	1.21745
4.86917	1.13859
4.8875	1.19822
4.90584	1.19437
4.92418	1.19437
4.94252	1.18091
4.96085	1.18668
4.97919	1.17129
4.99753	1.15398
5.01586	1.16744
5.0342	1.19052
5.05254	1.14052
5.07087	1.1559
5.08921	1.26938
5.10755	1.14436
5.12588	1.05397
5.14422	1.14244
5.16256	1.20399
5.18089	1.0982
5.19923	1.10782
5.21757	1.07705
5.23591	1.13282
5.25424	1.18091
5.27258	1.11167
5.29092	1.16552
5.30925	1.10013
5.32759	1.14629
5.34593	1.16937
5.36426	1.24437
5.3826	1.11167
5.40094	1.13475
5.41927	1.05781
5.43761	1.10782
5.45595	1.10974
5.47429	1.0732
5.49262	1.09243
5.51096	1.18283
5.5293	1.05012
5.54763	1.0405
5.56597	1.08666
5.58431	1.06935
5.60264	1.12321
5.62098	1.09436
5.63932	1.09628
5.65765	1.05204
5.67599	1.12128
5.69433	1.1059
5.71266	1.12898
5.731	1.11167
5.74934	1.15975
5.76768	1.0982
5.78601	1.14244
5.80435	1.11936
5.82269	1.08859
5.84102	1.11936
5.85936	1.06743
5.8777	1.08282
5.89603	1.19052
5.91437	1.13282
5.93271	1.12705
5.95104	1.25976
5.96938	1.16167
5.98772	1.18475
6.00606	1.15398
6.02439	1.14629
6.04273	1.24822
6.06107	1.21552
6.0794	1.2713
6.09774	1.354
6.11608	1.36747
6.13441	1.3617
6.15275	1.33862
6.17109	1.38093
6.18942	1.47132
6.20776	1.42709
6.2261	1.47709
6.24444	1.47517
6.26277	1.58672
6.28111	1.67327
6.29945	1.71751
6.31778	1.70597
6.33612	1.68481
6.35446	1.76943
6.37279	1.7752
6.39113	1.82906
6.40947	1.90791
6.4278	1.87329
6.44614	2.10024
6.46448	2.21179
6.48281	2.18871
6.50115	2.43297
6.51949	2.40028
6.53783	2.50221
6.55616	2.62915
6.5745	2.89456
6.59284	3.05035
6.61117	3.19845
6.62951	3.29076
6.64785	3.54656
6.66618	3.71389
6.68452	4.02354
6.70286	4.26972
6.72119	4.50821
6.73953	4.75247
6.75787	5.07366
6.77621	5.44294
6.79454	5.71989
6.81288	6.02762
6.83122	6.46228
6.84955	7.28738
6.86789	7.68166
6.88623	8.3952
6.90456	8.9645
6.9229	9.94153
6.94124	10.632
6.95957	11.786
6.97791	12.7515
6.99625	13.8381
7.01458	15.1883
7.03292	16.7654
7.05126	18.3964
7.0696	19.5773
7.08793	21.9756
7.10627	24.6817
7.12461	26.1511
7.14294	29.2938
7.16128	32.3018
7.17962	35.2118
7.19795	39.1814
7.21629	43.9397
7.23463	49.6096
7.25296	55.4314
7.2713	63.9324
7.28964	73.5412
7.30798	84.6694
7.32631	97.5997
7.34465	113.169
7.36299	125.861
7.38132	138.739
7.39966	144.892
7.418	133.823
7.43633	111.619
7.45467	86.4042
7.47301	64.4517
7.49134	46.5361
7.50968	32.9153
7.52802	23.3662
7.54635	18.4348
7.56469	14.8613
7.58303	11.2994
7.60137	8.1721
7.6197	6.00454
7.63804	4.4986
7.65638	3.67927
7.67471	3.1696
7.69305	2.68877
7.71139	2.45605
7.72972	2.19256
7.74806	2.08293
7.7664	1.83675
7.78473	1.77136
7.80307	1.72905
7.82141	1.48286
7.83975	1.47517
7.85808	1.49056
7.87642	1.42132
7.89476	1.35977
7.91309	1.18283
7.93143	1.24822
7.94977	1.15783
7.9681	1.06743
7.98644	1.16937
8.00478	1.09051
8.02311	1.11551
8.04145	1.02127
8.05979	0.982806
8.07813	0.911644
8.09646	0.878948
8.1148	0.905874
8.13314	0.907797
8.15147	0.898181
8.16981	0.90395
8.18815	0.827018
8.20648	0.807786
8.22482	0.830865
8.24316	0.794322
8.26149	0.75201
8.27983	0.75778
8.29817	0.694311
8.3165	0.786629
8.33484	0.777013
8.35318	0.730854
8.37152	0.765473
8.38985	0.638535
8.40819	0.744317
8.42653	0.702004
8.44486	0.673155
8.4632	0.694311
8.48154	0.646228
8.49987	0.715467
8.51821	0.692388
8.53655	0.705851
8.55488	0.642382
8.57322	0.684694
8.59156	0.58276
8.6099	0.653922
8.62823	0.621226
8.64657	0.665461
8.66491	0.596223
8.68324	0.592376
8.70158	0.615456
8.71992	0.650075
8.73825	0.563527
8.75659	0.600069
8.77493	0.573143
8.79326	0.584683
8.8116	0.54814
8.82994	0.644305
8.84827	0.619302
8.86661	0.603916
8.88495	0.57699
8.90329	0.596223
8.92162	0.54237
8.93996	0.590453
8.9583	0.561603
8.97663	0.532754
8.99497	0.596223
9.01331	0.578913
9.03164	0.621226
9.04998	0.538524
9.06832	0.526984
9.08665	0.594299
9.10499	0.532754
9.12333	0.575066
9.14167	0.57122
9.16	0.580836
9.17834	0.496211
9.19668	0.540447
9.21501	0.494288
9.23335	0.561603
9.25169	0.550063
9.27002	0.555833
9.28836	0.490441
9.3067	0.557757
9.32503	0.534677
9.34337	0.513521
9.36171	0.534677
9.38004	0.580836
9.39838	0.501981
9.41672	0.550063
9.43506	0.498134
9.45339	0.501981
9.47173	0.511597
9.49007	0.507751
9.5084	0.442359
9.52674	0.488518
9.54508	0.484671
9.56341	0.496211
9.58175	0.515444
9.60009	0.546217
9.61842	0.54814
9.63676	0.53083
9.6551	0.480825
9.67344	0.486595
9.69177	0.513521
9.71011	0.56545
9.72845	0.540447
9.74678	0.54814
9.76512	0.513521
9.78346	0.494288
9.80179	0.430819
9.82013	0.490441
9.83847	0.457745
9.8568	0.448129
9.87514	0.465438
9.89348	0.511597
9.91181	0.496211
9.93015	0.436589
9.94849	0.461592
9.96683	0.451975
9.98516	0.463515
10.0035	0.486595
10.0218	0.436589
10.0402	0.467362
10.0585	0.486595
10.0768	0.444282
10.0952	0.455822
10.1135	0.376967
10.1319	0.457745
10.1502	0.455822
10.1685	0.446205
10.1869	0.417356
10.2052	0.413509
10.2235	0.438512
10.2419	0.426972
10.2602	0.442359
10.2786	0.486595
10.2969	0.494288
10.3152	0.463515
10.3336	0.392353
10.3519	0.425049
10.3702	0.478901
10.3886	0.3962
10.4069	0.403893
10.4252	0.438512
10.4436	0.401969
10.4619	0.494288
10.4803	0.461592
10.4986	0.442359
10.5169	0.478901
10.5353	0.457745
10.5536	0.417356
10.5719	0.442359
10.5903	0.411586
10.6086	0.428896
10.627	0.488518
10.6453	0.494288
10.6636	0.413509
10.682	0.442359
10.7003	0.426972
10.7186	0.448129
10.737	0.369273
10.7553	0.426972
10.7736	0.432742
10.792	0.455822
10.8103	0.415433
10.8287	0.444282
10.847	0.469285
10.8653	0.417356
10.8837	0.480825
10.902	0.38466
10.9203	0.436589
10.9387	0.409663
10.957	0.451975
10.9754	0.430819
10.9937	0.403893
11.012	0.480825
11.0304	0.411586
11.0487	0.434666
11.067	0.434666
11.0854	0.411586
11.1037	0.409663
11.1221	0.430819
11.1404	0.403893
11.1587	0.415433
11.1771	0.388506
11.1954	0.451975
11.2137	0.392353
11.2321	0.407739
11.2504	0.423126
11.2687	0.407739
11.2871	0.465438
11.3054	0.375043
11.3238	0.436589
11.3421	0.400046
11.3604	0.434666
11.3788	0.425049
11.3971	0.423126
11.4154	0.444282
11.4338	0.415433
11.4521	0.3962
11.4705	0.425049
11.4888	0.415433
11.5071	0.365427
11.5255	0.411586
11.5438	0.38466
11.5621	0.423126
11.5805	0.359657
11.5988	0.38466
11.6171	0.419279
11.6355	0.436589
11.6538	0.413509
11.6722	0.351964
11.6905	0.398123
11.7088	0.375043
11.7272	0.407739
11.7455	0.411586
11.7638	0.401969
11.7822	0.434666
11.8005	0.415433
11.8189	0.376967
11.8372	0.380813
11.8555	0.415433
11.8739	0.409663
11.8922	0.432742
11.9105	0.409663
11.9289	0.37889
11.9472	0.401969
11.9655	0.380813
11.9839	0.434666
12.0022	0.469285
12.0206	0.369273
12.0389	0.39043
12.0572	0.409663
12.0756	0.448129
12.0939	0.380813
12.1122	0.409663
12.1306	0.461592
12.1489	0.403893
12.1673	0.401969
12.1856	0.421202
12.2039	0.428896
12.2223	0.421202
12.2406	0.450052
12.2589	0.417356
12.2773	0.421202
12.2956	0.432742
12.3139	0.403893
12.3323	0.405816
12.3506	0.425049
12.369	0.434666
12.3873	0.436589
12.4056	0.417356
12.424	0.484671
12.4423	0.465438
12.4606	0.54237
12.479	0.471208
12.4973	0.525061
12.5157	0.515444
12.534	0.534677
12.5523	0.573143
12.5707	0.630842
12.589	0.630842
12.6073	0.821249
12.6257	0.811632
12.644	0.834712
12.6623	0.948186
12.6807	1.03666
12.699	1.21168
12.7174	1.2963
12.7357	1.48286
12.754	1.65404
12.7724	1.981
12.7907	2.15025
12.809	2.4272
12.8274	2.59068
12.8457	2.53875
12.8641	2.33296
12.8824	2.00408
12.9007	1.4444
12.9191	1.09436
12.9374	0.875101
12.9557	0.761626
12.9741	0.653922
12.9924	0.586606
13.0108	0.461592
13.0291	0.482748
13.0474	0.461592
13.0658	0.401969
13.0841	0.425049
13.1024	0.405816
13.1208	0.386583
13.1391	0.459668
13.1574	0.36735
13.1758	0.407739
13.1941	0.375043
13.2125	0.363503
13.2308	0.371197
13.2491	0.34427
13.2675	0.421202
13.2858	0.35004
13.3041	0.365427
13.3225	0.35581
13.3408	0.375043
13.3592	0.35581
13.3775	0.407739
13.3958	0.375043
13.4142	0.37889
13.4325	0.382736
13.4508	0.365427
13.4692	0.388506
13.4875	0.325038
13.5058	0.35004
13.5242	0.353887
13.5425	0.411586
13.5609	0.363503
13.5792	0.392353
13.5975	0.376967
13.6159	0.357734
13.6342	0.338501
13.6525	0.348117
13.6709	0.336577
13.6892	0.353887
13.7076	0.38466
13.7259	0.376967
13.7442	0.315421
13.7626	0.376967
13.7809	0.305805
13.7992	0.375043
13.8176	0.388506
13.8359	0.346194
13.8542	0.303881
13.8726	0.334654
13.8909	0.328884
13.9093	0.394276
13.9276	0.37312
13.9459	0.307728
13.9643	0.340424
13.9826	0.303881
14.0009	0.36735
14.0193	0.365427
14.0376	0.365427
14.056	0.328884
14.0743	0.380813
14.0926	0.371197
14.111	0.365427
14.1293	0.382736
14.1476	0.36158
14.166	0.348117
14.1843	0.400046
14.2026	0.313498
14.221	0.35004
14.2393	0.288495
14.2577	0.294265
14.276	0.37312
14.2943	0.326961
14.3127	0.328884
14.331	0.365427
14.3493	0.375043
14.3677	0.369273
14.386	0.317344
14.4044	0.36735
14.4227	0.38466
14.441	0.300035
14.4594	0.36158
14.4777	0.409663
14.496	0.323114
14.5144	0.382736
14.5327	0.388506
14.5511	0.363503
14.5694	0.369273
14.5877	0.457745
14.6061	0.386583
14.6244	0.386583
14.6427	0.400046
14.6611	0.332731
14.6794	0.442359
14.6977	0.455822
14.7161	0.434666
14.7344	0.388506
14.7528	0.421202
14.7711	0.451975
14.7894	0.417356
14.8078	0.486595
14.8261	0.459668
14.8444	0.471208
14.8628	0.482748
14.8811	0.409663
14.8995	0.425049
14.9178	0.37889
14.9361	0.386583
14.9545	0.369273
14.9728	0.330807
14.9911	0.35004
15.0095	0.36158
15.0278	0.340424
15.0461	0.36158
15.0645	0.311574
15.0828	0.317344
15.1012	0.317344
15.1195	0.315421
15.1378	0.286572
15.1562	0.342347
15.1745	0.351964
15.1928	0.346194
15.2112	0.36158
15.2295	0.348117
15.2479	0.35581
15.2662	0.365427
15.2845	0.35581
15.3029	0.315421
15.3212	0.348117
15.3395	0.330807
15.3579	0.346194
15.3762	0.39043
15.3945	0.328884
15.4129	0.307728
15.4312	0.38466
15.4496	0.315421
15.4679	0.382736
15.4862	0.35581
15.5046	0.334654
15.5229	0.351964
15.5412	0.36158
15.5596	0.325038
15.5779	0.37889
15.5963	0.36735
15.6146	0.359657
15.6329	0.38466
15.6513	0.415433
15.6696	0.336577
15.6879	0.423126
15.7063	0.382736
15.7246	0.37889
15.7429	0.37889
15.7613	0.430819
15.7796	0.415433
15.798	0.388506
15.8163	0.450052
15.8346	0.480825
15.853	0.398123
15.8713	0.450052
15.8896	0.450052
15.908	0.473132
15.9263	0.573143
15.9447	0.505828
15.963	0.609686
15.9813	0.707774
15.9997	0.678924
16.018	0.692388
16.0363	0.755856
16.0547	0.780859
16.073	0.719314
16.0914	0.651998
16.1097	0.650075
16.128	0.607762
16.1464	0.584683
16.1647	0.588529
16.183	0.436589
16.2014	0.471208
16.2197	0.403893
16.238	0.39043
16.2564	0.421202
16.2747	0.380813
16.2931	0.371197
16.3114	0.357734
16.3297	0.37889
16.3481	0.371197
16.3664	0.394276
16.3847	0.323114
16.4031	0.365427
16.4214	0.359657
16.4398	0.36158
16.4581	0.353887
16.4764	0.388506
16.4948	0.37889
16.5131	0.36158
16.5314	0.330807
16.5498	0.351964
16.5681	0.369273
16.5864	0.338501
16.6048	0.336577
16.6231	0.321191
16.6415	0.315421
16.6598	0.369273
16.6781	0.36735
16.6965	0.386583
16.7148	0.351964
16.7331	0.359657
16.7515	0.35581
16.7698	0.336577
16.7882	0.357734
16.8065	0.326961
16.8248	0.311574
16.8432	0.336577
16.8615	0.394276
16.8798	0.36735
16.8982	0.353887
16.9165	0.332731
16.9348	0.375043
16.9532	0.351964
16.9715	0.35581
16.9899	0.323114
17.0082	0.34427
17.0265	0.340424
17.0449	0.346194
17.0632	0.359657
17.0815	0.386583
17.0999	0.326961
17.1182	0.353887
17.1366	0.36158
17.1549	0.38466
17.1732	0.309651
17.1916	0.365427
17.2099	0.369273
17.2282	0.336577
17.2466	0.37312
17.2649	0.371197
17.2832	0.409663
17.3016	0.371197
17.3199	0.376967
17.3383	0.3962
17.3566	0.434666
17.3749	0.392353
17.3933	0.405816
17.4116	0.421202
17.4299	0.405816
17.4483	0.405816
17.4666	0.53083
17.485	0.438512
17.5033	0.471208
17.5216	0.532754
17.54	0.496211
17.5583	0.532754
17.5766	0.615456
17.595	0.550063
17.6133	0.684694
17.6316	0.702004
17.65	0.744317
17.6683	0.778936
17.6867	0.813555
17.705	0.705851
17.7233	0.690464
17.7417	0.730854
17.76	0.713544
17.7783	0.648152
17.7967	0.596223
17.815	0.569296
17.8334	0.550063
17.8517	0.54237
17.87	0.451975
17.8884	0.446205
17.9067	0.471208
17.925	0.484671
17.9434	0.421202
17.9617	0.444282
17.9801	0.423126
17.9984	0.36735
18.0167	0.411586
18.0351	0.457745
18.0534	0.371197
18.0717	0.405816
18.0901	0.423126
18.1084	0.446205
18.1267	0.457745
18.1451	0.432742
18.1634	0.448129
18.1818	0.444282
18.2001	0.423126
18.2184	0.453899
18.2368	0.478901
18.2551	0.436589
18.2734	0.39043
18.2918	0.371197
18.3101	0.444282
18.3285	0.434666
18.3468	0.409663
18.3651	0.428896
18.3835	0.417356
18.4018	0.382736
18.4201	0.38466
18.4385	0.432742
18.4568	0.380813
18.4751	0.376967
18.4935	0.401969
18.5118	0.363503
18.5302	0.436589
18.5485	0.382736
18.5668	0.417356
18.5852	0.38466
18.6035	0.386583
18.6218	0.375043
18.6402	0.411586
18.6585	0.421202
18.6769	0.419279
18.6952	0.3962
18.7135	0.444282
18.7319	0.436589
18.7502	0.448129
18.7685	0.421202
18.7869	0.421202
18.8052	0.444282
18.8235	0.446205
18.8419	0.446205
18.8602	0.476978
18.8786	0.492365
18.8969	0.39043
18.9152	0.523137
18.9336	0.436589
18.9519	0.469285
18.9702	0.465438
18.9886	0.488518
19.0069	0.3962
19.0253	0.459668
19.0436	0.534677
19.0619	0.476978
19.0803	0.490441
19.0986	0.490441
19.1169	0.473132
19.1353	0.532754
19.1536	0.521214
19.1719	0.594299
19.1903	0.575066
19.2086	0.667385
19.227	0.644305
19.2453	0.580836
19.2636	0.703927
19.282	0.703927
19.3003	0.7347
19.3186	0.74047
19.337	0.863561
19.3553	0.832788
19.3737	0.865484
19.392	0.948186
19.4103	1.12128
19.4287	1.09243
19.447	1.2136
19.4653	1.47517
19.4837	1.73866
19.502	2.07909
19.5204	2.56376
19.5387	2.708
19.557	3.5331
19.5754	4.21972
19.5937	5.26215
19.612	6.36804
19.6304	7.30661
19.6487	8.41636
19.667	9.04912
19.6854	8.98758
19.7037	8.29711
19.7221	7.19314
19.7404	5.63527
19.7587	4.65246
19.7771	3.35039
19.7954	2.49067
19.8137	1.85406
19.8321	1.55403
19.8504	1.39055
19.8688	1.03089
19.8871	1.02704
19.9054	0.886641
19.9238	0.838558
19.9421	0.75201
19.9604	0.644305
19.9788	0.719314
19.9971	0.688541
20.0154	0.575066
20.0338	0.601993
20.0521	0.575066
20.0705	0.557757
20.0888	0.503904
20.1071	0.525061
20.1255	0.511597
20.1438	0.517367
20.1621	0.53083
20.1805	0.486595
20.1988	0.494288
20.2172	0.480825
20.2355	0.471208
20.2538	0.455822
20.2722	0.511597
20.2905	0.469285
20.3088	0.480825
20.3272	0.473132
20.3455	0.461592
20.3638	0.446205
20.3822	0.459668
20.4005	0.448129
20.4189	0.494288
20.4372	0.517367
20.4555	0.490441
20.4739	0.415433
20.4922	0.444282
20.5105	0.471208
20.5289	0.507751
20.5472	0.478901
20.5656	0.465438
20.5839	0.519291
20.6022	0.523137
20.6206	0.523137
20.6389	0.509674
20.6572	0.53083
20.6756	0.457745
20.6939	0.503904
20.7122	0.492365
20.7306	0.409663
20.7489	0.517367
20.7673	0.450052
20.7856	0.496211
20.8039	0.501981
20.8223	0.534677
20.8406	0.407739
20.8589	0.511597
20.8773	0.517367
20.8956	0.494288
20.914	0.528907
20.9323	0.494288
20.9506	0.473132
20.969	0.528907
20.9873	0.596223
21.0056	0.607762
21.024	0.563527
21.0423	0.628919
21.0606	0.621226
21.079	0.594299
21.0973	0.607762
21.1157	0.56545
21.134	0.57122
21.1523	0.538524
21.1707	0.575066
21.189	0.615456
21.2073	0.569296
21.2257	0.546217
21.244	0.467362
21.2624	0.471208
21.2807	0.457745
21.299	0.538524
21.3174	0.496211
21.3357	0.515444
21.354	0.478901
21.3724	0.521214
21.3907	0.538524
21.4091	0.575066
21.4274	0.557757
21.4457	0.544294
21.4641	0.517367
21.4824	0.569296
21.5007	0.57699
21.5191	0.601993
21.5374	0.617379
21.5557	0.650075
21.5741	0.707774
21.5924	0.696234
21.6108	0.748163
21.6291	0.790476
21.6474	0.817402
21.6658	0.940493
21.6841	0.977036
21.7024	1.04435
21.7208	1.14821
21.7391	1.25399
21.7575	1.41747
21.7758	1.52902
21.7941	1.7579
21.8125	1.99254
21.8308	2.27719
21.8491	2.52144
21.8675	2.86764
21.8858	3.15421
21.9041	3.50233
21.9225	3.50233
21.9408	3.49463
21.9592	3.04458
21.9775	3.00035
21.9958	2.75609
22.0142	2.46952
22.0325	2.06178
22.0508	1.96946
22.0692	1.71558
22.0875	1.45786
22.1059	1.39631
22.1242	1.16937
22.1425	1.19822
22.1609	1.02896
22.1792	1.15398
22.1975	1.05781
22.2159	1.10013
22.2342	1.06935
22.2525	1.29246
22.2709	1.36939
22.2892	1.5271
22.3076	1.57711
22.3259	1.67904
22.3442	1.69443
22.3626	1.78867
22.3809	1.62711
22.3992	1.50402
22.4176	1.35016
22.4359	1.14436
22.4543	1.03089
22.4726	0.869331
22.4909	0.878948
22.5093	0.755856
22.5276	0.721237
22.5459	0.644305
22.5643	0.600069
22.5826	0.55968
22.6009	0.523137
22.6193	0.55391
22.6376	0.53083
22.656	0.54814
22.6743	0.494288
22.6926	0.484671
22.711	0.501981
22.7293	0.463515
22.7476	0.475055
22.766	0.471208
22.7843	0.465438
22.8027	0.403893
22.821	0.507751
22.8393	0.469285
22.8577	0.484671
22.876	0.496211
22.8943	0.400046
22.9127	0.455822
22.931	0.440435
22.9494	0.346194
22.9677	0.457745
22.986	0.430819
23.0044	0.38466
23.0227	0.400046
23.041	0.382736
23.0594	0.411586
23.0777	0.398123
23.096	0.413509
23.1144	0.405816
23.1327	0.375043
23.1511	0.38466
23.1694	0.421202
23.1877	0.401969
23.2061	0.403893
23.2244	0.417356
23.2427	0.484671
23.2611	0.365427
23.2794	0.359657
23.2978	0.426972
23.3161	0.401969
23.3344	0.3962
23.3528	0.438512
23.3711	0.413509
23.3894	0.451975
23.4078	0.425049
23.4261	0.440435
23.4444	0.455822
23.4628	0.501981
23.4811	0.469285
23.4995	0.442359
23.5178	0.480825
23.5361	0.448129
23.5545	0.482748
23.5728	0.490441
23.5911	0.440435
23.6095	0.442359
23.6278	0.492365
23.6462	0.480825
23.6645	0.430819
23.6828	0.425049
23.7012	0.438512
23.7195	0.442359
23.7378	0.375043
23.7562	0.425049
23.7745	0.405816
23.7928	0.413509
23.8112	0.392353
23.8295	0.407739
23.8479	0.386583
23.8662	0.419279
23.8845	0.455822
23.9029	0.400046
23.9212	0.421202
23.9395	0.3962
23.9579	0.415433
23.9762	0.398123
23.9946	0.459668
24.0129	0.39043
24.0312	0.394276
24.0496	0.455822
24.0679	0.426972
24.0862	0.490441
24.1046	0.476978
24.1229	0.517367
24.1412	0.523137
24.1596	0.634689
24.1779	0.698157
24.1963	0.663538
24.2146	0.821249
24.2329	0.844328
24.2513	0.842405
24.2696	1.03666
24.2879	1.14052
24.3063	1.20206
24.3246	1.40785
24.343	1.38862
24.3613	1.58095
24.3796	1.34246
24.398	1.33669
24.4163	1.17129
24.4346	1.19629
24.453	1.03281
24.4713	0.93857
24.4897	0.884717
24.508	0.813555
24.5263	0.800092
24.5447	0.655845
24.563	0.705851
24.5813	0.586606
24.5997	0.648152
24.618	0.540447
24.6363	0.546217
24.6547	0.56545
24.673	0.607762
24.6914	0.638535
24.7097	0.54237
24.728	0.630842
24.7464	0.640459
24.7647	0.578913
24.783	0.563527
24.8014	0.496211
24.8197	0.526984
24.8381	0.557757
24.8564	0.490441
24.8747	0.515444
24.8931	0.500058
24.9114	0.440435
24.9297	0.469285
24.9481	0.421202
24.9664	0.400046
24.9847	0.417356
25.0031	0.34427
25.0214	0.382736
25.0398	0.36735
25.0581	0.346194
25.0764	0.317344
25.0948	0.35581
25.1131	0.394276
25.1314	0.338501
25.1498	0.423126
25.1681	0.292341
25.1865	0.319268
25.2048	0.34427
25.2231	0.353887
25.2415	0.300035
25.2598	0.348117
25.2781	0.375043
25.2965	0.294265
25.3148	0.357734
25.3331	0.338501
25.3515	0.309651
25.3698	0.369273
25.3882	0.305805
25.4065	0.334654
25.4248	0.338501
25.4432	0.303881
25.4615	0.336577
25.4798	0.282725
25.4982	0.319268
25.5165	0.323114
25.5349	0.288495
25.5532	0.282725
25.5715	0.311574
25.5899	0.394276
25.6082	0.357734
25.6265	0.336577
25.6449	0.338501
25.6632	0.371197
25.6815	0.407739
25.6999	0.330807
25.7182	0.450052
25.7366	0.394276
25.7549	0.434666
25.7732	0.450052
25.7916	0.436589
25.8099	0.432742
25.8282	0.415433
25.8466	0.500058
25.8649	0.517367
25.8833	0.515444
25.9016	0.473132
25.9199	0.475055
25.9383	0.438512
25.9566	0.3962
25.9749	0.446205
25.9933	0.351964
26.0116	0.407739
26.0299	0.371197
26.0483	0.371197
26.0666	0.305805
26.085	0.351964
26.1033	0.340424
26.1216	0.303881
26.14	0.357734
26.1583	0.338501
26.1766	0.321191
26.195	0.328884
26.2133	0.282725
26.2317	0.296188
26.25	0.325038
26.2683	0.365427
26.2867	0.303881
26.305	0.309651
26.3233	0.292341
26.3417	0.336577
26.36	0.321191
26.3784	0.309651
26.3967	0.311574
26.415	0.311574
26.4334	0.271185
26.4517	0.315421
26.47	0.275032
26.4884	0.280802
26.5067	0.340424
26.525	0.276955
26.5434	0.319268
26.5617	0.290418
26.5801	0.284648
26.5984	0.34427
26.6167	0.300035
26.6351	0.315421
26.6534	0.336577
26.6717	0.315421
26.6901	0.334654
26.7084	0.342347
26.7268	0.321191
26.7451	0.36158
26.7634	0.371197
26.7818	0.36158
26.8001	0.400046
26.8184	0.426972
26.8368	0.438512
26.8551	0.511597
26.8734	0.428896
26.8918	0.525061
26.9101	0.467362
26.9285	0.503904
26.9468	0.534677
26.9651	0.525061
26.9835	0.509674
27.0018	0.455822
27.0201	0.405816
27.0385	0.432742
27.0568	0.421202
27.0752	0.392353
27.0935	0.375043
27.1118	0.359657
27.1302	0.375043
27.1485	0.375043
27.1668	0.346194
27.1852	0.332731
27.2035	0.301958
27.2218	0.365427
27.2402	0.357734
27.2585	0.428896
27.2769	0.326961
27.2952	0.326961
27.3135	0.421202
27.3319	0.386583
27.3502	0.423126
27.3685	0.421202
27.3869	0.392353
27.4052	0.455822
27.4236	0.492365
27.4419	0.465438
27.4602	0.475055
27.4786	0.590453
27.4969	0.623149
27.5152	0.700081
27.5336	0.74047
27.5519	0.853945
27.5702	0.894334
27.5886	0.990499
27.6069	1.04243
27.6253	1.01743
27.6436	1.08666
27.6619	1.08089
27.6803	1.00973
27.6986	0.969343
27.7169	0.969343
27.7353	0.780859
27.7536	0.694311
27.772	0.625072
27.7903	0.617379
27.8086	0.598146
27.827	0.486595
27.8453	0.54237
27.8636	0.476978
27.882	0.438512
27.9003	0.450052
27.9187	0.421202
27.937	0.428896
27.9553	0.39043
27.9737	0.407739
27.992	0.413509
28.0103	0.405816
28.0287	0.432742
28.047	0.353887
28.0653	0.340424
28.0837	0.334654
28.102	0.348117
28.1204	0.340424
28.1387	0.317344
28.157	0.301958
28.1754	0.357734
28.1937	0.313498
28.212	0.357734
28.2304	0.36158
28.2487	0.35004
28.2671	0.359657
28.2854	0.386583
28.3037	0.359657
28.3221	0.36158
28.3404	0.386583
28.3587	0.359657
28.3771	0.432742
28.3954	0.457745
28.4137	0.411586
28.4321	0.450052
28.4504	0.421202
28.4688	0.532754
28.4871	0.555833
28.5054	0.598146
28.5238	0.688541
28.5421	0.744317
28.5604	0.815479
28.5788	0.942416
28.5971	1.00973
28.6155	1.06551
28.6338	1.11167
28.6521	1.19437
28.6705	1.0982
28.6888	1.09051
28.7071	1.03089
28.7255	0.880871
28.7438	0.827018
28.7621	0.750087
28.7805	0.690464
28.7988	0.661615
28.8172	0.538524
28.8355	0.496211
28.8538	0.480825
28.8722	0.37312
28.8905	0.400046
28.9088	0.342347
28.9272	0.326961
28.9455	0.392353
28.9639	0.38466
28.9822	0.328884
29.0005	0.311574
29.0189	0.338501
29.0372	0.298111
29.0555	0.296188
29.0739	0.276955
29.0922	0.321191
29.1105	0.217333
29.1289	0.282725
29.1472	0.315421
29.1656	0.280802
29.1839	0.257722
29.2022	0.238489
29.2206	0.294265
29.2389	0.255799
29.2572	0.288495
29.2756	0.259645
29.2939	0.269262
29.3123	0.255799
29.3306	0.255799
29.3489	0.271185
29.3673	0.232719
29.3856	0.280802
29.4039	0.251952
29.4223	0.273108
29.4406	0.278878
29.4589	0.275032
29.4773	0.215409
29.4956	0.244259
29.514	0.276955
29.5323	0.261569
29.5506	0.286572
29.569	0.282725
29.5873	0.276955
29.6056	0.273108
29.624	0.292341
29.6423	0.305805
29.6607	0.265415
29.679	0.290418
29.6973	0.267339
29.7157	0.288495
29.734	0.257722
29.7523	0.261569
29.7707	0.271185
29.789	0.267339
29.8074	0.282725
29.8257	0.286572
29.844	0.282725
29.8624	0.236566
29.8807	0.359657
29.899	0.271185
29.9174	0.263492
29.9357	0.250029
29.954	0.265415
29.9724	0.278878
29.9907	0.278878
30.0091	0.275032
30.0274	0.309651
30.0457	0.276955
30.0641	0.284648
30.0824	0.280802
30.1007	0.267339
30.1191	0.238489
30.1374	0.213486
30.1558	0.213486
30.1741	0.211563
30.1924	0.230796
30.2108	0.219256
30.2291	0.250029
30.2474	0.246182
30.2658	0.221179
30.2841	0.217333
30.3024	0.20964
30.3208	0.215409
30.3391	0.217333
30.3575	0.244259
30.3758	0.223103
30.3941	0.200023
30.4125	0.261569
30.4308	0.207716
30.4491	0.213486
30.4675	0.213486
30.4858	0.232719
30.5042	0.226949
30.5225	0.19233
30.5408	0.219256
30.5592	0.213486
30.5775	0.215409
30.5958	0.234642
30.6142	0.196176
30.6325	0.213486
30.6508	0.20964
30.6692	0.242336
30.6875	0.200023
30.7059	0.223103
30.7242	0.253875
30.7425	0.228873
30.7609	0.20964
30.7792	0.184637
30.7975	0.200023
30.8159	0.251952
30.8342	0.205793
30.8526	0.225026
30.8709	0.246182
30.8892	0.240412
30.9076	0.255799
30.9259	0.275032
30.9442	0.253875
30.9626	0.288495
30.9809	0.257722
30.9992	0.259645
31.0176	0.271185
31.0359	0.244259
31.0543	0.275032
31.0726	0.261569
31.0909	0.253875
31.1093	0.253875
31.1276	0.263492
31.1459	0.257722
31.1643	0.242336
31.1826	0.232719
31.201	0.215409
31.2193	0.223103
31.2376	0.244259
31.256	0.240412
31.2743	0.263492
31.2926	0.228873
31.311	0.238489
31.3293	0.278878
31.3477	0.280802
31.366	0.280802
31.3843	0.300035
31.4027	0.296188
31.421	0.328884
31.4393	0.323114
31.4577	0.359657
31.476	0.417356
31.4943	0.409663
31.5127	0.380813
31.531	0.451975
31.5494	0.376967
31.5677	0.407739
31.586	0.342347
31.6044	0.34427
31.6227	0.357734
31.641	0.300035
31.6594	0.292341
31.6777	0.286572
31.6961	0.296188
31.7144	0.296188
31.7327	0.282725
31.7511	0.303881
31.7694	0.311574
31.7877	0.301958
31.8061	0.338501
31.8244	0.282725
31.8427	0.326961
31.8611	0.296188
31.8794	0.305805
31.8978	0.255799
31.9161	0.290418
31.9344	0.267339
31.9528	0.263492
31.9711	0.221179
31.9894	0.275032
32.0078	0.217333
32.0261	0.221179
32.0445	0.217333
32.0628	0.223103
32.0811	0.217333
32.0995	0.228873
32.1178	0.200023
32.1361	0.184637
32.1545	0.1981
32.1728	0.196176
32.1911	0.211563
32.2095	0.211563
32.2278	0.213486
32.2462	0.219256
32.2645	0.190407
32.2828	0.207716
32.3012	0.207716
32.3195	0.205793
32.3378	0.221179
32.3562	0.20387
32.3745	0.196176
32.3929	0.223103
32.4112	0.188483
32.4295	0.213486
32.4479	0.246182
32.4662	0.20387
32.4845	0.232719
32.5029	0.215409
32.5212	0.1981
32.5395	0.276955
32.5579	0.20964
32.5762	0.221179
32.5946	0.223103
32.6129	0.269262
32.6312	0.255799
32.6496	0.259645
32.6679	0.251952
32.6862	0.280802
32.7046	0.319268
32.7229	0.319268
32.7413	0.296188
32.7596	0.263492
32.7779	0.294265
32.7963	0.296188
32.8146	0.225026
32.8329	0.271185
32.8513	0.273108
32.8696	0.248106
32.888	0.225026
32.9063	0.248106
32.9246	0.221179
32.943	0.259645
32.9613	0.1981
32.9796	0.188483
32.998	0.18656
33.0163	0.190407
33.0346	0.196176
33.053	0.207716
33.0713	0.207716
33.0897	0.207716
33.108	0.178867
33.1263	0.190407
33.1447	0.194253
33.163	0.178867
33.1813	0.230796
33.1997	0.221179
33.218	0.20387
33.2364	0.223103
33.2547	0.228873
33.273	0.1981
33.2914	0.213486
33.3097	0.219256
33.328	0.200023
33.3464	0.194253
33.3647	0.20387
33.383	0.211563
33.4014	0.221179
33.4197	0.211563
33.4381	0.226949
33.4564	0.232719
33.4747	0.211563
33.4931	0.226949
33.5114	0.20964
33.5297	0.19233
33.5481	0.19233
33.5664	0.190407
33.5848	0.173097
33.6031	0.196176
33.6214	0.200023
33.6398	0.207716
33.6581	0.211563
33.6764	0.201946
33.6948	0.215409
33.7131	0.205793
33.7314	0.261569
33.7498	0.215409
33.7681	0.219256
33.7865	0.201946
33.8048	0.251952
33.8231	0.257722
33.8415	0.215409
33.8598	0.259645
33.8781	0.246182
33.8965	0.234642
33.9148	0.284648
33.9332	0.286572
33.9515	0.315421
33.9698	0.311574
33.9882	0.328884
34.0065	0.336577
34.0248	0.353887
34.0432	0.469285
34.0615	0.450052
34.0798	0.507751
34.0982	0.598146
34.1165	0.584683
34.1349	0.646228
34.1532	0.623149
34.1715	0.634689
34.1899	0.657768
34.2082	0.611609
34.2265	0.550063
34.2449	0.494288
34.2632	0.575066
34.2816	0.465438
34.2999	0.426972
34.3182	0.376967
34.3366	0.313498
34.3549	0.321191
34.3732	0.315421
34.3916	0.307728
34.4099	0.255799
34.4282	0.250029
34.4466	0.261569
34.4649	0.246182
34.4833	0.213486
34.5016	0.213486
34.5199	0.248106
34.5383	0.20964
34.5566	0.226949
34.5749	0.244259
34.5933	0.19233
34.6116	0.238489
34.63	0.201946
34.6483	0.18079
34.6666	0.211563
34.685	0.207716
34.7033	0.16348
34.7216	0.223103
34.74	0.18656
34.7583	0.196176
34.7767	0.213486
34.795	0.171174
34.8133	0.207716
34.8317	0.219256
34.85	0.18656
34.8683	0.176943
34.8867	0.207716
34.905	0.225026
34.9233	0.155787
34.9417	0.19233
34.96	0.200023
34.9784	0.215409
34.9967	0.159634
35.015	0.176943
35.0334	0.200023
35.0517	0.215409
35.07	0.190407
35.0884	0.178867
35.1067	0.207716
35.1251	0.18656
35.1434	0.215409
35.1617	0.17502
35.1801	0.1981
35.1984	0.211563
35.2167	0.176943
35.2351	0.196176
35.2534	0.221179
35.2717	0.184637
35.2901	0.1981
35.3084	0.205793
35.3268	0.178867
35.3451	0.205793
35.3634	0.1981
35.3818	0.232719
35.4001	0.194253
35.4184	0.236566
35.4368	0.20387
35.4551	0.240412
35.4735	0.228873
35.4918	0.213486
35.5101	0.207716
35.5285	0.200023
35.5468	0.223103
35.5651	0.255799
35.5835	0.217333
35.6018	0.219256
35.6201	0.236566
35.6385	0.298111
35.6568	0.276955
35.6752	0.286572
35.6935	0.323114
35.7118	0.328884
35.7302	0.36158
35.7485	0.409663
35.7668	0.37889
35.7852	0.455822
35.8035	0.492365
35.8219	0.511597
35.8402	0.394276
35.8585	0.405816
35.8769	0.448129
35.8952	0.463515
35.9135	0.398123
35.9319	0.36158
35.9502	0.403893
35.9685	0.332731
35.9869	0.340424
36.0052	0.286572
36.0236	0.334654
36.0419	0.315421
36.0602	0.236566
36.0786	0.263492
36.0969	0.273108
36.1152	0.280802
36.1336	0.294265
36.1519	0.246182
36.1703	0.242336
36.1886	0.236566
36.2069	0.234642
36.2253	0.217333
36.2436	0.228873
36.2619	0.194253
36.2803	0.217333
36.2986	0.228873
36.317	0.18079
36.3353	0.211563
36.3536	0.244259
36.372	0.20964
36.3903	0.205793
36.4086	0.178867
36.427	0.205793
36.4453	0.205793
36.4636	0.182713
36.482	0.194253
36.5003	0.188483
36.5187	0.205793
36.537	0.200023
36.5553	0.173097
36.5737	0.176943
36.592	0.221179
36.6103	0.211563
36.6287	0.20964
36.647	0.188483
36.6654	0.188483
36.6837	0.176943
36.702	0.188483
36.7204	0.184637
36.7387	0.188483
36.757	0.240412
36.7754	0.16925
36.7937	0.201946
36.812	0.211563
36.8304	0.182713
36.8487	0.230796
36.8671	0.20387
36.8854	0.215409
36.9037	0.253875
36.9221	0.255799
36.9404	0.228873
36.9587	0.228873
36.9771	0.226949
36.9954	0.238489
37.0138	0.205793
37.0321	0.18656
37.0504	0.251952
37.0688	0.1981
37.0871	0.230796
37.1054	0.217333
37.1238	0.182713
37.1421	0.173097
37.1604	0.159634
37.1788	0.167327
37.1971	0.19233
37.2155	0.188483
37.2338	0.184637
37.2521	0.200023
37.2705	0.173097
37.2888	0.188483
37.3071	0.19233
37.3255	0.18656
37.3438	0.19233
37.3622	0.161557
37.3805	0.17502
37.3988	0.167327
37.4172	0.171174
37.4355	0.17502
37.4538	0.17502
37.4722	0.19233
37.4905	0.196176
37.5088	0.16925
37.5272	0.142324
37.5455	0.184637
37.5639	0.211563
37.5822	0.188483
37.6005	0.205793
37.6189	0.196176
37.6372	0.188483
37.6555	0.19233
37.6739	0.20964
37.6922	0.16925
37.7106	0.211563
37.7289	0.16925
37.7472	0.176943
37.7656	0.165404
37.7839	0.188483
37.8022	0.176943
37.8206	0.190407
37.8389	0.18656
37.8572	0.153864
37.8756	0.178867
37.8939	0.178867
37.9123	0.165404
37.9306	0.188483
37.9489	0.19233
37.9673	0.188483
37.9856	0.201946
38.0039	0.178867
38.0223	0.178867
38.0406	0.182713
38.059	0.17502
38.0773	0.165404
38.0956	0.1981
38.114	0.194253
38.1323	0.161557
38.1506	0.150017
38.169	0.16925
38.1873	0.128861
38.2057	0.157711
38.224	0.165404
38.2423	0.178867
38.2607	0.18656
38.279	0.155787
38.2973	0.171174
38.3157	0.211563
38.334	0.20964
38.3523	0.171174
38.3707	0.153864
38.389	0.178867
38.4074	0.1981
38.4257	0.17502
38.444	0.18656
38.4624	0.16925
38.4807	0.196176
38.499	0.196176
38.5174	0.151941
38.5357	0.196176
38.5541	0.215409
38.5724	0.20387
38.5907	0.200023
38.6091	0.205793
38.6274	0.215409
38.6457	0.18079
38.6641	0.155787
38.6824	0.188483
38.7007	0.20387
38.7191	0.20964
38.7374	0.1981
38.7558	0.182713
38.7741	0.182713
38.7924	0.165404
38.8108	0.201946
38.8291	0.167327
38.8474	0.184637
38.8658	0.20964
38.8841	0.182713
38.9025	0.201946
38.9208	0.165404
38.9391	0.228873
38.9575	0.219256
38.9758	0.159634
38.9941	0.18656
39.0125	0.17502
39.0308	0.18656
39.0491	0.201946
39.0675	0.236566
39.0858	0.184637
39.1042	0.242336
39.1225	0.267339
39.1408	0.223103
39.1592	0.242336
39.1775	0.232719
39.1958	0.19233
39.2142	0.251952
39.2325	0.223103
39.2509	0.244259
39.2692	0.228873
39.2875	0.228873
39.3059	0.205793
39.3242	0.259645
39.3425	0.234642
39.3609	0.246182
39.3792	0.255799
39.3975	0.213486
39.4159	0.238489
39.4342	0.215409
39.4526	0.18079
39.4709	0.184637
39.4892	0.178867
39.5076	0.221179
39.5259	0.213486
39.5442	0.190407
39.5626	0.207716
39.5809	0.171174
39.5993	0.215409
39.6176	0.178867
39.6359	0.173097
39.6543	0.217333
39.6726	0.20387
39.6909	0.201946
39.7093	0.225026
39.7276	0.230796
39.746	0.221179
39.7643	0.205793
39.7826	0.221179
39.801	0.190407
39.8193	0.215409
39.8376	0.265415
39.856	0.246182
39.8743	0.263492
39.8926	0.286572
39.911	0.292341
39.9293	0.311574
39.9477	0.321191
39.966	0.36735
39.9843	0.388506
40.0027	0.37889
40.021	0.334654
40.0393	0.323114
40.0577	0.313498
40.076	0.300035
40.0944	0.301958
40.1127	0.286572
40.131	0.273108
40.1494	0.207716
40.1677	0.221179
40.186	0.225026
40.2044	0.213486
40.2227	0.190407
40.241	0.205793
40.2594	0.221179
40.2777	0.19233
40.2961	0.221179
40.3144	0.18656
40.3327	0.242336
40.3511	0.242336
40.3694	0.190407
40.3877	0.244259
40.4061	0.230796
40.4244	0.232719
40.4428	0.225026
40.4611	0.275032
40.4794	0.217333
40.4978	0.269262
40.5161	0.226949
40.5344	0.205793
[truncated: 1,056 more rows]

## Sheet: Heating 85 °C
2theta	Intensity
3.89731	1.41939
3.91565	1.43286
3.93399	1.39824
3.95232	1.45594
3.97066	1.45017
3.989	1.4444
4.00733	1.4694
4.02567	1.38285
4.04401	1.40016
4.06234	1.44632
4.08068	1.38862
4.09902	1.37516
4.11735	1.48094
4.13569	1.41362
4.15403	1.3867
4.17237	1.38093
4.1907	1.32323
4.20904	1.329
4.22738	1.30207
4.24571	1.304
4.26405	1.30015
4.28239	1.33669
4.30072	1.32708
4.31906	1.35208
4.3374	1.37131
4.35573	1.27515
4.37407	1.32323
4.39241	1.26745
4.41075	1.2713
4.42908	1.31361
4.44742	1.28669
4.46576	1.28861
4.48409	1.30592
4.50243	1.30015
4.52077	1.30207
4.5391	1.2963
4.55744	1.25976
4.57578	1.22706
4.59411	1.36747
4.61245	1.25784
4.63079	1.22514
4.64913	1.31169
4.66746	1.28092
4.6858	1.20399
4.70414	1.19052
4.72247	1.20975
4.74081	1.19437
4.75915	1.18091
4.77748	1.21937
4.79582	1.26361
4.81416	1.16552
4.83249	1.14821
4.85083	1.22706
4.86917	1.16744
4.8875	1.21552
4.90584	1.1886
4.92418	1.22899
4.94252	1.17706
4.96085	1.08474
4.97919	1.21937
4.99753	1.13282
5.01586	1.20783
5.0342	1.12513
5.05254	1.16937
5.07087	1.11936
5.08921	1.11359
5.10755	1.11744
5.12588	1.15206
5.14422	1.12513
5.16256	1.13475
5.1809	1.18668
5.19923	1.1886
5.21757	1.11936
5.23591	1.16937
5.25424	1.10397
5.27258	1.16937
5.29092	1.04435
5.30925	1.1059
5.32759	1.18091
5.34593	1.10782
5.36426	1.05204
5.3826	1.08859
5.40094	1.14629
5.41927	1.11744
5.43761	1.0982
5.45595	1.10974
5.47429	1.12321
5.49262	1.14821
5.51096	1.10974
5.5293	1.08859
5.54763	1.09051
5.56597	1.06166
5.58431	1.14244
5.60264	1.10974
5.62098	1.1059
5.63932	1.09051
5.65765	1.06743
5.67599	1.03473
5.69433	1.16937
5.71267	1.09628
5.731	1.07897
5.74934	1.09051
5.76768	1.16937
5.78601	1.11167
5.80435	1.12898
5.82269	1.02896
5.84102	1.08474
5.85936	1.14821
5.8777	1.11167
5.89603	1.32515
5.91437	1.15398
5.93271	1.18283
5.95104	1.18475
5.96938	1.17514
5.98772	1.34823
6.00606	1.21552
6.02439	1.26745
6.04273	1.29246
6.06107	1.27899
6.0794	1.25014
6.09774	1.31169
6.11608	1.36362
6.13441	1.25399
6.15275	1.38285
6.17109	1.354
6.18942	1.35593
6.20776	1.49825
6.2261	1.5021
6.24444	1.4944
6.26277	1.61365
6.28111	1.63865
6.29945	1.54826
6.31778	1.68096
6.33612	1.69827
6.35446	1.75597
6.37279	1.78867
6.39113	1.83098
6.40947	1.92138
6.4278	2.04254
6.44614	2.00215
6.46448	2.18294
6.48282	2.22333
6.50115	2.33104
6.51949	2.36373
6.53783	2.74455
6.55616	2.6907
6.5745	2.85033
6.59284	3.10228
6.61117	3.36193
6.62951	3.32154
6.64785	3.46001
6.66618	3.80236
6.68452	4.05624
6.70286	4.44859
6.72119	4.51398
6.73953	4.81594
6.75787	5.41216
6.77621	5.47371
6.79454	6.01416
6.81288	6.37381
6.83122	6.79886
6.84955	7.26238
6.86789	7.97592
6.88623	8.57599
6.90456	9.58957
6.9229	10.5801
6.94124	11.1686
6.95957	12.0399
6.97791	13.2977
6.99625	14.4728
7.01459	15.6383
7.03292	17.4982
7.05126	18.9618
7.0696	21.0544
7.08793	22.8411
7.10627	25.2779
7.12461	27.2474
7.14294	30.215
7.16128	33.2019
7.17962	36.4427
7.19795	40.2123
7.21629	45.3975
7.23463	51.5483
7.25296	59.0549
7.2713	67.05
7.28964	77.5243
7.30798	89.5488
7.32631	103.135
7.34465	118.085
7.36299	132.794
7.38132	142.913
7.39966	142.139
7.418	127.788
7.43633	103.589
7.45467	78.4898
7.47301	58.5029
7.49134	41.4086
7.50968	29.0226
7.52802	22.0198
7.54636	17.4578
7.56469	13.4304
7.58303	10.3281
7.60137	7.372
7.6197	5.52948
7.63804	4.0947
7.65638	3.33885
7.67471	2.87341
7.69305	2.53298
7.71139	2.37143
7.72972	2.13486
7.74806	2.05985
7.7664	1.87329
7.78473	1.83483
7.80307	1.60788
7.82141	1.53864
7.83975	1.58095
7.85808	1.41747
7.87642	1.43478
7.89476	1.27515
7.91309	1.30592
7.93143	1.20206
7.94977	1.1559
7.9681	1.18475
7.98644	1.10397
8.00478	1.03473
8.02311	1.10013
8.04145	1.00204
8.05979	0.980882
8.07813	0.934723
8.09646	0.850098
8.1148	0.857791
8.13314	0.946263
8.15147	0.90395
8.16981	0.886641
8.18815	0.815479
8.20648	0.800092
8.22482	0.798169
8.24316	0.838558
8.26149	0.838558
8.27983	0.680848
8.29817	0.74047
8.3165	0.730854
8.33484	0.76932
8.35318	0.736623
8.37152	0.703927
8.38985	0.705851
8.40819	0.659691
8.42653	0.667385
8.44486	0.690464
8.4632	0.765473
8.48154	0.692388
8.49987	0.688541
8.51821	0.628919
8.53655	0.702004
8.55488	0.613532
8.57322	0.667385
8.59156	0.671231
8.6099	0.727007
8.62823	0.663538
8.64657	0.603916
8.66491	0.603916
8.68324	0.613532
8.70158	0.615456
8.71992	0.638535
8.73825	0.57122
8.75659	0.619302
8.77493	0.607762
8.79326	0.54237
8.8116	0.619302
8.82994	0.592376
8.84828	0.57122
8.86661	0.601993
8.88495	0.619302
8.90329	0.561603
8.92162	0.563527
8.93996	0.569296
8.9583	0.607762
8.97663	0.513521
8.99497	0.626995
9.01331	0.540447
9.03164	0.507751
9.04998	0.601993
9.06832	0.563527
9.08665	0.590453
9.10499	0.58276
9.12333	0.557757
9.14167	0.590453
9.16	0.555833
9.17834	0.567373
9.19668	0.563527
9.21501	0.57699
9.23335	0.455822
9.25169	0.513521
9.27002	0.538524
9.28836	0.586606
9.3067	0.5366
9.32503	0.5366
9.34337	0.496211
9.36171	0.517367
9.38005	0.55391
9.39838	0.507751
9.41672	0.534677
9.43506	0.525061
9.45339	0.511597
9.47173	0.54237
9.49007	0.486595
9.5084	0.500058
9.52674	0.511597
9.54508	0.490441
9.56341	0.500058
9.58175	0.492365
9.60009	0.511597
9.61842	0.528907
9.63676	0.544294
9.6551	0.517367
9.67344	0.519291
9.69177	0.513521
9.71011	0.528907
9.72845	0.538524
9.74678	0.525061
9.76512	0.538524
9.78346	0.484671
9.80179	0.503904
9.82013	0.521214
9.83847	0.538524
9.8568	0.471208
9.87514	0.509674
9.89348	0.507751
9.91182	0.434666
9.93015	0.507751
9.94849	0.494288
9.96683	0.430819
9.98516	0.519291
10.0035	0.455822
10.0218	0.457745
10.0402	0.475055
10.0585	0.448129
10.0768	0.432742
10.0952	0.438512
10.1135	0.503904
10.1319	0.478901
10.1502	0.442359
10.1685	0.473132
10.1869	0.476978
10.2052	0.438512
10.2235	0.400046
10.2419	0.455822
10.2602	0.457745
10.2786	0.37889
10.2969	0.482748
10.3152	0.467362
10.3336	0.450052
10.3519	0.463515
10.3702	0.438512
10.3886	0.476978
10.4069	0.3962
10.4252	0.459668
10.4436	0.455822
10.4619	0.438512
10.4803	0.357734
10.4986	0.428896
10.5169	0.480825
10.5353	0.401969
10.5536	0.438512
10.5719	0.400046
10.5903	0.405816
10.6086	0.411586
10.627	0.461592
10.6453	0.480825
10.6636	0.463515
10.682	0.403893
10.7003	0.425049
10.7186	0.442359
10.737	0.37889
10.7553	0.407739
10.7736	0.413509
10.792	0.463515
10.8103	0.413509
10.8287	0.438512
10.847	0.403893
10.8653	0.407739
10.8837	0.475055
10.902	0.359657
10.9203	0.407739
10.9387	0.407739
10.957	0.457745
10.9754	0.438512
10.9937	0.3962
11.012	0.448129
11.0304	0.475055
11.0487	0.455822
11.067	0.401969
11.0854	0.403893
11.1037	0.407739
11.1221	0.405816
11.1404	0.463515
11.1587	0.455822
11.1771	0.425049
11.1954	0.453899
11.2137	0.401969
11.2321	0.392353
11.2504	0.423126
11.2687	0.442359
11.2871	0.409663
11.3054	0.413509
11.3238	0.386583
11.3421	0.423126
11.3604	0.388506
11.3788	0.37889
11.3971	0.375043
11.4154	0.401969
11.4338	0.398123
11.4521	0.39043
11.4705	0.400046
11.4888	0.388506
11.5071	0.411586
11.5255	0.401969
11.5438	0.428896
11.5621	0.444282
11.5805	0.376967
11.5988	0.386583
11.6171	0.369273
11.6355	0.39043
11.6538	0.37312
11.6722	0.409663
11.6905	0.400046
11.7088	0.359657
11.7272	0.405816
11.7455	0.423126
11.7638	0.398123
11.7822	0.407739
11.8005	0.413509
11.8189	0.394276
11.8372	0.340424
11.8555	0.403893
11.8739	0.430819
11.8922	0.386583
11.9105	0.425049
11.9289	0.436589
11.9472	0.363503
11.9655	0.401969
11.9839	0.403893
12.0022	0.409663
12.0206	0.35581
12.0389	0.39043
12.0572	0.394276
12.0756	0.398123
12.0939	0.448129
12.1122	0.417356
12.1306	0.413509
12.1489	0.442359
12.1673	0.421202
12.1856	0.436589
12.2039	0.400046
12.2223	0.448129
12.2406	0.444282
12.2589	0.376967
12.2773	0.400046
12.2956	0.436589
12.3139	0.403893
12.3323	0.448129
12.3506	0.442359
12.369	0.453899
12.3873	0.492365
12.4056	0.490441
12.424	0.498134
12.4423	0.471208
12.4606	0.490441
12.479	0.519291
12.4973	0.515444
12.5157	0.594299
12.534	0.557757
12.5523	0.630842
12.5707	0.650075
12.589	0.711621
12.6073	0.782783
12.6257	0.811632
12.644	0.946263
12.6624	0.94434
12.6807	1.06358
12.699	1.21745
12.7174	1.45017
12.7357	1.59634
12.754	1.84252
12.7724	2.27719
12.7907	2.32142
12.809	2.63492
12.8274	2.5753
12.8457	2.33296
12.8641	2.05024
12.8824	1.4694
12.9007	1.17129
12.9191	0.913567
12.9374	0.773166
12.9557	0.590453
12.9741	0.57122
12.9924	0.467362
13.0108	0.482748
13.0291	0.467362
13.0474	0.478901
13.0658	0.371197
13.0841	0.430819
13.1024	0.419279
13.1208	0.3962
13.1391	0.398123
13.1574	0.38466
13.1758	0.371197
13.1941	0.401969
13.2125	0.36158
13.2308	0.371197
13.2491	0.35004
13.2675	0.340424
13.2858	0.376967
13.3041	0.375043
13.3225	0.375043
13.3408	0.35004
13.3592	0.351964
13.3775	0.353887
13.3958	0.426972
13.4142	0.382736
13.4325	0.332731
13.4508	0.338501
13.4692	0.417356
13.4875	0.346194
13.5058	0.319268
13.5242	0.400046
13.5425	0.400046
13.5609	0.338501
13.5792	0.380813
13.5975	0.365427
13.6159	0.309651
13.6342	0.363503
13.6525	0.348117
13.6709	0.363503
13.6892	0.334654
13.7076	0.39043
13.7259	0.36735
13.7442	0.294265
13.7626	0.365427
13.7809	0.336577
13.7992	0.365427
13.8176	0.336577
13.8359	0.300035
13.8542	0.351964
13.8726	0.369273
13.8909	0.346194
13.9093	0.346194
13.9276	0.388506
13.9459	0.369273
13.9643	0.321191
13.9826	0.37312
14.0009	0.348117
14.0193	0.326961
14.0376	0.342347
14.056	0.336577
14.0743	0.403893
14.0926	0.336577
14.111	0.37312
14.1293	0.34427
14.1476	0.332731
14.166	0.375043
14.1843	0.311574
14.2026	0.371197
14.221	0.371197
14.2393	0.369273
14.2577	0.398123
14.276	0.34427
14.2943	0.35581
14.3127	0.369273
14.331	0.351964
14.3493	0.36735
14.3677	0.323114
14.386	0.382736
14.4044	0.325038
14.4227	0.317344
14.441	0.334654
14.4594	0.394276
14.4777	0.338501
14.496	0.388506
14.5144	0.405816
14.5327	0.375043
14.5511	0.317344
14.5694	0.415433
14.5877	0.386583
14.6061	0.336577
14.6244	0.405816
14.6427	0.382736
14.6611	0.436589
14.6794	0.382736
14.6977	0.440435
14.7161	0.36735
14.7344	0.457745
14.7528	0.440435
14.7711	0.428896
14.7894	0.451975
14.8078	0.484671
14.8261	0.473132
14.8444	0.451975
14.8628	0.463515
14.8811	0.403893
14.8995	0.400046
14.9178	0.388506
14.9361	0.319268
14.9545	0.363503
14.9728	0.357734
14.9911	0.334654
15.0095	0.36158
15.0278	0.357734
15.0461	0.323114
15.0645	0.351964
15.0828	0.342347
15.1012	0.298111
15.1195	0.294265
15.1378	0.3962
15.1562	0.34427
15.1745	0.363503
15.1928	0.292341
15.2112	0.34427
15.2295	0.363503
15.2479	0.321191
15.2662	0.353887
15.2845	0.326961
15.3029	0.334654
15.3212	0.311574
15.3395	0.346194
15.3579	0.346194
15.3762	0.313498
15.3945	0.338501
15.4129	0.330807
15.4312	0.359657
15.4496	0.38466
15.4679	0.319268
15.4862	0.376967
15.5046	0.336577
15.5229	0.351964
15.5412	0.365427
15.5596	0.365427
15.5779	0.37312
15.5963	0.365427
15.6146	0.36158
15.6329	0.305805
15.6513	0.359657
15.6696	0.338501
15.6879	0.309651
15.7063	0.37889
15.7246	0.419279
15.7429	0.419279
15.7613	0.438512
15.7796	0.455822
15.798	0.426972
15.8163	0.455822
15.8346	0.448129
15.853	0.436589
15.8713	0.517367
15.8896	0.453899
15.908	0.601993
15.9263	0.592376
15.9447	0.634689
15.963	0.644305
15.9813	0.703927
15.9997	0.711621
16.018	0.661615
16.0363	0.644305
16.0547	0.700081
16.073	0.700081
16.0914	0.688541
16.1097	0.586606
16.128	0.540447
16.1464	0.609686
16.1647	0.578913
16.183	0.475055
16.2014	0.453899
16.2197	0.500058
16.238	0.455822
16.2564	0.394276
16.2747	0.417356
16.2931	0.309651
16.3114	0.39043
16.3297	0.394276
16.3481	0.382736
16.3664	0.35004
16.3847	0.36735
16.4031	0.37889
16.4214	0.37889
16.4398	0.39043
16.4581	0.332731
16.4764	0.340424
16.4948	0.330807
16.5131	0.363503
16.5314	0.400046
16.5498	0.348117
16.5681	0.323114
16.5864	0.357734
16.6048	0.338501
16.6231	0.369273
16.6415	0.375043
16.6598	0.37889
16.6781	0.342347
16.6965	0.338501
16.7148	0.309651
16.7331	0.321191
16.7515	0.365427
16.7698	0.342347
16.7882	0.36735
16.8065	0.307728
16.8248	0.382736
16.8432	0.303881
16.8615	0.342347
16.8798	0.37312
16.8982	0.351964
16.9165	0.380813
16.9348	0.301958
16.9532	0.334654
16.9715	0.340424
16.9899	0.348117
17.0082	0.37312
17.0265	0.35581
17.0449	0.369273
17.0632	0.340424
17.0815	0.376967
17.0999	0.346194
17.1182	0.336577
17.1366	0.3962
17.1549	0.363503
17.1732	0.351964
17.1916	0.386583
17.2099	0.35581
17.2282	0.386583
17.2466	0.319268
17.2649	0.369273
17.2832	0.359657
17.3016	0.442359
17.3199	0.375043
17.3383	0.407739
17.3566	0.39043
17.3749	0.419279
17.3933	0.413509
17.4116	0.446205
17.4299	0.434666
17.4483	0.375043
17.4666	0.401969
17.485	0.436589
17.5033	0.457745
17.5216	0.523137
17.54	0.53083
17.5583	0.54237
17.5766	0.650075
17.595	0.638535
17.6133	0.611609
17.6316	0.648152
17.65	0.715467
17.6683	0.732777
17.6867	0.730854
17.705	0.800092
17.7233	0.753933
17.7417	0.661615
17.76	0.675078
17.7783	0.546217
17.7967	0.586606
17.815	0.567373
17.8334	0.544294
17.8517	0.523137
17.87	0.413509
17.8884	0.421202
17.9067	0.419279
17.925	0.417356
17.9434	0.392353
17.9617	0.400046
17.9801	0.415433
17.9984	0.380813
18.0167	0.469285
18.0351	0.428896
18.0534	0.426972
18.0717	0.453899
18.0901	0.351964
18.1084	0.467362
18.1267	0.451975
18.1451	0.403893
18.1634	0.469285
18.1818	0.471208
18.2001	0.465438
18.2184	0.438512
18.2368	0.476978
18.2551	0.461592
18.2734	0.478901
18.2918	0.407739
18.3101	0.419279
18.3285	0.415433
18.3468	0.434666
18.3651	0.376967
18.3835	0.338501
18.4018	0.411586
18.4201	0.376967
18.4385	0.363503
18.4568	0.417356
18.4751	0.403893
18.4935	0.401969
18.5118	0.401969
18.5302	0.401969
18.5485	0.434666
18.5668	0.401969
18.5852	0.365427
18.6035	0.400046
18.6218	0.415433
18.6402	0.419279
18.6585	0.438512
18.6769	0.392353
18.6952	0.438512
18.7135	0.448129
18.7319	0.392353
18.7502	0.421202
18.7685	0.453899
18.7869	0.461592
18.8052	0.461592
18.8235	0.463515
18.8419	0.503904
18.8602	0.409663
18.8786	0.509674
18.8969	0.423126
18.9152	0.3962
18.9336	0.459668
18.9519	0.492365
18.9702	0.498134
18.9886	0.455822
19.0069	0.501981
19.0253	0.482748
19.0436	0.55968
19.0619	0.450052
19.0803	0.482748
19.0986	0.546217
19.1169	0.507751
19.1353	0.519291
19.1536	0.561603
19.1719	0.621226
19.1903	0.600069
19.2086	0.669308
19.227	0.671231
19.2453	0.692388
19.2636	0.690464
19.282	0.696234
19.3003	0.750087
19.3186	0.859715
19.337	0.821249
19.3553	0.894334
19.3737	1.0155
19.392	1.16552
19.4103	1.2713
19.4287	1.47709
19.447	1.51941
19.4653	1.77328
19.4837	2.16371
19.502	2.53683
19.5204	3.1042
19.5387	3.80621
19.557	4.62746
19.5754	5.47371
19.5937	6.67
19.612	7.67204
19.6304	8.24903
19.6487	9.13567
19.667	8.66254
19.6854	7.6605
19.7037	6.59499
19.7221	5.29292
19.7404	3.98315
19.7587	2.99265
19.7771	2.33296
19.7954	1.7579
19.8137	1.56749
19.8321	1.26938
19.8504	1.16937
19.8688	1.03089
19.8871	0.880871
19.9054	0.755856
19.9238	0.750087
19.9421	0.721237
19.9604	0.694311
19.9788	0.646228
19.9971	0.642382
20.0154	0.569296
20.0338	0.619302
20.0521	0.526984
20.0705	0.532754
20.0888	0.507751
20.1071	0.490441
20.1255	0.521214
20.1438	0.494288
20.1621	0.484671
20.1805	0.563527
20.1988	0.526984
20.2172	0.480825
20.2355	0.457745
20.2538	0.501981
20.2722	0.513521
20.2905	0.505828
20.3088	0.463515
20.3272	0.457745
20.3455	0.492365
20.3638	0.473132
20.3822	0.457745
20.4005	0.494288
20.4189	0.476978
20.4372	0.457745
20.4555	0.471208
20.4739	0.486595
20.4922	0.528907
20.5105	0.496211
20.5289	0.500058
20.5472	0.494288
20.5656	0.505828
20.5839	0.523137
20.6022	0.455822
20.6206	0.482748
20.6389	0.475055
20.6572	0.473132
20.6756	0.492365
20.6939	0.463515
20.7122	0.426972
20.7306	0.476978
20.7489	0.503904
20.7673	0.488518
20.7856	0.484671
20.8039	0.526984
20.8223	0.415433
20.8406	0.461592
20.8589	0.494288
20.8773	0.515444
20.8956	0.511597
20.914	0.54237
20.9323	0.57122
20.9506	0.601993
20.969	0.555833
20.9873	0.573143
21.0056	0.596223
21.024	0.653922
21.0423	0.671231
21.0607	0.613532
21.079	0.680848
21.0973	0.57122
21.1157	0.58276
21.134	0.511597
21.1523	0.521214
21.1707	0.486595
21.189	0.575066
21.2073	0.58276
21.2257	0.600069
21.244	0.498134
21.2624	0.486595
21.2807	0.55391
21.299	0.575066
21.3174	0.494288
21.3357	0.538524
21.354	0.473132
21.3724	0.500058
21.3907	0.534677
21.4091	0.596223
21.4274	0.494288
21.4457	0.609686
21.4641	0.628919
21.4824	0.650075
21.5007	0.598146
21.5191	0.682771
21.5374	0.657768
21.5557	0.709697
21.5741	0.677001
21.5924	0.665461
21.6108	0.792399
21.6291	0.834712
21.6474	0.971266
21.6658	0.95588
21.6841	1.11936
21.7024	1.12128
21.7208	1.22706
21.7391	1.49248
21.7575	1.66365
21.7758	1.80021
21.7941	2.07332
21.8125	2.3772
21.8308	2.80802
21.8491	2.95034
21.8675	3.13498
21.8858	3.2773
21.9041	3.36
21.9225	3.24268
21.9408	3.03881
21.9592	2.73108
21.9775	2.59645
21.9958	2.20987
22.0142	1.98677
22.0325	1.87137
22.0508	1.63096
22.0692	1.45401
22.0875	1.28669
22.1059	1.24822
22.1242	1.19822
22.1425	1.10205
22.1609	1.09243
22.1792	1.05781
22.1975	1.09436
22.2159	1.09051
22.2342	1.29246
22.2525	1.42324
22.2709	1.48286
22.2892	1.61557
22.3076	1.73674
22.3259	1.57903
22.3442	1.60403
22.3626	1.4444
22.3809	1.31554
22.3992	1.25014
22.4176	1.02704
22.4359	1.00781
22.4543	0.875101
22.4726	0.798169
22.4909	0.684694
22.5093	0.659691
22.5276	0.688541
22.5459	0.590453
22.5643	0.588529
22.5826	0.528907
22.6009	0.532754
22.6193	0.490441
22.6376	0.54237
22.656	0.509674
22.6743	0.475055
22.6926	0.450052
22.711	0.459668
22.7293	0.446205
22.7476	0.415433
22.766	0.432742
22.7843	0.465438
22.8027	0.465438
22.821	0.453899
22.8393	0.436589
22.8577	0.434666
22.876	0.440435
22.8943	0.446205
22.9127	0.398123
22.931	0.415433
22.9494	0.428896
22.9677	0.371197
22.986	0.425049
23.0044	0.413509
23.0227	0.400046
23.041	0.401969
23.0594	0.415433
23.0777	0.417356
23.096	0.403893
23.1144	0.451975
23.1327	0.409663
23.1511	0.463515
23.1694	0.409663
23.1877	0.448129
23.2061	0.446205
23.2244	0.37312
23.2427	0.425049
23.2611	0.405816
23.2794	0.430819
23.2978	0.436589
23.3161	0.382736
23.3344	0.459668
23.3528	0.407739
23.3711	0.446205
23.3894	0.480825
23.4078	0.467362
23.4261	0.448129
23.4444	0.455822
23.4628	0.471208
23.4811	0.515444
23.4995	0.453899
23.5178	0.467362
23.5361	0.517367
23.5545	0.459668
23.5728	0.448129
23.5911	0.517367
23.6095	0.471208
23.6278	0.471208
23.6462	0.509674
23.6645	0.430819
23.6828	0.475055
23.7012	0.421202
23.7195	0.448129
23.7378	0.409663
23.7562	0.426972
23.7745	0.440435
23.7928	0.386583
23.8112	0.428896
23.8295	0.457745
23.8479	0.388506
23.8662	0.438512
23.8845	0.438512
23.9029	0.407739
23.9212	0.392353
23.9395	0.425049
23.9579	0.457745
23.9762	0.434666
23.9946	0.421202
24.0129	0.492365
24.0312	0.486595
24.0496	0.451975
24.0679	0.448129
24.0862	0.501981
24.1046	0.592376
24.1229	0.540447
24.1412	0.57122
24.1596	0.700081
24.1779	0.753933
24.1963	0.819325
24.2146	0.869331
24.2329	0.957803
24.2513	1.01935
24.2696	1.11167
24.2879	1.24053
24.3063	1.24053
24.3246	1.32515
24.343	1.40785
24.3613	1.31554
24.3796	1.24053
24.398	1.16744
24.4163	1.12705
24.4346	0.911644
24.453	0.942416
24.4713	0.777013
24.4897	0.644305
24.508	0.634689
24.5263	0.673155
24.5447	0.58276
24.563	0.632765
24.5813	0.540447
24.5997	0.575066
24.618	0.607762
24.6363	0.5366
24.6547	0.526984
24.673	0.617379
24.6914	0.600069
24.7097	0.57699
24.728	0.567373
24.7464	0.594299
24.7647	0.578913
24.783	0.594299
24.8014	0.598146
24.8197	0.544294
24.8381	0.519291
24.8564	0.525061
24.8747	0.494288
24.8931	0.415433
24.9114	0.455822
24.9297	0.482748
24.9481	0.421202
24.9664	0.438512
24.9847	0.371197
25.0031	0.336577
25.0214	0.328884
25.0398	0.365427
25.0581	0.382736
25.0764	0.388506
25.0948	0.363503
25.1131	0.36735
25.1314	0.37889
25.1498	0.359657
25.1681	0.36158
25.1865	0.36158
25.2048	0.346194
25.2231	0.348117
25.2415	0.298111
25.2598	0.330807
25.2781	0.300035
25.2965	0.336577
25.3148	0.284648
25.3331	0.328884
25.3515	0.334654
25.3698	0.342347
25.3882	0.332731
25.4065	0.36158
25.4248	0.357734
25.4432	0.334654
25.4615	0.298111
25.4798	0.315421
25.4982	0.325038
25.5165	0.328884
25.5349	0.35581
25.5532	0.301958
25.5715	0.363503
25.5899	0.346194
25.6082	0.321191
25.6265	0.351964
25.6449	0.357734
25.6632	0.37312
25.6815	0.386583
25.6999	0.351964
25.7182	0.432742
25.7366	0.450052
25.7549	0.469285
25.7732	0.467362
25.7916	0.473132
25.8099	0.494288
25.8282	0.515444
25.8466	0.500058
25.8649	0.463515
25.8833	0.498134
25.9016	0.494288
25.9199	0.444282
25.9383	0.405816
25.9566	0.369273
25.9749	0.386583
25.9933	0.394276
26.0116	0.353887
26.0299	0.323114
26.0483	0.307728
26.0666	0.330807
26.085	0.338501
26.1033	0.319268
26.1216	0.321191
26.14	0.313498
26.1583	0.332731
26.1766	0.336577
26.195	0.326961
26.2133	0.300035
26.2317	0.336577
26.25	0.313498
26.2683	0.311574
26.2867	0.284648
26.305	0.276955
26.3233	0.317344
26.3417	0.326961
26.36	0.319268
26.3784	0.282725
26.3967	0.292341
26.415	0.342347
26.4334	0.257722
26.4517	0.284648
26.47	0.298111
26.4884	0.315421
26.5067	0.328884
26.525	0.330807
26.5434	0.278878
26.5617	0.309651
26.5801	0.332731
26.5984	0.357734
26.6167	0.353887
26.6351	0.319268
26.6534	0.332731
26.6717	0.36158
26.6901	0.348117
26.7084	0.35581
26.7268	0.38466
26.7451	0.375043
26.7634	0.394276
26.7818	0.434666
26.8001	0.473132
26.8184	0.478901
26.8368	0.484671
26.8551	0.467362
26.8734	0.503904
26.8918	0.532754
26.9101	0.532754
26.9285	0.526984
26.9468	0.482748
26.9651	0.486595
26.9835	0.459668
27.0018	0.432742
27.0201	0.39043
27.0385	0.363503
27.0568	0.375043
27.0752	0.376967
27.0935	0.375043
27.1118	0.357734
27.1302	0.375043
27.1485	0.336577
27.1668	0.336577
27.1852	0.353887
27.2035	0.353887
27.2218	0.336577
27.2402	0.37889
27.2585	0.419279
27.2769	0.394276
27.2952	0.426972
27.3135	0.401969
27.3319	0.417356
27.3502	0.425049
27.3685	0.450052
27.3869	0.469285
27.4052	0.5366
27.4236	0.532754
27.4419	0.594299
27.4602	0.601993
27.4786	0.657768
27.4969	0.721237
27.5152	0.796246
27.5336	0.917414
27.5519	0.973189
27.5702	1.05397
27.5886	1.08089
27.6069	1.09436
27.6253	1.11359
27.6436	0.992422
27.6619	1.05012
27.6803	0.94434
27.6986	0.836635
27.7169	0.753933
27.7353	0.703927
27.7536	0.619302
27.772	0.613532
27.7903	0.588529
27.8086	0.519291
27.827	0.486595
27.8453	0.484671
27.8636	0.451975
27.882	0.425049
27.9003	0.411586
27.9187	0.3962
27.937	0.37889
27.9553	0.436589
27.9737	0.413509
27.992	0.400046
28.0103	0.353887
28.0287	0.434666
28.047	0.375043
28.0653	0.330807
28.0837	0.353887
28.102	0.319268
28.1204	0.351964
28.1387	0.35581
28.157	0.386583
28.1754	0.382736
28.1937	0.328884
28.212	0.342347
28.2304	0.330807
28.2487	0.38466
28.2671	0.35581
28.2854	0.346194
28.3037	0.3962
28.3221	0.36158
28.3404	0.423126
28.3587	0.403893
28.3771	0.407739
28.3954	0.436589
28.4137	0.501981
28.4321	0.56545
28.4504	0.596223
28.4688	0.600069
28.4871	0.667385
28.5054	0.753933
28.5238	0.805862
28.5421	0.878948
28.5604	0.978959
28.5788	1.01358
28.5971	1.06935
28.6155	1.22514
28.6338	1.05204
28.6521	1.06358
28.6705	1.04435
28.6888	0.952033
28.7071	0.844328
28.7255	0.782783
28.7438	0.72893
28.7621	0.628919
28.7805	0.590453
28.7988	0.488518
28.8172	0.455822
28.8355	0.438512
28.8538	0.461592
28.8722	0.359657
28.8905	0.394276
28.9088	0.363503
28.9272	0.317344
28.9455	0.35004
28.9639	0.319268
28.9822	0.334654
29.0005	0.323114
29.0189	0.338501
29.0372	0.280802
29.0555	0.286572
29.0739	0.276955
29.0922	0.263492
29.1105	0.275032
29.1289	0.280802
29.1472	0.317344
29.1656	0.259645
29.1839	0.271185
29.2022	0.242336
29.2206	0.276955
29.2389	0.244259
29.2572	0.276955
29.2756	0.282725
29.2939	0.271185
29.3123	0.242336
29.3306	0.269262
29.3489	0.261569
29.3673	0.263492
29.3856	0.280802
29.4039	0.323114
29.4223	0.280802
29.4406	0.278878
29.459	0.242336
29.4773	0.263492
29.4956	0.284648
29.514	0.278878
29.5323	0.280802
29.5506	0.273108
29.569	0.276955
29.5873	0.282725
29.6056	0.278878
29.624	0.288495
29.6423	0.328884
29.6607	0.307728
29.679	0.290418
29.6973	0.275032
29.7157	0.315421
29.734	0.238489
29.7523	0.334654
29.7707	0.246182
29.789	0.257722
29.8074	0.263492
29.8257	0.248106
29.844	0.309651
29.8624	0.319268
29.8807	0.309651
29.899	0.328884
29.9174	0.276955
29.9357	0.263492
29.954	0.244259
29.9724	0.286572
29.9907	0.275032
30.0091	0.232719
30.0274	0.250029
30.0457	0.282725
30.0641	0.253875
30.0824	0.263492
30.1007	0.248106
30.1191	0.205793
30.1374	0.228873
30.1558	0.253875
30.1741	0.217333
30.1924	0.219256
30.2108	0.246182
30.2291	0.275032
30.2474	0.226949
30.2658	0.232719
30.2841	0.267339
30.3024	0.226949
30.3208	0.200023
30.3391	0.219256
30.3575	0.188483
30.3758	0.217333
30.3941	0.261569
30.4125	0.211563
30.4308	0.217333
30.4491	0.234642
30.4675	0.221179
30.4858	0.201946
30.5042	0.236566
30.5225	0.215409
30.5408	0.223103
30.5592	0.194253
30.5775	0.257722
30.5958	0.20387
30.6142	0.232719
30.6325	0.280802
30.6508	0.226949
30.6692	0.253875
30.6875	0.242336
30.7059	0.250029
30.7242	0.221179
30.7425	0.217333
30.7609	0.238489
30.7792	0.244259
30.7975	0.207716
30.8159	0.259645
30.8342	0.242336
30.8526	0.313498
30.8709	0.271185
30.8892	0.280802
30.9076	0.248106
30.9259	0.271185
30.9442	0.248106
30.9626	0.236566
30.9809	0.246182
30.9992	0.263492
31.0176	0.267339
31.0359	0.259645
31.0543	0.230796
31.0726	0.248106
31.0909	0.244259
31.1093	0.244259
31.1276	0.223103
31.1459	0.219256
31.1643	0.194253
31.1826	0.230796
31.201	0.226949
31.2193	0.234642
31.2376	0.257722
31.256	0.273108
31.2743	0.261569
31.2926	0.278878
31.311	0.296188
31.3293	0.323114
31.3477	0.309651
31.366	0.35581
31.3843	0.315421
31.4027	0.357734
31.421	0.394276
31.4393	0.455822
31.4577	0.413509
31.476	0.450052
31.4943	0.432742
31.5127	0.423126
31.531	0.386583
31.5494	0.415433
31.5677	0.382736
31.586	0.323114
31.6044	0.357734
31.6227	0.334654
31.641	0.319268
31.6594	0.305805
31.6777	0.292341
31.6961	0.323114
31.7144	0.315421
31.7327	0.307728
31.7511	0.296188
31.7694	0.284648
31.7877	0.288495
31.8061	0.351964
31.8244	0.309651
31.8427	0.250029
31.8611	0.251952
31.8794	0.259645
31.8978	0.255799
31.9161	0.223103
31.9344	0.309651
31.9528	0.259645
31.9711	0.228873
31.9894	0.280802
32.0078	0.213486
32.0261	0.225026
32.0445	0.244259
32.0628	0.211563
32.0811	0.234642
32.0995	0.215409
32.1178	0.221179
32.1361	0.20964
32.1545	0.253875
32.1728	0.184637
32.1911	0.217333
32.2095	0.213486
32.2278	0.207716
32.2462	0.207716
32.2645	0.221179
32.2828	0.207716
32.3012	0.200023
32.3195	0.182713
32.3378	0.18656
32.3562	0.190407
32.3745	0.232719
32.3929	0.251952
32.4112	0.211563
32.4295	0.244259
32.4479	0.225026
32.4662	0.248106
32.4845	0.246182
32.5029	0.223103
32.5212	0.240412
32.5395	0.230796
32.5579	0.253875
32.5762	0.284648
32.5946	0.232719
32.6129	0.244259
32.6312	0.230796
32.6496	0.296188
32.6679	0.257722
32.6862	0.303881
32.7046	0.315421
32.7229	0.284648
32.7413	0.257722
32.7596	0.253875
32.7779	0.261569
32.7963	0.240412
32.8146	0.244259
32.8329	0.263492
32.8513	0.221179
32.8696	0.251952
32.888	0.234642
32.9063	0.253875
32.9246	0.205793
32.943	0.200023
32.9613	0.255799
32.9796	0.19233
32.998	0.19233
33.0163	0.242336
33.0346	0.221179
33.053	0.242336
33.0713	0.213486
33.0897	0.228873
33.108	0.230796
33.1263	0.225026
33.1447	0.259645
33.163	0.257722
33.1813	0.226949
33.1997	0.196176
33.218	0.178867
33.2364	0.201946
33.2547	0.215409
33.273	0.228873
33.2914	0.221179
33.3097	0.253875
33.328	0.228873
33.3464	0.225026
33.3647	0.182713
33.383	0.228873
33.4014	0.230796
33.4197	0.205793
33.4381	0.225026
33.4564	0.207716
33.4747	0.213486
33.4931	0.223103
33.5114	0.194253
33.5297	0.223103
33.5481	0.18656
33.5664	0.205793
33.5848	0.20964
33.6031	0.207716
33.6214	0.205793
33.6398	0.207716
33.6581	0.221179
33.6764	0.240412
33.6948	0.215409
33.7131	0.200023
33.7314	0.20964
33.7498	0.230796
33.7681	0.250029
33.7865	0.234642
33.8048	0.273108
33.8231	0.223103
33.8415	0.223103
33.8598	0.303881
33.8781	0.305805
33.8965	0.319268
33.9148	0.284648
33.9332	0.300035
33.9515	0.380813
33.9698	0.403893
33.9882	0.405816
34.0065	0.430819
34.0248	0.494288
34.0432	0.551987
34.0615	0.609686
34.0798	0.561603
34.0982	0.646228
34.1165	0.655845
34.1349	0.665461
34.1532	0.611609
34.1715	0.607762
34.1899	0.557757
34.2082	0.557757
34.2265	0.473132
34.2449	0.463515
34.2632	0.407739
34.2816	0.394276
34.2999	0.336577
34.3182	0.309651
34.3366	0.271185
34.3549	0.294265
34.3732	0.273108
34.3916	0.288495
34.4099	0.259645
34.4282	0.269262
34.4466	0.19233
34.4649	0.248106
34.4833	0.219256
34.5016	0.238489
34.5199	0.1981
34.5383	0.207716
34.5566	0.219256
34.5749	0.219256
34.5933	0.176943
34.6116	0.201946
34.63	0.219256
34.6483	0.238489
34.6666	0.223103
34.685	0.176943
34.7033	0.176943
34.7216	0.205793
34.74	0.196176
34.7583	0.178867
34.7767	0.182713
34.795	0.17502
34.8133	0.207716
34.8317	0.226949
34.85	0.219256
34.8683	0.211563
34.8867	0.200023
34.905	0.200023
34.9233	0.196176
34.9417	0.221179
34.96	0.16925
34.9784	0.159634
34.9967	0.20964
35.015	0.184637
35.0334	0.219256
35.0517	0.213486
35.07	0.196176
35.0884	0.225026
35.1067	0.213486
35.1251	0.176943
35.1434	0.211563
35.1617	0.211563
35.1801	0.184637
35.1984	0.1981
35.2167	0.18079
35.2351	0.225026
35.2534	0.226949
35.2717	0.20387
35.2901	0.201946
35.3084	0.217333
35.3268	0.207716
35.3451	0.215409
35.3634	0.226949
35.3818	0.250029
35.4001	0.211563
35.4184	0.253875
35.4368	0.223103
35.4551	0.18079
35.4735	0.257722
35.4918	0.250029
35.5101	0.265415
35.5285	0.226949
35.5468	0.236566
35.5651	0.275032
35.5835	0.301958
35.6018	0.284648
35.6201	0.300035
35.6385	0.321191
35.6568	0.292341
35.6752	0.323114
35.6935	0.35004
35.7118	0.388506
35.7302	0.430819
35.7485	0.459668
35.7668	0.463515
35.7852	0.478901
35.8035	0.450052
35.8219	0.498134
35.8402	0.37889
35.8585	0.421202
35.8769	0.36735
35.8952	0.340424
35.9135	0.340424
35.9319	0.303881
35.9502	0.340424
35.9685	0.309651
35.9869	0.280802
36.0052	0.284648
36.0236	0.226949
36.0419	0.309651
36.0602	0.317344
36.0786	0.263492
36.0969	0.261569
36.1152	0.300035
36.1336	0.248106
36.1519	0.261569
36.1703	0.234642
36.1886	0.251952
36.2069	0.215409
36.2253	0.242336
36.2436	0.20387
36.2619	0.248106
36.2803	0.20964
36.2986	0.219256
36.317	0.236566
36.3353	0.18656
36.3536	0.184637
36.372	0.200023
36.3903	0.219256
36.4086	0.238489
36.427	0.200023
36.4453	0.223103
36.4636	0.194253
36.482	0.190407
36.5003	0.161557
36.5187	0.178867
36.537	0.232719
36.5553	0.190407
36.5737	0.205793
36.592	0.16348
36.6103	0.190407
36.6287	0.20387
36.647	0.190407
36.6654	0.190407
36.6837	0.188483
36.702	0.184637
36.7204	0.217333
36.7387	0.176943
36.757	0.17502
36.7754	0.257722
36.7937	0.232719
36.812	0.240412
36.8304	0.223103
36.8487	0.226949
36.8671	0.240412
36.8854	0.211563
36.9037	0.205793
36.9221	0.213486
36.9404	0.221179
36.9587	0.184637
36.9771	0.238489
36.9954	0.217333
37.0138	0.200023
37.0321	0.196176
37.0504	0.201946
37.0688	0.196176
37.0871	0.196176
37.1054	0.20964
37.1238	0.176943
37.1421	0.140401
37.1604	0.159634
37.1788	0.18656
37.1971	0.1981
37.2155	0.211563
37.2338	0.16925
37.2521	0.194253
37.2705	0.173097
37.2888	0.194253
37.3071	0.171174
37.3255	0.17502
37.3438	0.125014
37.3622	0.190407
37.3805	0.19233
37.3988	0.190407
37.4172	0.16925
37.4355	0.18656
37.4538	0.190407
37.4722	0.153864
37.4905	0.16925
37.5088	0.159634
37.5272	0.173097
37.5455	0.171174
37.5639	0.1981
37.5822	0.16925
37.6005	0.188483
37.6189	0.178867
37.6372	0.225026
37.6555	0.17502
37.6739	0.157711
37.6922	0.155787
37.7106	0.188483
37.7289	0.184637
37.7472	0.188483
37.7656	0.176943
37.7839	0.17502
37.8022	0.18656
37.8206	0.213486
37.8389	0.171174
37.8573	0.171174
37.8756	0.1981
37.8939	0.207716
37.9123	0.20387
37.9306	0.157711
37.9489	0.18079
37.9673	0.178867
37.9856	0.151941
38.0039	0.167327
38.0223	0.176943
38.0406	0.188483
38.059	0.19233
38.0773	0.17502
38.0956	0.17502
38.114	0.176943
38.1323	0.165404
38.1506	0.178867
38.169	0.184637
38.1873	0.194253
38.2057	0.18079
38.224	0.188483
38.2423	0.184637
38.2607	0.207716
38.279	0.17502
38.2973	0.159634
38.3157	0.194253
38.334	0.167327
38.3523	0.176943
38.3707	0.20387
38.389	0.207716
38.4074	0.18079
38.4257	0.18079
38.444	0.16348
38.4624	0.161557
38.4807	0.19233
38.499	0.184637
38.5174	0.16348
38.5357	0.200023
38.5541	0.161557
38.5724	0.16925
38.5907	0.217333
38.6091	0.16925
38.6274	0.190407
38.6457	0.182713
38.6641	0.182713
38.6824	0.19233
38.7007	0.196176
38.7191	0.150017
38.7374	0.178867
38.7558	0.176943
38.7741	0.213486
38.7924	0.146171
38.8108	0.171174
38.8291	0.219256
38.8474	0.226949
38.8658	0.190407
38.8841	0.176943
38.9025	0.201946
38.9208	0.215409
38.9391	0.18079
38.9575	0.182713
38.9758	0.219256
38.9941	0.228873
39.0125	0.18656
39.0308	0.201946
39.0491	0.221179
39.0675	0.251952
39.0858	0.261569
39.1042	0.211563
39.1225	0.271185
39.1408	0.242336
39.1592	0.228873
39.1775	0.228873
39.1958	0.238489
39.2142	0.228873
39.2325	0.257722
39.2509	0.257722
39.2692	0.238489
39.2875	0.240412
39.3059	0.228873
39.3242	0.221179
39.3425	0.242336
39.3609	0.17502
39.3792	0.221179
39.3975	0.182713
39.4159	0.236566
39.4342	0.226949
39.4526	0.161557
39.4709	0.213486
39.4892	0.20387
39.5076	0.188483
39.5259	0.184637
39.5442	0.201946
39.5626	0.167327
39.5809	0.207716
39.5993	0.217333
39.6176	0.217333
39.6359	0.196176
39.6543	0.213486
39.6726	0.215409
39.6909	0.225026
39.7093	0.18656
39.7276	0.201946
39.746	0.255799
39.7643	0.244259
39.7826	0.271185
39.801	0.300035
39.8193	0.261569
39.8376	0.309651
39.856	0.242336
39.8743	0.35004
39.8926	0.317344
39.911	0.375043
39.9293	0.35581
39.9477	0.328884
39.966	0.298111
39.9843	0.284648
40.0027	0.309651
40.021	0.288495
40.0393	0.303881
40.0577	0.257722
40.076	0.251952
40.0944	0.267339
40.1127	0.226949
40.131	0.234642
40.1494	0.234642
40.1677	0.207716
40.186	0.200023
40.2044	0.194253
40.2227	0.184637
40.241	0.219256
40.2594	0.221179
40.2777	0.232719
40.2961	0.263492
40.3144	0.213486
40.3327	0.242336
40.3511	0.19233
40.3694	0.219256
40.3877	0.236566
40.4061	0.248106
40.4244	0.225026
40.4428	0.232719
40.4611	0.219256
40.4794	0.201946
40.4978	0.217333
40.5161	0.257722
40.5344	0.201946
[truncated: 1,056 more rows]

## Sheet: Heating 95 °C
2theta	Intensity
3.89731	1.42901
3.91565	1.329
3.93399	1.41362
3.95232	1.36554
3.97066	1.45978
3.989	1.44055
4.00733	1.54826
4.02567	1.45017
4.04401	1.45594
4.06234	1.48479
4.08068	1.47709
4.09902	1.34631
4.11735	1.40208
4.13569	1.4944
4.15403	1.40401
4.17237	1.35208
4.1907	1.40785
4.20904	1.32323
4.22738	1.37901
4.24571	1.30207
4.26405	1.33285
4.28239	1.26938
4.30072	1.44824
4.31906	1.14821
4.3374	1.34823
4.35573	1.35593
4.37407	1.33862
4.39241	1.36554
4.41075	1.28284
4.42908	1.28476
4.44742	1.34246
4.46576	1.31746
4.48409	1.354
4.50243	1.32131
4.52077	1.35208
4.5391	1.29823
4.55744	1.31169
4.57578	1.31938
4.59411	1.35016
4.61245	1.354
4.63079	1.24053
4.64913	1.2386
4.66746	1.25399
4.6858	1.28284
4.70414	1.27707
4.72247	1.19245
4.74081	1.24245
4.75915	1.26361
4.77748	1.1886
4.79582	1.17129
4.81416	1.29438
4.83249	1.19245
4.85083	1.25784
4.86917	1.15975
4.8875	1.22514
4.90584	1.21937
4.92418	1.2963
4.94252	1.16552
4.96085	1.24245
4.97919	1.15398
4.99753	1.15013
5.01586	1.23283
5.0342	1.1636
5.05254	1.0982
5.07087	1.14244
5.08921	1.1886
5.10755	1.08859
5.12588	1.11167
5.14422	1.11359
5.16256	1.09051
5.1809	1.24053
5.19923	1.12513
5.21757	1.09051
5.23591	1.20399
5.25424	1.13667
5.27258	1.17514
5.29092	1.11744
5.30925	1.09628
5.32759	1.13475
5.34593	1.11551
5.36426	1.06551
5.3826	1.08666
5.40094	1.08089
5.41927	1.10013
5.43761	1.12128
5.45595	1.13282
5.47429	1.12898
5.49262	1.08089
5.51096	1.11744
5.5293	1.04435
5.54763	1.1059
5.56597	1.04243
5.58431	1.11744
5.60264	1.07897
5.62098	1.11936
5.63932	1.05397
5.65765	1.15398
5.67599	1.11359
5.69433	1.06935
5.71267	1.13282
5.731	1.11744
5.74934	1.07705
5.76768	1.08666
5.78601	1.13475
5.80435	1.08282
5.82269	1.04243
5.84102	1.17898
5.85936	1.12321
5.8777	1.15206
5.89603	1.25591
5.91437	1.18283
5.93271	1.23668
5.95104	1.18283
5.96938	1.25207
5.98772	1.2136
6.00606	1.13859
6.02439	1.13282
6.04273	1.26553
6.06107	1.27707
6.0794	1.29053
6.09774	1.33669
6.11608	1.33285
6.13441	1.29246
6.15275	1.40593
6.17109	1.43286
6.18942	1.38285
6.20776	1.61172
6.2261	1.57518
6.24444	1.53287
6.26277	1.57711
6.28111	1.67712
6.29945	1.67904
6.31778	1.80021
6.33612	1.87137
6.35446	1.86175
6.37279	1.85214
6.39113	1.88676
6.40947	2.07524
6.4278	2.05601
6.44614	2.29257
6.46448	2.2945
6.48282	2.24834
6.50115	2.45028
6.51949	2.52529
6.53783	2.76955
6.55616	2.73878
6.5745	3.03497
6.59284	3.32923
6.61117	3.31769
6.62951	3.51771
6.64785	3.94084
6.66618	4.09278
6.68452	4.34666
6.70286	4.56591
6.72119	4.82363
6.73953	5.14867
6.75787	5.26792
6.77621	5.72758
6.79454	6.36997
6.81288	6.68539
6.83122	7.16044
6.84955	7.81244
6.86789	8.17402
6.88623	9.12605
6.90456	9.74151
6.9229	10.8186
6.94124	11.7456
6.95957	13.0592
6.97791	13.9401
6.99625	15.046
7.01459	16.6654
7.03292	18.3906
7.05126	20.2235
7.0696	21.8737
7.08793	24.0624
7.10627	26.4646
7.12461	28.7302
7.14294	32.1479
7.16128	35.2925
7.17962	39.1757
7.19795	43.9608
7.21629	49.096
7.23463	55.516
7.25296	63.4342
7.2713	72.8738
7.28964	84.2693
7.30798	97.1151
7.32631	111.636
7.34465	126.863
7.36299	139.591
7.38132	144.396
7.39966	135.929
7.418	114.138
7.43633	89.5026
7.45467	67.4482
7.47301	48.1152
7.49134	34.3001
7.50968	24.7567
7.52802	19.3118
7.54636	15.3248
7.56469	11.5821
7.58303	8.59715
7.60137	6.12763
7.6197	4.689
7.63804	3.76582
7.65638	3.06766
7.67471	2.75224
7.69305	2.36373
7.71139	2.21949
7.72972	2.11178
7.74806	1.87522
7.7664	1.84637
7.78473	1.8406
7.80307	1.55403
7.82141	1.57134
7.83975	1.45594
7.85808	1.40978
7.87642	1.34246
7.89476	1.22129
7.91309	1.24053
7.93143	1.21937
7.94977	1.1559
7.9681	1.1559
7.98644	1.0982
8.00478	1.03666
8.02311	0.965496
8.04145	0.984729
8.05979	0.959726
8.07813	0.969343
8.09646	0.878948
8.1148	0.93857
8.13314	0.965496
8.15147	0.834712
8.16981	0.846251
8.18815	0.777013
8.20648	0.846251
8.22482	0.775089
8.24316	0.853945
8.26149	0.830865
8.27983	0.771243
8.29817	0.684694
8.3165	0.817402
8.33484	0.780859
8.35318	0.736623
8.37152	0.690464
8.38985	0.707774
8.40819	0.667385
8.42653	0.659691
8.44486	0.715467
8.4632	0.705851
8.48154	0.686618
8.49987	0.700081
8.51821	0.661615
8.53655	0.694311
8.55488	0.653922
8.57322	0.667385
8.59156	0.638535
8.6099	0.696234
8.62823	0.603916
8.64657	0.628919
8.66491	0.621226
8.68324	0.634689
8.70158	0.600069
8.71992	0.692388
8.73825	0.619302
8.75659	0.56545
8.77493	0.628919
8.79326	0.601993
8.8116	0.632765
8.82994	0.578913
8.84828	0.605839
8.86661	0.590453
8.88495	0.57699
8.90329	0.640459
8.92162	0.56545
8.93996	0.58276
8.9583	0.603916
8.97663	0.54814
8.99497	0.600069
9.01331	0.550063
9.03164	0.509674
9.04998	0.544294
9.06832	0.509674
9.08665	0.578913
9.10499	0.513521
9.12333	0.551987
9.14167	0.515444
9.16	0.605839
9.17834	0.550063
9.19668	0.555833
9.21501	0.532754
9.23335	0.500058
9.25169	0.544294
9.27002	0.563527
9.28836	0.486595
9.3067	0.492365
9.32503	0.569296
9.34337	0.515444
9.36171	0.546217
9.38005	0.475055
9.39838	0.509674
9.41672	0.532754
9.43506	0.480825
9.45339	0.546217
9.47173	0.492365
9.49007	0.525061
9.5084	0.503904
9.52674	0.475055
9.54508	0.494288
9.56341	0.505828
9.58175	0.503904
9.60009	0.501981
9.61842	0.450052
9.63676	0.507751
9.6551	0.475055
9.67344	0.490441
9.69177	0.484671
9.71011	0.484671
9.72845	0.473132
9.74678	0.451975
9.76512	0.459668
9.78346	0.453899
9.80179	0.436589
9.82013	0.442359
9.83847	0.513521
9.8568	0.53083
9.87514	0.500058
9.89348	0.448129
9.91182	0.448129
9.93015	0.488518
9.94849	0.488518
9.96683	0.482748
9.98516	0.450052
10.0035	0.473132
10.0218	0.476978
10.0402	0.476978
10.0585	0.482748
10.0768	0.496211
10.0952	0.415433
10.1135	0.475055
10.1319	0.526984
10.1502	0.498134
10.1685	0.434666
10.1869	0.448129
10.2052	0.417356
10.2235	0.467362
10.2419	0.426972
10.2602	0.451975
10.2786	0.469285
10.2969	0.453899
10.3152	0.496211
10.3336	0.461592
10.3519	0.430819
10.3702	0.442359
10.3886	0.451975
10.4069	0.471208
10.4252	0.453899
10.4436	0.444282
10.4619	0.450052
10.4803	0.400046
10.4986	0.409663
10.5169	0.459668
10.5353	0.417356
10.5536	0.37889
10.5719	0.442359
10.5903	0.432742
10.6086	0.451975
10.627	0.442359
10.6453	0.419279
10.6636	0.423126
10.682	0.415433
10.7003	0.469285
10.7186	0.432742
10.737	0.434666
10.7553	0.425049
10.7736	0.465438
10.792	0.403893
10.8103	0.436589
10.8287	0.375043
10.847	0.407739
10.8653	0.426972
10.8837	0.415433
10.902	0.369273
10.9203	0.428896
10.9387	0.440435
10.957	0.39043
10.9754	0.415433
10.9937	0.461592
11.012	0.417356
11.0304	0.432742
11.0487	0.392353
11.067	0.419279
11.0854	0.403893
11.1037	0.417356
11.1221	0.37889
11.1404	0.426972
11.1587	0.409663
11.1771	0.401969
11.1954	0.371197
11.2137	0.421202
11.2321	0.411586
11.2504	0.411586
11.2687	0.428896
11.2871	0.365427
11.3054	0.436589
11.3238	0.417356
11.3421	0.417356
11.3604	0.425049
11.3788	0.382736
11.3971	0.413509
11.4154	0.442359
11.4338	0.369273
11.4521	0.403893
11.4705	0.394276
11.4888	0.403893
11.5071	0.398123
11.5255	0.39043
11.5438	0.37889
11.5621	0.38466
11.5805	0.405816
11.5988	0.426972
11.6171	0.482748
11.6355	0.461592
11.6538	0.388506
11.6722	0.430819
11.6905	0.463515
11.7088	0.430819
11.7272	0.357734
11.7455	0.359657
11.7638	0.371197
11.7822	0.369273
11.8005	0.419279
11.8189	0.371197
11.8372	0.398123
11.8555	0.38466
11.8739	0.421202
11.8922	0.394276
11.9105	0.398123
11.9289	0.426972
11.9472	0.398123
11.9655	0.342347
11.9839	0.425049
12.0022	0.363503
12.0206	0.398123
12.0389	0.376967
12.0572	0.405816
12.0756	0.438512
12.0939	0.382736
12.1122	0.398123
12.1306	0.376967
12.1489	0.440435
12.1673	0.446205
12.1856	0.39043
12.2039	0.407739
12.2223	0.398123
12.2406	0.432742
12.2589	0.442359
12.2773	0.415433
12.2956	0.3962
12.3139	0.425049
12.3323	0.473132
12.3506	0.444282
12.369	0.471208
12.3873	0.476978
12.4056	0.484671
12.424	0.463515
12.4423	0.505828
12.4606	0.486595
12.479	0.550063
12.4973	0.580836
12.5157	0.563527
12.534	0.630842
12.5523	0.657768
12.5707	0.692388
12.589	0.74047
12.6073	0.76932
12.6257	0.880871
12.644	0.975113
12.6624	1.12898
12.6807	1.21552
12.699	1.44247
12.7174	1.67904
12.7357	2.031
12.754	2.1214
12.7724	2.31373
12.7907	2.42913
12.809	2.47529
12.8274	2.29257
12.8457	1.95215
12.8641	1.56364
12.8824	1.10397
12.9007	0.900104
12.9191	0.705851
12.9374	0.632765
12.9557	0.496211
12.9741	0.540447
12.9924	0.494288
13.0108	0.451975
13.0291	0.426972
13.0474	0.438512
13.0658	0.419279
13.0841	0.403893
13.1024	0.398123
13.1208	0.403893
13.1391	0.401969
13.1574	0.400046
13.1758	0.369273
13.1941	0.419279
13.2125	0.371197
13.2308	0.332731
13.2491	0.36735
13.2675	0.371197
13.2858	0.298111
13.3041	0.407739
13.3225	0.39043
13.3408	0.38466
13.3592	0.336577
13.3775	0.382736
13.3958	0.351964
13.4142	0.369273
13.4325	0.346194
13.4508	0.380813
13.4692	0.363503
13.4875	0.330807
13.5058	0.365427
13.5242	0.309651
13.5425	0.382736
13.5609	0.388506
13.5792	0.34427
13.5975	0.357734
13.6159	0.348117
13.6342	0.357734
13.6525	0.296188
13.6709	0.407739
13.6892	0.342347
13.7076	0.375043
13.7259	0.313498
13.7442	0.365427
13.7626	0.39043
13.7809	0.394276
13.7992	0.340424
13.8176	0.357734
13.8359	0.38466
13.8542	0.357734
13.8726	0.334654
13.8909	0.346194
13.9093	0.380813
13.9276	0.317344
13.9459	0.35581
13.9643	0.332731
13.9826	0.34427
14.0009	0.35581
14.0193	0.405816
14.0376	0.380813
14.056	0.388506
14.0743	0.37889
14.0926	0.336577
14.111	0.332731
14.1293	0.340424
14.1476	0.386583
14.166	0.326961
14.1843	0.359657
14.2026	0.35004
14.221	0.394276
14.2393	0.315421
14.2577	0.394276
14.276	0.326961
14.2943	0.369273
14.3127	0.336577
14.331	0.330807
14.3493	0.334654
14.3677	0.400046
14.386	0.342347
14.4044	0.336577
14.4227	0.334654
14.441	0.37889
14.4594	0.401969
14.4777	0.35581
14.496	0.409663
14.5144	0.326961
14.5327	0.371197
14.5511	0.380813
14.5694	0.432742
14.5877	0.376967
14.6061	0.37312
14.6244	0.409663
14.6427	0.369273
14.6611	0.480825
14.6794	0.461592
14.6977	0.438512
14.7161	0.459668
14.7344	0.463515
14.7528	0.394276
14.7711	0.478901
14.7894	0.436589
14.8078	0.473132
14.8261	0.417356
14.8444	0.38466
14.8628	0.392353
14.8811	0.365427
14.8995	0.403893
14.9178	0.309651
14.9361	0.382736
14.9545	0.415433
14.9728	0.307728
14.9911	0.336577
15.0095	0.359657
15.0278	0.369273
15.0461	0.380813
15.0645	0.307728
15.0828	0.328884
15.1012	0.323114
15.1195	0.325038
15.1378	0.382736
15.1562	0.330807
15.1745	0.346194
15.1928	0.34427
15.2112	0.300035
15.2295	0.303881
15.2479	0.321191
15.2662	0.315421
15.2845	0.369273
15.3029	0.369273
15.3212	0.376967
15.3395	0.328884
15.3579	0.317344
15.3762	0.419279
15.3945	0.336577
15.4129	0.371197
15.4312	0.369273
15.4496	0.375043
15.4679	0.284648
15.4862	0.363503
15.5046	0.357734
15.5229	0.332731
15.5412	0.313498
15.5596	0.334654
15.5779	0.35581
15.5963	0.346194
15.6146	0.371197
15.6329	0.34427
15.6513	0.380813
15.6696	0.401969
15.6879	0.388506
15.7063	0.394276
15.7246	0.386583
15.7429	0.425049
15.7613	0.428896
15.7796	0.357734
15.798	0.478901
15.8163	0.446205
15.8346	0.55391
15.853	0.492365
15.8713	0.54814
15.8896	0.57122
15.908	0.534677
15.9263	0.598146
15.9447	0.650075
15.963	0.638535
15.9813	0.696234
15.9997	0.653922
16.018	0.75778
16.0363	0.703927
16.0547	0.696234
16.073	0.642382
16.0914	0.56545
16.1097	0.551987
16.128	0.594299
16.1464	0.463515
16.1647	0.532754
16.183	0.453899
16.2014	0.3962
16.2197	0.39043
16.238	0.438512
16.2564	0.430819
16.2747	0.357734
16.2931	0.363503
16.3114	0.37889
16.3297	0.39043
16.3481	0.357734
16.3664	0.351964
16.3847	0.332731
16.4031	0.351964
16.4214	0.36158
16.4398	0.325038
16.4581	0.334654
16.4764	0.340424
16.4948	0.409663
16.5131	0.328884
16.5314	0.409663
16.5498	0.382736
16.5681	0.35004
16.5864	0.371197
16.6048	0.330807
16.6231	0.36158
16.6415	0.319268
16.6598	0.313498
16.6781	0.37312
16.6965	0.340424
16.7148	0.35581
16.7331	0.346194
16.7515	0.340424
16.7698	0.35581
16.7882	0.321191
16.8065	0.300035
16.8248	0.380813
16.8432	0.346194
16.8615	0.35004
16.8798	0.342347
16.8982	0.357734
16.9165	0.342347
16.9348	0.34427
16.9532	0.34427
16.9715	0.326961
16.9899	0.375043
17.0082	0.35581
17.0265	0.35581
17.0449	0.34427
17.0632	0.37312
17.0815	0.334654
17.0999	0.371197
17.1182	0.39043
17.1366	0.365427
17.1549	0.376967
17.1732	0.326961
17.1916	0.303881
17.2099	0.346194
17.2282	0.388506
17.2466	0.348117
17.2649	0.380813
17.2832	0.403893
17.3016	0.371197
17.3199	0.440435
17.3383	0.3962
17.3566	0.369273
17.3749	0.36735
17.3933	0.448129
17.4116	0.426972
17.4299	0.405816
17.4483	0.465438
17.4666	0.496211
17.485	0.463515
17.5033	0.532754
17.5216	0.54237
17.54	0.5366
17.5583	0.55968
17.5766	0.607762
17.595	0.632765
17.6133	0.707774
17.6316	0.748163
17.65	0.7347
17.6683	0.794322
17.6867	0.744317
17.705	0.698157
17.7233	0.628919
17.7417	0.659691
17.76	0.55391
17.7783	0.569296
17.7967	0.526984
17.815	0.498134
17.8334	0.496211
17.8517	0.405816
17.87	0.434666
17.8884	0.467362
17.9067	0.475055
17.925	0.428896
17.9434	0.436589
17.9617	0.444282
17.9801	0.421202
17.9984	0.488518
18.0167	0.3962
18.0351	0.421202
18.0534	0.459668
18.0717	0.463515
18.0901	0.438512
18.1084	0.444282
18.1267	0.432742
18.1451	0.425049
18.1634	0.465438
18.1818	0.409663
18.2001	0.446205
18.2184	0.440435
18.2368	0.444282
18.2551	0.488518
18.2734	0.436589
18.2918	0.382736
18.3101	0.401969
18.3285	0.417356
18.3468	0.450052
18.3651	0.448129
18.3835	0.369273
18.4018	0.394276
18.4201	0.426972
18.4385	0.403893
18.4568	0.411586
18.4751	0.425049
18.4935	0.37312
18.5118	0.401969
18.5302	0.400046
18.5485	0.440435
18.5668	0.413509
18.5852	0.421202
18.6035	0.380813
18.6218	0.450052
18.6402	0.446205
18.6585	0.448129
18.6769	0.446205
18.6952	0.484671
18.7135	0.442359
18.7319	0.386583
18.7502	0.438512
18.7685	0.461592
18.7869	0.392353
18.8052	0.450052
18.8235	0.473132
18.8419	0.403893
18.8602	0.453899
18.8786	0.478901
18.8969	0.501981
18.9152	0.467362
18.9336	0.475055
18.9519	0.488518
18.9702	0.475055
18.9886	0.442359
19.0069	0.486595
19.0253	0.526984
19.0436	0.471208
19.0619	0.511597
19.0803	0.555833
19.0986	0.513521
19.1169	0.532754
19.1353	0.546217
19.1536	0.55968
19.1719	0.653922
19.1903	0.646228
19.2086	0.707774
19.227	0.744317
19.2453	0.715467
19.2636	0.748163
19.282	0.792399
19.3003	0.878948
19.3186	0.830865
19.337	0.953956
19.3553	1.06743
19.3737	1.15206
19.392	1.34823
19.4103	1.54249
19.4287	1.71558
19.447	2.04831
19.4653	2.2618
19.4837	2.79071
19.502	3.4254
19.5204	4.30242
19.5387	5.09674
19.557	6.20841
19.5754	7.0989
19.5937	8.03747
19.612	8.89141
19.6304	8.72985
19.6487	8.24518
19.667	6.88733
19.6854	5.75643
19.7037	4.49475
19.7221	3.34462
19.7404	2.47529
19.7587	2.06755
19.7771	1.71366
19.7954	1.42709
19.8137	1.09628
19.8321	1.05589
19.8504	0.952033
19.8688	0.825095
19.8871	0.853945
19.9054	0.786629
19.9238	0.707774
19.9421	0.71739
19.9604	0.594299
19.9788	0.638535
19.9971	0.603916
20.0154	0.617379
20.0338	0.594299
20.0521	0.517367
20.0705	0.567373
20.0888	0.567373
20.1071	0.498134
20.1255	0.557757
20.1438	0.465438
20.1621	0.515444
20.1805	0.500058
20.1988	0.515444
20.2172	0.507751
20.2355	0.488518
20.2538	0.438512
20.2722	0.465438
20.2905	0.500058
20.3088	0.519291
20.3272	0.478901
20.3455	0.482748
20.3638	0.526984
20.3822	0.509674
20.4005	0.486595
20.4189	0.471208
20.4372	0.488518
20.4555	0.430819
20.4739	0.513521
20.4922	0.448129
20.5105	0.505828
20.5289	0.523137
20.5472	0.517367
20.5656	0.511597
20.5839	0.448129
20.6022	0.486595
20.6206	0.517367
20.6389	0.480825
20.6572	0.484671
20.6756	0.561603
20.6939	0.453899
20.7122	0.486595
20.7306	0.507751
20.7489	0.434666
20.7673	0.438512
20.7856	0.517367
20.8039	0.467362
20.8223	0.5366
20.8406	0.540447
20.8589	0.54814
20.8773	0.573143
20.8956	0.534677
20.914	0.513521
20.9323	0.546217
20.9506	0.584683
20.969	0.630842
20.9873	0.621226
21.0056	0.617379
21.024	0.594299
21.0423	0.609686
21.0607	0.613532
21.079	0.569296
21.0973	0.634689
21.1157	0.588529
21.134	0.534677
21.1523	0.600069
21.1707	0.525061
21.189	0.525061
21.2073	0.546217
21.2257	0.467362
21.244	0.521214
21.2624	0.532754
21.2807	0.534677
21.299	0.55391
21.3174	0.455822
21.3357	0.515444
21.354	0.592376
21.3724	0.525061
21.3907	0.501981
21.4091	0.563527
21.4274	0.584683
21.4457	0.586606
21.4641	0.567373
21.4824	0.648152
21.5007	0.700081
21.5191	0.657768
21.5374	0.700081
21.5557	0.7347
21.5741	0.805862
21.5924	0.842405
21.6108	0.923183
21.6291	0.917414
21.6474	0.946263
21.6658	1.05204
21.6841	1.23283
21.7024	1.38478
21.7208	1.5598
21.7391	1.74443
21.7575	2.02331
21.7758	2.16948
21.7941	2.40605
21.8125	2.79455
21.8308	2.90418
21.8491	3.15229
21.8675	3.34077
21.8858	3.13305
21.9041	3.12921
21.9225	2.9965
21.9408	2.58107
21.9592	2.32719
21.9775	2.11563
21.9958	1.8406
22.0142	1.7002
22.0325	1.53864
22.0508	1.38093
22.0692	1.31361
22.0875	1.15206
22.1059	1.09243
22.1242	1.06166
22.1425	1.11744
22.1609	1.05589
22.1792	1.19245
22.1975	1.26553
22.2159	1.32515
22.2342	1.41939
22.2525	1.52325
22.2709	1.66558
22.2892	1.7002
22.3076	1.50017
22.3259	1.49248
22.3442	1.41555
22.3626	1.22899
22.3809	1.1636
22.3992	0.973189
22.4176	0.913567
22.4359	0.782783
22.4543	0.759703
22.4726	0.700081
22.4909	0.678924
22.5093	0.703927
22.5276	0.605839
22.5459	0.588529
22.5643	0.561603
22.5826	0.492365
22.6009	0.509674
22.6193	0.469285
22.6376	0.592376
22.656	0.498134
22.6743	0.500058
22.6926	0.434666
22.711	0.467362
22.7293	0.436589
22.7476	0.515444
22.766	0.492365
22.7843	0.440435
22.8027	0.451975
22.821	0.421202
22.8393	0.471208
22.8577	0.463515
22.876	0.428896
22.8943	0.376967
22.9127	0.400046
22.931	0.425049
22.9494	0.405816
22.9677	0.400046
22.986	0.411586
23.0044	0.446205
23.0227	0.425049
23.041	0.39043
23.0594	0.440435
23.0777	0.405816
23.096	0.411586
23.1144	0.419279
23.1327	0.37889
23.1511	0.451975
23.1694	0.413509
23.1877	0.438512
23.2061	0.455822
23.2244	0.388506
23.2427	0.442359
23.2611	0.425049
23.2794	0.419279
23.2978	0.469285
23.3161	0.471208
23.3344	0.475055
23.3528	0.455822
23.3711	0.428896
23.3894	0.376967
23.4078	0.451975
23.4261	0.480825
23.4444	0.457745
23.4628	0.421202
23.4811	0.509674
23.4995	0.467362
23.5178	0.505828
23.5361	0.444282
23.5545	0.425049
23.5728	0.57122
23.5911	0.494288
23.6095	0.442359
23.6278	0.425049
23.6462	0.482748
23.6645	0.403893
23.6828	0.467362
23.7012	0.376967
23.7195	0.415433
23.7378	0.432742
23.7562	0.405816
23.7745	0.453899
23.7928	0.423126
23.8112	0.394276
23.8295	0.371197
23.8479	0.450052
23.8662	0.407739
23.8845	0.394276
23.9029	0.446205
23.9212	0.428896
23.9395	0.421202
23.9579	0.463515
23.9762	0.446205
23.9946	0.513521
24.0129	0.523137
24.0312	0.494288
24.0496	0.482748
24.0679	0.54237
24.0862	0.555833
24.1046	0.586606
24.1229	0.636612
24.1412	0.688541
24.1596	0.742393
24.1779	0.917414
24.1963	0.911644
24.2146	0.928953
24.2329	1.14052
24.2513	1.11936
24.2696	1.14629
24.2879	1.28476
24.3063	1.304
24.3246	1.31938
24.343	1.20399
24.3613	1.17898
24.3796	1.04627
24.398	1.0155
24.4163	0.93857
24.4346	0.827018
24.453	0.736623
24.4713	0.680848
24.4897	0.665461
24.508	0.650075
24.5263	0.626995
24.5447	0.523137
24.563	0.57122
24.5813	0.57122
24.5997	0.569296
24.618	0.640459
24.6363	0.592376
24.6547	0.586606
24.673	0.630842
24.6914	0.692388
24.7097	0.592376
24.728	0.57699
24.7464	0.55391
24.7647	0.523137
24.783	0.573143
24.8014	0.53083
24.8197	0.5366
24.8381	0.534677
24.8564	0.457745
24.8747	0.475055
24.8931	0.413509
24.9114	0.436589
24.9297	0.423126
24.9481	0.409663
24.9664	0.36158
24.9847	0.36735
25.0031	0.365427
25.0214	0.386583
25.0398	0.35581
25.0581	0.323114
25.0764	0.398123
25.0948	0.38466
25.1131	0.36735
25.1314	0.363503
25.1498	0.348117
25.1681	0.38466
25.1865	0.35004
25.2048	0.317344
25.2231	0.317344
25.2415	0.319268
25.2598	0.332731
25.2781	0.294265
25.2965	0.376967
25.3148	0.359657
25.3331	0.286572
25.3515	0.278878
25.3698	0.301958
25.3882	0.35004
25.4065	0.34427
25.4248	0.317344
25.4432	0.36735
25.4615	0.332731
25.4798	0.359657
25.4982	0.348117
25.5165	0.319268
25.5349	0.330807
25.5532	0.317344
25.5715	0.319268
25.5899	0.392353
25.6082	0.36158
25.6265	0.371197
25.6449	0.340424
25.6632	0.37312
25.6815	0.3962
25.6999	0.413509
25.7182	0.428896
25.7366	0.471208
25.7549	0.430819
25.7732	0.475055
25.7916	0.53083
25.8099	0.590453
25.8282	0.492365
25.8466	0.538524
25.8649	0.463515
25.8833	0.450052
25.9016	0.405816
25.9199	0.400046
25.9383	0.37889
25.9566	0.417356
25.9749	0.34427
25.9933	0.328884
26.0116	0.342347
26.0299	0.357734
26.0483	0.338501
26.0666	0.34427
26.085	0.353887
26.1033	0.328884
26.1216	0.301958
26.14	0.288495
26.1583	0.311574
26.1766	0.292341
26.195	0.309651
26.2133	0.35581
26.2317	0.317344
26.25	0.269262
26.2683	0.276955
26.2867	0.313498
26.305	0.313498
26.3233	0.300035
26.3417	0.307728
26.36	0.359657
26.3784	0.326961
26.3967	0.313498
26.415	0.298111
26.4334	0.328884
26.4517	0.326961
26.47	0.325038
26.4884	0.280802
26.5067	0.338501
26.525	0.305805
26.5434	0.348117
26.5617	0.319268
26.5801	0.292341
26.5984	0.300035
26.6167	0.309651
26.6351	0.36158
26.6534	0.317344
26.6717	0.348117
26.6901	0.334654
26.7084	0.413509
26.7268	0.401969
26.7451	0.407739
26.7634	0.442359
26.7818	0.446205
26.8001	0.503904
26.8184	0.503904
26.8368	0.486595
26.8551	0.494288
26.8734	0.590453
26.8918	0.546217
26.9101	0.569296
26.9285	0.540447
26.9468	0.459668
26.9651	0.480825
26.9835	0.451975
27.0018	0.409663
27.0201	0.398123
27.0385	0.413509
27.0568	0.401969
27.0752	0.338501
27.0935	0.351964
27.1118	0.340424
27.1302	0.315421
27.1485	0.325038
27.1668	0.353887
27.1852	0.334654
27.2035	0.392353
27.2218	0.375043
27.2402	0.38466
27.2585	0.407739
27.2769	0.411586
27.2952	0.407739
27.3135	0.438512
27.3319	0.432742
27.3502	0.5366
27.3685	0.523137
27.3869	0.538524
27.4052	0.55391
27.4236	0.607762
27.4419	0.680848
27.4602	0.72893
27.4786	0.802016
27.4969	0.913567
27.5152	0.961649
27.5336	1.05589
27.5519	1.12128
27.5702	1.02896
27.5886	1.07705
27.6069	0.986652
27.6253	0.898181
27.6436	0.967419
27.6619	0.825095
27.6803	0.76355
27.6986	0.671231
27.7169	0.678924
27.7353	0.57122
27.7536	0.513521
27.772	0.601993
27.7903	0.455822
27.8086	0.473132
27.827	0.475055
27.8453	0.417356
27.8636	0.405816
27.882	0.423126
27.9003	0.363503
27.9187	0.417356
27.937	0.388506
27.9553	0.392353
27.9737	0.38466
27.992	0.38466
28.0103	0.346194
28.0287	0.35581
28.047	0.37889
28.0653	0.34427
28.0837	0.338501
28.102	0.340424
28.1204	0.319268
28.1387	0.36735
28.157	0.405816
28.1754	0.37312
28.1937	0.330807
28.212	0.380813
28.2304	0.36158
28.2487	0.357734
28.2671	0.346194
28.2854	0.375043
28.3037	0.426972
28.3221	0.436589
28.3404	0.401969
28.3587	0.417356
28.3771	0.482748
28.3954	0.54237
28.4137	0.563527
28.4321	0.584683
28.4504	0.640459
28.4688	0.777013
28.4871	0.815479
28.5054	0.952033
28.5238	0.971266
28.5421	1.06551
28.5604	1.08282
28.5788	1.12705
28.5971	1.09243
28.6155	1.06935
28.6338	1.01743
28.6521	0.907797
28.6705	0.859715
28.6888	0.765473
28.7071	0.725084
28.7255	0.628919
28.7438	0.567373
28.7621	0.513521
28.7805	0.511597
28.7988	0.417356
28.8172	0.415433
28.8355	0.35004
28.8538	0.37889
28.8722	0.359657
28.8905	0.380813
28.9088	0.340424
28.9272	0.326961
28.9455	0.315421
28.9639	0.332731
28.9822	0.319268
29.0005	0.321191
29.0189	0.292341
29.0372	0.236566
29.0555	0.317344
29.0739	0.265415
29.0922	0.246182
29.1105	0.301958
29.1289	0.284648
29.1472	0.282725
29.1656	0.265415
29.1839	0.275032
29.2022	0.273108
29.2206	0.242336
29.2389	0.280802
29.2572	0.278878
29.2756	0.298111
29.2939	0.263492
29.3123	0.255799
29.3306	0.236566
29.3489	0.286572
29.3673	0.242336
29.3856	0.276955
29.4039	0.246182
29.4223	0.296188
29.4406	0.240412
29.459	0.311574
29.4773	0.240412
29.4956	0.317344
29.514	0.288495
29.5323	0.269262
29.5506	0.311574
29.569	0.251952
29.5873	0.338501
29.6056	0.296188
29.624	0.340424
29.6423	0.290418
29.6607	0.300035
29.679	0.298111
29.6973	0.282725
29.7157	0.276955
29.734	0.305805
29.7523	0.259645
29.7707	0.282725
29.789	0.244259
29.8074	0.280802
29.8257	0.257722
29.844	0.292341
29.8624	0.319268
29.8807	0.298111
29.899	0.300035
29.9174	0.282725
29.9357	0.305805
29.954	0.251952
29.9724	0.242336
29.9907	0.290418
30.0091	0.271185
30.0274	0.269262
30.0457	0.267339
30.0641	0.211563
30.0824	0.225026
30.1007	0.248106
30.1191	0.246182
30.1374	0.226949
30.1558	0.259645
30.1741	0.18656
30.1924	0.221179
30.2108	0.19233
30.2291	0.238489
30.2474	0.242336
30.2658	0.213486
30.2841	0.225026
30.3024	0.211563
30.3208	0.200023
30.3391	0.228873
30.3575	0.205793
30.3758	0.207716
30.3941	0.234642
30.4125	0.196176
30.4308	0.213486
30.4491	0.236566
30.4675	0.223103
30.4858	0.263492
30.5042	0.228873
30.5225	0.251952
30.5408	0.188483
30.5592	0.230796
30.5775	0.251952
30.5958	0.182713
30.6142	0.230796
30.6325	0.20387
30.6508	0.201946
30.6692	0.273108
30.6875	0.190407
30.7059	0.255799
30.7242	0.219256
30.7425	0.238489
30.7609	0.236566
30.7792	0.244259
30.7975	0.242336
30.8159	0.215409
30.8342	0.250029
30.8526	0.259645
30.8709	0.236566
30.8892	0.226949
30.9076	0.273108
30.9259	0.282725
30.9442	0.225026
30.9626	0.248106
30.9809	0.240412
30.9992	0.244259
31.0176	0.261569
31.0359	0.205793
31.0543	0.255799
31.0726	0.286572
31.0909	0.246182
31.1093	0.188483
31.1276	0.248106
31.1459	0.273108
31.1643	0.232719
31.1826	0.234642
31.201	0.278878
31.2193	0.240412
31.2376	0.273108
31.256	0.290418
31.2743	0.275032
31.2926	0.290418
31.311	0.321191
31.3293	0.298111
31.3477	0.336577
31.366	0.35004
31.3843	0.369273
31.4027	0.442359
31.421	0.428896
31.4393	0.425049
31.4577	0.392353
31.476	0.382736
31.4943	0.37889
31.5127	0.394276
31.531	0.332731
31.5494	0.35004
31.5677	0.353887
31.586	0.346194
31.6044	0.342347
31.6227	0.34427
31.641	0.250029
31.6594	0.309651
31.6777	0.332731
31.6961	0.342347
31.7144	0.353887
31.7327	0.307728
31.7511	0.357734
31.7694	0.319268
31.7877	0.276955
31.8061	0.280802
31.8244	0.317344
31.8427	0.278878
31.8611	0.230796
31.8794	0.261569
31.8978	0.269262
31.9161	0.250029
31.9344	0.205793
31.9528	0.228873
31.9711	0.207716
31.9894	0.225026
32.0078	0.238489
32.0261	0.232719
32.0445	0.253875
32.0628	0.223103
32.0811	0.234642
32.0995	0.1981
32.1178	0.200023
32.1361	0.215409
32.1545	0.211563
32.1728	0.188483
32.1911	0.221179
32.2095	0.205793
32.2278	0.221179
32.2462	0.217333
32.2645	0.225026
32.2828	0.259645
32.3012	0.221179
32.3195	0.223103
32.3378	0.194253
32.3562	0.221179
32.3745	0.226949
32.3929	0.246182
32.4112	0.244259
32.4295	0.232719
32.4479	0.244259
32.4662	0.246182
32.4845	0.230796
32.5029	0.269262
32.5212	0.286572
32.5395	0.275032
32.5579	0.271185
32.5762	0.269262
32.5946	0.288495
32.6129	0.244259
32.6312	0.301958
32.6496	0.267339
32.6679	0.290418
32.6862	0.265415
32.7046	0.269262
32.7229	0.273108
32.7413	0.259645
32.7596	0.290418
32.7779	0.263492
32.7963	0.273108
32.8146	0.211563
32.8329	0.273108
32.8513	0.240412
32.8696	0.234642
32.888	0.200023
32.9063	0.230796
32.9246	0.184637
32.943	0.213486
32.9613	0.223103
32.9796	0.238489
32.998	0.190407
33.0163	0.207716
33.0346	0.19233
33.053	0.201946
33.0713	0.184637
33.0897	0.18079
33.108	0.217333
33.1263	0.213486
33.1447	0.225026
33.163	0.221179
33.1813	0.215409
33.1997	0.265415
33.218	0.205793
33.2364	0.1981
33.2547	0.217333
33.273	0.178867
33.2914	0.19233
33.3097	0.240412
33.328	0.17502
33.3464	0.238489
33.3647	0.200023
33.383	0.1981
33.4014	0.236566
33.4197	0.207716
33.4381	0.205793
33.4564	0.184637
33.4747	0.228873
33.4931	0.225026
33.5114	0.228873
33.5297	0.207716
33.5481	0.217333
33.5664	0.194253
33.5848	0.244259
33.6031	0.228873
33.6214	0.225026
33.6398	0.223103
33.6581	0.240412
33.6764	0.263492
33.6948	0.217333
33.7131	0.201946
33.7314	0.226949
33.7498	0.269262
33.7681	0.275032
33.7865	0.261569
33.8048	0.236566
33.8231	0.311574
33.8415	0.251952
33.8598	0.288495
33.8781	0.298111
33.8965	0.35004
33.9148	0.36158
33.9332	0.411586
33.9515	0.421202
33.9698	0.444282
33.9882	0.484671
34.0065	0.56545
34.0248	0.586606
34.0432	0.625072
34.0615	0.690464
34.0798	0.646228
34.0982	0.555833
34.1165	0.546217
34.1349	0.588529
34.1532	0.567373
34.1715	0.480825
34.1899	0.475055
34.2082	0.426972
34.2265	0.380813
34.2449	0.300035
34.2632	0.286572
34.2816	0.282725
34.2999	0.276955
34.3182	0.282725
34.3366	0.255799
34.3549	0.246182
34.3732	0.275032
34.3916	0.273108
34.4099	0.213486
34.4282	0.269262
34.4466	0.228873
34.4649	0.244259
34.4833	0.230796
34.5016	0.211563
34.5199	0.225026
34.5383	0.232719
34.5566	0.20387
34.5749	0.190407
34.5933	0.215409
34.6116	0.178867
34.63	0.238489
34.6483	0.248106
34.6666	0.215409
34.685	0.211563
34.7033	0.171174
34.7216	0.16348
34.74	0.19233
34.7583	0.213486
34.7767	0.217333
34.795	0.217333
34.8133	0.173097
34.8317	0.205793
34.85	0.178867
34.8683	0.200023
34.8867	0.173097
34.905	0.159634
34.9233	0.225026
34.9417	0.19233
34.96	0.200023
34.9784	0.188483
34.9967	0.200023
35.015	0.194253
35.0334	0.18656
35.0517	0.217333
35.07	0.236566
35.0884	0.1981
35.1067	0.205793
35.1251	0.217333
35.1434	0.194253
35.1617	0.19233
35.1801	0.211563
35.1984	0.167327
35.2167	0.221179
35.2351	0.226949
35.2534	0.190407
35.2717	0.190407
35.2901	0.194253
35.3084	0.20387
35.3268	0.219256
35.3451	0.244259
35.3634	0.259645
35.3818	0.221179
35.4001	0.217333
35.4184	0.225026
35.4368	0.230796
35.4551	0.278878
35.4735	0.226949
35.4918	0.259645
35.5101	0.261569
35.5285	0.267339
35.5468	0.315421
35.5651	0.271185
35.5835	0.250029
35.6018	0.313498
35.6201	0.346194
35.6385	0.336577
35.6568	0.426972
35.6752	0.392353
35.6935	0.446205
35.7118	0.432742
35.7302	0.436589
35.7485	0.430819
35.7668	0.428896
35.7852	0.440435
35.8035	0.39043
35.8219	0.348117
35.8402	0.35581
35.8585	0.309651
35.8769	0.382736
35.8952	0.303881
35.9135	0.309651
35.9319	0.282725
35.9502	0.340424
35.9685	0.300035
35.9869	0.236566
36.0052	0.280802
36.0236	0.217333
36.0419	0.238489
36.0602	0.217333
36.0786	0.267339
36.0969	0.225026
36.1152	0.276955
36.1336	0.228873
36.1519	0.205793
36.1703	0.215409
36.1886	0.223103
36.2069	0.217333
36.2253	0.211563
36.2436	0.213486
36.2619	0.217333
36.2803	0.188483
36.2986	0.221179
36.317	0.17502
36.3353	0.17502
36.3536	0.226949
36.372	0.200023
36.3903	0.184637
36.4086	0.190407
36.427	0.151941
36.4453	0.188483
36.4636	0.182713
36.482	0.194253
36.5003	0.1981
36.5187	0.217333
36.537	0.165404
36.5553	0.167327
36.5737	0.184637
36.592	0.173097
36.6103	0.200023
36.6287	0.207716
36.647	0.176943
36.6654	0.228873
36.6837	0.219256
36.702	0.221179
36.7204	0.242336
36.7387	0.215409
36.757	0.223103
36.7754	0.232719
36.7937	0.240412
36.812	0.215409
36.8304	0.207716
36.8487	0.225026
36.8671	0.223103
36.8854	0.1981
36.9037	0.217333
36.9221	0.223103
36.9404	0.215409
36.9587	0.201946
36.9771	0.228873
36.9954	0.16348
37.0138	0.201946
37.0321	0.207716
37.0504	0.20964
37.0688	0.194253
37.0871	0.207716
37.1054	0.18656
37.1238	0.188483
37.1421	0.182713
37.1604	0.190407
37.1788	0.173097
37.1971	0.184637
37.2155	0.219256
37.2338	0.196176
37.2521	0.221179
37.2705	0.194253
37.2888	0.161557
37.3071	0.1981
37.3255	0.18079
37.3438	0.221179
37.3622	0.176943
37.3805	0.16348
37.3988	0.20387
37.4172	0.167327
37.4355	0.188483
37.4538	0.18656
37.4722	0.1981
37.4905	0.20387
37.5088	0.207716
37.5272	0.219256
37.5455	0.194253
37.5639	0.19233
37.5822	0.200023
37.6005	0.20387
37.6189	0.18656
37.6372	0.157711
37.6555	0.18656
37.6739	0.18079
37.6922	0.194253
37.7106	0.201946
37.7289	0.205793
37.7472	0.173097
37.7656	0.223103
37.7839	0.165404
37.8022	0.176943
37.8206	0.18079
37.8389	0.20387
37.8573	0.205793
37.8756	0.148094
37.8939	0.173097
37.9123	0.200023
37.9306	0.155787
37.9489	0.217333
37.9673	0.184637
37.9856	0.176943
38.0039	0.188483
38.0223	0.178867
38.0406	0.167327
38.059	0.165404
38.0773	0.153864
38.0956	0.178867
38.114	0.200023
38.1323	0.18079
38.1506	0.20387
38.169	0.173097
38.1873	0.144247
38.2057	0.173097
38.224	0.159634
38.2423	0.182713
38.2607	0.211563
38.279	0.16925
38.2973	0.18656
38.3157	0.18079
38.334	0.190407
38.3523	0.230796
38.3707	0.167327
38.389	0.184637
38.4074	0.18079
38.4257	0.213486
38.444	0.159634
38.4624	0.188483
38.4807	0.213486
38.499	0.182713
38.5174	0.217333
38.5357	0.167327
38.5541	0.157711
38.5724	0.18079
38.5907	0.171174
38.6091	0.20964
38.6274	0.17502
38.6457	0.211563
38.6641	0.217333
38.6824	0.205793
38.7007	0.205793
38.7191	0.182713
38.7374	0.207716
38.7558	0.205793
38.7741	0.18656
38.7924	0.196176
38.8108	0.228873
38.8291	0.207716
38.8474	0.201946
38.8658	0.20387
38.8841	0.213486
38.9025	0.155787
38.9208	0.194253
38.9391	0.221179
38.9575	0.205793
38.9758	0.234642
38.9941	0.238489
39.0125	0.230796
39.0308	0.251952
39.0491	0.221179
39.0675	0.215409
39.0858	0.261569
39.1042	0.221179
39.1225	0.292341
39.1408	0.303881
39.1592	0.246182
39.1775	0.265415
39.1958	0.257722
39.2142	0.20387
39.2325	0.226949
39.2509	0.253875
39.2692	0.238489
39.2875	0.196176
39.3059	0.18656
39.3242	0.219256
39.3425	0.225026
39.3609	0.238489
39.3792	0.244259
39.3975	0.200023
39.4159	0.18079
39.4342	0.20964
39.4526	0.211563
39.4709	0.20964
39.4892	0.221179
39.5076	0.18656
39.5259	0.196176
39.5442	0.20387
39.5626	0.217333
39.5809	0.196176
39.5993	0.213486
39.6176	0.200023
39.6359	0.207716
39.6543	0.244259
39.6726	0.217333
39.6909	0.201946
39.7093	0.280802
39.7276	0.276955
39.746	0.248106
39.7643	0.275032
39.7826	0.251952
39.801	0.282725
39.8193	0.346194
39.8376	0.338501
39.856	0.334654
39.8743	0.321191
39.8926	0.325038
39.911	0.309651
39.9293	0.348117
39.9477	0.294265
39.966	0.307728
39.9843	0.267339
40.0027	0.278878
40.021	0.251952
40.0393	0.251952
40.0577	0.1981
40.076	0.223103
40.0944	0.223103
40.1127	0.20387
40.131	0.178867
40.1494	0.232719
40.1677	0.217333
40.186	0.228873
40.2044	0.20387
40.2227	0.238489
40.241	0.20387
40.2594	0.196176
40.2777	0.215409
40.2961	0.228873
40.3144	0.250029
40.3327	0.253875
40.3511	0.267339
40.3694	0.250029
40.3877	0.228873
40.4061	0.20964
40.4244	0.251952
40.4428	0.234642
40.4611	0.244259
40.4794	0.246182
40.4978	0.205793
40.5161	0.246182
40.5344	0.238489
[truncated: 1,056 more rows]

## Sheet: Heating 105 °C
2theta	Intensity
3.89731	1.40208
3.91565	1.41555
3.93399	1.38862
3.95232	1.35593
3.97066	1.42709
3.989	1.43863
4.00733	1.50787
4.02567	1.4694
4.04401	1.38862
4.06234	1.40978
4.08068	1.4694
4.09902	1.30977
4.11735	1.31938
4.13569	1.38478
4.15403	1.41362
4.17237	1.44632
4.1907	1.34823
4.20904	1.4444
4.22738	1.33285
4.24571	1.39055
4.26405	1.29053
4.28239	1.32323
4.30072	1.40401
4.31906	1.29053
4.3374	1.38285
4.35573	1.29246
4.37407	1.304
4.39241	1.30784
4.41075	1.33092
4.42908	1.27899
4.44742	1.27707
4.46576	1.33092
4.48409	1.37131
4.50243	1.24822
4.52077	1.27322
4.5391	1.33477
4.55744	1.32131
4.57578	1.18475
4.59411	1.25784
4.61245	1.24245
4.63079	1.27707
4.64913	1.28669
4.66746	1.28861
4.6858	1.22322
4.70414	1.27899
4.72247	1.26361
4.74081	1.17129
4.75915	1.25784
4.77748	1.33285
4.79582	1.23091
4.81416	1.15975
4.83249	1.15206
4.85083	1.20591
4.86917	1.23283
4.8875	1.14052
4.90584	1.06166
4.92418	1.22322
4.94252	1.21552
4.96085	1.18283
4.97919	1.16552
4.99753	1.17129
5.01586	1.14436
5.0342	1.15206
5.05254	1.08859
5.07087	1.17514
5.08921	1.19822
5.10755	1.18475
5.12588	1.14629
5.14422	1.12128
5.16256	1.20206
5.1809	1.15398
5.19923	1.16744
5.21757	1.08666
5.23591	1.12513
5.25424	1.16744
5.27258	1.09436
5.29092	1.0982
5.30925	1.1559
5.32759	1.07128
5.34593	1.1636
5.36426	1.20014
5.3826	1.08474
5.40094	1.06358
5.41927	1.09051
5.43761	1.03666
5.45595	1.06166
5.47429	1.13282
5.49262	1.15398
5.51096	1.08666
5.5293	1.13475
5.54763	1.10782
5.56597	1.05589
5.58431	1.11551
5.60264	1.1886
5.62098	1.10205
5.63932	1.12898
5.65765	1.08859
5.67599	1.13667
5.69433	1.09628
5.71267	1.08474
5.731	1.06743
5.74934	1.10397
5.76768	1.10205
5.78601	1.08282
5.80435	1.14629
5.82269	1.15013
5.84102	1.11936
5.85936	1.09051
5.8777	1.09628
5.89603	1.17514
5.91437	1.20014
5.93271	1.19822
5.95104	1.2136
5.96938	1.15398
5.98772	1.11936
6.00606	1.25014
6.02439	1.329
6.04273	1.27322
6.06107	1.35593
6.0794	1.26553
6.09774	1.25976
6.11608	1.32708
6.13441	1.42324
6.15275	1.41747
6.17109	1.39055
6.18942	1.44055
6.20776	1.48671
6.2261	1.52133
6.24444	1.60018
6.26277	1.66173
6.28111	1.62711
6.29945	1.76751
6.31778	1.80598
6.33612	1.7829
6.35446	1.95599
6.37279	1.8406
6.39113	2.01946
6.40947	2.09255
6.4278	2.20025
6.44614	2.20602
6.46448	2.31758
6.48282	2.53491
6.50115	2.64838
6.51949	2.67146
6.53783	2.77532
6.55616	2.93495
6.5745	3.05805
6.59284	3.34077
6.61117	3.4504
6.62951	3.60811
6.64785	3.97354
6.66618	4.33704
6.68452	4.46205
6.70286	4.66977
6.72119	4.95634
6.73953	5.40255
6.75787	5.68527
6.77621	5.98338
6.79454	6.41997
6.81288	6.8931
6.83122	7.35662
6.84955	7.8259
6.86789	8.55099
6.88623	9.42224
6.90456	10.0396
6.9229	10.9436
6.94124	12.0552
6.95957	13.1592
6.97791	14.5324
6.99625	15.7057
7.01459	17.3943
7.03292	19.2984
7.05126	20.6755
7.0696	22.9373
7.08793	25.0087
7.10627	27.3705
7.12461	30.2266
7.14294	33.075
7.16128	36.962
7.17962	40.722
7.19795	45.686
7.21629	51.8521
7.23463	58.9203
7.25296	67.6809
7.2713	78.6033
7.28964	90.472
7.30798	103.797
7.32631	117.917
7.34465	132.996
7.36299	143.618
7.38132	142.774
7.39966	126.868
7.418	103.535
7.43633	79.8342
7.45467	59.4626
7.47301	41.6433
7.49134	29.1668
7.50968	21.7602
7.52802	17.602
7.54636	13.5593
7.56469	10.2069
7.58303	7.4951
7.60137	5.41793
7.6197	4.02931
7.63804	3.26576
7.65638	2.83687
7.67471	2.60992
7.69305	2.38874
7.71139	2.07716
7.72972	2.08293
7.74806	1.80982
7.7664	1.86945
7.78473	1.66558
7.80307	1.57903
7.82141	1.56364
7.83975	1.50017
7.85808	1.4367
7.87642	1.26745
7.89476	1.17321
7.91309	1.30015
7.93143	1.1636
7.94977	1.1636
7.9681	1.16937
7.98644	1.12321
8.00478	1.05589
8.02311	1.00396
8.04145	0.967419
8.05979	0.998192
8.07813	0.905874
8.09646	0.90972
8.1148	0.923183
8.13314	0.925107
8.15147	0.928953
8.16981	0.882794
8.18815	0.853945
8.20648	0.846251
8.22482	0.788553
8.24316	0.882794
8.26149	0.821249
8.27983	0.767396
8.29817	0.765473
8.3165	0.650075
8.33484	0.792399
8.35318	0.74047
8.37152	0.750087
8.38985	0.742393
8.40819	0.750087
8.42653	0.684694
8.44486	0.673155
8.4632	0.771243
8.48154	0.655845
8.49987	0.732777
8.51821	0.703927
8.53655	0.671231
8.55488	0.642382
8.57322	0.665461
8.59156	0.682771
8.6099	0.630842
8.62823	0.653922
8.64657	0.611609
8.66491	0.580836
8.68324	0.596223
8.70158	0.692388
8.71992	0.636612
8.73825	0.615456
8.75659	0.584683
8.77493	0.575066
8.79326	0.586606
8.8116	0.525061
8.82994	0.605839
8.84828	0.603916
8.86661	0.53083
8.88495	0.600069
8.90329	0.598146
8.92162	0.555833
8.93996	0.592376
8.9583	0.623149
8.97663	0.563527
8.99497	0.580836
9.01331	0.630842
9.03164	0.503904
9.04998	0.546217
9.06832	0.526984
9.08665	0.55391
9.10499	0.586606
9.12333	0.550063
9.14167	0.525061
9.16	0.521214
9.17834	0.538524
9.19668	0.486595
9.21501	0.526984
9.23335	0.505828
9.25169	0.505828
9.27002	0.476978
9.28836	0.498134
9.3067	0.450052
9.32503	0.503904
9.34337	0.523137
9.36171	0.54814
9.38005	0.540447
9.39838	0.557757
9.41672	0.54814
9.43506	0.54237
9.45339	0.482748
9.47173	0.534677
9.49007	0.515444
9.5084	0.513521
9.52674	0.509674
9.54508	0.494288
9.56341	0.500058
9.58175	0.534677
9.60009	0.478901
9.61842	0.513521
9.63676	0.490441
9.6551	0.480825
9.67344	0.484671
9.69177	0.507751
9.71011	0.451975
9.72845	0.509674
9.74678	0.473132
9.76512	0.467362
9.78346	0.448129
9.80179	0.503904
9.82013	0.486595
9.83847	0.475055
9.8568	0.501981
9.87514	0.517367
9.89348	0.494288
9.91182	0.478901
9.93015	0.453899
9.94849	0.436589
9.96683	0.490441
9.98516	0.442359
10.0035	0.465438
10.0218	0.453899
10.0402	0.467362
10.0585	0.436589
10.0768	0.482748
10.0952	0.486595
10.1135	0.503904
10.1319	0.476978
10.1502	0.503904
10.1685	0.425049
10.1869	0.417356
10.2052	0.498134
10.2235	0.421202
10.2419	0.403893
10.2602	0.450052
10.2786	0.409663
10.2969	0.465438
10.3152	0.438512
10.3336	0.455822
10.3519	0.471208
10.3702	0.417356
10.3886	0.467362
10.4069	0.426972
10.4252	0.434666
10.4436	0.425049
10.4619	0.440435
10.4803	0.426972
10.4986	0.440435
10.5169	0.465438
10.5353	0.419279
10.5536	0.461592
10.5719	0.436589
10.5903	0.461592
10.6086	0.380813
10.627	0.421202
10.6453	0.430819
10.6636	0.430819
10.682	0.448129
10.7003	0.413509
10.7186	0.434666
10.737	0.411586
10.7553	0.494288
10.7736	0.436589
10.792	0.459668
10.8103	0.442359
10.8287	0.417356
10.847	0.459668
10.8653	0.401969
10.8837	0.388506
10.902	0.413509
10.9203	0.39043
10.9387	0.394276
10.957	0.388506
10.9754	0.417356
10.9937	0.380813
11.012	0.369273
11.0304	0.37312
11.0487	0.369273
11.067	0.419279
11.0854	0.432742
11.1037	0.436589
11.1221	0.413509
11.1404	0.475055
11.1587	0.438512
11.1771	0.403893
11.1954	0.430819
11.2137	0.457745
11.2321	0.457745
11.2504	0.409663
11.2687	0.394276
11.2871	0.442359
11.3054	0.421202
11.3238	0.440435
11.3421	0.353887
11.3604	0.3962
11.3788	0.38466
11.3971	0.398123
11.4154	0.442359
11.4338	0.37889
11.4521	0.380813
11.4705	0.392353
11.4888	0.434666
11.5071	0.409663
11.5255	0.461592
11.5438	0.442359
11.5621	0.419279
11.5805	0.409663
11.5988	0.400046
11.6171	0.39043
11.6355	0.430819
11.6538	0.346194
11.6722	0.392353
11.6905	0.380813
11.7088	0.430819
11.7272	0.413509
11.7455	0.37312
11.7638	0.388506
11.7822	0.400046
11.8005	0.392353
11.8189	0.38466
11.8372	0.394276
11.8555	0.3962
11.8739	0.403893
11.8922	0.430819
11.9105	0.405816
11.9289	0.446205
11.9472	0.38466
11.9655	0.369273
11.9839	0.423126
12.0022	0.419279
12.0206	0.386583
12.0389	0.448129
12.0572	0.446205
12.0756	0.440435
12.0939	0.413509
12.1122	0.423126
12.1306	0.401969
12.1489	0.394276
12.1673	0.400046
12.1856	0.369273
12.2039	0.398123
12.2223	0.428896
12.2406	0.407739
12.2589	0.411586
12.2773	0.425049
12.2956	0.455822
12.3139	0.457745
12.3323	0.459668
12.3506	0.465438
12.369	0.444282
12.3873	0.453899
12.4056	0.515444
12.424	0.467362
12.4423	0.523137
12.4606	0.53083
12.479	0.575066
12.4973	0.648152
12.5157	0.626995
12.534	0.617379
12.5523	0.688541
12.5707	0.72893
12.589	0.794322
12.6073	0.877024
12.6257	1.06551
12.644	1.0155
12.6624	1.26938
12.6807	1.38285
12.699	1.56941
12.7174	1.84829
12.7357	2.05601
12.754	2.35027
12.7724	2.55799
12.7907	2.51952
12.809	2.28103
12.8274	1.98677
12.8457	1.59634
12.8641	1.14052
12.8824	0.878948
12.9007	0.72316
12.9191	0.644305
12.9374	0.567373
12.9557	0.519291
12.9741	0.463515
12.9924	0.415433
13.0108	0.455822
13.0291	0.405816
13.0474	0.428896
13.0658	0.38466
13.0841	0.457745
13.1024	0.453899
13.1208	0.351964
13.1391	0.400046
13.1574	0.409663
13.1758	0.375043
13.1941	0.35581
13.2125	0.409663
13.2308	0.382736
13.2491	0.351964
13.2675	0.398123
13.2858	0.36158
13.3041	0.3962
13.3225	0.357734
13.3408	0.346194
13.3592	0.369273
13.3775	0.386583
13.3958	0.317344
13.4142	0.382736
13.4325	0.357734
13.4508	0.351964
13.4692	0.38466
13.4875	0.321191
13.5058	0.332731
13.5242	0.359657
13.5425	0.36158
13.5609	0.307728
13.5792	0.398123
13.5975	0.35581
13.6159	0.286572
13.6342	0.334654
13.6525	0.332731
13.6709	0.321191
13.6892	0.334654
13.7076	0.426972
13.7259	0.338501
13.7442	0.326961
13.7626	0.313498
13.7809	0.37889
13.7992	0.328884
13.8176	0.363503
13.8359	0.371197
13.8542	0.346194
13.8726	0.332731
13.8909	0.407739
13.9093	0.415433
13.9276	0.353887
13.9459	0.35004
13.9643	0.340424
13.9826	0.36158
14.0009	0.296188
14.0193	0.392353
14.0376	0.398123
14.056	0.326961
14.0743	0.321191
14.0926	0.323114
14.111	0.353887
14.1293	0.37889
14.1476	0.328884
14.166	0.334654
14.1843	0.363503
14.2026	0.359657
14.221	0.419279
14.2393	0.407739
14.2577	0.36158
14.276	0.334654
14.2943	0.313498
14.3127	0.37312
14.331	0.35004
14.3493	0.365427
14.3677	0.357734
14.386	0.359657
14.4044	0.365427
14.4227	0.338501
14.441	0.401969
14.4594	0.39043
14.4777	0.375043
14.496	0.37889
14.5144	0.37312
14.5327	0.448129
14.5511	0.421202
14.5694	0.459668
14.5877	0.413509
14.6061	0.430819
14.6244	0.407739
14.6427	0.442359
14.6611	0.409663
14.6794	0.453899
14.6977	0.3962
14.7161	0.444282
14.7344	0.442359
14.7528	0.467362
14.7711	0.398123
14.7894	0.3962
14.8078	0.467362
14.8261	0.430819
14.8444	0.38466
14.8628	0.363503
14.8811	0.405816
14.8995	0.353887
14.9178	0.365427
14.9361	0.348117
14.9545	0.359657
14.9728	0.34427
14.9911	0.35581
15.0095	0.353887
15.0278	0.36735
15.0461	0.334654
15.0645	0.35004
15.0828	0.338501
15.1012	0.357734
15.1195	0.303881
15.1378	0.309651
15.1562	0.315421
15.1745	0.315421
15.1928	0.357734
15.2112	0.311574
15.2295	0.392353
15.2479	0.315421
15.2662	0.346194
15.2845	0.357734
15.3029	0.332731
15.3212	0.309651
15.3395	0.315421
15.3579	0.317344
15.3762	0.34427
15.3945	0.298111
15.4129	0.35581
15.4312	0.353887
15.4496	0.346194
15.4679	0.371197
15.4862	0.336577
15.5046	0.307728
15.5229	0.38466
15.5412	0.36158
15.5596	0.353887
15.5779	0.359657
15.5963	0.359657
15.6146	0.34427
15.6329	0.326961
15.6513	0.375043
15.6696	0.407739
15.6879	0.39043
15.7063	0.386583
15.7246	0.369273
15.7429	0.405816
15.7613	0.428896
15.7796	0.455822
15.798	0.436589
15.8163	0.513521
15.8346	0.465438
15.853	0.482748
15.8713	0.528907
15.8896	0.575066
15.908	0.563527
15.9263	0.540447
15.9447	0.736623
15.963	0.653922
15.9813	0.736623
15.9997	0.665461
16.018	0.753933
16.0363	0.682771
16.0547	0.642382
16.073	0.638535
16.0914	0.546217
16.1097	0.615456
16.128	0.507751
16.1464	0.482748
16.1647	0.446205
16.183	0.451975
16.2014	0.411586
16.2197	0.469285
16.238	0.365427
16.2564	0.336577
16.2747	0.405816
16.2931	0.382736
16.3114	0.363503
16.3297	0.38466
16.3481	0.328884
16.3664	0.365427
16.3847	0.336577
16.4031	0.386583
16.4214	0.342347
16.4398	0.369273
16.4581	0.382736
16.4764	0.426972
16.4948	0.36158
16.5131	0.311574
16.5314	0.36735
16.5498	0.394276
16.5681	0.369273
16.5864	0.351964
16.6048	0.330807
16.6231	0.315421
16.6415	0.35004
16.6598	0.340424
16.6781	0.38466
16.6965	0.340424
16.7148	0.353887
16.7331	0.340424
16.7515	0.332731
16.7698	0.413509
16.7882	0.313498
16.8065	0.342347
16.8248	0.311574
16.8432	0.36735
16.8615	0.342347
16.8798	0.328884
16.8982	0.348117
16.9165	0.394276
16.9348	0.346194
16.9532	0.300035
16.9715	0.359657
16.9899	0.342347
17.0082	0.35581
17.0265	0.36158
17.0449	0.37312
17.0632	0.359657
17.0815	0.363503
17.0999	0.36158
17.1182	0.307728
17.1366	0.392353
17.1549	0.371197
17.1732	0.380813
17.1916	0.375043
17.2099	0.388506
17.2282	0.37889
17.2466	0.338501
17.2649	0.351964
17.2832	0.365427
17.3016	0.409663
17.3199	0.432742
17.3383	0.425049
17.3566	0.438512
17.3749	0.401969
17.3933	0.461592
17.4116	0.398123
17.4299	0.463515
17.4483	0.446205
17.4666	0.513521
17.485	0.498134
17.5033	0.5366
17.5216	0.575066
17.54	0.623149
17.5583	0.682771
17.5766	0.659691
17.595	0.711621
17.6133	0.71739
17.6316	0.713544
17.65	0.703927
17.6683	0.755856
17.6867	0.71739
17.705	0.603916
17.7233	0.636612
17.7417	0.607762
17.76	0.532754
17.7783	0.58276
17.7967	0.513521
17.815	0.519291
17.8334	0.438512
17.8517	0.482748
17.87	0.463515
17.8884	0.417356
17.9067	0.448129
17.925	0.407739
17.9434	0.409663
17.9617	0.492365
17.9801	0.376967
17.9984	0.461592
18.0167	0.459668
18.0351	0.407739
18.0534	0.461592
18.0717	0.417356
18.0901	0.417356
18.1084	0.417356
18.1267	0.457745
18.1451	0.503904
18.1634	0.471208
18.1818	0.469285
18.2001	0.438512
18.2184	0.400046
18.2368	0.461592
18.2551	0.421202
18.2734	0.432742
18.2918	0.471208
18.3101	0.417356
18.3285	0.417356
18.3468	0.409663
18.3651	0.394276
18.3835	0.419279
18.4018	0.380813
18.4201	0.386583
18.4385	0.450052
18.4568	0.451975
18.4751	0.434666
18.4935	0.457745
18.5118	0.330807
18.5302	0.421202
18.5485	0.415433
18.5668	0.401969
18.5852	0.425049
18.6035	0.401969
18.6218	0.413509
18.6402	0.407739
18.6585	0.419279
18.6769	0.459668
18.6952	0.438512
18.7135	0.463515
18.7319	0.457745
18.7502	0.442359
18.7685	0.475055
18.7869	0.419279
18.8052	0.534677
18.8235	0.407739
18.8419	0.500058
18.8602	0.440435
18.8786	0.465438
18.8969	0.448129
18.9152	0.467362
18.9336	0.480825
18.9519	0.507751
18.9702	0.432742
18.9886	0.469285
19.0069	0.505828
19.0253	0.507751
19.0436	0.494288
19.0619	0.494288
19.0803	0.561603
19.0986	0.526984
19.1169	0.575066
19.1353	0.623149
19.1536	0.682771
19.1719	0.675078
19.1903	0.667385
19.2086	0.692388
19.227	0.742393
19.2453	0.748163
19.2636	0.825095
19.282	0.840482
19.3003	0.882794
19.3186	1.06551
19.337	1.02704
19.3553	1.22322
19.3737	1.4944
19.392	1.57903
19.4103	1.7752
19.4287	2.1791
19.447	2.57337
19.4653	3.02535
19.4837	3.80429
19.502	4.44282
19.5204	5.64296
19.5387	6.50844
19.557	7.46048
19.5754	8.17979
19.5937	8.43751
19.612	8.31634
19.6304	7.30277
19.6487	6.18341
19.667	4.98134
19.6854	3.85429
19.7037	2.94265
19.7221	2.40797
19.7404	1.89253
19.7587	1.48863
19.7771	1.2463
19.7954	1.1309
19.8137	0.961649
19.8321	0.848175
19.8504	0.803939
19.8688	0.759703
19.8871	0.680848
19.9054	0.732777
19.9238	0.646228
19.9421	0.653922
19.9604	0.623149
19.9788	0.596223
19.9971	0.550063
20.0154	0.540447
20.0338	0.521214
20.0521	0.53083
20.0705	0.509674
20.0888	0.528907
20.1071	0.478901
20.1255	0.465438
20.1438	0.480825
20.1621	0.55391
20.1805	0.480825
20.1988	0.517367
20.2172	0.465438
20.2355	0.471208
20.2538	0.496211
20.2722	0.503904
20.2905	0.469285
20.3088	0.467362
20.3272	0.467362
20.3455	0.494288
20.3638	0.438512
20.3822	0.490441
20.4005	0.444282
20.4189	0.490441
20.4372	0.517367
20.4555	0.473132
20.4739	0.480825
20.4922	0.471208
20.5105	0.463515
20.5289	0.500058
20.5472	0.498134
20.5656	0.53083
20.5839	0.438512
20.6022	0.511597
20.6206	0.498134
20.6389	0.540447
20.6572	0.486595
20.6756	0.498134
20.6939	0.523137
20.7122	0.519291
20.7306	0.511597
20.7489	0.492365
20.7673	0.540447
20.7856	0.505828
20.8039	0.532754
20.8223	0.473132
20.8406	0.56545
20.8589	0.557757
20.8773	0.590453
20.8956	0.56545
20.914	0.575066
20.9323	0.601993
20.9506	0.57699
20.969	0.594299
20.9873	0.596223
21.0056	0.638535
21.024	0.642382
21.0423	0.57122
21.0607	0.619302
21.079	0.509674
21.0973	0.546217
21.1157	0.511597
21.134	0.534677
21.1523	0.526984
21.1707	0.490441
21.189	0.446205
21.2073	0.567373
21.2257	0.55391
21.244	0.521214
21.2624	0.503904
21.2807	0.584683
21.299	0.521214
21.3174	0.55968
21.3357	0.519291
21.354	0.57699
21.3724	0.590453
21.3907	0.523137
21.4091	0.609686
21.4274	0.498134
21.4457	0.594299
21.4641	0.648152
21.4824	0.702004
21.5007	0.732777
21.5191	0.703927
21.5374	0.74047
21.5557	0.848175
21.5741	0.884717
21.5924	0.882794
21.6108	1.04435
21.6291	1.02512
21.6474	1.20783
21.6658	1.38478
21.6841	1.43478
21.7024	1.52325
21.7208	1.70789
21.7391	2.04254
21.7575	2.25411
21.7758	2.58684
21.7941	2.83879
21.8125	2.92726
21.8308	3.27922
21.8491	3.17152
21.8675	3.1042
21.8858	2.89264
21.9041	2.77532
21.9225	2.60607
21.9408	2.20795
21.9592	2.006
21.9775	1.75982
21.9958	1.5848
22.0142	1.47517
22.0325	1.44632
22.0508	1.19052
22.0692	1.08859
22.0875	1.0482
22.1059	1.10782
22.1242	1.13859
22.1425	1.07705
22.1609	1.20399
22.1792	1.21745
22.1975	1.45017
22.2159	1.47517
22.2342	1.58864
22.2525	1.56941
22.2709	1.68481
22.2892	1.53864
22.3076	1.30592
22.3259	1.30207
22.3442	1.21745
22.3626	1.00781
22.3809	0.953956
22.3992	0.840482
22.4176	0.786629
22.4359	0.782783
22.4543	0.72316
22.4726	0.642382
22.4909	0.653922
22.5093	0.578913
22.5276	0.528907
22.5459	0.538524
22.5643	0.590453
22.5826	0.575066
22.6009	0.5366
22.6193	0.500058
22.6376	0.490441
22.656	0.482748
22.6743	0.523137
22.6926	0.461592
22.711	0.438512
22.7293	0.425049
22.7476	0.453899
22.766	0.494288
22.7843	0.492365
22.8027	0.438512
22.821	0.450052
22.8393	0.438512
22.8577	0.415433
22.876	0.467362
22.8943	0.400046
22.9127	0.411586
22.931	0.419279
22.9494	0.411586
22.9677	0.436589
22.986	0.430819
23.0044	0.36158
23.0227	0.467362
23.041	0.425049
23.0594	0.436589
23.0777	0.392353
23.096	0.434666
23.1144	0.398123
23.1327	0.415433
23.1511	0.436589
23.1694	0.436589
23.1877	0.425049
23.2061	0.448129
23.2244	0.376967
23.2427	0.428896
23.2611	0.523137
23.2794	0.401969
23.2978	0.469285
23.3161	0.471208
23.3344	0.417356
23.3528	0.407739
23.3711	0.436589
23.3894	0.421202
23.4078	0.438512
23.4261	0.476978
23.4444	0.532754
23.4628	0.467362
23.4811	0.438512
23.4995	0.480825
23.5178	0.473132
23.5361	0.453899
23.5545	0.455822
23.5728	0.476978
23.5911	0.496211
23.6095	0.421202
23.6278	0.440435
23.6462	0.409663
23.6645	0.453899
23.6828	0.463515
23.7012	0.446205
23.7195	0.426972
23.7378	0.386583
23.7562	0.432742
23.7745	0.423126
23.7928	0.421202
23.8112	0.450052
23.8295	0.401969
23.8479	0.451975
23.8662	0.467362
23.8845	0.513521
23.9029	0.421202
23.9212	0.409663
23.9395	0.398123
23.9579	0.451975
23.9762	0.490441
23.9946	0.515444
24.0129	0.505828
24.0312	0.557757
24.0496	0.540447
24.0679	0.625072
24.0862	0.686618
24.1046	0.621226
24.1229	0.700081
24.1412	0.884717
24.1596	0.869331
24.1779	0.892411
24.1963	1.04627
24.2146	1.15975
24.2329	1.17129
24.2513	1.25784
24.2696	1.35785
24.2879	1.23668
24.3063	1.24437
24.3246	1.0982
24.343	1.14052
24.3613	0.959726
24.3796	0.959726
24.398	0.855868
24.4163	0.7347
24.4346	0.75778
24.453	0.688541
24.4713	0.619302
24.4897	0.590453
24.508	0.613532
24.5263	0.648152
24.5447	0.600069
24.563	0.551987
24.5813	0.496211
24.5997	0.605839
24.618	0.567373
24.6363	0.58276
24.6547	0.632765
24.673	0.58276
24.6914	0.650075
24.7097	0.56545
24.728	0.586606
24.7464	0.540447
24.7647	0.57699
24.783	0.519291
24.8014	0.488518
24.8197	0.546217
24.8381	0.446205
24.8564	0.438512
24.8747	0.448129
24.8931	0.407739
24.9114	0.421202
24.9297	0.405816
24.9481	0.419279
24.9664	0.386583
24.9847	0.34427
25.0031	0.37312
25.0214	0.38466
25.0398	0.334654
25.0581	0.334654
25.0764	0.298111
25.0948	0.380813
25.1131	0.315421
25.1314	0.334654
25.1498	0.376967
25.1681	0.400046
25.1865	0.353887
25.2048	0.35004
25.2231	0.325038
25.2415	0.328884
25.2598	0.319268
25.2781	0.313498
25.2965	0.307728
25.3148	0.334654
25.3331	0.300035
25.3515	0.35004
25.3698	0.342347
25.3882	0.319268
25.4065	0.346194
25.4248	0.351964
25.4432	0.407739
25.4615	0.325038
25.4798	0.357734
25.4982	0.323114
25.5165	0.300035
25.5349	0.336577
25.5532	0.359657
25.5715	0.36735
25.5899	0.328884
25.6082	0.34427
25.6265	0.401969
25.6449	0.334654
25.6632	0.434666
25.6815	0.451975
25.6999	0.446205
25.7182	0.473132
25.7366	0.475055
25.7549	0.440435
25.7732	0.509674
25.7916	0.507751
25.8099	0.482748
25.8282	0.494288
25.8466	0.471208
25.8649	0.434666
25.8833	0.463515
25.9016	0.411586
25.9199	0.359657
25.9383	0.380813
25.9566	0.353887
25.9749	0.326961
25.9933	0.336577
26.0116	0.353887
26.0299	0.35581
26.0483	0.359657
26.0666	0.282725
26.085	0.369273
26.1033	0.323114
26.1216	0.328884
26.14	0.334654
26.1583	0.288495
26.1766	0.36158
26.195	0.338501
26.2133	0.321191
26.2317	0.265415
26.25	0.323114
26.2683	0.36735
26.2867	0.317344
26.305	0.35581
26.3233	0.275032
26.3417	0.321191
26.36	0.251952
26.3784	0.338501
26.3967	0.336577
26.415	0.336577
26.4334	0.309651
26.4517	0.332731
26.47	0.323114
26.4884	0.328884
26.5067	0.353887
26.525	0.325038
26.5434	0.300035
26.5617	0.321191
26.5801	0.321191
26.5984	0.315421
26.6167	0.348117
26.6351	0.353887
26.6534	0.348117
26.6717	0.401969
26.6901	0.450052
26.7084	0.407739
26.7268	0.442359
26.7451	0.463515
26.7634	0.486595
26.7818	0.567373
26.8001	0.525061
26.8184	0.501981
26.8368	0.56545
26.8551	0.573143
26.8734	0.546217
26.8918	0.500058
26.9101	0.509674
26.9285	0.426972
26.9468	0.436589
26.9651	0.434666
26.9835	0.423126
27.0018	0.409663
27.0201	0.401969
27.0385	0.394276
27.0568	0.346194
27.0752	0.353887
27.0935	0.39043
27.1118	0.340424
27.1302	0.371197
27.1485	0.363503
27.1668	0.365427
27.1852	0.413509
27.2035	0.380813
27.2218	0.405816
27.2402	0.438512
27.2585	0.39043
27.2769	0.37889
27.2952	0.421202
27.3135	0.463515
27.3319	0.526984
27.3502	0.55391
27.3685	0.578913
27.3869	0.659691
27.4052	0.653922
27.4236	0.748163
27.4419	0.825095
27.4602	0.863561
27.4786	0.913567
27.4969	1.00396
27.5152	1.06743
27.5336	1.0482
27.5519	1.00012
27.5702	1.04435
27.5886	1.0155
27.6069	0.888564
27.6253	0.844328
27.6436	0.738547
27.6619	0.713544
27.6803	0.588529
27.6986	0.603916
27.7169	0.596223
27.7353	0.534677
27.7536	0.482748
27.772	0.469285
27.7903	0.471208
27.8086	0.440435
27.827	0.480825
27.8453	0.453899
27.8636	0.403893
27.882	0.369273
27.9003	0.407739
27.9187	0.411586
27.937	0.34427
27.9553	0.369273
27.9737	0.375043
27.992	0.376967
28.0103	0.346194
28.0287	0.369273
28.047	0.34427
28.0653	0.359657
28.0837	0.363503
28.102	0.37312
28.1204	0.351964
28.1387	0.369273
28.157	0.371197
28.1754	0.403893
28.1937	0.37889
28.212	0.357734
28.2304	0.340424
28.2487	0.371197
28.2671	0.438512
28.2854	0.392353
28.3037	0.436589
28.3221	0.482748
28.3404	0.488518
28.3587	0.513521
28.3771	0.58276
28.3954	0.613532
28.4137	0.640459
28.4321	0.784706
28.4504	0.805862
28.4688	0.952033
28.4871	1.00012
28.5054	1.0155
28.5238	1.09628
28.5421	1.17321
28.5604	1.05012
28.5788	1.01743
28.5971	1.04627
28.6155	0.886641
28.6338	0.75201
28.6521	0.767396
28.6705	0.671231
28.6888	0.630842
28.7071	0.511597
28.7255	0.515444
28.7438	0.569296
28.7621	0.465438
28.7805	0.455822
28.7988	0.401969
28.8172	0.428896
28.8355	0.388506
28.8538	0.38466
28.8722	0.392353
28.8905	0.296188
28.9088	0.319268
28.9272	0.338501
28.9455	0.307728
28.9639	0.35004
28.9822	0.278878
29.0005	0.35004
29.0189	0.351964
29.0372	0.284648
29.0555	0.250029
29.0739	0.292341
29.0922	0.257722
29.1105	0.242336
29.1289	0.315421
29.1472	0.251952
29.1656	0.267339
29.1839	0.259645
29.2022	0.301958
29.2206	0.265415
29.2389	0.257722
29.2572	0.267339
29.2756	0.213486
29.2939	0.294265
29.3123	0.234642
29.3306	0.296188
29.3489	0.278878
29.3673	0.301958
29.3856	0.248106
29.4039	0.282725
29.4223	0.284648
29.4406	0.282725
29.459	0.248106
29.4773	0.309651
29.4956	0.307728
29.514	0.292341
29.5323	0.307728
29.5506	0.328884
29.569	0.319268
29.5873	0.242336
29.6056	0.280802
29.624	0.323114
29.6423	0.290418
29.6607	0.330807
29.679	0.276955
29.6973	0.267339
29.7157	0.278878
29.734	0.325038
29.7523	0.290418
29.7707	0.292341
29.789	0.290418
29.8074	0.282725
29.8257	0.280802
29.844	0.265415
29.8624	0.303881
29.8807	0.282725
29.899	0.275032
29.9174	0.286572
29.9357	0.275032
29.954	0.230796
29.9724	0.280802
29.9907	0.271185
30.0091	0.276955
30.0274	0.275032
30.0457	0.278878
30.0641	0.236566
30.0824	0.230796
30.1007	0.253875
30.1191	0.246182
30.1374	0.20964
30.1558	0.213486
30.1741	0.219256
30.1924	0.207716
30.2108	0.230796
30.2291	0.217333
30.2474	0.232719
30.2658	0.219256
30.2841	0.240412
30.3024	0.226949
30.3208	0.211563
30.3391	0.228873
30.3575	0.201946
30.3758	0.213486
30.3941	0.215409
30.4125	0.225026
30.4308	0.257722
30.4491	0.228873
30.4675	0.20964
30.4858	0.217333
30.5042	0.219256
30.5225	0.228873
30.5408	0.200023
30.5592	0.219256
30.5775	0.219256
30.5958	0.19233
30.6142	0.242336
30.6325	0.251952
30.6508	0.215409
30.6692	0.1981
30.6875	0.240412
30.7059	0.250029
30.7242	0.271185
30.7425	0.271185
30.7609	0.246182
30.7792	0.248106
30.7975	0.267339
30.8159	0.267339
30.8342	0.253875
30.8526	0.257722
30.8709	0.248106
30.8892	0.259645
30.9076	0.238489
30.9259	0.232719
30.9442	0.244259
30.9626	0.217333
30.9809	0.282725
30.9992	0.226949
31.0176	0.221179
31.0359	0.257722
31.0543	0.244259
31.0726	0.255799
31.0909	0.213486
31.1093	0.284648
31.1276	0.253875
31.1459	0.271185
31.1643	0.255799
31.1826	0.278878
31.201	0.284648
31.2193	0.269262
31.2376	0.286572
31.256	0.269262
31.2743	0.286572
31.2926	0.330807
31.311	0.330807
31.3293	0.392353
31.3477	0.376967
31.366	0.405816
31.3843	0.440435
31.4027	0.388506
31.421	0.428896
31.4393	0.375043
31.4577	0.38466
31.476	0.365427
31.4943	0.403893
31.5127	0.321191
31.531	0.357734
31.5494	0.359657
31.5677	0.363503
31.586	0.346194
31.6044	0.305805
31.6227	0.340424
31.641	0.319268
31.6594	0.275032
31.6777	0.284648
31.6961	0.307728
31.7144	0.307728
31.7327	0.294265
31.7511	0.300035
31.7694	0.34427
31.7877	0.265415
31.8061	0.228873
31.8244	0.246182
31.8427	0.244259
31.8611	0.234642
31.8794	0.244259
31.8978	0.251952
31.9161	0.251952
31.9344	0.20387
31.9528	0.221179
31.9711	0.221179
31.9894	0.215409
32.0078	0.236566
32.0261	0.275032
32.0445	0.217333
32.0628	0.244259
32.0811	0.194253
32.0995	0.201946
32.1178	0.251952
32.1361	0.244259
32.1545	0.178867
32.1728	0.230796
32.1911	0.236566
32.2095	0.238489
32.2278	0.261569
32.2462	0.219256
32.2645	0.226949
32.2828	0.251952
32.3012	0.1981
32.3195	0.261569
32.3378	0.221179
32.3562	0.213486
32.3745	0.226949
32.3929	0.259645
32.4112	0.226949
32.4295	0.253875
32.4479	0.263492
32.4662	0.250029
32.4845	0.228873
32.5029	0.275032
32.5212	0.263492
32.5395	0.232719
32.5579	0.317344
32.5762	0.296188
32.5946	0.263492
32.6129	0.326961
32.6312	0.294265
32.6496	0.267339
32.6679	0.226949
32.6862	0.263492
32.7046	0.265415
32.7229	0.257722
32.7413	0.275032
32.7596	0.255799
32.7779	0.253875
32.7963	0.275032
32.8146	0.244259
32.8329	0.205793
32.8513	0.223103
32.8696	0.196176
32.888	0.232719
32.9063	0.205793
32.9246	0.244259
32.943	0.207716
32.9613	0.205793
32.9796	0.205793
32.998	0.201946
33.0163	0.207716
33.0346	0.173097
33.053	0.221179
33.0713	0.248106
33.0897	0.217333
33.108	0.200023
33.1263	0.230796
33.1447	0.263492
33.163	0.211563
33.1813	0.236566
33.1997	0.211563
33.218	0.219256
33.2364	0.236566
33.2547	0.196176
33.273	0.213486
33.2914	0.232719
33.3097	0.221179
33.328	0.201946
33.3464	0.20964
33.3647	0.211563
33.383	0.215409
33.4014	0.194253
33.4197	0.190407
33.4381	0.188483
33.4564	0.19233
33.4747	0.182713
33.4931	0.207716
33.5114	0.190407
33.5297	0.1981
33.5481	0.240412
33.5664	0.244259
33.5848	0.1981
33.6031	0.253875
33.6214	0.248106
33.6398	0.232719
33.6581	0.251952
33.6764	0.217333
33.6948	0.20964
33.7131	0.240412
33.7314	0.284648
33.7498	0.267339
33.7681	0.301958
33.7865	0.244259
33.8048	0.359657
33.8231	0.301958
33.8415	0.303881
33.8598	0.359657
33.8781	0.417356
33.8965	0.401969
33.9148	0.409663
33.9332	0.551987
33.9515	0.475055
33.9698	0.609686
33.9882	0.655845
34.0065	0.603916
34.0248	0.638535
34.0432	0.617379
34.0615	0.561603
34.0798	0.58276
34.0982	0.488518
34.1165	0.469285
34.1349	0.463515
34.1532	0.457745
34.1715	0.394276
34.1899	0.359657
34.2082	0.323114
34.2265	0.307728
34.2449	0.300035
34.2632	0.234642
34.2816	0.276955
34.2999	0.248106
34.3182	0.240412
34.3366	0.240412
34.3549	0.246182
34.3732	0.246182
34.3916	0.217333
34.4099	0.19233
34.4282	0.225026
34.4466	0.219256
34.4649	0.178867
34.4833	0.201946
34.5016	0.215409
34.5199	0.219256
34.5383	0.232719
34.5566	0.207716
34.5749	0.228873
34.5933	0.196176
34.6116	0.244259
34.63	0.171174
34.6483	0.196176
34.6666	0.19233
34.685	0.19233
34.7033	0.234642
34.7216	0.261569
34.74	0.176943
34.7583	0.196176
34.7767	0.236566
34.795	0.155787
34.8133	0.190407
34.8317	0.20964
34.85	0.213486
34.8683	0.205793
34.8867	0.225026
34.905	0.240412
34.9233	0.234642
34.9417	0.215409
34.96	0.20964
34.9784	0.18656
34.9967	0.176943
35.015	0.194253
35.0334	0.196176
35.0517	0.236566
35.07	0.20964
35.0884	0.230796
35.1067	0.20387
35.1251	0.219256
35.1434	0.20387
35.1617	0.196176
35.1801	0.18656
35.1984	0.1981
35.2167	0.1981
35.2351	0.225026
35.2534	0.219256
35.2717	0.234642
35.2901	0.232719
35.3084	0.257722
35.3268	0.225026
35.3451	0.238489
35.3634	0.205793
35.3818	0.201946
35.4001	0.234642
35.4184	0.217333
35.4368	0.267339
35.4551	0.250029
35.4735	0.253875
35.4918	0.236566
35.5101	0.292341
35.5285	0.282725
35.5468	0.323114
35.5651	0.342347
35.5835	0.338501
35.6018	0.386583
35.6201	0.415433
35.6385	0.37889
35.6568	0.436589
35.6752	0.446205
35.6935	0.415433
35.7118	0.409663
35.7302	0.401969
35.7485	0.430819
35.7668	0.365427
35.7852	0.332731
35.8035	0.363503
35.8219	0.317344
35.8402	0.309651
35.8585	0.328884
35.8769	0.294265
35.8952	0.305805
35.9135	0.265415
35.9319	0.267339
35.9502	0.223103
35.9685	0.259645
35.9869	0.215409
36.0052	0.232719
36.0236	0.282725
36.0419	0.273108
36.0602	0.217333
36.0786	0.240412
36.0969	0.263492
36.1152	0.242336
36.1336	0.196176
36.1519	0.17502
36.1703	0.223103
36.1886	0.215409
36.2069	0.223103
36.2253	0.250029
36.2436	0.215409
36.2619	0.213486
36.2803	0.17502
36.2986	0.234642
36.317	0.221179
36.3353	0.196176
36.3536	0.165404
36.372	0.173097
36.3903	0.234642
36.4086	0.194253
36.427	0.194253
36.4453	0.188483
36.4636	0.200023
36.482	0.205793
36.5003	0.221179
36.5187	0.1981
36.537	0.20964
36.5553	0.213486
36.5737	0.1981
36.592	0.217333
36.6103	0.217333
36.6287	0.1981
36.647	0.205793
36.6654	0.221179
36.6837	0.201946
36.702	0.244259
36.7204	0.196176
36.7387	0.213486
36.757	0.242336
36.7754	0.221179
36.7937	0.228873
36.812	0.234642
36.8304	0.215409
36.8487	0.257722
36.8671	0.20387
36.8854	0.221179
36.9037	0.225026
36.9221	0.207716
36.9404	0.232719
36.9587	0.165404
36.9771	0.1981
36.9954	0.165404
37.0138	0.176943
37.0321	0.246182
37.0504	0.165404
37.0688	0.17502
37.0871	0.18079
37.1054	0.16925
37.1238	0.173097
37.1421	0.1981
37.1604	0.165404
37.1788	0.1981
37.1971	0.188483
37.2155	0.178867
37.2338	0.194253
37.2521	0.1981
37.2705	0.161557
37.2888	0.205793
37.3071	0.16925
37.3255	0.201946
37.3438	0.167327
37.3622	0.228873
37.3805	0.16925
37.3988	0.215409
37.4172	0.20964
37.4355	0.148094
37.4538	0.18079
37.4722	0.178867
37.4905	0.20964
37.5088	0.19233
37.5272	0.223103
37.5455	0.207716
37.5639	0.201946
37.5822	0.217333
37.6005	0.19233
37.6189	0.176943
37.6372	0.200023
37.6555	0.201946
37.6739	0.159634
37.6922	0.176943
37.7106	0.201946
37.7289	0.161557
37.7472	0.211563
37.7656	0.19233
37.7839	0.165404
37.8022	0.165404
37.8206	0.194253
37.8389	0.148094
37.8573	0.200023
37.8756	0.184637
37.8939	0.188483
37.9123	0.19233
37.9306	0.188483
37.9489	0.19233
37.9673	0.18079
37.9856	0.182713
38.0039	0.16925
38.0223	0.165404
38.0406	0.228873
38.059	0.165404
38.0773	0.221179
38.0956	0.188483
38.114	0.17502
38.1323	0.194253
38.1506	0.157711
38.169	0.20387
38.1873	0.176943
38.2057	0.182713
38.224	0.188483
38.2423	0.1981
38.2607	0.159634
38.279	0.155787
38.2973	0.184637
38.3157	0.194253
38.334	0.178867
38.3523	0.18079
38.3707	0.205793
38.389	0.151941
38.4074	0.161557
38.4257	0.176943
38.444	0.167327
38.4624	0.1981
38.4807	0.196176
38.499	0.150017
38.5174	0.159634
38.5357	0.18656
38.5541	0.159634
38.5724	0.157711
38.5907	0.190407
38.6091	0.1981
38.6274	0.171174
38.6457	0.221179
38.6641	0.1981
38.6824	0.188483
38.7007	0.196176
38.7191	0.221179
38.7374	0.176943
38.7558	0.207716
38.7741	0.201946
38.7924	0.16348
38.8108	0.225026
38.8291	0.20964
38.8474	0.228873
38.8658	0.230796
38.8841	0.178867
38.9025	0.207716
38.9208	0.20387
38.9391	0.251952
38.9575	0.221179
38.9758	0.263492
38.9941	0.253875
39.0125	0.20964
39.0308	0.228873
39.0491	0.207716
39.0675	0.221179
39.0858	0.250029
39.1042	0.240412
39.1225	0.248106
39.1408	0.228873
39.1592	0.242336
39.1775	0.257722
39.1958	0.267339
39.2142	0.225026
39.2325	0.205793
39.2509	0.20964
39.2692	0.228873
39.2875	0.234642
39.3059	0.200023
39.3242	0.188483
39.3425	0.234642
39.3609	0.1981
39.3792	0.188483
39.3975	0.207716
39.4159	0.217333
39.4342	0.211563
39.4526	0.200023
39.4709	0.155787
39.4892	0.194253
39.5076	0.265415
39.5259	0.217333
39.5442	0.219256
39.5626	0.232719
39.5809	0.18656
39.5993	0.200023
39.6176	0.215409
39.6359	0.234642
39.6543	0.232719
39.6726	0.261569
39.6909	0.246182
39.7093	0.290418
39.7276	0.321191
39.746	0.325038
39.7643	0.307728
39.7826	0.288495
39.801	0.34427
39.8193	0.334654
39.8376	0.334654
39.856	0.311574
39.8743	0.294265
39.8926	0.286572
39.911	0.280802
39.9293	0.273108
39.9477	0.263492
39.966	0.251952
39.9843	0.257722
40.0027	0.228873
40.021	0.255799
40.0393	0.201946
40.0577	0.207716
40.076	0.236566
40.0944	0.201946
40.1127	0.251952
40.131	0.201946
40.1494	0.232719
40.1677	0.205793
40.186	0.242336
40.2044	0.246182
40.2227	0.253875
40.241	0.238489
40.2594	0.234642
40.2777	0.225026
40.2961	0.228873
40.3144	0.265415
40.3327	0.211563
40.3511	0.226949
40.3694	0.217333
40.3877	0.219256
40.4061	0.223103
40.4244	0.251952
40.4428	0.238489
40.4611	0.223103
40.4794	0.196176
40.4978	0.221179
40.5161	0.234642
40.5344	0.236566
[truncated: 1,056 more rows]

## Sheet: Heating 115 °C
2theta	Intensity
3.89731	1.48479
3.91565	1.51364
3.93399	1.47517
3.95232	1.40785
3.97066	1.4367
3.989	1.39631
4.00733	1.48286
4.02567	1.45594
4.04401	1.45594
4.06234	1.40593
4.08068	1.38093
4.09902	1.35016
4.11735	1.49248
4.13569	1.37708
4.15403	1.34823
4.17237	1.41555
4.1907	1.29823
4.20904	1.38093
4.22738	1.4117
4.24571	1.38285
4.26405	1.42324
4.28239	1.36554
4.30072	1.42516
4.31906	1.2386
4.3374	1.28092
4.35573	1.34246
4.37407	1.27899
4.39241	1.35208
4.41075	1.28861
4.42908	1.26361
4.44742	1.40208
4.46576	1.25399
4.48409	1.28284
4.50243	1.32708
4.52077	1.26553
4.5391	1.32323
4.55744	1.24053
4.57578	1.18668
4.59411	1.14244
4.61245	1.12513
4.63079	1.27322
4.64913	1.25591
4.66746	1.22706
4.6858	1.23476
4.70414	1.1309
4.72247	1.10397
4.74081	1.14821
4.75915	1.28284
4.77748	1.22899
4.79582	1.23091
4.81416	1.20014
4.83249	1.16744
4.85083	1.20399
4.86917	1.26168
4.8875	1.23283
4.90584	1.14821
4.92418	1.18091
4.94252	1.18283
4.96085	1.20206
4.97919	1.23668
4.99753	1.13859
5.01586	1.1559
5.0342	1.22706
5.05254	1.1309
5.07087	1.15013
5.08921	1.1886
5.10755	1.07512
5.12588	1.13475
5.14422	1.04627
5.16256	1.02704
5.1809	1.09243
5.19923	1.15398
5.21757	1.17898
5.23591	1.16552
5.25424	1.15206
5.27258	1.12321
5.29092	1.11936
5.30925	1.14629
5.32759	1.13667
5.34593	1.08474
5.36426	1.18668
5.3826	1.0732
5.40094	1.07128
5.41927	1.10782
5.43761	1.13282
5.45595	1.17321
5.47429	1.07128
5.49262	1.17129
5.51096	1.22706
5.5293	1.12705
5.54763	1.13667
5.56597	1.15013
5.58431	1.20014
5.60264	1.15975
5.62098	1.1636
5.63932	1.18091
5.65765	1.18091
5.67599	1.02512
5.69433	1.18091
5.71267	1.19052
5.731	1.02319
5.74934	1.12705
5.76768	1.18283
5.78601	1.10013
5.80435	1.18475
5.82269	1.20591
5.84102	1.20591
5.85936	1.23283
5.8777	1.25014
5.89603	1.22322
5.91437	1.15206
5.93271	1.18668
5.95104	1.29438
5.96938	1.35016
5.98772	1.26168
6.00606	1.27322
6.02439	1.24245
6.04273	1.27707
6.06107	1.3867
6.0794	1.4367
6.09774	1.41939
6.11608	1.36939
6.13441	1.43863
6.15275	1.47902
6.17109	1.44824
6.18942	1.55595
6.20776	1.53095
6.2261	1.60403
6.24444	1.63865
6.26277	1.7252
6.28111	1.70789
6.29945	1.69058
6.31778	1.84637
6.33612	1.84252
6.35446	1.85983
6.37279	1.95407
6.39113	1.91176
6.40947	2.11371
6.4278	2.25988
6.44614	2.27911
6.46448	2.43682
6.48282	2.53491
6.50115	2.65031
6.51949	2.58491
6.53783	2.89264
6.55616	3.00612
6.5745	3.0542
6.59284	3.32346
6.61117	3.75043
6.62951	3.90237
6.64785	4.14856
6.66618	4.49283
6.68452	4.64477
6.70286	4.81209
6.72119	5.1679
6.73953	5.47563
6.75787	5.87568
6.77621	6.09109
6.79454	6.59884
6.81288	7.22391
6.83122	7.5778
6.84955	8.16825
6.86789	8.90872
6.88623	9.76651
6.90456	10.8686
6.9229	11.7975
6.94124	12.7207
6.95957	13.9189
6.97791	15.4268
6.99625	16.7039
7.01459	18.2983
7.03292	19.8581
7.05126	22.0949
7.0696	24.147
7.08793	26.1684
7.10627	29.2438
7.12461	31.5171
7.14294	35.0175
7.16128	38.6314
7.17962	43.3915
7.19795	49.0884
7.21629	55.391
7.23463	63.3304
7.25296	72.5815
7.2713	83.4769
7.28964	96.6188
7.30798	110.574
7.32631	126.238
7.34465	138.52
7.36299	144.801
7.38132	139.126
7.39966	118.041
7.418	93.5781
7.43633	69.5619
7.45467	50.7424
7.47301	35.3272
7.49134	25.4029
7.50968	19.8734
7.52802	15.7518
7.54636	12.288
7.56469	8.73562
7.58303	6.51998
7.60137	4.61592
7.6197	3.63696
7.63804	2.95611
7.65638	2.79071
7.67471	2.46759
7.69305	2.39258
7.71139	2.05024
7.72972	1.94446
7.74806	1.76559
7.7664	1.74059
7.78473	1.64827
7.80307	1.5848
7.82141	1.5521
7.83975	1.45786
7.85808	1.33285
7.87642	1.23283
7.89476	1.29823
7.91309	1.19245
7.93143	1.20014
7.94977	1.11167
7.9681	1.17129
7.98644	1.02896
8.00478	1.13667
8.02311	0.984729
8.04145	1.03089
8.05979	1.00781
8.07813	0.90395
8.09646	0.90972
8.1148	0.877024
8.13314	0.928953
8.15147	0.830865
8.16981	0.832788
8.18815	0.802016
8.20648	0.878948
8.22482	0.782783
8.24316	0.794322
8.26149	0.796246
8.27983	0.759703
8.29817	0.784706
8.3165	0.72316
8.33484	0.748163
8.35318	0.736623
8.37152	0.74624
8.38985	0.690464
8.40819	0.72893
8.42653	0.719314
8.44486	0.709697
8.4632	0.623149
8.48154	0.738547
8.49987	0.642382
8.51821	0.671231
8.53655	0.632765
8.55488	0.661615
8.57322	0.632765
8.59156	0.671231
8.6099	0.607762
8.62823	0.55968
8.64657	0.55968
8.66491	0.596223
8.68324	0.601993
8.70158	0.661615
8.71992	0.588529
8.73825	0.615456
8.75659	0.592376
8.77493	0.590453
8.79326	0.578913
8.8116	0.55391
8.82994	0.596223
8.84828	0.57122
8.86661	0.598146
8.88495	0.626995
8.90329	0.605839
8.92162	0.590453
8.93996	0.575066
8.9583	0.578913
8.97663	0.486595
8.99497	0.528907
9.01331	0.598146
9.03164	0.561603
9.04998	0.550063
9.06832	0.511597
9.08665	0.503904
9.10499	0.528907
9.12333	0.615456
9.14167	0.551987
9.16	0.494288
9.17834	0.603916
9.19668	0.54814
9.21501	0.498134
9.23335	0.5366
9.25169	0.486595
9.27002	0.555833
9.28836	0.496211
9.3067	0.486595
9.32503	0.507751
9.34337	0.534677
9.36171	0.525061
9.38005	0.567373
9.39838	0.498134
9.41672	0.436589
9.43506	0.482748
9.45339	0.521214
9.47173	0.507751
9.49007	0.509674
9.5084	0.56545
9.52674	0.5366
9.54508	0.53083
9.56341	0.469285
9.58175	0.515444
9.60009	0.511597
9.61842	0.469285
9.63676	0.459668
9.6551	0.486595
9.67344	0.459668
9.69177	0.509674
9.71011	0.525061
9.72845	0.473132
9.74678	0.478901
9.76512	0.461592
9.78346	0.469285
9.80179	0.507751
9.82013	0.475055
9.83847	0.475055
9.8568	0.426972
9.87514	0.480825
9.89348	0.525061
9.91182	0.521214
9.93015	0.496211
9.94849	0.494288
9.96683	0.465438
9.98516	0.457745
10.0035	0.465438
10.0218	0.411586
10.0402	0.480825
10.0585	0.413509
10.0768	0.465438
10.0952	0.465438
10.1135	0.442359
10.1319	0.475055
10.1502	0.425049
10.1685	0.567373
10.1869	0.434666
10.2052	0.444282
10.2235	0.461592
10.2419	0.448129
10.2602	0.450052
10.2786	0.463515
10.2969	0.450052
10.3152	0.461592
10.3336	0.440435
10.3519	0.446205
10.3702	0.475055
10.3886	0.436589
10.4069	0.450052
10.4252	0.425049
10.4436	0.446205
10.4619	0.480825
10.4803	0.426972
10.4986	0.453899
10.5169	0.457745
10.5353	0.434666
10.5536	0.428896
10.5719	0.451975
10.5903	0.3962
10.6086	0.461592
10.627	0.442359
10.6453	0.428896
10.6636	0.457745
10.682	0.448129
10.7003	0.417356
10.7186	0.421202
10.737	0.421202
10.7553	0.425049
10.7736	0.398123
10.792	0.432742
10.8103	0.413509
10.8287	0.426972
10.847	0.413509
10.8653	0.36735
10.8837	0.411586
10.902	0.436589
10.9203	0.432742
10.9387	0.3962
10.957	0.494288
10.9754	0.463515
10.9937	0.351964
11.012	0.438512
11.0304	0.415433
11.0487	0.39043
11.067	0.448129
11.0854	0.453899
11.1037	0.392353
11.1221	0.407739
11.1404	0.451975
11.1587	0.409663
11.1771	0.423126
11.1954	0.380813
11.2137	0.430819
11.2321	0.413509
11.2504	0.448129
11.2687	0.403893
11.2871	0.413509
11.3054	0.363503
11.3238	0.35581
11.3421	0.3962
11.3604	0.380813
11.3788	0.400046
11.3971	0.400046
11.4154	0.38466
11.4338	0.35581
11.4521	0.407739
11.4705	0.36735
11.4888	0.380813
11.5071	0.428896
11.5255	0.398123
11.5438	0.386583
11.5621	0.328884
11.5805	0.369273
11.5988	0.409663
11.6171	0.386583
11.6355	0.369273
11.6538	0.376967
11.6722	0.419279
11.6905	0.3962
11.7088	0.376967
11.7272	0.409663
11.7455	0.37312
11.7638	0.375043
11.7822	0.371197
11.8005	0.359657
11.8189	0.388506
11.8372	0.37889
11.8555	0.38466
11.8739	0.3962
11.8922	0.421202
11.9105	0.382736
11.9289	0.419279
11.9472	0.407739
11.9655	0.37889
11.9839	0.35581
12.0022	0.369273
12.0206	0.409663
12.0389	0.400046
12.0572	0.375043
12.0756	0.426972
12.0939	0.436589
12.1122	0.405816
12.1306	0.39043
12.1489	0.37312
12.1673	0.369273
12.1856	0.417356
12.2039	0.39043
12.2223	0.438512
12.2406	0.423126
12.2589	0.426972
12.2773	0.438512
12.2956	0.444282
12.3139	0.467362
12.3323	0.455822
12.3506	0.444282
12.369	0.525061
12.3873	0.503904
12.4056	0.513521
12.424	0.459668
12.4423	0.515444
12.4606	0.55968
12.479	0.594299
12.4973	0.630842
12.5157	0.665461
12.534	0.719314
12.5523	0.76932
12.5707	0.74624
12.589	0.90395
12.6073	0.942416
12.6257	1.03281
12.644	1.21937
12.6624	1.43478
12.6807	1.60788
12.699	1.84637
12.7174	2.13102
12.7357	2.28103
12.754	2.37912
12.7724	2.41374
12.7907	2.20795
12.809	2.15025
12.8274	1.53672
12.8457	1.15206
12.8641	0.917414
12.8824	0.730854
12.9007	0.700081
12.9191	0.636612
12.9374	0.575066
12.9557	0.505828
12.9741	0.463515
12.9924	0.440435
13.0108	0.444282
13.0291	0.403893
13.0474	0.430819
13.0658	0.453899
13.0841	0.436589
13.1024	0.386583
13.1208	0.401969
13.1391	0.450052
13.1574	0.419279
13.1758	0.371197
13.1941	0.371197
13.2125	0.348117
13.2308	0.428896
13.2491	0.405816
13.2675	0.334654
13.2858	0.386583
13.3041	0.39043
13.3225	0.326961
13.3408	0.300035
13.3592	0.37312
13.3775	0.326961
13.3958	0.357734
13.4142	0.36735
13.4325	0.36735
13.4508	0.36735
13.4692	0.369273
13.4875	0.342347
13.5058	0.36735
13.5242	0.315421
13.5425	0.359657
13.5609	0.35581
13.5792	0.411586
13.5975	0.313498
13.6159	0.330807
13.6342	0.36158
13.6525	0.353887
13.6709	0.38466
13.6892	0.307728
13.7076	0.353887
13.7259	0.382736
13.7442	0.334654
13.7626	0.38466
13.7809	0.340424
13.7992	0.363503
13.8176	0.37889
13.8359	0.37889
13.8542	0.363503
13.8726	0.323114
13.8909	0.394276
13.9093	0.351964
13.9276	0.325038
13.9459	0.342347
13.9643	0.313498
13.9826	0.351964
14.0009	0.357734
14.0193	0.388506
14.0376	0.382736
14.056	0.317344
14.0743	0.36158
14.0926	0.35004
14.111	0.351964
14.1293	0.376967
14.1476	0.319268
14.166	0.357734
14.1843	0.340424
14.2026	0.340424
14.221	0.369273
14.2393	0.336577
14.2577	0.398123
14.276	0.34427
14.2943	0.363503
14.3127	0.386583
14.331	0.353887
14.3493	0.35581
14.3677	0.315421
14.386	0.401969
14.4044	0.369273
14.4227	0.401969
14.441	0.380813
14.4594	0.3962
14.4777	0.334654
14.496	0.330807
14.5144	0.36735
14.5327	0.398123
14.5511	0.409663
14.5694	0.38466
14.5877	0.36735
14.6061	0.459668
14.6244	0.409663
14.6427	0.37889
14.6611	0.471208
14.6794	0.486595
14.6977	0.413509
14.7161	0.421202
14.7344	0.473132
14.7528	0.450052
14.7711	0.409663
14.7894	0.496211
14.8078	0.359657
14.8261	0.400046
14.8444	0.35004
14.8628	0.371197
14.8811	0.353887
14.8995	0.409663
14.9178	0.313498
14.9361	0.313498
14.9545	0.37889
14.9728	0.348117
14.9911	0.375043
15.0095	0.342347
15.0278	0.346194
15.0461	0.380813
15.0645	0.34427
15.0828	0.330807
15.1012	0.357734
15.1195	0.34427
15.1378	0.342347
15.1562	0.313498
15.1745	0.388506
15.1928	0.35581
15.2112	0.342347
15.2295	0.313498
15.2479	0.321191
15.2662	0.340424
15.2845	0.35004
15.3029	0.332731
15.3212	0.336577
15.3395	0.36158
15.3579	0.309651
15.3762	0.348117
15.3945	0.305805
15.4129	0.36735
15.4312	0.369273
15.4496	0.325038
15.4679	0.332731
15.4862	0.357734
15.5046	0.369273
15.5229	0.363503
15.5412	0.351964
15.5596	0.369273
15.5779	0.371197
15.5963	0.348117
15.6146	0.346194
15.6329	0.411586
15.6513	0.340424
15.6696	0.342347
15.6879	0.432742
15.7063	0.417356
15.7246	0.36735
15.7429	0.419279
15.7613	0.440435
15.7796	0.515444
15.798	0.467362
15.8163	0.492365
15.8346	0.563527
15.853	0.575066
15.8713	0.594299
15.8896	0.505828
15.908	0.605839
15.9263	0.678924
15.9447	0.646228
15.963	0.684694
15.9813	0.638535
15.9997	0.705851
16.018	0.609686
16.0363	0.594299
16.0547	0.657768
16.073	0.546217
16.0914	0.551987
16.1097	0.475055
16.128	0.476978
16.1464	0.461592
16.1647	0.448129
16.183	0.432742
16.2014	0.428896
16.2197	0.376967
16.238	0.401969
16.2564	0.413509
16.2747	0.376967
16.2931	0.394276
16.3114	0.351964
16.3297	0.376967
16.3481	0.353887
16.3664	0.328884
16.3847	0.346194
16.4031	0.38466
16.4214	0.39043
16.4398	0.340424
16.4581	0.359657
16.4764	0.34427
16.4948	0.39043
16.5131	0.330807
16.5314	0.351964
16.5498	0.332731
16.5681	0.36735
16.5864	0.365427
16.6048	0.363503
16.6231	0.407739
16.6415	0.336577
16.6598	0.36735
16.6781	0.300035
16.6965	0.369273
16.7148	0.340424
16.7331	0.315421
16.7515	0.371197
16.7698	0.348117
16.7882	0.323114
16.8065	0.307728
16.8248	0.330807
16.8432	0.394276
16.8615	0.340424
16.8798	0.417356
16.8982	0.342347
16.9165	0.359657
16.9348	0.332731
16.9532	0.359657
16.9715	0.300035
16.9899	0.36158
17.0082	0.359657
17.0265	0.342347
17.0449	0.353887
17.0632	0.351964
17.0815	0.35581
17.0999	0.363503
17.1182	0.340424
17.1366	0.332731
17.1549	0.405816
17.1732	0.38466
17.1916	0.400046
17.2099	0.417356
17.2282	0.334654
17.2466	0.400046
17.2649	0.400046
17.2832	0.353887
17.3016	0.450052
17.3199	0.409663
17.3383	0.426972
17.3566	0.461592
17.3749	0.455822
17.3933	0.496211
17.4116	0.463515
17.4299	0.413509
17.4483	0.498134
17.4666	0.544294
17.485	0.569296
17.5033	0.517367
17.5216	0.609686
17.54	0.600069
17.5583	0.711621
17.5766	0.698157
17.595	0.694311
17.6133	0.74047
17.6316	0.732777
17.65	0.732777
17.6683	0.680848
17.6867	0.640459
17.705	0.669308
17.7233	0.605839
17.7417	0.5366
17.76	0.490441
17.7783	0.473132
17.7967	0.513521
17.815	0.478901
17.8334	0.459668
17.8517	0.426972
17.87	0.517367
17.8884	0.413509
17.9067	0.415433
17.925	0.375043
17.9434	0.388506
17.9617	0.425049
17.9801	0.430819
17.9984	0.467362
18.0167	0.440435
18.0351	0.444282
18.0534	0.465438
18.0717	0.473132
18.0901	0.428896
18.1084	0.434666
18.1267	0.409663
18.1451	0.509674
18.1634	0.465438
18.1818	0.450052
18.2001	0.35581
18.2184	0.436589
18.2368	0.401969
18.2551	0.471208
18.2734	0.442359
18.2918	0.403893
18.3101	0.438512
18.3285	0.380813
18.3468	0.415433
18.3651	0.386583
18.3835	0.38466
18.4018	0.359657
18.4201	0.451975
18.4385	0.461592
18.4568	0.415433
18.4751	0.421202
18.4935	0.434666
18.5118	0.421202
18.5302	0.382736
18.5485	0.394276
18.5668	0.467362
18.5852	0.425049
18.6035	0.382736
18.6218	0.467362
18.6402	0.394276
18.6585	0.430819
18.6769	0.457745
18.6952	0.478901
18.7135	0.453899
18.7319	0.471208
18.7502	0.507751
18.7685	0.37889
18.7869	0.446205
18.8052	0.482748
18.8235	0.500058
18.8419	0.475055
18.8602	0.488518
18.8786	0.442359
18.8969	0.469285
18.9152	0.473132
18.9336	0.448129
18.9519	0.463515
18.9702	0.490441
18.9886	0.505828
19.0069	0.505828
19.0253	0.550063
19.0436	0.567373
19.0619	0.523137
19.0803	0.551987
19.0986	0.573143
19.1169	0.590453
19.1353	0.578913
19.1536	0.648152
19.1719	0.711621
19.1903	0.75201
19.2086	0.794322
19.227	0.888564
19.2453	0.817402
19.2636	0.888564
19.282	0.9328
19.3003	1.0732
19.3186	1.1309
19.337	1.28861
19.3553	1.44247
19.3737	1.69443
19.392	1.93676
19.4103	2.39066
19.4287	2.70608
19.447	3.41578
19.4653	3.94661
19.4837	4.89864
19.502	6.02954
19.5204	6.9585
19.5387	7.74705
19.557	8.42982
19.5754	8.3048
19.5937	8.0817
19.612	6.88541
19.6304	5.78336
19.6487	4.56399
19.667	3.45424
19.6854	2.68685
19.7037	2.00215
19.7221	1.61172
19.7404	1.42324
19.7587	1.17898
19.7771	1.02127
19.7954	1.00589
19.8137	0.873178
19.8321	0.850098
19.8504	0.817402
19.8688	0.748163
19.8871	0.625072
19.9054	0.661615
19.9238	0.58276
19.9421	0.580836
19.9604	0.605839
19.9788	0.526984
19.9971	0.53083
20.0154	0.58276
20.0338	0.54814
20.0521	0.603916
20.0705	0.490441
20.0888	0.523137
20.1071	0.484671
20.1255	0.519291
20.1438	0.494288
20.1621	0.403893
20.1805	0.496211
20.1988	0.501981
20.2172	0.478901
20.2355	0.523137
20.2538	0.490441
20.2722	0.448129
20.2905	0.501981
20.3088	0.450052
20.3272	0.465438
20.3455	0.434666
20.3638	0.430819
20.3822	0.419279
20.4005	0.448129
20.4189	0.455822
20.4372	0.484671
20.4555	0.511597
20.4739	0.501981
20.4922	0.482748
20.5105	0.475055
20.5289	0.551987
20.5472	0.432742
20.5656	0.534677
20.5839	0.496211
20.6022	0.567373
20.6206	0.476978
20.6389	0.544294
20.6572	0.513521
20.6756	0.532754
20.6939	0.471208
20.7122	0.501981
20.7306	0.480825
20.7489	0.534677
20.7673	0.507751
20.7856	0.494288
20.8039	0.526984
20.8223	0.54237
20.8406	0.505828
20.8589	0.521214
20.8773	0.580836
20.8956	0.575066
20.914	0.521214
20.9323	0.611609
20.9506	0.58276
20.969	0.596223
20.9873	0.592376
21.0056	0.630842
21.024	0.580836
21.0423	0.615456
21.0607	0.557757
21.079	0.573143
21.0973	0.540447
21.1157	0.598146
21.134	0.544294
21.1523	0.500058
21.1707	0.532754
21.189	0.538524
21.2073	0.519291
21.2257	0.590453
21.244	0.546217
21.2624	0.557757
21.2807	0.528907
21.299	0.509674
21.3174	0.601993
21.3357	0.54814
21.354	0.53083
21.3724	0.607762
21.3907	0.569296
21.4091	0.600069
21.4274	0.651998
21.4457	0.603916
21.4641	0.715467
21.4824	0.632765
21.5007	0.727007
21.5191	0.782783
21.5374	0.844328
21.5557	0.871254
21.5741	1.03089
21.5924	0.994345
21.6108	1.10782
21.6291	1.27322
21.6474	1.41939
21.6658	1.52902
21.6841	1.7002
21.7024	1.8656
21.7208	2.15217
21.7391	2.29065
21.7575	2.60222
21.7758	2.80417
21.7941	3.07343
21.8125	3.19652
21.8308	2.95034
21.8491	3.09459
21.8675	2.84841
21.8858	2.58299
21.9041	2.25411
21.9225	2.16179
21.9408	1.93676
21.9592	1.65981
21.9775	1.51556
21.9958	1.36939
22.0142	1.31938
22.0325	1.18091
22.0508	1.11936
22.0692	1.0732
22.0875	1.1059
22.1059	1.15013
22.1242	1.13475
22.1425	1.14821
22.1609	1.32708
22.1792	1.38285
22.1975	1.4944
22.2159	1.50017
22.2342	1.70212
22.2525	1.56364
22.2709	1.44824
22.2892	1.21552
22.3076	1.19052
22.3259	1.0482
22.3442	1.00781
22.3626	0.969343
22.3809	0.884717
22.3992	0.848175
22.4176	0.775089
22.4359	0.753933
22.4543	0.648152
22.4726	0.651998
22.4909	0.634689
22.5093	0.498134
22.5276	0.578913
22.5459	0.528907
22.5643	0.540447
22.5826	0.453899
22.6009	0.492365
22.6193	0.471208
22.6376	0.450052
22.656	0.482748
22.6743	0.498134
22.6926	0.492365
22.711	0.476978
22.7293	0.492365
22.7476	0.446205
22.766	0.476978
22.7843	0.498134
22.8027	0.469285
22.821	0.484671
22.8393	0.467362
22.8577	0.421202
22.876	0.413509
22.8943	0.469285
22.9127	0.419279
22.931	0.392353
22.9494	0.419279
22.9677	0.425049
22.986	0.388506
23.0044	0.509674
23.0227	0.403893
23.041	0.450052
23.0594	0.403893
23.0777	0.426972
23.096	0.444282
23.1144	0.425049
23.1327	0.405816
23.1511	0.39043
23.1694	0.461592
23.1877	0.457745
23.2061	0.375043
23.2244	0.451975
23.2427	0.457745
23.2611	0.405816
23.2794	0.453899
23.2978	0.450052
23.3161	0.432742
23.3344	0.501981
23.3528	0.486595
23.3711	0.432742
23.3894	0.465438
23.4078	0.488518
23.4261	0.486595
23.4444	0.503904
23.4628	0.473132
23.4811	0.501981
23.4995	0.492365
23.5178	0.436589
23.5361	0.436589
23.5545	0.480825
23.5728	0.467362
23.5911	0.484671
23.6095	0.438512
23.6278	0.407739
23.6462	0.398123
23.6645	0.421202
23.6828	0.413509
23.7012	0.409663
23.7195	0.482748
23.7378	0.426972
23.7562	0.434666
23.7745	0.457745
23.7928	0.388506
23.8112	0.432742
23.8295	0.39043
23.8479	0.411586
23.8662	0.423126
23.8845	0.471208
23.9029	0.471208
23.9212	0.473132
23.9395	0.450052
23.9579	0.496211
23.9762	0.55391
23.9946	0.53083
24.0129	0.609686
24.0312	0.53083
24.0496	0.640459
24.0679	0.648152
24.0862	0.702004
24.1046	0.767396
24.1229	0.790476
24.1412	0.959726
24.1596	0.877024
24.1779	1.0155
24.1963	1.14436
24.2146	1.19822
24.2329	1.2463
24.2513	1.25784
24.2696	1.21745
24.2879	1.21937
24.3063	0.998192
24.3246	1.08282
24.343	0.925107
24.3613	0.832788
24.3796	0.873178
24.398	0.759703
24.4163	0.696234
24.4346	0.678924
24.453	0.626995
24.4713	0.636612
24.4897	0.634689
24.508	0.617379
24.5263	0.580836
24.5447	0.655845
24.563	0.601993
24.5813	0.513521
24.5997	0.5366
24.618	0.563527
24.6363	0.590453
24.6547	0.600069
24.673	0.590453
24.6914	0.54814
24.7097	0.592376
24.728	0.5366
24.7464	0.53083
24.7647	0.500058
24.783	0.500058
24.8014	0.473132
24.8197	0.482748
24.8381	0.432742
24.8564	0.478901
24.8747	0.409663
24.8931	0.405816
24.9114	0.432742
24.9297	0.39043
24.9481	0.417356
24.9664	0.375043
24.9847	0.309651
25.0031	0.392353
25.0214	0.36735
25.0398	0.369273
25.0581	0.375043
25.0764	0.388506
25.0948	0.35581
25.1131	0.298111
25.1314	0.301958
25.1498	0.351964
25.1681	0.340424
25.1865	0.380813
25.2048	0.336577
25.2231	0.342347
25.2415	0.338501
25.2598	0.380813
25.2781	0.342347
25.2965	0.357734
25.3148	0.37312
25.3331	0.38466
25.3515	0.330807
25.3698	0.348117
25.3882	0.35581
25.4065	0.340424
25.4248	0.34427
25.4432	0.319268
25.4615	0.359657
25.4798	0.39043
25.4982	0.369273
25.5165	0.353887
25.5349	0.38466
25.5532	0.386583
25.5715	0.365427
25.5899	0.336577
25.6082	0.407739
25.6265	0.446205
25.6449	0.444282
25.6632	0.398123
25.6815	0.450052
25.6999	0.507751
25.7182	0.521214
25.7366	0.475055
25.7549	0.494288
25.7732	0.528907
25.7916	0.498134
25.8099	0.423126
25.8282	0.490441
25.8466	0.475055
25.8649	0.463515
25.8833	0.386583
25.9016	0.353887
25.9199	0.394276
25.9383	0.411586
25.9566	0.353887
25.9749	0.351964
25.9933	0.351964
26.0116	0.326961
26.0299	0.37889
26.0483	0.37889
26.0666	0.369273
26.085	0.326961
26.1033	0.348117
26.1216	0.37312
26.14	0.303881
26.1583	0.351964
26.1766	0.315421
26.195	0.338501
26.2133	0.325038
26.2317	0.35581
26.25	0.315421
26.2683	0.346194
26.2867	0.328884
26.305	0.334654
26.3233	0.334654
26.3417	0.323114
26.36	0.300035
26.3784	0.321191
26.3967	0.282725
26.415	0.309651
26.4334	0.298111
26.4517	0.301958
26.47	0.305805
26.4884	0.296188
26.5067	0.315421
26.525	0.301958
26.5434	0.36158
26.5617	0.371197
26.5801	0.311574
26.5984	0.36158
26.6167	0.409663
26.6351	0.369273
26.6534	0.365427
26.6717	0.436589
26.6901	0.436589
26.7084	0.440435
26.7268	0.5366
26.7451	0.496211
26.7634	0.534677
26.7818	0.56545
26.8001	0.586606
26.8184	0.528907
26.8368	0.551987
26.8551	0.528907
26.8734	0.503904
26.8918	0.475055
26.9101	0.444282
26.9285	0.386583
26.9468	0.409663
26.9651	0.415433
26.9835	0.328884
27.0018	0.37312
27.0201	0.382736
27.0385	0.398123
27.0568	0.37312
27.0752	0.400046
27.0935	0.388506
27.1118	0.371197
27.1302	0.34427
27.1485	0.430819
27.1668	0.421202
27.1852	0.39043
27.2035	0.405816
27.2218	0.403893
27.2402	0.428896
27.2585	0.490441
27.2769	0.475055
27.2952	0.444282
27.3135	0.55391
27.3319	0.588529
27.3502	0.650075
27.3685	0.703927
27.3869	0.75201
27.4052	0.815479
27.4236	0.907797
27.4419	0.988576
27.4602	0.990499
27.4786	1.03089
27.4969	1.02512
27.5152	1.03089
27.5336	1.01743
27.5519	1.06166
27.5702	0.861638
27.5886	0.871254
27.6069	0.778936
27.6253	0.694311
27.6436	0.613532
27.6619	0.592376
27.6803	0.598146
27.6986	0.561603
27.7169	0.455822
27.7353	0.5366
27.7536	0.459668
27.772	0.498134
27.7903	0.425049
27.8086	0.388506
27.827	0.490441
27.8453	0.423126
27.8636	0.37889
27.882	0.403893
27.9003	0.386583
27.9187	0.398123
27.937	0.357734
27.9553	0.334654
27.9737	0.369273
27.992	0.388506
28.0103	0.37312
28.0287	0.411586
28.047	0.357734
28.0653	0.340424
28.0837	0.348117
28.102	0.340424
28.1204	0.37889
28.1387	0.426972
28.157	0.426972
28.1754	0.398123
28.1937	0.400046
28.212	0.451975
28.2304	0.405816
28.2487	0.436589
28.2671	0.453899
28.2854	0.55391
28.3037	0.482748
28.3221	0.519291
28.3404	0.540447
28.3587	0.57122
28.3771	0.680848
28.3954	0.815479
28.4137	0.844328
28.4321	0.900104
28.4504	0.94434
28.4688	1.03089
28.4871	1.00204
28.5054	1.05974
28.5238	1.10397
28.5421	1.01935
28.5604	1.00204
28.5788	0.940493
28.5971	0.805862
28.6155	0.72316
28.6338	0.677001
28.6521	0.603916
28.6705	0.621226
28.6888	0.525061
28.7071	0.526984
28.7255	0.517367
28.7438	0.461592
28.7621	0.440435
28.7805	0.409663
28.7988	0.444282
28.8172	0.380813
28.8355	0.338501
28.8538	0.346194
28.8722	0.346194
28.8905	0.319268
28.9088	0.315421
28.9272	0.328884
28.9455	0.265415
28.9639	0.319268
28.9822	0.298111
29.0005	0.319268
29.0189	0.280802
29.0372	0.336577
29.0555	0.265415
29.0739	0.288495
29.0922	0.278878
29.1105	0.292341
29.1289	0.282725
29.1472	0.248106
29.1656	0.286572
29.1839	0.284648
29.2022	0.305805
29.2206	0.255799
29.2389	0.230796
29.2572	0.294265
29.2756	0.257722
29.2939	0.263492
29.3123	0.255799
29.3306	0.273108
29.3489	0.315421
29.3673	0.255799
29.3856	0.271185
29.4039	0.278878
29.4223	0.271185
29.4406	0.298111
29.459	0.328884
29.4773	0.307728
29.4956	0.292341
29.514	0.251952
29.5323	0.300035
29.5506	0.284648
29.569	0.353887
29.5873	0.326961
29.6056	0.323114
29.624	0.323114
29.6423	0.278878
29.6607	0.309651
29.679	0.282725
29.6973	0.290418
29.7157	0.294265
29.734	0.311574
29.7523	0.267339
29.7707	0.261569
29.789	0.342347
29.8074	0.313498
29.8257	0.290418
29.844	0.315421
29.8624	0.261569
29.8807	0.261569
29.899	0.319268
29.9174	0.290418
29.9357	0.236566
29.954	0.253875
29.9724	0.265415
29.9907	0.257722
30.0091	0.234642
30.0274	0.263492
30.0457	0.215409
30.0641	0.248106
30.0824	0.280802
30.1007	0.234642
30.1191	0.246182
30.1374	0.244259
30.1558	0.219256
30.1741	0.196176
30.1924	0.238489
30.2108	0.232719
30.2291	0.213486
30.2474	0.225026
30.2658	0.242336
30.2841	0.205793
30.3024	0.205793
30.3208	0.213486
30.3391	0.20964
30.3575	0.261569
30.3758	0.276955
30.3941	0.211563
30.4125	0.200023
30.4308	0.251952
30.4491	0.228873
30.4675	0.261569
30.4858	0.269262
30.5042	0.207716
30.5225	0.225026
30.5408	0.240412
30.5592	0.253875
30.5775	0.221179
30.5958	0.215409
30.6142	0.242336
30.6325	0.223103
30.6508	0.261569
30.6692	0.234642
30.6875	0.271185
30.7059	0.248106
30.7242	0.271185
30.7425	0.263492
30.7609	0.280802
30.7792	0.263492
30.7975	0.259645
30.8159	0.257722
30.8342	0.253875
30.8526	0.255799
30.8709	0.226949
30.8892	0.300035
30.9076	0.223103
30.9259	0.230796
30.9442	0.205793
30.9626	0.255799
30.9809	0.223103
30.9992	0.221179
31.0176	0.269262
31.0359	0.263492
31.0543	0.226949
31.0726	0.267339
31.0909	0.250029
31.1093	0.311574
31.1276	0.215409
31.1459	0.251952
31.1643	0.286572
31.1826	0.259645
31.201	0.309651
31.2193	0.309651
31.2376	0.296188
31.256	0.346194
31.2743	0.37889
31.2926	0.35581
31.311	0.409663
31.3293	0.36158
31.3477	0.421202
31.366	0.423126
31.3843	0.432742
31.4027	0.386583
31.421	0.386583
31.4393	0.380813
31.4577	0.342347
31.476	0.375043
31.4943	0.317344
31.5127	0.35004
31.531	0.338501
31.5494	0.35004
31.5677	0.334654
31.586	0.338501
31.6044	0.294265
31.6227	0.307728
31.641	0.342347
31.6594	0.325038
31.6777	0.313498
31.6961	0.284648
31.7144	0.292341
31.7327	0.334654
31.7511	0.253875
31.7694	0.267339
31.7877	0.267339
31.8061	0.240412
31.8244	0.225026
31.8427	0.205793
31.8611	0.250029
31.8794	0.242336
31.8978	0.225026
31.9161	0.223103
31.9344	0.267339
31.9528	0.20387
31.9711	0.20964
31.9894	0.18656
32.0078	0.219256
32.0261	0.253875
32.0445	0.20387
32.0628	0.207716
32.0811	0.200023
32.0995	0.194253
32.1178	0.240412
32.1361	0.217333
32.1545	0.238489
32.1728	0.228873
32.1911	0.236566
32.2095	0.228873
32.2278	0.236566
32.2462	0.223103
32.2645	0.230796
32.2828	0.213486
32.3012	0.236566
32.3195	0.205793
32.3378	0.225026
32.3562	0.200023
32.3745	0.219256
32.3929	0.259645
32.4112	0.232719
32.4295	0.280802
32.4479	0.244259
32.4662	0.255799
32.4845	0.278878
32.5029	0.296188
32.5212	0.259645
32.5395	0.309651
32.5579	0.248106
32.5762	0.284648
32.5946	0.261569
32.6129	0.251952
32.6312	0.276955
32.6496	0.255799
32.6679	0.292341
32.6862	0.284648
32.7046	0.271185
32.7229	0.228873
32.7413	0.236566
32.7596	0.248106
32.7779	0.267339
32.7963	0.223103
32.8146	0.230796
32.8329	0.257722
32.8513	0.215409
32.8696	0.238489
32.888	0.255799
32.9063	0.201946
32.9246	0.211563
32.943	0.200023
32.9613	0.263492
32.9796	0.219256
32.998	0.201946
33.0163	0.225026
33.0346	0.219256
33.053	0.217333
33.0713	0.211563
33.0897	0.234642
33.108	0.1981
33.1263	0.184637
33.1447	0.259645
33.163	0.257722
33.1813	0.188483
33.1997	0.213486
33.218	0.20387
33.2364	0.225026
33.2547	0.217333
33.273	0.20387
33.2914	0.20387
33.3097	0.219256
33.328	0.1981
33.3464	0.240412
33.3647	0.255799
33.383	0.238489
33.4014	0.238489
33.4197	0.20387
33.4381	0.217333
33.4564	0.221179
33.4747	0.221179
33.4931	0.257722
33.5114	0.221179
33.5297	0.246182
33.5481	0.225026
33.5664	0.240412
33.5848	0.225026
33.6031	0.223103
33.6214	0.255799
33.6398	0.250029
33.6581	0.267339
33.6764	0.286572
33.6948	0.255799
33.7131	0.271185
33.7314	0.288495
33.7498	0.301958
33.7681	0.303881
33.7865	0.35581
33.8048	0.328884
33.8231	0.398123
33.8415	0.407739
33.8598	0.465438
33.8781	0.457745
33.8965	0.550063
33.9148	0.557757
33.9332	0.594299
33.9515	0.586606
33.9698	0.667385
33.9882	0.611609
34.0065	0.625072
34.0248	0.551987
34.0432	0.569296
34.0615	0.540447
34.0798	0.457745
34.0982	0.446205
34.1165	0.392353
34.1349	0.403893
34.1532	0.330807
34.1715	0.351964
34.1899	0.305805
34.2082	0.323114
34.2265	0.273108
34.2449	0.301958
34.2632	0.305805
34.2816	0.244259
34.2999	0.255799
34.3182	0.253875
34.3366	0.269262
34.3549	0.253875
34.3732	0.236566
34.3916	0.221179
34.4099	0.215409
34.4282	0.207716
34.4466	0.207716
34.4649	0.182713
34.4833	0.225026
34.5016	0.217333
34.5199	0.20964
34.5383	0.182713
34.5566	0.20387
34.5749	0.217333
34.5933	0.182713
34.6116	0.213486
34.63	0.1981
34.6483	0.184637
34.6666	0.226949
34.685	0.20387
34.7033	0.178867
34.7216	0.188483
34.74	0.219256
34.7583	0.176943
34.7767	0.20964
34.795	0.238489
34.8133	0.1981
34.8317	0.207716
34.85	0.238489
34.8683	0.217333
34.8867	0.200023
34.905	0.207716
34.9233	0.20964
34.9417	0.225026
34.96	0.226949
34.9784	0.200023
34.9967	0.205793
35.015	0.232719
35.0334	0.232719
35.0517	0.213486
35.07	0.244259
35.0884	0.18079
35.1067	0.211563
35.1251	0.226949
35.1434	0.18656
35.1617	0.230796
35.1801	0.213486
35.1984	0.211563
35.2167	0.18656
35.2351	0.215409
35.2534	0.240412
35.2717	0.242336
35.2901	0.211563
35.3084	0.228873
35.3268	0.190407
35.3451	0.267339
35.3634	0.205793
35.3818	0.263492
35.4001	0.265415
35.4184	0.290418
35.4368	0.278878
35.4551	0.280802
35.4735	0.259645
35.4918	0.278878
35.5101	0.348117
35.5285	0.346194
35.5468	0.36158
35.5651	0.415433
35.5835	0.400046
35.6018	0.357734
35.6201	0.388506
35.6385	0.467362
35.6568	0.453899
35.6752	0.417356
35.6935	0.401969
35.7118	0.371197
35.7302	0.365427
35.7485	0.326961
35.7668	0.292341
35.7852	0.35004
35.8035	0.275032
35.8219	0.263492
35.8402	0.305805
35.8585	0.271185
35.8769	0.244259
35.8952	0.273108
35.9135	0.263492
35.9319	0.219256
35.9502	0.242336
35.9685	0.261569
35.9869	0.261569
36.0052	0.269262
36.0236	0.230796
36.0419	0.20964
36.0602	0.1981
36.0786	0.223103
36.0969	0.20964
36.1152	0.242336
36.1336	0.253875
36.1519	0.194253
36.1703	0.226949
36.1886	0.240412
36.2069	0.211563
36.2253	0.205793
36.2436	0.230796
36.2619	0.234642
36.2803	0.18079
36.2986	0.165404
36.317	0.20387
36.3353	0.178867
36.3536	0.20964
36.372	0.242336
36.3903	0.230796
36.4086	0.190407
36.427	0.178867
36.4453	0.182713
36.4636	0.19233
36.482	0.19233
36.5003	0.205793
36.5187	0.182713
36.537	0.205793
36.5553	0.221179
36.5737	0.1981
36.592	0.201946
36.6103	0.248106
36.6287	0.242336
36.647	0.184637
36.6654	0.250029
36.6837	0.213486
36.702	0.246182
36.7204	0.207716
36.7387	0.1981
36.757	0.201946
36.7754	0.255799
36.7937	0.246182
36.812	0.215409
36.8304	0.18079
36.8487	0.253875
36.8671	0.196176
36.8854	0.201946
36.9037	0.20964
36.9221	0.184637
36.9404	0.217333
36.9587	0.201946
36.9771	0.211563
36.9954	0.217333
37.0138	0.20964
37.0321	0.200023
37.0504	0.16348
37.0688	0.196176
37.0871	0.173097
37.1054	0.234642
37.1238	0.190407
37.1421	0.207716
37.1604	0.144247
37.1788	0.17502
37.1971	0.17502
37.2155	0.157711
37.2338	0.205793
37.2521	0.184637
37.2705	0.190407
37.2888	0.217333
37.3071	0.146171
37.3255	0.188483
37.3438	0.228873
37.3622	0.178867
37.3805	0.18656
37.3988	0.219256
37.4172	0.194253
37.4355	0.17502
37.4538	0.19233
37.4722	0.182713
37.4905	0.182713
37.5088	0.16348
37.5272	0.184637
37.5455	0.18656
37.5639	0.178867
37.5822	0.16348
37.6005	0.238489
37.6189	0.167327
37.6372	0.188483
37.6555	0.18079
37.6739	0.184637
37.6922	0.20387
37.7106	0.157711
37.7289	0.196176
37.7472	0.165404
37.7656	0.213486
37.7839	0.19233
37.8022	0.178867
37.8206	0.196176
37.8389	0.161557
37.8573	0.17502
37.8756	0.178867
37.8939	0.211563
37.9123	0.18656
37.9306	0.176943
37.9489	0.16925
37.9673	0.161557
37.9856	0.16348
38.0039	0.205793
38.0223	0.194253
38.0406	0.219256
38.059	0.17502
38.0773	0.1981
38.0956	0.173097
38.114	0.161557
38.1323	0.151941
38.1506	0.18656
38.169	0.182713
38.1873	0.16348
38.2057	0.190407
38.224	0.223103
38.2423	0.142324
38.2607	0.173097
38.279	0.211563
38.2973	0.19233
38.3157	0.176943
38.334	0.200023
38.3523	0.1981
38.3707	0.165404
38.389	0.200023
38.4074	0.159634
38.4257	0.16925
38.444	0.207716
38.4624	0.144247
38.4807	0.140401
38.499	0.165404
38.5174	0.188483
38.5357	0.18656
38.5541	0.200023
38.5724	0.194253
38.5907	0.200023
38.6091	0.196176
38.6274	0.184637
38.6457	0.190407
38.6641	0.184637
38.6824	0.217333
38.7007	0.205793
38.7191	0.184637
38.7374	0.20387
38.7558	0.196176
38.7741	0.1981
38.7924	0.1981
38.8108	0.211563
38.8291	0.213486
38.8474	0.17502
38.8658	0.223103
38.8841	0.223103
38.9025	0.217333
38.9208	0.250029
38.9391	0.182713
38.9575	0.250029
38.9758	0.238489
38.9941	0.228873
39.0125	0.219256
39.0308	0.284648
39.0491	0.207716
39.0675	0.269262
39.0858	0.226949
39.1042	0.213486
39.1225	0.267339
39.1408	0.263492
39.1592	0.267339
39.1775	0.251952
39.1958	0.217333
39.2142	0.221179
39.2325	0.201946
39.2509	0.213486
39.2692	0.178867
39.2875	0.161557
39.3059	0.207716
39.3242	0.194253
39.3425	0.20387
39.3609	0.226949
39.3792	0.213486
39.3975	0.232719
39.4159	0.255799
39.4342	0.207716
39.4526	0.228873
39.4709	0.226949
39.4892	0.217333
39.5076	0.221179
39.5259	0.20964
39.5442	0.200023
39.5626	0.223103
39.5809	0.232719
39.5993	0.219256
39.6176	0.215409
39.6359	0.257722
39.6543	0.311574
39.6726	0.280802
39.6909	0.326961
39.7093	0.34427
39.7276	0.309651
39.746	0.334654
39.7643	0.303881
39.7826	0.307728
39.801	0.323114
39.8193	0.292341
39.8376	0.263492
39.856	0.259645
39.8743	0.250029
39.8926	0.267339
39.911	0.248106
39.9293	0.1981
39.9477	0.250029
39.966	0.20964
39.9843	0.1981
40.0027	0.221179
40.021	0.188483
40.0393	0.20387
40.0577	0.17502
40.076	0.213486
40.0944	0.196176
40.1127	0.242336
40.131	0.173097
40.1494	0.228873
40.1677	0.217333
40.186	0.253875
40.2044	0.217333
40.2227	0.225026
40.241	0.259645
40.2594	0.213486
40.2777	0.234642
40.2961	0.232719
40.3144	0.207716
40.3327	0.228873
40.3511	0.269262
40.3694	0.267339
40.3877	0.20387
40.4061	0.16925
40.4244	0.211563
40.4428	0.240412
40.4611	0.219256
40.4794	0.215409
40.4978	0.205793
40.5161	0.253875
40.5344	0.20964
[truncated: 1,056 more rows]

[truncated: 9 more sheets: Heating 125 °C, Heating 135 °C, Heating 145 °C, Heating 155 °C, Heating 165 °C, Heating 175 °C, Heating 185 °C, Heating 195 °C, Heating 205 °C]
